# Supplementary material for: Exploiting differential Wnt target gene expression to generate a molecular biomarker for colorectal cancer stratification
Source: Gut. 2019 Sep 28;69(6):1092–103. doi: 10.1136/gutjnl-2019-319126 (PMC7212029; doi:10.1136/gutjnl-2019-319126)
Supplement: Supplementary data [file gutjnl-2019-319126supp003.xlsx]

## Sheet: Sup Table 1
Supplementary Table 1: Summary of molecular and histopathological profiling in each sample cohort.
Cohort	Sub-group	DNA sequencing	Methylation array	PCR	RNA sequencing	RNA microarray	Slide scanner
Polyps		Custom SureSelect Library Prep Kit (80 CRC driver genes, see sup table 13)			Ribosomal RNA depletion	Almac Xcel array
Discovery	A	Exome capture	Infinium HumanMethylation450 BeadChip (Illumina)		Poly-A transcript enrichment
	B	Exome capture			Poly-A transcript enrichment
	Pan-cancer	Exome capture			Poly-A transcript enrichment
Validation	A and B	Custom SureSelect Library Prep Kit (80 CRC driver genes, see sup table 13)			Custom QIAseq Targeted RNAscan panel (Qiagen)	Almac Xcel array	Aperio
Clinical application				qRT-PCR for AXIN2 and RSPO3 (Fluidigm)	3' tag amplification (QuantSeq/Lexogen); Custom QIAseq Targeted RNAscan panel (Qiagen)		Hamamatsu Nanozoomer (200x)

## Sheet: Sup Table 2
Supplementary Table 2: Summary of clinicopathological data for polyps cohort
sample	path	age	gender	braf	kras	msi	mlh1_methylation	pathology_report
SC00765A	TVA	57.9699	M	0	1	0	0	50 mm rectal villous adenoma. 100% classical villosity. 50% HGD. Adenocarcinoma
SC00766A	TVA	83.4219	M	0	1	0	0	30mm upper rectum. TVA. 60% palmate villosity. LGD
SC00767A	TVA	60.4767	F	0	1	0	0	recto sigmoid 40mm. TVA. Villosity 60%. HGD 30%. Mod diff adenocarcinoma
SC00768A	TVA	58.6904	F	0	1	0	0	rectum 30mm. TVA 40% villosity. LGD with HGD 5%
SC00769A	TVA	89.7836	M	0	1	0	0	40mm rectal. TA with less than 20% villosity. LGD.
SC00770A	TVA	65.189	M	0	0	0	0	rectum 25mm. VA with >80% villosity. LGD with HGD in 10%. No ECF
SC00771A	TVA	84.7425	M	0	0	0	0	Rectum/anal verge 15mm. TVA villosity 30%, HGD 5%
SC00772A	TVA	49.2329	F	0	1	0	0	15mm rectal TVA. Villosity 30%. LGD
SC00773A	TVA	57.7973	F	0	1	0	0	20mm rectum. TVA. 20% villosity. LGD
SC00774A	TVA	55.5123	M	0	0	0	0	Rectum. TVA. Villosity 30%. Invasive Adenocarcinoma arising from polyp
SC00775A	TVA	65.2274	F	0	1	0	0	recto sigmoid 30mm. VA.Villosity 90%. HGD in 10%.
SC00777A	TVA	58.2466	M	0	1	0	0	25mm rectum. Villous adenoma. 90% villosity, LGD
SC00778A	TVA	80.7205	F	0	0	0	0	Rectum, 30mm, TVA wth low grade dysplasia
SC00779A	TVA	68.6356	F	0	1	0	0	Descending, 80mm likely TVA
SC00780A	TVA	75.5288	F	0	1	0	0	35mm transverse. Villous adenoma. 95% palmate villosity. 15% HGD. Marked Paneth cell hyperplasia
SC00781A	TVA	65.2384	F	0	1	0	0	25mm transverse. TVA with a few ectopic crypts. 60% villosity. LGD
SC00782A	TVA	74.6795	M	0	0	0	0	50mm hepatic. Villous adenoma. 95% palmate villosity. LGD
SC00783A	TVA	64.074	M	0	1	0	0	caecal 25mm VA 90% villosity. LGD with 5% HGD
SC00784A	TVA	71.7836	F	0	0	0	0	35mm Ascending. TA. LGD
SC00785A	TVA	55.9507	M	0	1	0	0	ascending 30mm. Complex TVA. Villosity 70%. HGD in 5%. several ECF but no eosinophilic cytoplasm
SC00786A	TVA	70.5699	F	0	0	0	0	Ascending 30mm. TVA. Villosity 60%. LGD
SC00787A	TVA	50.3342	M	0	1	0	0	ICV 20mm. VA with 100% villosity. HGD in 30%
SC00788A	TVA	72.1699	M	0	0	0	0	transverse 40mm VA. Villosity 90%. LGD.
SC00789A	TVA	62.9863	M	0	1	0	0	caecum 40mm. TVA. Villosity 30%. HGD 10%
SC00790A	TVA	62.9781	F	0	1	0	0	Ascending, 40mm TVA with low grade dysplasia
SC00791A	TVA	66.0466	F	0	1	0	0	Transverse, 60mm TVA, predominantly low grade and focal high grade 15%
SC00792A	TVA	74.6795	M	0	1	0	0	caecum 20m. TVA. Villosity 40%. LGD
SC00793A	TVA	60.4493	M	0	0	0	0	Ascending 40mm. TVA. Villosity 70% LGD with 5% HGD
SC00794A	TVA	70.2274	F	0	1	0	0	Caecal LST around valve. TVA. 50% villosity. LGD
SC00755A	TSA	65.6849	F	0	1	0	0	30mm rectal piecemeal. Mixed VA andTSA. HGD 70%
SC00756A	TSA	85.9123	M	1	0	0	0	50 rectal. Mixed TVA and TSA. Villosity 80%. Ectopic crypts and eosinophilic. LGD
SC00757A	TSA	67.9096	M	1	0	0	0	rectum 40mm. TSA. LGD. Lots of ECF. Good sample
SC00758A	TSA	50.8164	F	0	0	0	0	50mm ascending TVA with HGD 10%. Marked TSA features with lots of ectopic crypts. Difficult lesion
SC00759A	TSA	71.1397	M	1	0	0	0	rectum 35mm. TSA. Lots ectopic crypts. Good sample
SC00760A	TSA	75.7918	M	0	1	0	0	rectum 80mm TSA (60%) with TVA (40%) components. Good sample. LGD
SC00761A	TSA	84.7014	M	0	1	0	0	Rectum, 45mm mixed traditional serrated adenoma (majority of polyp) with also features of a TVA with conventional dysplasia (minority of polyp). The majority of the polyp shows low grade dysplasia however focally a focus of high grade dysplasia is identified (<5%)
SC00762A	TSA	58.9123	F	0	1	0	0	Rectum, 80mm LST, Traditional serrated adenoma 95% low grade dysplasia, and 5% high grade dysplasia
SC00763A	TSA	84.5753	F	0	1	0	0	30mm rectal TSA with LGD and HGD (30%)
SC00764A	TSA	79.8219	F	1	0	0	0	25mm sigmoid. TSA. Ectopic crypts, pencillate, LGD
SC00795A	SSA	52.3452	M	1	0	0	0	12mm ascending. SSA no dysplasia
SC00796A	SSA	52.3452	M	0	1	0	0	25mm ascending SSA. No dysplasia
SC00797A	SSA	52.3452	M	0	0	0	0	15mm ascending SSA. No dyplasia
SC00798A	SSA	70.8027	M	1	0	0	0	ascending 10mm SSA no dyplasia. Good example
SC00799A	SSA	70.8027	M	1	0	0	0	ascending 10mm SSA no dyplasia Good example
SC00800A	SSA	70.8027	M	1	0	0	0	ascending 15mm. SSA no dyplasis. Good example
SC00801A	SSA	69.2027	F	0	0	0	0	proximal SSA
SC00802A	SSA	68.5425	F	1	0	0	0	Caecum, 60-70mm sessile serrated
SC00803A	SSA	67.2986	F	1	0	0	0	caecum 30mm. SSA with tiny focus of top down LGD dysplasia
SC00804A	SSA	35.5836	M	1	0	0	0	ascending colon 10mm. SSA. No dysplasia
SC00805A	SSA	71.6904	F	1	0	0	0	CaecalSessile serrated lesion with LGD, profound IEL's
SC00806A	SSA	66.7288	F	1	0	0	0	trans 22mm SSA no dysplasia good sample
SC00807A	SSA	77.2712	F	1	0	0	0	ascending 30mm. SSA. No dysplasia
SC00808A	SSA	72.7452	F	1	0	0	0	Caecum, 35mm Sessile serrated, no dysplasia
SC00809A	SSA	67.2795	F	1	0	0	1	15mm transverse SSA. No dysplasia

## Sheet: Sup Table 3
Supplementary Table 3: Mutation calls for single nucleotide variants and indels affecting APC, CTNNB1 and RNF43 detected in each cohort (discovery and validation).
Cohort	Tumor_Sample_Barcode	Primary_site	Hugo_Symbol	NCBI_Build	Chromosome	Start_Position	End_Position	Variant_Classification	Variant_Type	Reference_Allele	Tumor_Seq_Allele1	Tumor_Seq_Allele2	HGVSc	HGVSp	HGVSp_Short	Transcript_ID	Exon_Number	cDNA_position	CDS_position	Protein_position	Amino_acids	Codons
DC_B	GENENt_12912	colorectal	APC	GRCh37	5	112173917	112173917	Nonsense_Mutation	SNP	C	C	T	c.2626C>T	p.Arg876Ter	p.R876*	ENST00000457016	16/16	3006/11025	2626/8532	876/2843	R/*	Cga/Tga
DC_B	GENENt_12912	colorectal	APC	GRCh37	5	112175639	112175639	Nonsense_Mutation	SNP	C	C	T	c.4348C>T	p.Arg1450Ter	p.R1450*	ENST00000457016	16/16	4728/11025	4348/8532	1450/2843	R/*	Cga/Tga
DC_B	GENENt_12914	colorectal	APC	GRCh37	5	112174631	112174631	Nonsense_Mutation	SNP	C	C	T	c.3340C>T	p.Arg1114Ter	p.R1114*	ENST00000457016	16/16	3720/11025	3340/8532	1114/2843	R/*	Cga/Tga
DC_B	GENENt_12914	colorectal	APC	GRCh37	5	112175876	112175876	Nonsense_Mutation	SNP	C	C	T	c.4585C>T	p.Gln1529Ter	p.Q1529*	ENST00000457016	16/16	4965/11025	4585/8532	1529/2843	Q/*	Cag/Tag
DC_B	GENENt_12915	colorectal	APC	GRCh37	5	112175676	112175677	Frame_Shift_Del	DEL	AG	AG	-	c.4393_4394delAG	p.Ser1465TrpfsTer3	p.S1465Wfs*3	ENST00000457016	16/16	4765-4766/11025	4385-4386/8532	1462/2843	K/X	aAG/a
DC_B	GENENt_12915	colorectal	RNF43	GRCh37	17	56435161	56435161	Frame_Shift_Del	DEL	C	C	-	c.1976delG	p.Gly659ValfsTer41	p.G659Vfs*41	ENST00000584437	8/9	3932/5575	1976/2352	659/783	G/X	gGt/gt
DC_B	GENENt_12919	colorectal	RNF43	GRCh37	17	56435161	56435161	Frame_Shift_Del	DEL	C	C	-	c.1976delG	p.Gly659ValfsTer41	p.G659Vfs*41	ENST00000584437	8/9	3932/5575	1976/2352	659/783	G/X	gGt/gt
DC_B	GENENt_12919	colorectal	RNF43	GRCh37	17	56439919	56439919	Frame_Shift_Del	DEL	G	G	-	c.673delC	p.Arg225AlafsTer194	p.R225Afs*194	ENST00000584437	5/9	2629/5575	673/2352	225/783	R/X	Cgc/gc
DC_B	GENENt_12919	colorectal	RNF43	GRCh37	17	56448298	56448298	Frame_Shift_Del	DEL	G	G	-	c.349delC	p.Arg117AlafsTer41	p.R117Afs*41	ENST00000584437	2/9	2305/5575	349/2352	117/783	R/X	Cgc/gc
DC_B	GENENt_12926	colorectal	RNF43	GRCh37	17	56440943	56440943	Nonsense_Mutation	SNP	G	G	A	c.394C>T	p.Arg132Ter	p.R132*	ENST00000584437	3/9	2350/5575	394/2352	132/783	R/*	Cga/Tga
DC_B	GENENt_14954	colorectal	APC	GRCh37	5	112175423	112175423	Nonsense_Mutation	SNP	C	C	T	c.4132C>T	p.Gln1378Ter	p.Q1378*	ENST00000457016	16/16	4512/11025	4132/8532	1378/2843	Q/*	Cag/Tag
DC_B	GENENt_14961	colorectal	RNF43	GRCh37	17	56440943	56440943	Nonsense_Mutation	SNP	G	G	A	c.394C>T	p.Arg132Ter	p.R132*	ENST00000584437	3/9	2350/5575	394/2352	132/783	R/*	Cga/Tga
DC_B	GENENt_31814	colorectal	APC	GRCh37	5	112173783	112173784	Frame_Shift_Ins	INS	-	-	A	c.2493dupA	p.Pro832ThrfsTer12	p.P832Tfs*12	ENST00000457016	16/16	2872-2873/11025	2492-2493/8532	831/2843	L/LX	tta/ttAa
DC_B	GENENt_31814	colorectal	APC	GRCh37	5	112175529	112175532	Frame_Shift_Del	DEL	TGGT	TGGT	-	c.4238_4241delTGGT	p.Met1413LysfsTer5	p.M1413Kfs*5	ENST00000457016	16/16	4618-4621/11025	4238-4241/8532	1413-1414/2843	MV/X	aTGGTa/aa
DC_B	GENENt_32098	colorectal	APC	GRCh37	5	112175438	112175439	Frame_Shift_Del	DEL	AT	AT	-	c.4147_4148delAT	p.Met1383ValfsTer2	p.M1383Vfs*2	ENST00000457016	16/16	4527-4528/11025	4147-4148/8532	1383/2843	M/X	ATg/g
DC_B	GENENt_32109	colorectal	CTNNB1	GRCh37	3	41266136	41266136	Missense_Mutation	SNP	T	T	C	c.133T>C	p.Ser45Pro	p.S45P	ENST00000349496	3/15	413/3729	133/2346	45/781	S/P	Tct/Cct
DC_B	GENENt_32109	colorectal	RNF43	GRCh37	17	56435094	56435094	Frame_Shift_Del	DEL	A	A	-	c.2043delT	p.His683IlefsTer17	p.H683Ifs*17	ENST00000584437	8/9	3999/5575	2043/2352	681/783	F/X	ttT/tt
DC_B	GENENt_32116	colorectal	APC	GRCh37	5	112103082	112103085	Frame_Shift_Del	DEL	AGAG	AGAG	-	c.419_422delAGAG	p.Glu140GlyfsTer29	p.E140Gfs*29	ENST00000457016	4/16	797-800/11025	417-420/8532	139-140/2843	KE/X	aaAGAG/aa
DC_B	GENENt_32116	colorectal	APC	GRCh37	5	112175752	112175752	Frame_Shift_Del	DEL	T	T	-	c.4463delT	p.Leu1488TyrfsTer19	p.L1488Yfs*19	ENST00000457016	16/16	4841/11025	4461/8532	1487/2843	T/X	acT/ac
DC_B	GENENt_32123	colorectal	APC	GRCh37	5	112175303	112175303	Nonsense_Mutation	SNP	C	C	T	c.4012C>T	p.Gln1338Ter	p.Q1338*	ENST00000457016	16/16	4392/11025	4012/8532	1338/2843	Q/*	Cag/Tag
DC_B	GENENt_32192	colorectal	APC	GRCh37	5	112175212	112175216	Frame_Shift_Del	DEL	AAAAG	AAAAG	-	c.3927_3931delAAAGA	p.Glu1309AspfsTer4	p.E1309Dfs*4	ENST00000457016	16/16	4301-4305/11025	3921-3925/8532	1307-1309/2843	IKE/IX	atAAAAGaa/ataa
DC_B	GENENt_32210	colorectal	APC	GRCh37	5	112164616	112164616	Nonsense_Mutation	SNP	C	C	T	c.1690C>T	p.Arg564Ter	p.R564*	ENST00000457016	14/16	2070/11025	1690/8532	564/2843	R/*	Cga/Tga
DC_B	GENENt_32359	colorectal	APC	GRCh37	5	112175248	112175248	Frame_Shift_Del	DEL	T	-	-	c.3957delT	p.Val1320Ter	p.V1320*	ENST00000457016	16/16	4337/11025	3957/8532	1319/2843	P/X	ccT/cc
DC_B	GENENt_32360	colorectal	APC	GRCh37	5	112174658	112174659	Frame_Shift_Ins	INS	-	-	A	c.3371dupA	p.Asn1124LysfsTer11	p.N1124Kfs*11	ENST00000457016	16/16	3747-3748/11025	3367-3368/8532	1123/2843	Q/QX	caa/cAaa
DC_B	GENENt_32360	colorectal	APC	GRCh37	5	112175676	112175677	Frame_Shift_Del	DEL	AG	AG	-	c.4393_4394delAG	p.Ser1465TrpfsTer3	p.S1465Wfs*3	ENST00000457016	16/16	4765-4766/11025	4385-4386/8532	1462/2843	K/X	aAG/a
DC_B	GENENt_32360	colorectal	RNF43	GRCh37	17	56436028	56436028	Frame_Shift_Del	DEL	G	G	-	c.1109delC	p.Pro370HisfsTer49	p.P370Hfs*49	ENST00000584437	8/9	3065/5575	1109/2352	370/783	P/X	cCa/ca
DC_B	GENENt_32360	colorectal	RNF43	GRCh37	17	56448298	56448298	Frame_Shift_Del	DEL	G	G	-	c.349delC	p.Arg117AlafsTer41	p.R117Afs*41	ENST00000584437	2/9	2305/5575	349/2352	117/783	R/X	Cgc/gc
DC_B	GENENt_32365	colorectal	APC	GRCh37	5	112174217	112174217	Nonsense_Mutation	SNP	A	A	T	c.2926A>T	p.Arg976Ter	p.R976*	ENST00000457016	16/16	3306/11025	2926/8532	976/2843	R/*	Aga/Tga
DC_B	GENENt_32367	colorectal	APC	GRCh37	5	112175753	112175754	Frame_Shift_Ins	INS	-	-	TA	c.4464_4465dupAT	p.Leu1489TyrfsTer19	p.L1489Yfs*19	ENST00000457016	16/16	4842-4843/11025	4462-4463/8532	1488/2843	L/LX	tta/tTAta
DC_B	GENENt_32369	colorectal	APC	GRCh37	5	112173917	112173917	Nonsense_Mutation	SNP	C	C	T	c.2626C>T	p.Arg876Ter	p.R876*	ENST00000457016	16/16	3006/11025	2626/8532	876/2843	R/*	Cga/Tga
DC_B	GENENt_32374	colorectal	APC	GRCh37	5	112175852	112175852	Nonsense_Mutation	SNP	G	G	T	c.4561G>T	p.Glu1521Ter	p.E1521*	ENST00000457016	16/16	4941/11025	4561/8532	1521/2843	E/*	Gaa/Taa
DC_B	GENENt_32383	colorectal	APC	GRCh37	5	112175162	112175162	Frame_Shift_Del	DEL	C	C	-	c.3871delC	p.Gln1291ArgfsTer14	p.Q1291Rfs*14	ENST00000457016	16/16	4251/11025	3871/8532	1291/2843	Q/X	Cag/ag
DC_B	GENENt_32385	colorectal	APC	GRCh37	5	112175746	112175746	Frame_Shift_Del	DEL	T	T	-	c.4455delT	p.Asp1486IlefsTer21	p.D1486Ifs*21	ENST00000457016	16/16	4835/11025	4455/8532	1485/2843	A/X	gcT/gc
DC_B	GENENt_32387	colorectal	APC	GRCh37	5	112173556	112173565	Frame_Shift_Del	DEL	GAAACAAAAA	GAAACAAAAA	-	c.2266_2275delAAACAAAAAG	p.Lys756ProfsTer2	p.K756Pfs*2	ENST00000457016	16/16	2645-2654/11025	2265-2274/8532	755-758/2843	RKQK/X	agGAAACAAAAA/ag
DC_B	GENENt_32389	colorectal	APC	GRCh37	5	112175513	112175513	Nonsense_Mutation	SNP	G	G	T	c.4222G>T	p.Glu1408Ter	p.E1408*	ENST00000457016	16/16	4602/11025	4222/8532	1408/2843	E/*	Gaa/Taa
DC_B	GENENt_32722	colorectal	RNF43	GRCh37	17	56432310	56432311	Frame_Shift_Ins	INS	-	-	GCCT	c.2342_2345dupAGGC	p.Val783GlyfsTer101	p.V783Gfs*101	ENST00000584437	9/9	4301-4302/5575	2345-2346/2352	782/783	A/AGX	gct/gcAGGCt
DC_B	GENENt_32722	colorectal	RNF43	GRCh37	17	56435161	56435161	Frame_Shift_Del	DEL	C	C	-	c.1976delG	p.Gly659ValfsTer41	p.G659Vfs*41	ENST00000584437	8/9	3932/5575	1976/2352	659/783	G/X	gGt/gt
DC_B	GENENt_32738	colorectal	APC	GRCh37	5	112116598	112116598	Nonsense_Mutation	SNP	C	C	T	c.643C>T	p.Gln215Ter	p.Q215*	ENST00000457016	6/16	1023/11025	643/8532	215/2843	Q/*	Cag/Tag
DC_B	GENENt_32738	colorectal	APC	GRCh37	5	112175447	112175447	Nonsense_Mutation	SNP	A	A	T	c.4156A>T	p.Arg1386Ter	p.R1386*	ENST00000457016	16/16	4536/11025	4156/8532	1386/2843	R/*	Aga/Tga
DC_B	GENENt_32770	colorectal	APC	GRCh37	5	112174631	112174631	Nonsense_Mutation	SNP	C	C	T	c.3340C>T	p.Arg1114Ter	p.R1114*	ENST00000457016	16/16	3720/11025	3340/8532	1114/2843	R/*	Cga/Tga
DC_B	GENENt_32770	colorectal	APC	GRCh37	5	112175207	112175207	Nonsense_Mutation	SNP	G	G	T	c.3916G>T	p.Glu1306Ter	p.E1306*	ENST00000457016	16/16	4296/11025	3916/8532	1306/2843	E/*	Gaa/Taa
DC_B	GENENt_32772	colorectal	APC	GRCh37	5	112175225	112175225	Nonsense_Mutation	SNP	G	G	T	c.3934G>T	p.Gly1312Ter	p.G1312*	ENST00000457016	16/16	4314/11025	3934/8532	1312/2843	G/*	Gga/Tga
DC_B	GENENt_32772	colorectal	APC	GRCh37	5	112164566	112164566	Frame_Shift_Del	DEL	T	T	-	c.1643delT	p.Leu548Ter	p.L548*	ENST00000457016	14/16	2020/11025	1640/8532	547/2843	V/X	gTt/gt
DC_B	GENENt_32774	colorectal	RNF43	GRCh37	17	56435161	56435161	Frame_Shift_Del	DEL	C	C	-	c.1976delG	p.Gly659ValfsTer41	p.G659Vfs*41	ENST00000584437	8/9	3932/5575	1976/2352	659/783	G/X	gGt/gt
DC_B	GENENt_32782	colorectal	APC	GRCh37	5	112175752	112175755	Frame_Shift_Del	DEL	TTTA	TTTA	-	c.4463_4466delTATT	p.Leu1488TyrfsTer18	p.L1488Yfs*18	ENST00000457016	16/16	4841-4844/11025	4461-4464/8532	1487-1488/2843	TL/X	acTTTA/ac
DC_B	GENENt_32788	colorectal	CTNNB1	GRCh37	3	41266124	41266124	Missense_Mutation	SNP	A	A	G	c.121A>G	p.Thr41Ala	p.T41A	ENST00000349496	3/15	401/3729	121/2346	41/781	T/A	Acc/Gcc
DC_B	GENENt_32798	colorectal	APC	GRCh37	5	112173394	112173394	Frame_Shift_Del	DEL	G	G	-	c.2107delG	p.Ala703GlnfsTer15	p.A703Qfs*15	ENST00000457016	16/16	2483/11025	2103/8532	701/2843	M/X	atG/at
DC_B	GENENt_32798	colorectal	APC	GRCh37	5	112175676	112175677	Frame_Shift_Del	DEL	AG	AG	-	c.4393_4394delAG	p.Ser1465TrpfsTer3	p.S1465Wfs*3	ENST00000457016	16/16	4765-4766/11025	4385-4386/8532	1462/2843	K/X	aAG/a
DC_B	GENENt_32798	colorectal	RNF43	GRCh37	17	56435161	56435161	Frame_Shift_Del	DEL	C	C	-	c.1976delG	p.Gly659ValfsTer41	p.G659Vfs*41	ENST00000584437	8/9	3932/5575	1976/2352	659/783	G/X	gGt/gt
DC_B	GENENt_32800	colorectal	APC	GRCh37	5	112128191	112128191	Nonsense_Mutation	SNP	C	C	T	c.694C>T	p.Arg232Ter	p.R232*	ENST00000457016	7/16	1074/11025	694/8532	232/2843	R/*	Cga/Tga
DC_B	GENENt_32804	colorectal	APC	GRCh37	5	112173690	112173690	Frame_Shift_Del	DEL	T	T	-	c.2403delT	p.Phe801LeufsTer19	p.F801Lfs*19	ENST00000457016	16/16	2779/11025	2399/8532	800/2843	V/X	gTt/gt
DC_B	GENENt_32804	colorectal	APC	GRCh37	5	112175951	112175952	Frame_Shift_Ins	INS	-	-	A	c.4666dupA	p.Thr1556AsnfsTer3	p.T1556Nfs*3	ENST00000457016	16/16	5040-5041/11025	4660-4661/8532	1554/2843	E/EX	gaa/gAaa
DC_B	GENENt_32804	colorectal	APC	GRCh37	5	112176511	112176511	Frame_Shift_Del	DEL	T	T	-	c.5222delT	p.Phe1741SerfsTer3	p.F1741Sfs*3	ENST00000457016	16/16	5600/11025	5220/8532	1740/2843	P/X	ccT/cc
DC_B	GENENt_32816	colorectal	APC	GRCh37	5	112175512	112175515	Frame_Shift_Del	DEL	TGAA	TGAA	-	c.4221_4224delTGAA	p.Glu1408HisfsTer6	p.E1408Hfs*6	ENST00000457016	16/16	4601-4604/11025	4221-4224/8532	1407-1408/2843	SE/X	agTGAA/ag
DC_B	GENENt_32832	colorectal	APC	GRCh37	5	112151204	112151204	Nonsense_Mutation	SNP	C	C	T	c.847C>T	p.Arg283Ter	p.R283*	ENST00000457016	9/16	1227/11025	847/8532	283/2843	R/*	Cga/Tga
DC_B	GENENt_32832	colorectal	APC	GRCh37	5	112175676	112175677	Frame_Shift_Del	DEL	AG	AG	-	c.4393_4394delAG	p.Ser1465TrpfsTer3	p.S1465Wfs*3	ENST00000457016	16/16	4765-4766/11025	4385-4386/8532	1462/2843	K/X	aAG/a
DC_B	GENENt_32832	colorectal	RNF43	GRCh37	17	56435161	56435161	Frame_Shift_Del	DEL	C	C	-	c.1976delG	p.Gly659ValfsTer41	p.G659Vfs*41	ENST00000584437	8/9	3932/5575	1976/2352	659/783	G/X	gGt/gt
DC_B	GENENt_32838	colorectal	APC	GRCh37	5	112173917	112173917	Nonsense_Mutation	SNP	C	C	T	c.2626C>T	p.Arg876Ter	p.R876*	ENST00000457016	16/16	3006/11025	2626/8532	876/2843	R/*	Cga/Tga
DC_B	GENENt_32838	colorectal	APC	GRCh37	5	112175761	112175761	Frame_Shift_Del	DEL	T	T	-	c.4473delT	p.Phe1491LeufsTer16	p.F1491Lfs*16	ENST00000457016	16/16	4850/11025	4470/8532	1490/2843	H/X	caT/ca
DC_B	GENENt_32860	colorectal	APC	GRCh37	5	112173987	112173987	Frame_Shift_Del	DEL	C	C	-	c.2697delC	p.Ser900LeufsTer16	p.S900Lfs*16	ENST00000457016	16/16	3076/11025	2696/8532	899/2843	T/X	aCc/ac
DC_B	GENENt_32860	colorectal	APC	GRCh37	5	112175529	112175530	Frame_Shift_Ins	INS	-	-	G	c.4240dupG	p.Val1414GlyfsTer9	p.V1414Gfs*9	ENST00000457016	16/16	4618-4619/11025	4238-4239/8532	1413/2843	M/MX	atg/atGg
DC_B	GENENt_32874	colorectal	APC	GRCh37	5	112116586	112116587	Frame_Shift_Ins	INS	-	-	A	c.636dupA	p.Arg213ThrfsTer39	p.R213Tfs*39	ENST00000457016	6/16	1011-1012/11025	631-632/8532	211/2843	E/EX	gaa/gAaa
DC_B	GENENt_32874	colorectal	APC	GRCh37	5	112175347	112175348	Frame_Shift_Ins	INS	-	-	G	c.4057dupG	p.Glu1353GlyfsTer22	p.E1353Gfs*22	ENST00000457016	16/16	4436-4437/11025	4056-4057/8532	1352-1353/2843	-/X	-/G
DC_B	GENENt_32882	colorectal	APC	GRCh37	5	112175390	112175390	Nonsense_Mutation	SNP	C	C	T	c.4099C>T	p.Gln1367Ter	p.Q1367*	ENST00000457016	16/16	4479/11025	4099/8532	1367/2843	Q/*	Cag/Tag
DC_B	GENENt_32882	colorectal	APC	GRCh37	5	112175426	112175426	Nonsense_Mutation	SNP	G	G	T	c.4135G>T	p.Glu1379Ter	p.E1379*	ENST00000457016	16/16	4515/11025	4135/8532	1379/2843	E/*	Gag/Tag
DC_B	GENENt_32908	colorectal	APC	GRCh37	5	112103015	112103015	Nonsense_Mutation	SNP	C	C	A	c.350C>A	p.Ser117Ter	p.S117*	ENST00000457016	4/16	730/11025	350/8532	117/2843	S/*	tCa/tAa
DC_B	GENENt_32908	colorectal	APC	GRCh37	5	112174893	112174893	Nonsense_Mutation	SNP	C	C	A	c.3602C>A	p.Ser1201Ter	p.S1201*	ENST00000457016	16/16	3982/11025	3602/8532	1201/2843	S/*	tCa/tAa
DC_B	GENENt_32916	colorectal	APC	GRCh37	5	112175639	112175639	Nonsense_Mutation	SNP	C	C	T	c.4348C>T	p.Arg1450Ter	p.R1450*	ENST00000457016	16/16	4728/11025	4348/8532	1450/2843	R/*	Cga/Tga
DC_B	GENENt_33299	colorectal	APC	GRCh37	5	112151261	112151261	Nonsense_Mutation	SNP	C	C	T	c.904C>T	p.Arg302Ter	p.R302*	ENST00000457016	9/16	1284/11025	904/8532	302/2843	R/*	Cga/Tga
DC_B	GENENt_33299	colorectal	APC	GRCh37	5	112175216	112175216	Frame_Shift_Del	DEL	G	G	-	c.3925delG	p.Glu1309LysfsTer12	p.E1309Kfs*12	ENST00000457016	16/16	4305/11025	3925/8532	1309/2843	E/X	Gaa/aa
DC_B	GENENt_33313	colorectal	APC	GRCh37	5	112175303	112175303	Nonsense_Mutation	SNP	C	C	T	c.4012C>T	p.Gln1338Ter	p.Q1338*	ENST00000457016	16/16	4392/11025	4012/8532	1338/2843	Q/*	Cag/Tag
DC_B	GENENt_34988	colorectal	APC	GRCh37	5	112175548	112175549	Frame_Shift_Del	DEL	CC	CC	-	c.4259_4260delCC	p.Pro1420GlnfsTer2	p.P1420Qfs*2	ENST00000457016	16/16	4637-4638/11025	4257-4258/8532	1419-1420/2843	SP/SX	agCCcc/agcc
DC_B	GENENt_34989	colorectal	APC	GRCh37	5	112164616	112164616	Nonsense_Mutation	SNP	C	C	T	c.1690C>T	p.Arg564Ter	p.R564*	ENST00000457016	14/16	2070/11025	1690/8532	564/2843	R/*	Cga/Tga
DC_B	GENENt_34989	colorectal	APC	GRCh37	5	112175423	112175423	Nonsense_Mutation	SNP	C	C	T	c.4132C>T	p.Gln1378Ter	p.Q1378*	ENST00000457016	16/16	4512/11025	4132/8532	1378/2843	Q/*	Cag/Tag
DC_B	GENENt_34991	colorectal	APC	GRCh37	5	112175212	112175218	Frame_Shift_Del	DEL	AAAAGAA	AAAAGAA	-	c.3923_3929delAAGAAAA	p.Lys1308ArgfsTer11	p.K1308Rfs*11	ENST00000457016	16/16	4301-4307/11025	3921-3927/8532	1307-1309/2843	IKE/X	atAAAAGAA/at
DC_B	GENENt_34997	colorectal	APC	GRCh37	5	112162891	112162891	Nonsense_Mutation	SNP	C	C	T	c.1495C>T	p.Arg499Ter	p.R499*	ENST00000457016	12/16	1875/11025	1495/8532	499/2843	R/*	Cga/Tga
DC_B	GENENt_34997	colorectal	APC	GRCh37	5	112175594	112175594	Frame_Shift_Del	DEL	A	A	-	c.4303delA	p.Arg1435GlufsTer38	p.R1435Efs*38	ENST00000457016	16/16	4683/11025	4303/8532	1435/2843	R/X	Aga/ga
DC_B	GENENt_34997	colorectal	APC	GRCh37	5	112175944	112175945	Frame_Shift_Del	DEL	AG	AG	-	c.4655_4656delAG	p.Glu1552GlyfsTer6	p.E1552Gfs*6	ENST00000457016	16/16	5033-5034/11025	4653-4654/8532	1551-1552/2843	KE/KX	aaAGag/aaag
DC_B	GENENt_35001	colorectal	APC	GRCh37	5	112175423	112175423	Nonsense_Mutation	SNP	C	C	T	c.4132C>T	p.Gln1378Ter	p.Q1378*	ENST00000457016	16/16	4512/11025	4132/8532	1378/2843	Q/*	Cag/Tag
Val_A	SC00124A	colorectal	RNF43	GRCh37	17	56436026	56436026	Nonsense_Mutation	SNP	G	G	A	c.1111C>T	p.Arg371Ter	p.R371*	ENST00000584437	8/9	3067/5575	1111/2352	371/783	R/*	Cga/Tga
Val_A	SC00125A	colorectal	APC	GRCh37	5	112174152	112174152	Nonsense_Mutation	SNP	T	T	G	c.2861T>G	p.Leu954Ter	p.L954*	ENST00000457016	16/16	3241/11025	2861/8532	954/2843	L/*	tTa/tGa
Val_A	SC00127A	colorectal	APC	GRCh37	5	112116592	112116592	Nonsense_Mutation	SNP	C	C	T	c.637C>T	p.Arg213Ter	p.R213*	ENST00000457016	6/16	1017/11025	637/8532	213/2843	R/*	Cga/Tga
Val_A	SC00127A	colorectal	APC	GRCh37	5	112175207	112175207	Nonsense_Mutation	SNP	G	G	T	c.3916G>T	p.Glu1306Ter	p.E1306*	ENST00000457016	16/16	4296/11025	3916/8532	1306/2843	E/*	Gaa/Taa
Val_A	SC00128A	colorectal	APC	GRCh37	5	112102884	112102884	Splice_Site	SNP	A	A	G	c.221-2A>G		p.X74_splice	ENST00000457016		-/11025	221/8532	74/2843
Val_A	SC00128A	colorectal	APC	GRCh37	5	112174119	112174119	Nonsense_Mutation	SNP	C	C	A	c.2828C>A	p.Ser943Ter	p.S943*	ENST00000457016	16/16	3208/11025	2828/8532	943/2843	S/*	tCa/tAa
Val_A	SC00128A	colorectal	APC	GRCh37	5	112175921	112175921	Nonsense_Mutation	SNP	G	G	T	c.4630G>T	p.Glu1544Ter	p.E1544*	ENST00000457016	16/16	5010/11025	4630/8532	1544/2843	E/*	Gaa/Taa
Val_A	SC00129A	colorectal	APC	GRCh37	5	112175490	112175490	Nonsense_Mutation	SNP	C	C	A	c.4199C>A	p.Ser1400Ter	p.S1400*	ENST00000457016	16/16	4579/11025	4199/8532	1400/2843	S/*	tCg/tAg
Val_A	SC00129A	colorectal	APC	GRCh37	5	112175672	112175672	Nonsense_Mutation	SNP	G	G	T	c.4381G>T	p.Glu1461Ter	p.E1461*	ENST00000457016	16/16	4761/11025	4381/8532	1461/2843	E/*	Gaa/Taa
Val_A	SC00130A	colorectal	APC	GRCh37	5	112175609	112175609	Frame_Shift_Del	DEL	C	C	-	c.4319delC	p.Pro1440HisfsTer33	p.P1440Hfs*33	ENST00000457016	16/16	4698/11025	4318/8532	1440/2843	P/X	Cca/ca
Val_A	SC00130A	colorectal	APC	GRCh37	5	112116592	112116592	Nonsense_Mutation	SNP	C	C	T	c.637C>T	p.Arg213Ter	p.R213*	ENST00000457016	6/16	1017/11025	637/8532	213/2843	R/*	Cga/Tga
Val_A	SC00131A	colorectal	APC	GRCh37	5	112175951	112175952	Frame_Shift_Ins	INS	-	-	A	c.4666dupA	p.Thr1556AsnfsTer3	p.T1556Nfs*3	ENST00000457016	16/16	5040-5041/11025	4660-4661/8532	1554/2843	E/EX	gaa/gAaa
Val_A	SC00131A	colorectal	APC	GRCh37	5	112173704	112173704	Nonsense_Mutation	SNP	C	C	T	c.2413C>T	p.Arg805Ter	p.R805*	ENST00000457016	16/16	2793/11025	2413/8532	805/2843	R/*	Cga/Tga
Val_A	SC00132A	colorectal	APC	GRCh37	5	112175338	112175355	Frame_Shift_Del	DEL	CAAAGCTGTTGAATTTTC	CAAAGCTGTTGAATTTTC	T	c.4047_4064delCAAAGCTGTTGAATTTTCinsT	p.Lys1350PhefsTer19	p.K1350Ffs*19	ENST00000457016	16/16	4426-4444/11025	4046-4064/8532	1349-1355/2843	HKAVEFS/HX	cACAAAGCTGTTGAATTTTCt/cATt
Val_A	SC00133A	colorectal	APC	GRCh37	5	112174406	112174406	Frame_Shift_Del	DEL	G	G	-	c.3116delG	p.Gly1039GlufsTer17	p.G1039Efs*17	ENST00000457016	16/16	3495/11025	3115/8532	1039/2843	G/X	Gga/ga
Val_A	SC00133A	colorectal	APC	GRCh37	5	112175639	112175639	Nonsense_Mutation	SNP	C	C	T	c.4348C>T	p.Arg1450Ter	p.R1450*	ENST00000457016	16/16	4728/11025	4348/8532	1450/2843	R/*	Cga/Tga
Val_A	SC00135A	colorectal	RNF43	GRCh37	17	56440656	56440657	Frame_Shift_Ins	INS	-	-	CT	c.560_561dupAG	p.Leu188SerfsTer2	p.L188Sfs*2	ENST00000584437	4/9	2517-2518/5575	561-562/2352	187-188/783	-/X	-/AG
Val_A	SC00136A	colorectal	APC	GRCh37	5	112175287	112175288	Frame_Shift_Ins	INS	-	-	A	c.3999dupA	p.Ser1334IlefsTer8	p.S1334Ifs*8	ENST00000457016	16/16	4376-4377/11025	3996-3997/8532	1332-1333/2843	-/X	-/A
Val_A	SC00137A	colorectal	APC	GRCh37	5	112162894	112162895	Nonsense_Mutation	INS	-	-	A	c.1499dupA	p.Tyr500Ter	p.Y500*	ENST00000457016	12/16	1878-1879/11025	1498-1499/8532	500/2843	Y/*	tat/tAat
Val_A	SC00140A	colorectal	APC	GRCh37	5	112175207	112175207	Nonsense_Mutation	SNP	G	G	T	c.3916G>T	p.Glu1306Ter	p.E1306*	ENST00000457016	16/16	4296/11025	3916/8532	1306/2843	E/*	Gaa/Taa
Val_A	SC00140A	colorectal	APC	GRCh37	5	112175271	112175271	Nonsense_Mutation	SNP	C	C	A	c.3980C>A	p.Ser1327Ter	p.S1327*	ENST00000457016	16/16	4360/11025	3980/8532	1327/2843	S/*	tCa/tAa
Val_A	SC00141A	colorectal	APC	GRCh37	5	112173704	112173704	Nonsense_Mutation	SNP	C	C	T	c.2413C>T	p.Arg805Ter	p.R805*	ENST00000457016	16/16	2793/11025	2413/8532	805/2843	R/*	Cga/Tga
Val_A	SC00146A	colorectal	APC	GRCh37	5	112175212	112175216	Frame_Shift_Del	DEL	AAAAG	AAAAG	-	c.3927_3931delAAAGA	p.Glu1309AspfsTer4	p.E1309Dfs*4	ENST00000457016	16/16	4301-4305/11025	3921-3925/8532	1307-1309/2843	IKE/IX	atAAAAGaa/ataa
Val_A	SC00146A	colorectal	APC	GRCh37	5	112173704	112173704	Nonsense_Mutation	SNP	C	C	T	c.2413C>T	p.Arg805Ter	p.R805*	ENST00000457016	16/16	2793/11025	2413/8532	805/2843	R/*	Cga/Tga
Val_A	SC00147A	colorectal	APC	GRCh37	5	112175789	112175790	Frame_Shift_Del	DEL	TT	TT	-	c.4500_4501delTT	p.Ser1501LeufsTer12	p.S1501Lfs*12	ENST00000457016	16/16	4878-4879/11025	4498-4499/8532	1500/2843	F/X	TTt/t
Val_A	SC00147A	colorectal	APC	GRCh37	5	112174956	112174956	Nonsense_Mutation	SNP	C	C	A	c.3665C>A	p.Ser1222Ter	p.S1222*	ENST00000457016	16/16	4045/11025	3665/8532	1222/2843	S/*	tCa/tAa
Val_A	SC00148A	colorectal	APC	GRCh37	5	112175639	112175639	Nonsense_Mutation	SNP	C	C	T	c.4348C>T	p.Arg1450Ter	p.R1450*	ENST00000457016	16/16	4728/11025	4348/8532	1450/2843	R/*	Cga/Tga
Val_A	SC00148A	colorectal	APC	GRCh37	5	112155026	112155026	Nonsense_Mutation	SNP	C	C	T	c.1297C>T	p.Gln433Ter	p.Q433*	ENST00000457016	10/16	1677/11025	1297/8532	433/2843	Q/*	Cag/Tag
Val_A	SC00149A	colorectal	APC	GRCh37	5	112173917	112173917	Nonsense_Mutation	SNP	C	C	T	c.2626C>T	p.Arg876Ter	p.R876*	ENST00000457016	16/16	3006/11025	2626/8532	876/2843	R/*	Cga/Tga
Val_A	SC00152A	colorectal	APC	GRCh37	5	112175207	112175207	Nonsense_Mutation	SNP	G	G	T	c.3916G>T	p.Glu1306Ter	p.E1306*	ENST00000457016	16/16	4296/11025	3916/8532	1306/2843	E/*	Gaa/Taa
Val_A	SC00154A	colorectal	APC	GRCh37	5	112175378	112175378	Nonsense_Mutation	SNP	A	A	T	c.4087A>T	p.Lys1363Ter	p.K1363*	ENST00000457016	16/16	4467/11025	4087/8532	1363/2843	K/*	Aaa/Taa
Val_A	SC00155A	colorectal	APC	GRCh37	5	112175212	112175216	Frame_Shift_Del	DEL	AAAAG	AAAAG	-	c.3927_3931delAAAGA	p.Glu1309AspfsTer4	p.E1309Dfs*4	ENST00000457016	16/16	4301-4305/11025	3921-3925/8532	1307-1309/2843	IKE/IX	atAAAAGaa/ataa
Val_A	SC00155A	colorectal	APC	GRCh37	5	112116592	112116592	Nonsense_Mutation	SNP	C	C	T	c.637C>T	p.Arg213Ter	p.R213*	ENST00000457016	6/16	1017/11025	637/8532	213/2843	R/*	Cga/Tga
Val_A	SC00156A	colorectal	APC	GRCh37	5	112116586	112116586	Nonsense_Mutation	SNP	G	G	T	c.631G>T	p.Glu211Ter	p.E211*	ENST00000457016	6/16	1011/11025	631/8532	211/2843	E/*	Gaa/Taa
Val_A	SC00158A	colorectal	APC	GRCh37	5	112175676	112175677	Frame_Shift_Del	DEL	AG	AG	-	c.4393_4394delAG	p.Ser1465TrpfsTer3	p.S1465Wfs*3	ENST00000457016	16/16	4765-4766/11025	4385-4386/8532	1462/2843	K/X	aAG/a
Val_A	SC00158A	colorectal	APC	GRCh37	5	112173917	112173917	Nonsense_Mutation	SNP	C	C	T	c.2626C>T	p.Arg876Ter	p.R876*	ENST00000457016	16/16	3006/11025	2626/8532	876/2843	R/*	Cga/Tga
Val_A	SC00159A	colorectal	APC	GRCh37	5	112175951	112175952	Frame_Shift_Ins	INS	-	-	A	c.4666dupA	p.Thr1556AsnfsTer3	p.T1556Nfs*3	ENST00000457016	16/16	5040-5041/11025	4660-4661/8532	1554/2843	E/EX	gaa/gAaa
Val_A	SC00159A	colorectal	APC	GRCh37	5	112137078	112137078	Nonsense_Mutation	SNP	C	C	T	c.832C>T	p.Gln278Ter	p.Q278*	ENST00000457016	8/16	1212/11025	832/8532	278/2843	Q/*	Cag/Tag
Val_A	SC00159A	colorectal	APC	GRCh37	5	112154780	112154780	Nonsense_Mutation	SNP	G	G	T	c.1051G>T	p.Gly351Ter	p.G351*	ENST00000457016	10/16	1431/11025	1051/8532	351/2843	G/*	Gga/Tga
Val_A	SC00160A	colorectal	APC	GRCh37	5	112175639	112175639	Nonsense_Mutation	SNP	C	C	T	c.4348C>T	p.Arg1450Ter	p.R1450*	ENST00000457016	16/16	4728/11025	4348/8532	1450/2843	R/*	Cga/Tga
Val_A	SC00160A	colorectal	APC	GRCh37	5	112173926	112173926	Nonsense_Mutation	SNP	C	C	T	c.2635C>T	p.Gln879Ter	p.Q879*	ENST00000457016	16/16	3015/11025	2635/8532	879/2843	Q/*	Cag/Tag
Val_A	SC00161A	colorectal	APC	GRCh37	5	112154967	112154968	Frame_Shift_Ins	INS	-	-	A	c.1239dupA	p.Arg414ThrfsTer5	p.R414Tfs*5	ENST00000457016	10/16	1618-1619/11025	1238-1239/8532	413/2843	I/IX	ata/atAa
Val_A	SC00161A	colorectal	APC	GRCh37	5	112175171	112175171	Nonsense_Mutation	SNP	C	C	T	c.3880C>T	p.Gln1294Ter	p.Q1294*	ENST00000457016	16/16	4260/11025	3880/8532	1294/2843	Q/*	Cag/Tag
Val_A	SC00163A	colorectal	APC	GRCh37	5	112175390	112175390	Nonsense_Mutation	SNP	C	C	T	c.4099C>T	p.Gln1367Ter	p.Q1367*	ENST00000457016	16/16	4479/11025	4099/8532	1367/2843	Q/*	Cag/Tag
Val_A	SC00163A	colorectal	APC	GRCh37	5	112162804	112162804	Splice_Site	SNP	G	G	A	c.1409-1G>A		p.X470_splice	ENST00000457016		-/11025	1409/8532	470/2843
Val_A	SC00164A	colorectal	APC	GRCh37	5	112128143	112128143	Nonsense_Mutation	SNP	C	C	T	c.646C>T	p.Arg216Ter	p.R216*	ENST00000457016	7/16	1026/11025	646/8532	216/2843	R/*	Cga/Tga
Val_A	SC00165A	colorectal	APC	GRCh37	5	112175193	112175193	Frame_Shift_Del	DEL	C	C	-	c.3904delC	p.Leu1302CysfsTer3	p.L1302Cfs*3	ENST00000457016	16/16	4282/11025	3902/8532	1301/2843	T/X	aCc/ac
Val_A	SC00169A	colorectal	APC	GRCh37	5	112175181	112175182	Frame_Shift_Ins	INS	-	-	T	c.3892dupT	p.Ser1298PhefsTer3	p.S1298Ffs*3	ENST00000457016	16/16	4270-4271/11025	3890-3891/8532	1297/2843	D/DX	gat/gaTt
Val_A	SC00170A	colorectal	APC	GRCh37	5	112174091	112174094	Frame_Shift_Del	DEL	ACTT	ACTT	-	c.2802_2805delTTAC	p.Tyr935IlefsTer19	p.Y935Ifs*19	ENST00000457016	16/16	3180-3183/11025	2800-2803/8532	934-935/2843	TY/X	ACTTac/ac
Val_A	SC00170A	colorectal	APC	GRCh37	5	112175754	112175760	Frame_Shift_Del	DEL	TATTACA	TATTACA	-	c.4464_4470delATTACAT	p.Leu1488PhefsTer17	p.L1488Ffs*17	ENST00000457016	16/16	4843-4849/11025	4463-4469/8532	1488-1490/2843	LLH/X	tTATTACAt/tt
Val_A	SC00171A	colorectal	APC	GRCh37	5	112175193	112175193	Frame_Shift_Del	DEL	C	C	-	c.3904delC	p.Leu1302CysfsTer3	p.L1302Cfs*3	ENST00000457016	16/16	4282/11025	3902/8532	1301/2843	T/X	aCc/ac
Val_A	SC00171A	colorectal	APC	GRCh37	5	112175100	112175100	Frame_Shift_Del	DEL	G	G	-	c.3809delG	p.Cys1270PhefsTer18	p.C1270Ffs*18	ENST00000457016	16/16	4189/11025	3809/8532	1270/2843	C/X	tGt/tt
Val_A	SC00173A	colorectal	APC	GRCh37	5	112128143	112128143	Nonsense_Mutation	SNP	C	C	T	c.646C>T	p.Arg216Ter	p.R216*	ENST00000457016	7/16	1026/11025	646/8532	216/2843	R/*	Cga/Tga
Val_A	SC00174A	colorectal	APC	GRCh37	5	112116592	112116592	Nonsense_Mutation	SNP	C	C	T	c.637C>T	p.Arg213Ter	p.R213*	ENST00000457016	6/16	1017/11025	637/8532	213/2843	R/*	Cga/Tga
Val_A	SC00174A	colorectal	APC	GRCh37	5	112175480	112175480	Nonsense_Mutation	SNP	G	G	T	c.4189G>T	p.Glu1397Ter	p.E1397*	ENST00000457016	16/16	4569/11025	4189/8532	1397/2843	E/*	Gag/Tag
Val_A	SC00175A	colorectal	CTNNB1	GRCh37	3	41266125	41266125	Missense_Mutation	SNP	C	C	T	c.122C>T	p.Thr41Ile	p.T41I	ENST00000349496	3/15	402/3729	122/2346	41/781	T/I	aCc/aTc
Val_A	SC00176A	colorectal	RNF43	GRCh37	17	56439918	56439919	Frame_Shift_Ins	INS	-	-	G	c.673dupC	p.Arg225ProfsTer34	p.R225Pfs*34	ENST00000584437	5/9	2629-2630/5575	673-674/2352	225/783	R/PX	cgc/cCgc
Val_A	SC00177A	colorectal	APC	GRCh37	5	112111331	112111363	Nonsense_Mutation	DEL	TGCTTCTTGCTGATCTTGACAAAGAAGAAAAGG	TGCTTCTTGCTGATCTTGACAAAGAAGAAAAGG	-	c.428_460delTGCTTCTTGCTGATCTTGACAAAGAAGAAAAGG	p.Leu143_Glu154delinsTer	p.L143_E154delins*	ENST00000457016	5/16	808-840/11025	428-460/8532	143-154/2843	LLLADLDKEEKE/*	tTGCTTCTTGCTGATCTTGACAAAGAAGAAAAGGaa/taa
Val_A	SC00177A	colorectal	APC	GRCh37	5	112175706	112175706	Frame_Shift_Del	DEL	T	T	-	c.4415delT	p.Val1472GlufsTer35	p.V1472Efs*35	ENST00000457016	16/16	4795/11025	4415/8532	1472/2843	V/X	gTa/ga
Val_A	SC00178A	colorectal	APC	GRCh37	5	112175639	112175639	Nonsense_Mutation	SNP	C	C	T	c.4348C>T	p.Arg1450Ter	p.R1450*	ENST00000457016	16/16	4728/11025	4348/8532	1450/2843	R/*	Cga/Tga
Val_A	SC00178A	colorectal	APC	GRCh37	5	112173590	112173590	Nonsense_Mutation	SNP	C	C	T	c.2299C>T	p.Gln767Ter	p.Q767*	ENST00000457016	16/16	2679/11025	2299/8532	767/2843	Q/*	Cag/Tag
Val_A	SC00179A	colorectal	APC	GRCh37	5	112175751	112175752	Frame_Shift_Ins	INS	-	-	T	c.4463dupT	p.Leu1488PhefsTer26	p.L1488Ffs*26	ENST00000457016	16/16	4840-4841/11025	4460-4461/8532	1487/2843	T/TX	act/acTt
Val_A	SC00179A	colorectal	APC	GRCh37	5	112173704	112173704	Nonsense_Mutation	SNP	C	C	T	c.2413C>T	p.Arg805Ter	p.R805*	ENST00000457016	16/16	2793/11025	2413/8532	805/2843	R/*	Cga/Tga
Val_A	SC00180A	colorectal	APC	GRCh37	5	112175530	112175530	Frame_Shift_Del	DEL	G	G	-	c.4240delG	p.Val1414Ter	p.V1414*	ENST00000457016	16/16	4619/11025	4239/8532	1413/2843	M/X	atG/at
Val_A	SC00180A	colorectal	APC	GRCh37	5	112173682	112173682	Frame_Shift_Del	DEL	T	T	-	c.2391delT	p.Asp798IlefsTer22	p.D798Ifs*22	ENST00000457016	16/16	2771/11025	2391/8532	797/2843	G/X	ggT/gg
Val_A	SC00181A	colorectal	APC	GRCh37	5	112175720	112175720	Nonsense_Mutation	SNP	C	C	T	c.4429C>T	p.Gln1477Ter	p.Q1477*	ENST00000457016	16/16	4809/11025	4429/8532	1477/2843	Q/*	Cag/Tag
Val_A	SC00182A	colorectal	APC	GRCh37	5	112116592	112116592	Nonsense_Mutation	SNP	C	C	T	c.637C>T	p.Arg213Ter	p.R213*	ENST00000457016	6/16	1017/11025	637/8532	213/2843	R/*	Cga/Tga
Val_A	SC00184A	colorectal	APC	GRCh37	5	112176796	112176799	Frame_Shift_Del	DEL	AGGA	AGGA	-	c.5507_5510delGAAG	p.Gly1836ValfsTer26	p.G1836Vfs*26	ENST00000457016	16/16	5885-5888/11025	5505-5508/8532	1835-1836/2843	RG/X	agAGGA/ag
Val_A	SC00187A	colorectal	APC	GRCh37	5	112175866	112175869	Frame_Shift_Del	DEL	GCCT	GCCT	-	c.4575_4578delGCCT	p.Met1525IlefsTer39	p.M1525Ifs*39	ENST00000457016	16/16	4954-4958/11025	4574-4578/8532	1525-1526/2843	MP/X	aTGCCT/aT
Val_A	SC00187A	colorectal	APC	GRCh37	5	112173917	112173917	Nonsense_Mutation	SNP	C	C	T	c.2626C>T	p.Arg876Ter	p.R876*	ENST00000457016	16/16	3006/11025	2626/8532	876/2843	R/*	Cga/Tga
Val_A	SC00188A	colorectal	APC	GRCh37	5	112175576	112175576	Nonsense_Mutation	SNP	C	C	T	c.4285C>T	p.Gln1429Ter	p.Q1429*	ENST00000457016	16/16	4665/11025	4285/8532	1429/2843	Q/*	Caa/Taa
Val_A	SC00190A	colorectal	APC	GRCh37	5	112175212	112175216	Frame_Shift_Del	DEL	AAAAG	AAAAG	-	c.3927_3931delAAAGA	p.Glu1309AspfsTer4	p.E1309Dfs*4	ENST00000457016	16/16	4301-4305/11025	3921-3925/8532	1307-1309/2843	IKE/IX	atAAAAGaa/ataa
Val_A	SC00190A	colorectal	APC	GRCh37	5	112128143	112128143	Nonsense_Mutation	SNP	C	C	T	c.646C>T	p.Arg216Ter	p.R216*	ENST00000457016	7/16	1026/11025	646/8532	216/2843	R/*	Cga/Tga
Val_A	SC00191A	colorectal	APC	GRCh37	5	112175903	112175903	Nonsense_Mutation	SNP	G	G	T	c.4612G>T	p.Glu1538Ter	p.E1538*	ENST00000457016	16/16	4992/11025	4612/8532	1538/2843	E/*	Gaa/Taa
Val_A	SC00192A	colorectal	APC	GRCh37	5	112116592	112116592	Nonsense_Mutation	SNP	C	C	T	c.637C>T	p.Arg213Ter	p.R213*	ENST00000457016	6/16	1017/11025	637/8532	213/2843	R/*	Cga/Tga
Val_A	SC00192A	colorectal	APC	GRCh37	5	112175507	112175507	Nonsense_Mutation	SNP	C	C	T	c.4216C>T	p.Gln1406Ter	p.Q1406*	ENST00000457016	16/16	4596/11025	4216/8532	1406/2843	Q/*	Cag/Tag
Val_A	SC00193A	colorectal	APC	GRCh37	5	112175576	112175576	Nonsense_Mutation	SNP	C	C	T	c.4285C>T	p.Gln1429Ter	p.Q1429*	ENST00000457016	16/16	4665/11025	4285/8532	1429/2843	Q/*	Caa/Taa
Val_A	SC00194A	colorectal	APC	GRCh37	5	112116486	112116486	Splice_Site	SNP	G	G	A	c.532-1G>A		p.X178_splice	ENST00000457016		-/11025	532/8532	178/2843
Val_A	SC00195A	colorectal	APC	GRCh37	5	112128143	112128143	Nonsense_Mutation	SNP	C	C	T	c.646C>T	p.Arg216Ter	p.R216*	ENST00000457016	7/16	1026/11025	646/8532	216/2843	R/*	Cga/Tga
Val_A	SC00196A	colorectal	APC	GRCh37	5	112175273	112175273	Nonsense_Mutation	SNP	C	C	T	c.3982C>T	p.Gln1328Ter	p.Q1328*	ENST00000457016	16/16	4362/11025	3982/8532	1328/2843	Q/*	Cag/Tag
Val_A	SC00198A	colorectal	APC	GRCh37	5	112128191	112128191	Nonsense_Mutation	SNP	C	C	T	c.694C>T	p.Arg232Ter	p.R232*	ENST00000457016	7/16	1074/11025	694/8532	232/2843	R/*	Cga/Tga
Val_A	SC00199A	colorectal	APC	GRCh37	5	112175561	112175561	Frame_Shift_Del	DEL	C	C	-	c.4271delC	p.Pro1424GlnfsTer49	p.P1424Qfs*49	ENST00000457016	16/16	4650/11025	4270/8532	1424/2843	P/X	Cca/ca
Val_A	SC00200A	colorectal	RNF43	GRCh37	17	56435161	56435161	Frame_Shift_Del	DEL	C	C	-	c.1976delG	p.Gly659ValfsTer41	p.G659Vfs*41	ENST00000584437	8/9	3932/5575	1976/2352	659/783	G/X	gGt/gt
Val_A	SC00201A	colorectal	APC	GRCh37	5	112151191	112151191	Splice_Site	DEL	G	G	-	c.836delG	p.Gly279ValfsTer14	p.X279_splice	ENST00000457016		-/11025	836/8532	279/2843
Val_A	SC00201A	colorectal	APC	GRCh37	5	112151251	112151252	Frame_Shift_Del	DEL	CT	CT	-	c.896_897delCT	p.Ser299CysfsTer27	p.S299Cfs*27	ENST00000457016	9/16	1274-1275/11025	894-895/8532	298-299/2843	HS/HX	caCTct/cact
Val_A	SC00205A	colorectal	APC	GRCh37	5	112175348	112175348	Nonsense_Mutation	SNP	G	G	T	c.4057G>T	p.Glu1353Ter	p.E1353*	ENST00000457016	16/16	4437/11025	4057/8532	1353/2843	E/*	Gaa/Taa
Val_A	SC00207A	colorectal	APC	GRCh37	5	112175569	112175569	Frame_Shift_Del	DEL	C	C	-	c.4280delC	p.Pro1427LeufsTer46	p.P1427Lfs*46	ENST00000457016	16/16	4658/11025	4278/8532	1426/2843	S/X	agC/ag
Val_A	SC00208A	colorectal	APC	GRCh37	5	112128143	112128143	Nonsense_Mutation	SNP	C	C	T	c.646C>T	p.Arg216Ter	p.R216*	ENST00000457016	7/16	1026/11025	646/8532	216/2843	R/*	Cga/Tga
Val_A	SC00210A	colorectal	APC	GRCh37	5	112175522	112175523	Frame_Shift_Ins	INS	-	-	GTGGAAT	c.4233_4239dupTGGAATG	p.Val1414TrpfsTer11	p.V1414Wfs*11	ENST00000457016	16/16	4611-4612/11025	4231-4232/8532	1411/2843	S/SGMX	agt/aGTGGAATgt
Val_A	SC00212A	colorectal	APC	GRCh37	5	112175592	112175592	Frame_Shift_Del	DEL	G	G	-	c.4301delG	p.Ser1434ThrfsTer39	p.S1434Tfs*39	ENST00000457016	16/16	4681/11025	4301/8532	1434/2843	S/X	aGc/ac
Val_A	SC00212A	colorectal	APC	GRCh37	5	112128143	112128143	Nonsense_Mutation	SNP	C	C	T	c.646C>T	p.Arg216Ter	p.R216*	ENST00000457016	7/16	1026/11025	646/8532	216/2843	R/*	Cga/Tga
Val_A	SC00213A	colorectal	APC	GRCh37	5	112116556	112116556	Nonsense_Mutation	SNP	G	G	T	c.601G>T	p.Glu201Ter	p.E201*	ENST00000457016	6/16	981/11025	601/8532	201/2843	E/*	Gaa/Taa
Val_A	SC00213A	colorectal	APC	GRCh37	5	112137082	112137082	Splice_Site	SNP	T	T	C	c.834+2T>C		p.X278_splice	ENST00000457016		-/11025	834/8532	278/2843
Val_A	SC00214A	colorectal	APC	GRCh37	5	112175951	112175952	Frame_Shift_Ins	INS	-	-	A	c.4666dupA	p.Thr1556AsnfsTer3	p.T1556Nfs*3	ENST00000457016	16/16	5040-5041/11025	4660-4661/8532	1554/2843	E/EX	gaa/gAaa
Val_A	SC00214A	colorectal	APC	GRCh37	5	112128191	112128191	Nonsense_Mutation	SNP	C	C	T	c.694C>T	p.Arg232Ter	p.R232*	ENST00000457016	7/16	1074/11025	694/8532	232/2843	R/*	Cga/Tga
Val_A	SC00215A	colorectal	RNF43	GRCh37	17	56435161	56435161	Frame_Shift_Del	DEL	C	C	-	c.1976delG	p.Gly659ValfsTer41	p.G659Vfs*41	ENST00000584437	8/9	3932/5575	1976/2352	659/783	G/X	gGt/gt
Val_A	SC00216A	colorectal	RNF43	GRCh37	17	56435161	56435161	Frame_Shift_Del	DEL	C	C	-	c.1976delG	p.Gly659ValfsTer41	p.G659Vfs*41	ENST00000584437	8/9	3932/5575	1976/2352	659/783	G/X	gGt/gt
Val_A	SC00216A	colorectal	RNF43	GRCh37	17	56438190	56438199	Frame_Shift_Del	DEL	GAGCTGCAGC	GAGCTGCAGC	-	c.794_803delGCTGCAGCTC	p.Ser265LysfsTer151	p.S265Kfs*151	ENST00000584437	6/9	2750-2759/5575	794-803/2352	265-268/783	SCSS/X	aGCTGCAGCTCa/aa
Val_A	SC00219A	colorectal	APC	GRCh37	5	112175752	112175752	Frame_Shift_Del	DEL	T	T	-	c.4463delT	p.Leu1488TyrfsTer19	p.L1488Yfs*19	ENST00000457016	16/16	4841/11025	4461/8532	1487/2843	T/X	acT/ac
Val_A	SC00219A	colorectal	APC	GRCh37	5	112116592	112116592	Nonsense_Mutation	SNP	C	C	T	c.637C>T	p.Arg213Ter	p.R213*	ENST00000457016	6/16	1017/11025	637/8532	213/2843	R/*	Cga/Tga
Val_A	SC00221A	colorectal	APC	GRCh37	5	112128191	112128191	Nonsense_Mutation	SNP	C	C	T	c.694C>T	p.Arg232Ter	p.R232*	ENST00000457016	7/16	1074/11025	694/8532	232/2843	R/*	Cga/Tga
Val_A	SC00224A	colorectal	APC	GRCh37	5	112176027	112176027	Frame_Shift_Del	DEL	T	T	-	c.4737delT	p.Ile1580PhefsTer70	p.I1580Ffs*70	ENST00000457016	16/16	5116/11025	4736/8532	1579/2843	I/X	aTt/at
Val_A	SC00224A	colorectal	APC	GRCh37	5	112151204	112151204	Nonsense_Mutation	SNP	C	C	T	c.847C>T	p.Arg283Ter	p.R283*	ENST00000457016	9/16	1227/11025	847/8532	283/2843	R/*	Cga/Tga
Val_A	SC00225A	colorectal	APC	GRCh37	5	112128143	112128143	Nonsense_Mutation	SNP	C	C	T	c.646C>T	p.Arg216Ter	p.R216*	ENST00000457016	7/16	1026/11025	646/8532	216/2843	R/*	Cga/Tga
Val_A	SC00226A	colorectal	APC	GRCh37	5	112173500	112173501	Nonsense_Mutation	INS	-	-	A	c.2210dupA	p.Tyr737Ter	p.Y737*	ENST00000457016	16/16	2589-2590/11025	2209-2210/8532	737/2843	Y/*	tac/tAac
Val_A	SC00226A	colorectal	APC	GRCh37	5	112175639	112175639	Nonsense_Mutation	SNP	C	C	T	c.4348C>T	p.Arg1450Ter	p.R1450*	ENST00000457016	16/16	4728/11025	4348/8532	1450/2843	R/*	Cga/Tga
Val_A	SC00226A	colorectal	APC	GRCh37	5	112090657	112090657	Nonsense_Mutation	SNP	C	C	T	c.70C>T	p.Arg24Ter	p.R24*	ENST00000457016	2/16	450/11025	70/8532	24/2843	R/*	Cga/Tga
Val_A	SC00227A	colorectal	APC	GRCh37	5	112174562	112174562	Frame_Shift_Del	DEL	C	C	-	c.3272delC	p.Pro1091HisfsTer35	p.P1091Hfs*35	ENST00000457016	16/16	3651/11025	3271/8532	1091/2843	P/X	Cca/ca
Val_A	SC00228A	colorectal	APC	GRCh37	5	112175765	112175765	Frame_Shift_Del	DEL	G	G	-	c.4474delG	p.Ala1492ProfsTer15	p.A1492Pfs*15	ENST00000457016	16/16	4854/11025	4474/8532	1492/2843	A/X	Gcc/cc
Val_A	SC00228A	colorectal	APC	GRCh37	5	112151204	112151204	Nonsense_Mutation	SNP	C	C	T	c.847C>T	p.Arg283Ter	p.R283*	ENST00000457016	9/16	1227/11025	847/8532	283/2843	R/*	Cga/Tga
Val_A	SC00230A	colorectal	APC	GRCh37	5	112175351	112175352	Frame_Shift_Del	DEL	TT	TT	-	c.4062_4063delTT	p.Ser1355PhefsTer19	p.S1355Ffs*19	ENST00000457016	16/16	4440-4441/11025	4060-4061/8532	1354/2843	F/X	TTt/t
Val_A	SC00234A	colorectal	APC	GRCh37	5	112173882	112173883	Frame_Shift_Del	DEL	AT	AT	-	c.2591_2592delAT	p.His864ProfsTer47	p.H864Pfs*47	ENST00000457016	16/16	2971-2972/11025	2591-2592/8532	864/2843	H/X	cAT/c
Val_A	SC00234A	colorectal	APC	GRCh37	5	112175639	112175639	Nonsense_Mutation	SNP	C	C	T	c.4348C>T	p.Arg1450Ter	p.R1450*	ENST00000457016	16/16	4728/11025	4348/8532	1450/2843	R/*	Cga/Tga
Val_A	SC00235A	colorectal	APC	GRCh37	5	112175951	112175952	Frame_Shift_Ins	INS	-	-	A	c.4666dupA	p.Thr1556AsnfsTer3	p.T1556Nfs*3	ENST00000457016	16/16	5040-5041/11025	4660-4661/8532	1554/2843	E/EX	gaa/gAaa
Val_A	SC00236A	colorectal	APC	GRCh37	5	112173590	112173590	Nonsense_Mutation	SNP	C	C	T	c.2299C>T	p.Gln767Ter	p.Q767*	ENST00000457016	16/16	2679/11025	2299/8532	767/2843	Q/*	Cag/Tag
Val_A	SC00237A	colorectal	APC	GRCh37	5	112175273	112175273	Nonsense_Mutation	SNP	C	C	T	c.3982C>T	p.Gln1328Ter	p.Q1328*	ENST00000457016	16/16	4362/11025	3982/8532	1328/2843	Q/*	Cag/Tag
Val_A	SC00240A	colorectal	APC	GRCh37	5	112154980	112154980	Frame_Shift_Del	DEL	T	T	-	c.1251delT	p.Cys417TrpfsTer37	p.C417Wfs*37	ENST00000457016	10/16	1631/11025	1251/8532	417/2843	C/X	tgT/tg
Val_A	SC00240A	colorectal	APC	GRCh37	5	112175215	112175216	Frame_Shift_Del	DEL	AG	AG	-	c.3925_3926delGA	p.Glu1309LysfsTer5	p.E1309Kfs*5	ENST00000457016	16/16	4304-4305/11025	3924-3925/8532	1308-1309/2843	KE/KX	aaAGaa/aaaa
Val_A	SC00241A	colorectal	APC	GRCh37	5	112175951	112175952	Frame_Shift_Ins	INS	-	-	A	c.4666dupA	p.Thr1556AsnfsTer3	p.T1556Nfs*3	ENST00000457016	16/16	5040-5041/11025	4660-4661/8532	1554/2843	E/EX	gaa/gAaa
Val_A	SC00241A	colorectal	APC	GRCh37	5	112173704	112173704	Nonsense_Mutation	SNP	C	C	T	c.2413C>T	p.Arg805Ter	p.R805*	ENST00000457016	16/16	2793/11025	2413/8532	805/2843	R/*	Cga/Tga
Val_A	SC00243A	colorectal	APC	GRCh37	5	112174201	112174201	Frame_Shift_Del	DEL	T	T	-	c.2910delT	p.Ser970ArgfsTer10	p.S970Rfs*10	ENST00000457016	16/16	3290/11025	2910/8532	970/2843	S/X	agT/ag
Val_A	SC00243A	colorectal	APC	GRCh37	5	112175951	112175952	Frame_Shift_Ins	INS	-	-	A	c.4666dupA	p.Thr1556AsnfsTer3	p.T1556Nfs*3	ENST00000457016	16/16	5040-5041/11025	4660-4661/8532	1554/2843	E/EX	gaa/gAaa
Val_A	SC00245A	colorectal	APC	GRCh37	5	112173917	112173917	Nonsense_Mutation	SNP	C	C	T	c.2626C>T	p.Arg876Ter	p.R876*	ENST00000457016	16/16	3006/11025	2626/8532	876/2843	R/*	Cga/Tga
Val_A	SC00247A	colorectal	APC	GRCh37	5	112173917	112173917	Nonsense_Mutation	SNP	C	C	T	c.2626C>T	p.Arg876Ter	p.R876*	ENST00000457016	16/16	3006/11025	2626/8532	876/2843	R/*	Cga/Tga
Val_A	SC00247A	colorectal	APC	GRCh37	5	112175754	112175754	Nonsense_Mutation	SNP	T	T	A	c.4463T>A	p.Leu1488Ter	p.L1488*	ENST00000457016	16/16	4843/11025	4463/8532	1488/2843	L/*	tTa/tAa
Val_A	SC00253A	colorectal	APC	GRCh37	5	112175246	112175249	Frame_Shift_Del	DEL	CCTG	CCTG	-	c.3955_3958delCCTG	p.Pro1319Ter	p.P1319*	ENST00000457016	16/16	4335-4338/11025	3955-3958/8532	1319-1320/2843	PV/X	CCTGtg/tg
Val_A	SC00254A	colorectal	APC	GRCh37	5	112128191	112128191	Nonsense_Mutation	SNP	C	C	T	c.694C>T	p.Arg232Ter	p.R232*	ENST00000457016	7/16	1074/11025	694/8532	232/2843	R/*	Cga/Tga
Val_A	SC00258A	colorectal	APC	GRCh37	5	112175651	112175651	Frame_Shift_Del	DEL	A	A	-	c.4364delA	p.Asn1455IlefsTer18	p.N1455Ifs*18	ENST00000457016	16/16	4740/11025	4360/8532	1454/2843	K/X	Aaa/aa
Val_A	SC00258A	colorectal	APC	GRCh37	5	112174096	112174096	Nonsense_Mutation	SNP	C	C	A	c.2805C>A	p.Tyr935Ter	p.Y935*	ENST00000457016	16/16	3185/11025	2805/8532	935/2843	Y/*	taC/taA
Val_A	SC00259A	colorectal	APC	GRCh37	5	112175419	112175419	Nonsense_Mutation	SNP	T	T	A	c.4128T>A	p.Tyr1376Ter	p.Y1376*	ENST00000457016	16/16	4508/11025	4128/8532	1376/2843	Y/*	taT/taA
Val_A	SC00260A	colorectal	APC	GRCh37	5	112174936	112174936	Frame_Shift_Del	DEL	T	T	-	c.3645delT	p.Ser1215ArgfsTer50	p.S1215Rfs*50	ENST00000457016	16/16	4025/11025	3645/8532	1215/2843	S/X	agT/ag
Val_A	SC00260A	colorectal	APC	GRCh37	5	112173917	112173917	Nonsense_Mutation	SNP	C	C	T	c.2626C>T	p.Arg876Ter	p.R876*	ENST00000457016	16/16	3006/11025	2626/8532	876/2843	R/*	Cga/Tga
Val_A	SC00261A	colorectal	APC	GRCh37	5	112173956	112173957	Frame_Shift_Del	DEL	AA	AA	-	c.2666_2667delAA	p.Lys889SerfsTer22	p.K889Sfs*22	ENST00000457016	16/16	3045-3046/11025	2665-2666/8532	889/2843	K/X	AAa/a
Val_A	SC00261A	colorectal	APC	GRCh37	5	112176025	112176025	Frame_Shift_Del	DEL	T	T	-	c.4734delT	p.Cys1578Ter	p.C1578*	ENST00000457016	16/16	5114/11025	4734/8532	1578/2843	C/X	tgT/tg
Val_A	SC00262A	colorectal	APC	GRCh37	5	112116577	112116577	Nonsense_Mutation	SNP	C	C	T	c.622C>T	p.Gln208Ter	p.Q208*	ENST00000457016	6/16	1002/11025	622/8532	208/2843	Q/*	Cag/Tag
Val_A	SC00264A	colorectal	APC	GRCh37	5	112163700	112163700	Frame_Shift_Del	DEL	G	G	-	c.1623delG	p.Gln541HisfsTer8	p.Q541Hfs*8	ENST00000457016	13/16	2003/11025	1623/8532	541/2843	Q/X	caG/ca
Val_A	SC00264A	colorectal	APC	GRCh37	5	112175351	112175355	Frame_Shift_Del	DEL	TTTTC	TTTTC	-	c.4062_4066delTTCTT	p.Ser1355ArgfsTer18	p.S1355Rfs*18	ENST00000457016	16/16	4440-4444/11025	4060-4064/8532	1354-1355/2843	FS/X	TTTTCt/t
Val_A	SC00265A	colorectal	APC	GRCh37	5	112175639	112175639	Nonsense_Mutation	SNP	C	C	T	c.4348C>T	p.Arg1450Ter	p.R1450*	ENST00000457016	16/16	4728/11025	4348/8532	1450/2843	R/*	Cga/Tga
Val_A	SC00265A	colorectal	APC	GRCh37	5	112173917	112173917	Nonsense_Mutation	SNP	C	C	T	c.2626C>T	p.Arg876Ter	p.R876*	ENST00000457016	16/16	3006/11025	2626/8532	876/2843	R/*	Cga/Tga
Val_A	SC00266A	colorectal	APC	GRCh37	5	112173599	112173599	Frame_Shift_Del	DEL	T	T	-	c.2308delT	p.Ser770GlnfsTer7	p.S770Qfs*7	ENST00000457016	16/16	2688/11025	2308/8532	770/2843	S/X	Tca/ca
Val_A	SC00266A	colorectal	APC	GRCh37	5	112175513	112175513	Nonsense_Mutation	SNP	G	G	T	c.4222G>T	p.Glu1408Ter	p.E1408*	ENST00000457016	16/16	4602/11025	4222/8532	1408/2843	E/*	Gaa/Taa
Val_A	SC00267A	colorectal	APC	GRCh37	5	112175324	112175324	Nonsense_Mutation	SNP	G	G	T	c.4033G>T	p.Glu1345Ter	p.E1345*	ENST00000457016	16/16	4413/11025	4033/8532	1345/2843	E/*	Gaa/Taa
Val_A	SC00268A	colorectal	APC	GRCh37	5	112162804	112162804	Splice_Site	DEL	G	G	-	c.1412delG	p.Gly471AspfsTer27	p.X471_splice	ENST00000457016		-/11025	1412/8532	471/2843
Val_A	SC00268A	colorectal	APC	GRCh37	5	112175530	112175530	Frame_Shift_Del	DEL	G	G	-	c.4240delG	p.Val1414Ter	p.V1414*	ENST00000457016	16/16	4619/11025	4239/8532	1413/2843	M/X	atG/at
Val_A	SC00270A	colorectal	APC	GRCh37	5	112175171	112175171	Nonsense_Mutation	SNP	C	C	T	c.3880C>T	p.Gln1294Ter	p.Q1294*	ENST00000457016	16/16	4260/11025	3880/8532	1294/2843	Q/*	Cag/Tag
Val_A	SC00271A	colorectal	APC	GRCh37	5	112175676	112175677	Frame_Shift_Del	DEL	AG	AG	-	c.4393_4394delAG	p.Ser1465TrpfsTer3	p.S1465Wfs*3	ENST00000457016	16/16	4765-4766/11025	4385-4386/8532	1462/2843	K/X	aAG/a
Val_A	SC00272A	colorectal	APC	GRCh37	5	112173704	112173704	Nonsense_Mutation	SNP	C	C	T	c.2413C>T	p.Arg805Ter	p.R805*	ENST00000457016	16/16	2793/11025	2413/8532	805/2843	R/*	Cga/Tga
Val_A	SC00272A	colorectal	APC	GRCh37	5	112175513	112175513	Nonsense_Mutation	SNP	G	G	T	c.4222G>T	p.Glu1408Ter	p.E1408*	ENST00000457016	16/16	4602/11025	4222/8532	1408/2843	E/*	Gaa/Taa
Val_A	SC00273A	colorectal	APC	GRCh37	5	112128191	112128191	Nonsense_Mutation	SNP	C	C	T	c.694C>T	p.Arg232Ter	p.R232*	ENST00000457016	7/16	1074/11025	694/8532	232/2843	R/*	Cga/Tga
Val_A	SC00274A	colorectal	APC	GRCh37	5	112128191	112128191	Nonsense_Mutation	SNP	C	C	T	c.694C>T	p.Arg232Ter	p.R232*	ENST00000457016	7/16	1074/11025	694/8532	232/2843	R/*	Cga/Tga
Val_A	SC00274A	colorectal	APC	GRCh37	5	112175303	112175303	Nonsense_Mutation	SNP	C	C	T	c.4012C>T	p.Gln1338Ter	p.Q1338*	ENST00000457016	16/16	4392/11025	4012/8532	1338/2843	Q/*	Cag/Tag
Val_A	SC00274A	colorectal	RNF43	GRCh37	17	56436141	56436141	Nonsense_Mutation	SNP	G	G	T	c.996C>A	p.Tyr332Ter	p.Y332*	ENST00000584437	8/9	2952/5575	996/2352	332/783	Y/*	taC/taA
Val_A	SC00275A	colorectal	APC	GRCh37	5	112173432	112173434	Frame_Shift_Del	DEL	AGC	AGC	TT	c.2141_2143delAGCinsTT	p.Lys714IlefsTer4	p.K714Ifs*4	ENST00000457016	16/16	2521-2523/11025	2141-2143/8532	714-715/2843	KH/IX	aAGCac/aTTac
Val_A	SC00275A	colorectal	APC	GRCh37	5	112175639	112175639	Nonsense_Mutation	SNP	C	C	T	c.4348C>T	p.Arg1450Ter	p.R1450*	ENST00000457016	16/16	4728/11025	4348/8532	1450/2843	R/*	Cga/Tga
Val_A	SC00277A	colorectal	APC	GRCh37	5	112128191	112128191	Nonsense_Mutation	SNP	C	C	T	c.694C>T	p.Arg232Ter	p.R232*	ENST00000457016	7/16	1074/11025	694/8532	232/2843	R/*	Cga/Tga
Val_A	SC00278A	colorectal	APC	GRCh37	5	112175273	112175273	Nonsense_Mutation	SNP	C	C	T	c.3982C>T	p.Gln1328Ter	p.Q1328*	ENST00000457016	16/16	4362/11025	3982/8532	1328/2843	Q/*	Cag/Tag
Val_A	SC00278A	colorectal	APC	GRCh37	5	112178983	112178983	Nonsense_Mutation	SNP	G	G	A	c.7692G>A	p.Trp2564Ter	p.W2564*	ENST00000457016	16/16	8072/11025	7692/8532	2564/2843	W/*	tgG/tgA
Val_A	SC00279A	colorectal	APC	GRCh37	5	112175512	112175512	Frame_Shift_Del	DEL	T	T	-	c.4221delT	p.Ser1407ArgfsTer8	p.S1407Rfs*8	ENST00000457016	16/16	4601/11025	4221/8532	1407/2843	S/X	agT/ag
Val_A	SC00280A	colorectal	APC	GRCh37	5	112174043	112174044	Frame_Shift_Del	DEL	GA	GA	-	c.2756_2757delGA	p.Arg919LysfsTer4	p.R919Kfs*4	ENST00000457016	16/16	3132-3133/11025	2752-2753/8532	918/2843	E/X	GAg/g
Val_A	SC00280A	colorectal	APC	GRCh37	5	112175536	112175536	Frame_Shift_Del	DEL	T	T	-	c.4245delT	p.Ser1415ArgfsTer4	p.S1415Rfs*4	ENST00000457016	16/16	4625/11025	4245/8532	1415/2843	S/X	agT/ag
Val_A	SC00281A	colorectal	APC	GRCh37	5	112175951	112175952	Frame_Shift_Ins	INS	-	-	A	c.4666dupA	p.Thr1556AsnfsTer3	p.T1556Nfs*3	ENST00000457016	16/16	5040-5041/11025	4660-4661/8532	1554/2843	E/EX	gaa/gAaa
Val_A	SC00282A	colorectal	APC	GRCh37	5	112173627	112173628	Frame_Shift_Ins	INS	-	-	A	c.2338dupA	p.Ser780LysfsTer8	p.S780Kfs*8	ENST00000457016	16/16	2716-2717/11025	2336-2337/8532	779/2843	L/LX	tta/ttAa
Val_A	SC00282A	colorectal	APC	GRCh37	5	112175672	112175672	Nonsense_Mutation	SNP	G	G	T	c.4381G>T	p.Glu1461Ter	p.E1461*	ENST00000457016	16/16	4761/11025	4381/8532	1461/2843	E/*	Gaa/Taa
Val_A	SC00283A	colorectal	APC	GRCh37	5	112175639	112175639	Nonsense_Mutation	SNP	C	C	T	c.4348C>T	p.Arg1450Ter	p.R1450*	ENST00000457016	16/16	4728/11025	4348/8532	1450/2843	R/*	Cga/Tga
Val_A	SC00283A	colorectal	APC	GRCh37	5	112174631	112174631	Nonsense_Mutation	SNP	C	C	T	c.3340C>T	p.Arg1114Ter	p.R1114*	ENST00000457016	16/16	3720/11025	3340/8532	1114/2843	R/*	Cga/Tga
Val_A	SC00284A	colorectal	APC	GRCh37	5	112175480	112175481	Frame_Shift_Del	DEL	GA	GA	-	c.4192_4193delAG	p.Arg1399PhefsTer9	p.R1399Ffs*9	ENST00000457016	16/16	4569-4570/11025	4189-4190/8532	1397/2843	E/X	GAg/g
Val_A	SC00284A	colorectal	APC	GRCh37	5	112173917	112173917	Nonsense_Mutation	SNP	C	C	T	c.2626C>T	p.Arg876Ter	p.R876*	ENST00000457016	16/16	3006/11025	2626/8532	876/2843	R/*	Cga/Tga
Val_A	SC00286A	colorectal	APC	GRCh37	5	112163652	112163652	Nonsense_Mutation	SNP	C	C	A	c.1575C>A	p.Cys525Ter	p.C525*	ENST00000457016	13/16	1955/11025	1575/8532	525/2843	C/*	tgC/tgA
Val_A	SC00286A	colorectal	APC	GRCh37	5	112175255	112175255	Nonsense_Mutation	SNP	G	G	T	c.3964G>T	p.Glu1322Ter	p.E1322*	ENST00000457016	16/16	4344/11025	3964/8532	1322/2843	E/*	Gaa/Taa
Val_A	SC00287A	colorectal	APC	GRCh37	5	112174723	112174723	Frame_Shift_Del	DEL	T	T	-	c.3432delT	p.Ser1144ArgfsTer21	p.S1144Rfs*21	ENST00000457016	16/16	3812/11025	3432/8532	1144/2843	S/X	agT/ag
Val_A	SC00287A	colorectal	APC	GRCh37	5	112175438	112175439	Frame_Shift_Del	DEL	AT	AT	-	c.4147_4148delAT	p.Met1383ValfsTer2	p.M1383Vfs*2	ENST00000457016	16/16	4527-4528/11025	4147-4148/8532	1383/2843	M/X	ATg/g
Val_A	SC00288A	colorectal	APC	GRCh37	5	112175240	112175240	Nonsense_Mutation	SNP	G	G	T	c.3949G>T	p.Glu1317Ter	p.E1317*	ENST00000457016	16/16	4329/11025	3949/8532	1317/2843	E/*	Gaa/Taa
Val_A	SC00289A	colorectal	APC	GRCh37	5	112111435	112111435	Splice_Site	SNP	G	G	T	c.531+1G>T		p.X177_splice	ENST00000457016		-/11025	531/8532	177/2843
Val_A	SC00290A	colorectal	APC	GRCh37	5	112116491	112116491	Frame_Shift_Del	DEL	C	C	-	c.537delC	p.Leu180TyrfsTer5	p.L180Yfs*5	ENST00000457016	6/16	916/11025	536/8532	179/2843	S/X	tCc/tc
Val_A	SC00290A	colorectal	APC	GRCh37	5	112175969	112175969	Nonsense_Mutation	SNP	G	G	T	c.4678G>T	p.Glu1560Ter	p.E1560*	ENST00000457016	16/16	5058/11025	4678/8532	1560/2843	E/*	Gaa/Taa
Val_A	SC00291A	colorectal	APC	GRCh37	5	112175951	112175952	Frame_Shift_Ins	INS	-	-	A	c.4666dupA	p.Thr1556AsnfsTer3	p.T1556Nfs*3	ENST00000457016	16/16	5040-5041/11025	4660-4661/8532	1554/2843	E/EX	gaa/gAaa
Val_A	SC00291A	colorectal	APC	GRCh37	5	112173704	112173704	Nonsense_Mutation	SNP	C	C	T	c.2413C>T	p.Arg805Ter	p.R805*	ENST00000457016	16/16	2793/11025	2413/8532	805/2843	R/*	Cga/Tga
Val_A	SC00292A	colorectal	APC	GRCh37	5	112174916	112174916	Nonsense_Mutation	SNP	G	G	T	c.3625G>T	p.Glu1209Ter	p.E1209*	ENST00000457016	16/16	4005/11025	3625/8532	1209/2843	E/*	Gaa/Taa
Val_A	SC00293A	colorectal	APC	GRCh37	5	112128143	112128143	Nonsense_Mutation	SNP	C	C	T	c.646C>T	p.Arg216Ter	p.R216*	ENST00000457016	7/16	1026/11025	646/8532	216/2843	R/*	Cga/Tga
Val_A	SC00294A	colorectal	APC	GRCh37	5	112175531	112175532	Frame_Shift_Ins	INS	-	-	T	c.4241dupT	p.Ser1415LysfsTer8	p.S1415Kfs*8	ENST00000457016	16/16	4620-4621/11025	4240-4241/8532	1414/2843	V/VX	gta/gTta
Val_A	SC00294A	colorectal	APC	GRCh37	5	112173965	112173965	Nonsense_Mutation	SNP	G	G	T	c.2674G>T	p.Glu892Ter	p.E892*	ENST00000457016	16/16	3054/11025	2674/8532	892/2843	E/*	Gaa/Taa
Val_A	SC00296A	colorectal	APC	GRCh37	5	112116592	112116592	Nonsense_Mutation	SNP	C	C	T	c.637C>T	p.Arg213Ter	p.R213*	ENST00000457016	6/16	1017/11025	637/8532	213/2843	R/*	Cga/Tga
Val_A	SC00297A	colorectal	APC	GRCh37	5	112128143	112128143	Nonsense_Mutation	SNP	C	C	T	c.646C>T	p.Arg216Ter	p.R216*	ENST00000457016	7/16	1026/11025	646/8532	216/2843	R/*	Cga/Tga
Val_A	SC00299A	colorectal	APC	GRCh37	5	112175255	112175255	Nonsense_Mutation	SNP	G	G	T	c.3964G>T	p.Glu1322Ter	p.E1322*	ENST00000457016	16/16	4344/11025	3964/8532	1322/2843	E/*	Gaa/Taa
Val_A	SC00299A	colorectal	RNF43	GRCh37	17	56492799	56492800	Frame_Shift_Ins	INS	-	-	T	c.139dupA	p.Ile47AsnfsTer28	p.I47Nfs*28	ENST00000584437	1/9	2095-2096/5575	139-140/2352	47/783	I/NX	att/aAtt
Val_A	SC00300A	colorectal	APC	GRCh37	5	112174682	112174682	Nonsense_Mutation	SNP	C	C	T	c.3391C>T	p.Gln1131Ter	p.Q1131*	ENST00000457016	16/16	3771/11025	3391/8532	1131/2843	Q/*	Caa/Taa
Val_A	SC00301A	colorectal	APC	GRCh37	5	112177300	112177301	Frame_Shift_Ins	INS	-	-	GC	c.6010_6011dupGC	p.Ser2005HisfsTer40	p.S2005Hfs*40	ENST00000457016	16/16	6389-6390/11025	6009-6010/8532	2003-2004/2843	-/X	-/GC
Val_A	SC00303A	colorectal	APC	GRCh37	5	112175639	112175639	Nonsense_Mutation	SNP	C	C	T	c.4348C>T	p.Arg1450Ter	p.R1450*	ENST00000457016	16/16	4728/11025	4348/8532	1450/2843	R/*	Cga/Tga
Val_A	SC00303A	colorectal	APC	GRCh37	5	112173995	112173995	Nonsense_Mutation	SNP	G	G	T	c.2704G>T	p.Glu902Ter	p.E902*	ENST00000457016	16/16	3084/11025	2704/8532	902/2843	E/*	Gaa/Taa
Val_A	SC00309A	colorectal	APC	GRCh37	5	112175759	112175759	Frame_Shift_Del	DEL	C	C	-	c.4468delC	p.His1490IlefsTer17	p.H1490Ifs*17	ENST00000457016	16/16	4848/11025	4468/8532	1490/2843	H/X	Cat/at
Val_A	SC00309A	colorectal	APC	GRCh37	5	112173578	112173578	Nonsense_Mutation	SNP	G	G	T	c.2287G>T	p.Glu763Ter	p.E763*	ENST00000457016	16/16	2667/11025	2287/8532	763/2843	E/*	Gaa/Taa
Val_A	SC00310A	colorectal	APC	GRCh37	5	112175212	112175216	Frame_Shift_Del	DEL	AAAAG	AAAAG	-	c.3927_3931delAAAGA	p.Glu1309AspfsTer4	p.E1309Dfs*4	ENST00000457016	16/16	4301-4305/11025	3921-3925/8532	1307-1309/2843	IKE/IX	atAAAAGaa/ataa
Val_A	SC00311A	colorectal	APC	GRCh37	5	112162803	112162804	Splice_Site	INS	-	-	G	c.1412dupG	p.Leu472ThrfsTer13	p.X471_splice	ENST00000457016		-/11025	1412/8532	471/2843
Val_A	SC00311A	colorectal	APC	GRCh37	5	112175639	112175639	Nonsense_Mutation	SNP	C	C	T	c.4348C>T	p.Arg1450Ter	p.R1450*	ENST00000457016	16/16	4728/11025	4348/8532	1450/2843	R/*	Cga/Tga
Val_A	SC00312A	colorectal	APC	GRCh37	5	112128191	112128191	Nonsense_Mutation	SNP	C	C	T	c.694C>T	p.Arg232Ter	p.R232*	ENST00000457016	7/16	1074/11025	694/8532	232/2843	R/*	Cga/Tga
Val_A	SC00313A	colorectal	APC	GRCh37	5	112175639	112175639	Nonsense_Mutation	SNP	C	C	T	c.4348C>T	p.Arg1450Ter	p.R1450*	ENST00000457016	16/16	4728/11025	4348/8532	1450/2843	R/*	Cga/Tga
Val_A	SC00313A	colorectal	APC	GRCh37	5	112173704	112173704	Nonsense_Mutation	SNP	C	C	T	c.2413C>T	p.Arg805Ter	p.R805*	ENST00000457016	16/16	2793/11025	2413/8532	805/2843	R/*	Cga/Tga
Val_A	SC00314A	colorectal	APC	GRCh37	5	112128207	112128207	Frame_Shift_Del	DEL	C	C	-	c.712delC	p.Gln238LysfsTer55	p.Q238Kfs*55	ENST00000457016	7/16	1090/11025	710/8532	237/2843	S/X	tCc/tc
Val_A	SC00315A	colorectal	APC	GRCh37	5	112175350	112175351	Frame_Shift_Ins	INS	-	-	T	c.4063dupT	p.Ser1355PhefsTer20	p.S1355Ffs*20	ENST00000457016	16/16	4439-4440/11025	4059-4060/8532	1353-1354/2843	-/X	-/T
Val_A	SC00316A	colorectal	APC	GRCh37	5	112175147	112175147	Nonsense_Mutation	SNP	G	G	T	c.3856G>T	p.Glu1286Ter	p.E1286*	ENST00000457016	16/16	4236/11025	3856/8532	1286/2843	E/*	Gaa/Taa
Val_A	SC00318A	colorectal	APC	GRCh37	5	112175752	112175755	Frame_Shift_Del	DEL	TTTA	TTTA	-	c.4463_4466delTATT	p.Leu1488TyrfsTer18	p.L1488Yfs*18	ENST00000457016	16/16	4841-4844/11025	4461-4464/8532	1487-1488/2843	TL/X	acTTTA/ac
Val_A	SC00319A	colorectal	APC	GRCh37	5	112174878	112174878	Nonsense_Mutation	SNP	C	C	G	c.3587C>G	p.Ser1196Ter	p.S1196*	ENST00000457016	16/16	3967/11025	3587/8532	1196/2843	S/*	tCa/tGa
Val_A	SC00319A	colorectal	APC	GRCh37	5	112175390	112175390	Nonsense_Mutation	SNP	C	C	T	c.4099C>T	p.Gln1367Ter	p.Q1367*	ENST00000457016	16/16	4479/11025	4099/8532	1367/2843	Q/*	Cag/Tag
Val_A	SC00320A	colorectal	APC	GRCh37	5	112175676	112175677	Frame_Shift_Del	DEL	AG	AG	-	c.4393_4394delAG	p.Ser1465TrpfsTer3	p.S1465Wfs*3	ENST00000457016	16/16	4765-4766/11025	4385-4386/8532	1462/2843	K/X	aAG/a
Val_A	SC00320A	colorectal	APC	GRCh37	5	112175639	112175639	Nonsense_Mutation	SNP	C	C	T	c.4348C>T	p.Arg1450Ter	p.R1450*	ENST00000457016	16/16	4728/11025	4348/8532	1450/2843	R/*	Cga/Tga
Val_A	SC00321A	colorectal	APC	GRCh37	5	112174410	112174410	Frame_Shift_Del	DEL	G	G	-	c.3120delG	p.Arg1040SerfsTer16	p.R1040Sfs*16	ENST00000457016	16/16	3499/11025	3119/8532	1040/2843	R/X	aGg/ag
Val_A	SC00322A	colorectal	RNF43	GRCh37	17	56492814	56492815	Frame_Shift_Ins	INS	-	-	CTGAT	c.120_124dupATCAG	p.Ala42AspfsTer11	p.A42Dfs*11	ENST00000584437	1/9	2080-2081/5575	124-125/2352	42/783	A/DQX	gca/gATCAGca
Val_A	SC00323A	colorectal	APC	GRCh37	5	112175354	112175355	Frame_Shift_Del	DEL	TC	TC	-	c.4064_4065delCT	p.Ser1355PhefsTer19	p.S1355Ffs*19	ENST00000457016	16/16	4443-4444/11025	4063-4064/8532	1355/2843	S/X	TCt/t
Val_A	SC00325A	colorectal	APC	GRCh37	5	112175221	112175224	Frame_Shift_Del	DEL	GATT	GATT	-	c.3931_3934delATTG	p.Ile1311GlufsTer9	p.I1311Efs*9	ENST00000457016	16/16	4310-4313/11025	3930-3933/8532	1310-1311/2843	KI/X	aaGATT/aa
Val_A	SC00325A	colorectal	APC	GRCh37	5	112175276	112175276	Frame_Shift_Del	DEL	C	C	-	c.3985delC	p.His1329ThrfsTer86	p.H1329Tfs*86	ENST00000457016	16/16	4365/11025	3985/8532	1329/2843	H/X	Cac/ac
Val_A	SC00326A	colorectal	APC	GRCh37	5	112174583	112174584	Frame_Shift_Del	DEL	TG	TG	-	c.3295_3296delGT	p.Val1099PhefsTer19	p.V1099Ffs*19	ENST00000457016	16/16	3672-3673/11025	3292-3293/8532	1098/2843	C/X	TGt/t
Val_A	SC00327A	colorectal	APC	GRCh37	5	112164551	112164551	Splice_Site	SNP	A	A	T	c.1627-2A>T		p.X543_splice	ENST00000457016		-/11025	1627/8532	543/2843
Val_A	SC00327A	colorectal	APC	GRCh37	5	112164670	112164670	Splice_Site	SNP	G	G	A	c.1743+1G>A		p.X581_splice	ENST00000457016		-/11025	1743/8532	581/2843
Val_A	SC00327A	colorectal	CTNNB1	GRCh37	3	41266136	41266136	Missense_Mutation	SNP	T	T	C	c.133T>C	p.Ser45Pro	p.S45P	ENST00000349496	3/15	413/3729	133/2346	45/781	S/P	Tct/Cct
Val_A	SC00328A	colorectal	APC	GRCh37	5	112174163	112174185	Frame_Shift_Del	DEL	AGATCTTCAAATGATAGTTTAAA	AGATCTTCAAATGATAGTTTAAA	-	c.2872_2894delAGATCTTCAAATGATAGTTTAAA	p.Arg958Ter	p.R958*	ENST00000457016	16/16	3252-3274/11025	2872-2894/8532	958-965/2843	RSSNDSLN/X	AGATCTTCAAATGATAGTTTAAAt/t
Val_A	SC00328A	colorectal	APC	GRCh37	5	112175735	112175750	Frame_Shift_Del	DEL	CTTCCAGATGCTGATA	CTTCCAGATGCTGATA	-	c.4447_4462delCCAGATGCTGATACTT	p.Pro1483TyrfsTer19	p.P1483Yfs*19	ENST00000457016	16/16	4824-4839/11025	4444-4459/8532	1482-1487/2843	LPDADT/X	CTTCCAGATGCTGATAct/ct
Val_A	SC00329A	colorectal	APC	GRCh37	5	112175676	112175677	Frame_Shift_Del	DEL	AG	AG	-	c.4393_4394delAG	p.Ser1465TrpfsTer3	p.S1465Wfs*3	ENST00000457016	16/16	4765-4766/11025	4385-4386/8532	1462/2843	K/X	aAG/a
Val_A	SC00329A	colorectal	APC	GRCh37	5	112173917	112173917	Nonsense_Mutation	SNP	C	C	T	c.2626C>T	p.Arg876Ter	p.R876*	ENST00000457016	16/16	3006/11025	2626/8532	876/2843	R/*	Cga/Tga
Val_A	SC00330A	colorectal	APC	GRCh37	5	112175198	112175198	Nonsense_Mutation	SNP	C	C	T	c.3907C>T	p.Gln1303Ter	p.Q1303*	ENST00000457016	16/16	4287/11025	3907/8532	1303/2843	Q/*	Caa/Taa
Val_A	SC00332A	colorectal	APC	GRCh37	5	112175530	112175530	Frame_Shift_Del	DEL	G	G	-	c.4240delG	p.Val1414Ter	p.V1414*	ENST00000457016	16/16	4619/11025	4239/8532	1413/2843	M/X	atG/at
Val_A	SC00332A	colorectal	APC	GRCh37	5	112174266	112174267	Frame_Shift_Ins	INS	-	-	T	c.2976dupT	p.Lys993Ter	p.K993*	ENST00000457016	16/16	3355-3356/11025	2975-2976/8532	992/2843	S/SX	agt/agTt
Val_A	SC00333A	colorectal	APC	GRCh37	5	112116592	112116592	Nonsense_Mutation	SNP	C	C	T	c.637C>T	p.Arg213Ter	p.R213*	ENST00000457016	6/16	1017/11025	637/8532	213/2843	R/*	Cga/Tga
Val_A	SC00333A	colorectal	APC	GRCh37	5	112175303	112175303	Nonsense_Mutation	SNP	C	C	T	c.4012C>T	p.Gln1338Ter	p.Q1338*	ENST00000457016	16/16	4392/11025	4012/8532	1338/2843	Q/*	Cag/Tag
Val_A	SC00334A	colorectal	APC	GRCh37	5	112175951	112175952	Frame_Shift_Ins	INS	-	-	A	c.4666dupA	p.Thr1556AsnfsTer3	p.T1556Nfs*3	ENST00000457016	16/16	5040-5041/11025	4660-4661/8532	1554/2843	E/EX	gaa/gAaa
Val_A	SC00334A	colorectal	APC	GRCh37	5	112175639	112175639	Nonsense_Mutation	SNP	C	C	T	c.4348C>T	p.Arg1450Ter	p.R1450*	ENST00000457016	16/16	4728/11025	4348/8532	1450/2843	R/*	Cga/Tga
Val_A	SC00334A	colorectal	RNF43	GRCh37	17	56435161	56435161	Frame_Shift_Del	DEL	C	C	-	c.1976delG	p.Gly659ValfsTer41	p.G659Vfs*41	ENST00000584437	8/9	3932/5575	1976/2352	659/783	G/X	gGt/gt
Val_A	SC00336A	colorectal	APC	GRCh37	5	112175136	112175136	Nonsense_Mutation	SNP	C	C	A	c.3845C>A	p.Ser1282Ter	p.S1282*	ENST00000457016	16/16	4225/11025	3845/8532	1282/2843	S/*	tCa/tAa
Val_A	SC00337A	colorectal	APC	GRCh37	5	112174835	112174835	Nonsense_Mutation	SNP	A	A	T	c.3544A>T	p.Lys1182Ter	p.K1182*	ENST00000457016	16/16	3924/11025	3544/8532	1182/2843	K/*	Aaa/Taa
Val_A	SC00338A	colorectal	APC	GRCh37	5	112175651	112175651	Frame_Shift_Del	DEL	A	A	-	c.4364delA	p.Asn1455IlefsTer18	p.N1455Ifs*18	ENST00000457016	16/16	4740/11025	4360/8532	1454/2843	K/X	Aaa/aa
Val_A	SC00338A	colorectal	APC	GRCh37	5	112174094	112174095	Nonsense_Mutation	INS	-	-	A	c.2804dupA	p.Tyr935Ter	p.Y935*	ENST00000457016	16/16	3183-3184/11025	2803-2804/8532	935/2843	Y/*	tac/tAac
Val_A	SC00339A	colorectal	APC	GRCh37	5	112175752	112175752	Frame_Shift_Del	DEL	T	T	-	c.4463delT	p.Leu1488TyrfsTer19	p.L1488Yfs*19	ENST00000457016	16/16	4841/11025	4461/8532	1487/2843	T/X	acT/ac
Val_A	SC00339A	colorectal	APC	GRCh37	5	112162891	112162891	Nonsense_Mutation	SNP	C	C	T	c.1495C>T	p.Arg499Ter	p.R499*	ENST00000457016	12/16	1875/11025	1495/8532	499/2843	R/*	Cga/Tga
Val_A	SC00340A	colorectal	APC	GRCh37	5	112116592	112116592	Nonsense_Mutation	SNP	C	C	T	c.637C>T	p.Arg213Ter	p.R213*	ENST00000457016	6/16	1017/11025	637/8532	213/2843	R/*	Cga/Tga
Val_A	SC00341A	colorectal	APC	GRCh37	5	112173263	112173263	Nonsense_Mutation	SNP	G	G	T	c.1972G>T	p.Glu658Ter	p.E658*	ENST00000457016	16/16	2352/11025	1972/8532	658/2843	E/*	Gag/Tag
Val_A	SC00341A	colorectal	APC	GRCh37	5	112175328	112175328	Nonsense_Mutation	SNP	C	C	G	c.4037C>G	p.Ser1346Ter	p.S1346*	ENST00000457016	16/16	4417/11025	4037/8532	1346/2843	S/*	tCa/tGa
Val_A	SC00342A	colorectal	APC	GRCh37	5	112174631	112174631	Nonsense_Mutation	SNP	C	C	T	c.3340C>T	p.Arg1114Ter	p.R1114*	ENST00000457016	16/16	3720/11025	3340/8532	1114/2843	R/*	Cga/Tga
Val_A	SC00342A	colorectal	APC	GRCh37	5	112175162	112175162	Nonsense_Mutation	SNP	C	C	T	c.3871C>T	p.Gln1291Ter	p.Q1291*	ENST00000457016	16/16	4251/11025	3871/8532	1291/2843	Q/*	Cag/Tag
Val_A	SC00343A	colorectal	APC	GRCh37	5	112175842	112175843	Frame_Shift_Ins	INS	-	-	A	c.4554dupA	p.Asp1519ArgfsTer14	p.D1519Rfs*14	ENST00000457016	16/16	4931-4932/11025	4551-4552/8532	1517-1518/2843	-/X	-/A
Val_A	SC00344A	colorectal	APC	GRCh37	5	112154935	112154935	Frame_Shift_Del	DEL	T	T	-	c.1206delT	p.Glu403LysfsTer51	p.E403Kfs*51	ENST00000457016	10/16	1586/11025	1206/8532	402/2843	R/X	cgT/cg
Val_A	SC00345A	colorectal	APC	GRCh37	5	112174602	112174602	Nonsense_Mutation	SNP	C	C	G	c.3311C>G	p.Ser1104Ter	p.S1104*	ENST00000457016	16/16	3691/11025	3311/8532	1104/2843	S/*	tCa/tGa
Val_A	SC00345A	colorectal	APC	GRCh37	5	112175282	112175282	Nonsense_Mutation	SNP	A	A	T	c.3991A>T	p.Arg1331Ter	p.R1331*	ENST00000457016	16/16	4371/11025	3991/8532	1331/2843	R/*	Aga/Tga
Val_A	SC00346A	colorectal	APC	GRCh37	5	112128191	112128191	Nonsense_Mutation	SNP	C	C	T	c.694C>T	p.Arg232Ter	p.R232*	ENST00000457016	7/16	1074/11025	694/8532	232/2843	R/*	Cga/Tga
Val_A	SC00346A	colorectal	APC	GRCh37	5	112175358	112175358	Nonsense_Mutation	SNP	C	C	G	c.4067C>G	p.Ser1356Ter	p.S1356*	ENST00000457016	16/16	4447/11025	4067/8532	1356/2843	S/*	tCa/tGa
Val_A	SC00350A	colorectal	APC	GRCh37	5	112175639	112175639	Nonsense_Mutation	SNP	C	C	T	c.4348C>T	p.Arg1450Ter	p.R1450*	ENST00000457016	16/16	4728/11025	4348/8532	1450/2843	R/*	Cga/Tga
Val_A	SC00350A	colorectal	APC	GRCh37	5	112173995	112173995	Nonsense_Mutation	SNP	G	G	T	c.2704G>T	p.Glu902Ter	p.E902*	ENST00000457016	16/16	3084/11025	2704/8532	902/2843	E/*	Gaa/Taa
Val_A	SC00354A	colorectal	APC	GRCh37	5	112175212	112175216	Frame_Shift_Del	DEL	AAAAG	AAAAG	-	c.3927_3931delAAAGA	p.Glu1309AspfsTer4	p.E1309Dfs*4	ENST00000457016	16/16	4301-4305/11025	3921-3925/8532	1307-1309/2843	IKE/IX	atAAAAGaa/ataa
Val_A	SC00355A	colorectal	RNF43	GRCh37	17	56435161	56435161	Frame_Shift_Del	DEL	C	C	-	c.1976delG	p.Gly659ValfsTer41	p.G659Vfs*41	ENST00000584437	8/9	3932/5575	1976/2352	659/783	G/X	gGt/gt
Val_A	SC00355A	colorectal	RNF43	GRCh37	17	56435700	56435701	Frame_Shift_Del	DEL	CA	CA	-	c.1436_1437delTG	p.Val479GlyfsTer25	p.V479Gfs*25	ENST00000584437	8/9	3392-3393/5575	1436-1437/2352	479/783	V/X	gTG/g
Val_A	SC00355A	colorectal	RNF43	GRCh37	17	56492745	56492745	Frame_Shift_Del	DEL	A	A	-	c.194delT	p.Leu65TrpfsTer11	p.L65Wfs*11	ENST00000584437	1/9	2150/5575	194/2352	65/783	L/X	tTg/tg
Val_A	SC00355A	colorectal	RNF43	GRCh37	17	56435160	56435161	Frame_Shift_Ins	INS	-	-	C	c.1976dupG	p.Pro660SerfsTer87	p.P660Sfs*87	ENST00000584437	8/9	3932-3933/5575	1976-1977/2352	659/783	G/GX	ggt/ggGt
Val_A	SC00356A	colorectal	APC	GRCh37	5	112175951	112175952	Frame_Shift_Ins	INS	-	-	A	c.4666dupA	p.Thr1556AsnfsTer3	p.T1556Nfs*3	ENST00000457016	16/16	5040-5041/11025	4660-4661/8532	1554/2843	E/EX	gaa/gAaa
Val_A	SC00356A	colorectal	APC	GRCh37	5	112174835	112174835	Nonsense_Mutation	SNP	A	A	T	c.3544A>T	p.Lys1182Ter	p.K1182*	ENST00000457016	16/16	3924/11025	3544/8532	1182/2843	K/*	Aaa/Taa
Val_A	SC00358A	colorectal	APC	GRCh37	5	112175770	112175770	Frame_Shift_Del	DEL	G	G	-	c.4480delG	p.Glu1494LysfsTer13	p.E1494Kfs*13	ENST00000457016	16/16	4859/11025	4479/8532	1493/2843	T/X	acG/ac
Val_A	SC00358A	colorectal	APC	GRCh37	5	112174003	112174004	Frame_Shift_Ins	INS	-	-	AG	c.2713_2714dupAG	p.Ser905ArgfsTer12	p.S905Rfs*12	ENST00000457016	16/16	3092-3093/11025	2712-2713/8532	904-905/2843	-/X	-/AG
Val_A	SC00358A	colorectal	RNF43	GRCh37	17	56435189	56435189	Nonsense_Mutation	SNP	G	G	A	c.1948C>T	p.Arg650Ter	p.R650*	ENST00000584437	8/9	3904/5575	1948/2352	650/783	R/*	Cga/Tga
Val_A	SC00359A	colorectal	APC	GRCh37	5	112162891	112162891	Nonsense_Mutation	SNP	C	C	T	c.1495C>T	p.Arg499Ter	p.R499*	ENST00000457016	12/16	1875/11025	1495/8532	499/2843	R/*	Cga/Tga
Val_A	SC00359A	colorectal	APC	GRCh37	5	112174112	112174112	Nonsense_Mutation	SNP	G	G	T	c.2821G>T	p.Glu941Ter	p.E941*	ENST00000457016	16/16	3201/11025	2821/8532	941/2843	E/*	Gaa/Taa
Val_A	SC00360A	colorectal	APC	GRCh37	5	112175212	112175216	Frame_Shift_Del	DEL	AAAAG	AAAAG	-	c.3927_3931delAAAGA	p.Glu1309AspfsTer4	p.E1309Dfs*4	ENST00000457016	16/16	4301-4305/11025	3921-3925/8532	1307-1309/2843	IKE/IX	atAAAAGaa/ataa
Val_A	SC00361A	colorectal	APC	GRCh37	5	112173917	112173917	Nonsense_Mutation	SNP	C	C	T	c.2626C>T	p.Arg876Ter	p.R876*	ENST00000457016	16/16	3006/11025	2626/8532	876/2843	R/*	Cga/Tga
Val_A	SC00362A	colorectal	APC	GRCh37	5	112175437	112175438	Frame_Shift_Ins	INS	-	-	A	c.4147dupA	p.Met1383AsnfsTer3	p.M1383Nfs*3	ENST00000457016	16/16	4526-4527/11025	4146-4147/8532	1382-1383/2843	-/X	-/A
Val_A	SC00365A	colorectal	APC	GRCh37	5	112164616	112164616	Nonsense_Mutation	SNP	C	C	T	c.1690C>T	p.Arg564Ter	p.R564*	ENST00000457016	14/16	2070/11025	1690/8532	564/2843	R/*	Cga/Tga
Val_A	SC00366A	colorectal	APC	GRCh37	5	112175639	112175639	Nonsense_Mutation	SNP	C	C	T	c.4348C>T	p.Arg1450Ter	p.R1450*	ENST00000457016	16/16	4728/11025	4348/8532	1450/2843	R/*	Cga/Tga
Val_A	SC00368A	colorectal	APC	GRCh37	5	112175510	112175510	Frame_Shift_Del	DEL	A	A	-	c.4219delA	p.Ser1407ValfsTer8	p.S1407Vfs*8	ENST00000457016	16/16	4599/11025	4219/8532	1407/2843	S/X	Agt/gt
Val_A	SC00369A	colorectal	APC	GRCh37	5	112175217	112175217	Frame_Shift_Del	DEL	A	A	-	c.3929delA	p.Lys1310ArgfsTer11	p.K1310Rfs*11	ENST00000457016	16/16	4306/11025	3926/8532	1309/2843	E/X	gAa/ga
Val_A	SC00369A	colorectal	APC	GRCh37	5	112162945	112162945	Splice_Site	SNP	G	G	C	c.1548+1G>C		p.X516_splice	ENST00000457016		-/11025	1548/8532	516/2843
Val_A	SC00370A	colorectal	APC	GRCh37	5	112175599	112175599	Frame_Shift_Del	DEL	T	T	-	c.4308delT	p.Ser1436ArgfsTer37	p.S1436Rfs*37	ENST00000457016	16/16	4688/11025	4308/8532	1436/2843	S/X	agT/ag
Val_A	SC00370A	colorectal	APC	GRCh37	5	112163652	112163652	Nonsense_Mutation	SNP	C	C	A	c.1575C>A	p.Cys525Ter	p.C525*	ENST00000457016	13/16	1955/11025	1575/8532	525/2843	C/*	tgC/tgA
Val_A	SC00371A	colorectal	APC	GRCh37	5	112175751	112175752	Frame_Shift_Ins	INS	-	-	T	c.4463dupT	p.Leu1488PhefsTer26	p.L1488Ffs*26	ENST00000457016	16/16	4840-4841/11025	4460-4461/8532	1487/2843	T/TX	act/acTt
Val_A	SC00371A	colorectal	APC	GRCh37	5	112174658	112174658	Nonsense_Mutation	SNP	C	C	T	c.3367C>T	p.Gln1123Ter	p.Q1123*	ENST00000457016	16/16	3747/11025	3367/8532	1123/2843	Q/*	Caa/Taa
Val_A	SC00372A	colorectal	APC	GRCh37	5	112173926	112173926	Nonsense_Mutation	SNP	C	C	T	c.2635C>T	p.Gln879Ter	p.Q879*	ENST00000457016	16/16	3015/11025	2635/8532	879/2843	Q/*	Cag/Tag
Val_A	SC00372A	colorectal	APC	GRCh37	5	112175153	112175153	Nonsense_Mutation	SNP	G	G	T	c.3862G>T	p.Gly1288Ter	p.G1288*	ENST00000457016	16/16	4242/11025	3862/8532	1288/2843	G/*	Gga/Tga
Val_A	SC00375A	colorectal	APC	GRCh37	5	112128191	112128191	Nonsense_Mutation	SNP	C	C	T	c.694C>T	p.Arg232Ter	p.R232*	ENST00000457016	7/16	1074/11025	694/8532	232/2843	R/*	Cga/Tga
Val_A	SC00376A	colorectal	APC	GRCh37	5	112175639	112175639	Nonsense_Mutation	SNP	C	C	T	c.4348C>T	p.Arg1450Ter	p.R1450*	ENST00000457016	16/16	4728/11025	4348/8532	1450/2843	R/*	Cga/Tga
Val_A	SC00376A	colorectal	APC	GRCh37	5	112174058	112174058	Nonsense_Mutation	SNP	A	A	T	c.2767A>T	p.Arg923Ter	p.R923*	ENST00000457016	16/16	3147/11025	2767/8532	923/2843	R/*	Aga/Tga
Val_A	SC00377A	colorectal	APC	GRCh37	5	112175507	112175507	Nonsense_Mutation	SNP	C	C	T	c.4216C>T	p.Gln1406Ter	p.Q1406*	ENST00000457016	16/16	4596/11025	4216/8532	1406/2843	Q/*	Cag/Tag
Val_A	SC00379A	colorectal	APC	GRCh37	5	112175951	112175952	Frame_Shift_Ins	INS	-	-	A	c.4666dupA	p.Thr1556AsnfsTer3	p.T1556Nfs*3	ENST00000457016	16/16	5040-5041/11025	4660-4661/8532	1554/2843	E/EX	gaa/gAaa
Val_A	SC00380A	colorectal	APC	GRCh37	5	112128143	112128143	Nonsense_Mutation	SNP	C	C	T	c.646C>T	p.Arg216Ter	p.R216*	ENST00000457016	7/16	1026/11025	646/8532	216/2843	R/*	Cga/Tga
Val_A	SC00380A	colorectal	APC	GRCh37	5	112128170	112128170	Nonsense_Mutation	SNP	G	G	T	c.673G>T	p.Glu225Ter	p.E225*	ENST00000457016	7/16	1053/11025	673/8532	225/2843	E/*	Gaa/Taa
Val_A	SC00381A	colorectal	APC	GRCh37	5	112173917	112173917	Nonsense_Mutation	SNP	C	C	T	c.2626C>T	p.Arg876Ter	p.R876*	ENST00000457016	16/16	3006/11025	2626/8532	876/2843	R/*	Cga/Tga
Val_A	SC00382A	colorectal	APC	GRCh37	5	112128143	112128143	Nonsense_Mutation	SNP	C	C	T	c.646C>T	p.Arg216Ter	p.R216*	ENST00000457016	7/16	1026/11025	646/8532	216/2843	R/*	Cga/Tga
Val_A	SC00383A	colorectal	APC	GRCh37	5	112175245	112175255	Frame_Shift_Del	DEL	TCCTGTGAGCG	TCCTGTGAGCG	-	c.3954_3964delTCCTGTGAGCG	p.Asp1318GlufsTer10	p.D1318Efs*10	ENST00000457016	16/16	4334-4344/11025	3954-3964/8532	1318-1322/2843	DPVSE/EX	gaTCCTGTGAGCGaa/gaaa
Val_A	SC00385A	colorectal	APC	GRCh37	5	112175752	112175752	Frame_Shift_Del	DEL	T	T	-	c.4463delT	p.Leu1488TyrfsTer19	p.L1488Yfs*19	ENST00000457016	16/16	4841/11025	4461/8532	1487/2843	T/X	acT/ac
Val_A	SC00385A	colorectal	APC	GRCh37	5	112173590	112173590	Nonsense_Mutation	SNP	C	C	T	c.2299C>T	p.Gln767Ter	p.Q767*	ENST00000457016	16/16	2679/11025	2299/8532	767/2843	Q/*	Cag/Tag
Val_A	SC00386A	colorectal	APC	GRCh37	5	112173723	112173723	Frame_Shift_Del	DEL	C	C	-	c.2432delC	p.Ser811Ter	p.S811*	ENST00000457016	16/16	2812/11025	2432/8532	811/2843	S/X	tCa/ta
Val_A	SC00386A	colorectal	APC	GRCh37	5	112154774	112154774	Nonsense_Mutation	SNP	C	C	T	c.1045C>T	p.Gln349Ter	p.Q349*	ENST00000457016	10/16	1425/11025	1045/8532	349/2843	Q/*	Cag/Tag
Val_A	SC00386A	colorectal	APC	GRCh37	5	112175876	112175876	Nonsense_Mutation	SNP	C	C	T	c.4585C>T	p.Gln1529Ter	p.Q1529*	ENST00000457016	16/16	4965/11025	4585/8532	1529/2843	Q/*	Cag/Tag
Val_A	SC00387A	colorectal	APC	GRCh37	5	112175198	112175198	Nonsense_Mutation	SNP	C	C	T	c.3907C>T	p.Gln1303Ter	p.Q1303*	ENST00000457016	16/16	4287/11025	3907/8532	1303/2843	Q/*	Caa/Taa
Val_A	SC00387A	colorectal	APC	GRCh37	5	112164616	112164616	Nonsense_Mutation	SNP	C	C	T	c.1690C>T	p.Arg564Ter	p.R564*	ENST00000457016	14/16	2070/11025	1690/8532	564/2843	R/*	Cga/Tga
Val_A	SC00388A	colorectal	APC	GRCh37	5	112175480	112175481	Frame_Shift_Del	DEL	GA	GA	-	c.4192_4193delAG	p.Arg1399PhefsTer9	p.R1399Ffs*9	ENST00000457016	16/16	4569-4570/11025	4189-4190/8532	1397/2843	E/X	GAg/g
Val_A	SC00388A	colorectal	APC	GRCh37	5	112164616	112164616	Nonsense_Mutation	SNP	C	C	T	c.1690C>T	p.Arg564Ter	p.R564*	ENST00000457016	14/16	2070/11025	1690/8532	564/2843	R/*	Cga/Tga
Val_A	SC00389A	colorectal	APC	GRCh37	5	112128143	112128143	Nonsense_Mutation	SNP	C	C	T	c.646C>T	p.Arg216Ter	p.R216*	ENST00000457016	7/16	1026/11025	646/8532	216/2843	R/*	Cga/Tga
Val_A	SC00391A	colorectal	APC	GRCh37	5	112175507	112175507	Nonsense_Mutation	SNP	C	C	T	c.4216C>T	p.Gln1406Ter	p.Q1406*	ENST00000457016	16/16	4596/11025	4216/8532	1406/2843	Q/*	Cag/Tag
Val_A	SC00392A	colorectal	APC	GRCh37	5	112170648	112170648	Nonsense_Mutation	SNP	G	G	T	c.1744G>T	p.Glu582Ter	p.E582*	ENST00000457016	15/16	2124/11025	1744/8532	582/2843	E/*	Gaa/Taa
Val_A	SC00393A	colorectal	APC	GRCh37	5	112175225	112175232	Frame_Shift_Del	DEL	GGAACTAG	GGAACTAG	-	c.3935_3942delGAACTAGG	p.Gly1312ValfsTer3	p.G1312Vfs*3	ENST00000457016	16/16	4314-4321/11025	3934-3941/8532	1312-1314/2843	GTR/X	GGAACTAGg/g
Val_A	SC00394A	colorectal	APC	GRCh37	5	112175766	112175766	Frame_Shift_Del	DEL	C	C	-	c.4476delC	p.Thr1493ArgfsTer14	p.T1493Rfs*14	ENST00000457016	16/16	4855/11025	4475/8532	1492/2843	A/X	gCc/gc
Val_A	SC00394A	colorectal	APC	GRCh37	5	112174346	112174346	Nonsense_Mutation	SNP	G	G	T	c.3055G>T	p.Gly1019Ter	p.G1019*	ENST00000457016	16/16	3435/11025	3055/8532	1019/2843	G/*	Gga/Tga
Val_A	SC00395A	colorectal	APC	GRCh37	5	112151261	112151261	Nonsense_Mutation	SNP	C	C	T	c.904C>T	p.Arg302Ter	p.R302*	ENST00000457016	9/16	1284/11025	904/8532	302/2843	R/*	Cga/Tga
Val_A	SC00396A	colorectal	APC	GRCh37	5	112175614	112175617	Frame_Shift_Del	DEL	ACCT	ACCT	-	c.4323_4326delACCT	p.Pro1442LeufsTer30	p.P1442Lfs*30	ENST00000457016	16/16	4703-4706/11025	4323-4326/8532	1441-1442/2843	PP/X	ccACCT/cc
Val_A	SC00396A	colorectal	APC	GRCh37	5	112136997	112136997	Nonsense_Mutation	SNP	G	G	T	c.751G>T	p.Glu251Ter	p.E251*	ENST00000457016	8/16	1131/11025	751/8532	251/2843	E/*	Gaa/Taa
Val_A	SC00397A	colorectal	APC	GRCh37	5	112174267	112174267	Frame_Shift_Del	DEL	T	T	-	c.2976delT	p.Ser992ArgfsTer13	p.S992Rfs*13	ENST00000457016	16/16	3356/11025	2976/8532	992/2843	S/X	agT/ag
Val_A	SC00397A	colorectal	APC	GRCh37	5	112175639	112175639	Nonsense_Mutation	SNP	C	C	T	c.4348C>T	p.Arg1450Ter	p.R1450*	ENST00000457016	16/16	4728/11025	4348/8532	1450/2843	R/*	Cga/Tga
Val_A	SC00398A	colorectal	APC	GRCh37	5	112175951	112175952	Frame_Shift_Ins	INS	-	-	A	c.4666dupA	p.Thr1556AsnfsTer3	p.T1556Nfs*3	ENST00000457016	16/16	5040-5041/11025	4660-4661/8532	1554/2843	E/EX	gaa/gAaa
Val_A	SC00401A	colorectal	APC	GRCh37	5	112128143	112128143	Nonsense_Mutation	SNP	C	C	T	c.646C>T	p.Arg216Ter	p.R216*	ENST00000457016	7/16	1026/11025	646/8532	216/2843	R/*	Cga/Tga
Val_A	SC00402A	colorectal	APC	GRCh37	5	112174631	112174631	Nonsense_Mutation	SNP	C	C	T	c.3340C>T	p.Arg1114Ter	p.R1114*	ENST00000457016	16/16	3720/11025	3340/8532	1114/2843	R/*	Cga/Tga
Val_A	SC00405A	colorectal	APC	GRCh37	5	112116592	112116592	Nonsense_Mutation	SNP	C	C	T	c.637C>T	p.Arg213Ter	p.R213*	ENST00000457016	6/16	1017/11025	637/8532	213/2843	R/*	Cga/Tga
Val_A	SC00406A	colorectal	APC	GRCh37	5	112175770	112175770	Frame_Shift_Del	DEL	G	G	-	c.4480delG	p.Glu1494LysfsTer13	p.E1494Kfs*13	ENST00000457016	16/16	4859/11025	4479/8532	1493/2843	T/X	acG/ac
Val_A	SC00406A	colorectal	APC	GRCh37	5	112116592	112116592	Nonsense_Mutation	SNP	C	C	T	c.637C>T	p.Arg213Ter	p.R213*	ENST00000457016	6/16	1017/11025	637/8532	213/2843	R/*	Cga/Tga
Val_A	SC00407A	colorectal	APC	GRCh37	5	112175212	112175216	Frame_Shift_Del	DEL	AAAAG	AAAAG	-	c.3927_3931delAAAGA	p.Glu1309AspfsTer4	p.E1309Dfs*4	ENST00000457016	16/16	4301-4305/11025	3921-3925/8532	1307-1309/2843	IKE/IX	atAAAAGaa/ataa
Val_A	SC00407A	colorectal	APC	GRCh37	5	112175132	112175132	Frame_Shift_Del	DEL	T	T	-	c.3841delT	p.Ser1281HisfsTer7	p.S1281Hfs*7	ENST00000457016	16/16	4221/11025	3841/8532	1281/2843	S/X	Tca/ca
Val_A	SC00409A	colorectal	APC	GRCh37	5	112174796	112174796	Nonsense_Mutation	SNP	G	G	T	c.3505G>T	p.Glu1169Ter	p.E1169*	ENST00000457016	16/16	3885/11025	3505/8532	1169/2843	E/*	Gag/Tag
Val_A	SC00410A	colorectal	APC	GRCh37	5	112174873	112174873	Frame_Shift_Del	DEL	A	A	-	c.3582delA	p.Ser1196HisfsTer69	p.S1196Hfs*69	ENST00000457016	16/16	3962/11025	3582/8532	1194/2843	S/X	tcA/tc
Val_A	SC00410A	colorectal	APC	GRCh37	5	112175576	112175576	Nonsense_Mutation	SNP	C	C	T	c.4285C>T	p.Gln1429Ter	p.Q1429*	ENST00000457016	16/16	4665/11025	4285/8532	1429/2843	Q/*	Caa/Taa
Val_A	SC00411A	colorectal	APC	GRCh37	5	112173917	112173917	Nonsense_Mutation	SNP	C	C	T	c.2626C>T	p.Arg876Ter	p.R876*	ENST00000457016	16/16	3006/11025	2626/8532	876/2843	R/*	Cga/Tga
Val_A	SC00412A	colorectal	APC	GRCh37	5	112175141	112175141	Nonsense_Mutation	SNP	G	G	T	c.3850G>T	p.Glu1284Ter	p.E1284*	ENST00000457016	16/16	4230/11025	3850/8532	1284/2843	E/*	Gaa/Taa
Val_A	SC00413A	colorectal	APC	GRCh37	5	112155026	112155026	Nonsense_Mutation	SNP	C	C	T	c.1297C>T	p.Gln433Ter	p.Q433*	ENST00000457016	10/16	1677/11025	1297/8532	433/2843	Q/*	Cag/Tag
Val_A	SC00415A	colorectal	APC	GRCh37	5	112170746	112170747	Frame_Shift_Ins	INS	-	-	T	c.1847dupT	p.Leu616PhefsTer18	p.L616Ffs*18	ENST00000457016	15/16	2222-2223/11025	1842-1843/8532	614-615/2843	-/X	-/T
Val_A	SC00415A	colorectal	APC	GRCh37	5	112175303	112175303	Nonsense_Mutation	SNP	C	C	T	c.4012C>T	p.Gln1338Ter	p.Q1338*	ENST00000457016	16/16	4392/11025	4012/8532	1338/2843	Q/*	Cag/Tag
Val_A	SC00416A	colorectal	APC	GRCh37	5	112175147	112175147	Nonsense_Mutation	SNP	G	G	T	c.3856G>T	p.Glu1286Ter	p.E1286*	ENST00000457016	16/16	4236/11025	3856/8532	1286/2843	E/*	Gaa/Taa
Val_A	SC00416A	colorectal	APC	GRCh37	5	112164616	112164616	Nonsense_Mutation	SNP	C	C	T	c.1690C>T	p.Arg564Ter	p.R564*	ENST00000457016	14/16	2070/11025	1690/8532	564/2843	R/*	Cga/Tga
Val_A	SC00419A	colorectal	APC	GRCh37	5	112175772	112175772	Frame_Shift_Del	DEL	A	A	-	c.4483delA	p.Ser1495ValfsTer12	p.S1495Vfs*12	ENST00000457016	16/16	4861/11025	4481/8532	1494/2843	E/X	gAa/ga
Val_A	SC00419A	colorectal	APC	GRCh37	5	112175951	112175952	Frame_Shift_Ins	INS	-	-	A	c.4666dupA	p.Thr1556AsnfsTer3	p.T1556Nfs*3	ENST00000457016	16/16	5040-5041/11025	4660-4661/8532	1554/2843	E/EX	gaa/gAaa
Val_A	SC00420A	colorectal	RNF43	GRCh37	17	56435161	56435161	Frame_Shift_Del	DEL	C	C	-	c.1976delG	p.Gly659ValfsTer41	p.G659Vfs*41	ENST00000584437	8/9	3932/5575	1976/2352	659/783	G/X	gGt/gt
Val_A	SC00420A	colorectal	RNF43	GRCh37	17	56440943	56440943	Nonsense_Mutation	SNP	G	G	A	c.394C>T	p.Arg132Ter	p.R132*	ENST00000584437	3/9	2350/5575	394/2352	132/783	R/*	Cga/Tga
Val_A	SC00423A	colorectal	APC	GRCh37	5	112116589	112116589	Nonsense_Mutation	SNP	A	A	T	c.634A>T	p.Lys212Ter	p.K212*	ENST00000457016	6/16	1014/11025	634/8532	212/2843	K/*	Aaa/Taa
Val_A	SC00424A	colorectal	APC	GRCh37	5	112174784	112174784	Nonsense_Mutation	SNP	A	A	T	c.3493A>T	p.Lys1165Ter	p.K1165*	ENST00000457016	16/16	3873/11025	3493/8532	1165/2843	K/*	Aaa/Taa
Val_A	SC00425A	colorectal	APC	GRCh37	5	112175639	112175639	Nonsense_Mutation	SNP	C	C	T	c.4348C>T	p.Arg1450Ter	p.R1450*	ENST00000457016	16/16	4728/11025	4348/8532	1450/2843	R/*	Cga/Tga
Val_A	SC00426A	colorectal	APC	GRCh37	5	112154771	112154771	Nonsense_Mutation	SNP	C	C	T	c.1042C>T	p.Arg348Ter	p.R348*	ENST00000457016	10/16	1422/11025	1042/8532	348/2843	R/*	Cga/Tga
Val_A	SC00426A	colorectal	CTNNB1	GRCh37	3	41266137	41266137	Missense_Mutation	SNP	C	C	T	c.134C>T	p.Ser45Phe	p.S45F	ENST00000349496	3/15	414/3729	134/2346	45/781	S/F	tCt/tTt
Val_A	SC00429A	colorectal	APC	GRCh37	5	112174490	112174493	Frame_Shift_Del	DEL	CAAT	CAAT	-	c.3202_3205delTCAA	p.Ser1068GlyfsTer57	p.S1068Gfs*57	ENST00000457016	16/16	3579-3582/11025	3199-3202/8532	1067-1068/2843	QS/X	CAATca/ca
Val_A	SC00429A	colorectal	APC	GRCh37	5	112175648	112175648	Frame_Shift_Del	DEL	C	C	-	c.4358delC	p.Pro1453LeufsTer20	p.P1453Lfs*20	ENST00000457016	16/16	4737/11025	4357/8532	1453/2843	P/X	Cct/ct
Val_A	SC00431A	colorectal	APC	GRCh37	5	112154967	112154968	Frame_Shift_Ins	INS	-	-	A	c.1239dupA	p.Arg414ThrfsTer5	p.R414Tfs*5	ENST00000457016	10/16	1618-1619/11025	1238-1239/8532	413/2843	I/IX	ata/atAa
Val_A	SC00431A	colorectal	APC	GRCh37	5	112175507	112175507	Nonsense_Mutation	SNP	C	C	T	c.4216C>T	p.Gln1406Ter	p.Q1406*	ENST00000457016	16/16	4596/11025	4216/8532	1406/2843	Q/*	Cag/Tag
Val_A	SC00432A	colorectal	APC	GRCh37	5	112174189	112174189	Frame_Shift_Del	DEL	T	T	-	c.2898delT	p.Ser966ArgfsTer14	p.S966Rfs*14	ENST00000457016	16/16	3278/11025	2898/8532	966/2843	S/X	agT/ag
Val_A	SC00434A	colorectal	APC	GRCh37	5	112175212	112175216	Frame_Shift_Del	DEL	AAAAG	AAAAG	-	c.3927_3931delAAAGA	p.Glu1309AspfsTer4	p.E1309Dfs*4	ENST00000457016	16/16	4301-4305/11025	3921-3925/8532	1307-1309/2843	IKE/IX	atAAAAGaa/ataa
Val_A	SC00435A	colorectal	APC	GRCh37	5	112175524	112175524	Frame_Shift_Del	DEL	T	T	-	c.4233delT	p.Ser1411ArgfsTer4	p.S1411Rfs*4	ENST00000457016	16/16	4613/11025	4233/8532	1411/2843	S/X	agT/ag
Val_A	SC00437A	colorectal	APC	GRCh37	5	112175951	112175952	Frame_Shift_Ins	INS	-	-	A	c.4666dupA	p.Thr1556AsnfsTer3	p.T1556Nfs*3	ENST00000457016	16/16	5040-5041/11025	4660-4661/8532	1554/2843	E/EX	gaa/gAaa
Val_A	SC00437A	colorectal	APC	GRCh37	5	112173917	112173917	Nonsense_Mutation	SNP	C	C	T	c.2626C>T	p.Arg876Ter	p.R876*	ENST00000457016	16/16	3006/11025	2626/8532	876/2843	R/*	Cga/Tga
Val_A	SC00438A	colorectal	APC	GRCh37	5	112176018	112176018	Frame_Shift_Del	DEL	A	A	-	c.4728delA	p.Glu1577AsnfsTer73	p.E1577Nfs*73	ENST00000457016	16/16	5107/11025	4727/8532	1576/2843	E/X	gAa/ga
Val_A	SC00438A	colorectal	APC	GRCh37	5	112173917	112173917	Nonsense_Mutation	SNP	C	C	T	c.2626C>T	p.Arg876Ter	p.R876*	ENST00000457016	16/16	3006/11025	2626/8532	876/2843	R/*	Cga/Tga
Val_A	SC00439A	colorectal	APC	GRCh37	5	112174580	112174580	Nonsense_Mutation	SNP	G	G	T	c.3289G>T	p.Glu1097Ter	p.E1097*	ENST00000457016	16/16	3669/11025	3289/8532	1097/2843	E/*	Gaa/Taa
Val_A	SC00440A	colorectal	APC	GRCh37	5	112175951	112175952	Frame_Shift_Ins	INS	-	-	A	c.4666dupA	p.Thr1556AsnfsTer3	p.T1556Nfs*3	ENST00000457016	16/16	5040-5041/11025	4660-4661/8532	1554/2843	E/EX	gaa/gAaa
Val_A	SC00440A	colorectal	APC	GRCh37	5	112137048	112137048	Nonsense_Mutation	SNP	G	G	T	c.802G>T	p.Glu268Ter	p.E268*	ENST00000457016	8/16	1182/11025	802/8532	268/2843	E/*	Gaa/Taa
Val_A	SC00441A	colorectal	APC	GRCh37	5	112128191	112128191	Nonsense_Mutation	SNP	C	C	T	c.694C>T	p.Arg232Ter	p.R232*	ENST00000457016	7/16	1074/11025	694/8532	232/2843	R/*	Cga/Tga
Val_A	SC00441A	colorectal	APC	GRCh37	5	112175828	112175828	Nonsense_Mutation	SNP	G	G	T	c.4537G>T	p.Glu1513Ter	p.E1513*	ENST00000457016	16/16	4917/11025	4537/8532	1513/2843	E/*	Gag/Tag
Val_A	SC00443A	colorectal	RNF43	GRCh37	17	56435161	56435161	Frame_Shift_Del	DEL	C	C	-	c.1976delG	p.Gly659ValfsTer41	p.G659Vfs*41	ENST00000584437	8/9	3932/5575	1976/2352	659/783	G/X	gGt/gt
Val_A	SC00444A	colorectal	APC	GRCh37	5	112175585	112175603	Frame_Shift_Del	DEL	CCACCAAGCAGAAGTAAAA	CCACCAAGCAGAAGTAAAA	-	c.4295_4313delCACCAAGCAGAAGTAAAAC	p.Pro1432HisfsTer35	p.P1432Hfs*35	ENST00000457016	16/16	4674-4692/11025	4294-4312/8532	1432-1438/2843	PPSRSKT/X	CCACCAAGCAGAAGTAAAAca/ca
Val_A	SC00444A	colorectal	APC	GRCh37	5	112174160	112174160	Nonsense_Mutation	SNP	A	A	T	c.2869A>T	p.Lys957Ter	p.K957*	ENST00000457016	16/16	3249/11025	2869/8532	957/2843	K/*	Aag/Tag
Val_A	SC00445A	colorectal	APC	GRCh37	5	112175513	112175513	Nonsense_Mutation	SNP	G	G	T	c.4222G>T	p.Glu1408Ter	p.E1408*	ENST00000457016	16/16	4602/11025	4222/8532	1408/2843	E/*	Gaa/Taa
Val_A	SC00445A	colorectal	APC	GRCh37	5	112164616	112164616	Nonsense_Mutation	SNP	C	C	T	c.1690C>T	p.Arg564Ter	p.R564*	ENST00000457016	14/16	2070/11025	1690/8532	564/2843	R/*	Cga/Tga
Val_A	SC00446A	colorectal	APC	GRCh37	5	112174631	112174631	Nonsense_Mutation	SNP	C	C	T	c.3340C>T	p.Arg1114Ter	p.R1114*	ENST00000457016	16/16	3720/11025	3340/8532	1114/2843	R/*	Cga/Tga
Val_A	SC00447A	colorectal	APC	GRCh37	5	112163698	112163698	Nonsense_Mutation	SNP	C	C	T	c.1621C>T	p.Gln541Ter	p.Q541*	ENST00000457016	13/16	2001/11025	1621/8532	541/2843	Q/*	Cag/Tag
Val_A	SC00447A	colorectal	APC	GRCh37	5	112175235	112175235	Nonsense_Mutation	SNP	C	C	G	c.3944C>G	p.Ser1315Ter	p.S1315*	ENST00000457016	16/16	4324/11025	3944/8532	1315/2843	S/*	tCa/tGa
Val_A	SC00448A	colorectal	APC	GRCh37	5	112175565	112175566	Frame_Shift_Del	DEL	AT	AT	-	c.4275_4276delTA	p.Asp1425GlufsTer12	p.D1425Efs*12	ENST00000457016	16/16	4654-4655/11025	4274-4275/8532	1425/2843	D/X	gAT/g
Val_A	SC00448A	colorectal	APC	GRCh37	5	112173995	112173995	Nonsense_Mutation	SNP	G	G	T	c.2704G>T	p.Glu902Ter	p.E902*	ENST00000457016	16/16	3084/11025	2704/8532	902/2843	E/*	Gaa/Taa
Val_A	SC00449A	colorectal	APC	GRCh37	5	112175417	112175418	Frame_Shift_Del	DEL	TA	TA	-	c.4127_4128delAT	p.Tyr1376CysfsTer9	p.Y1376Cfs*9	ENST00000457016	16/16	4506-4507/11025	4126-4127/8532	1376/2843	Y/X	TAt/t
Val_A	SC00450A	colorectal	APC	GRCh37	5	112174266	112174267	Frame_Shift_Ins	INS	-	-	T	c.2976dupT	p.Lys993Ter	p.K993*	ENST00000457016	16/16	3355-3356/11025	2975-2976/8532	992/2843	S/SX	agt/agTt
Val_A	SC00450A	colorectal	APC	GRCh37	5	112175732	112175733	Frame_Shift_Ins	INS	-	-	T	c.4443dupT	p.Leu1482SerfsTer5	p.L1482Sfs*5	ENST00000457016	16/16	4821-4822/11025	4441-4442/8532	1481/2843	V/VX	gtt/gTtt
Val_A	SC00451A	colorectal	APC	GRCh37	5	112175639	112175639	Nonsense_Mutation	SNP	C	C	T	c.4348C>T	p.Arg1450Ter	p.R1450*	ENST00000457016	16/16	4728/11025	4348/8532	1450/2843	R/*	Cga/Tga
Val_A	SC00451A	colorectal	APC	GRCh37	5	112174043	112174043	Nonsense_Mutation	SNP	G	G	T	c.2752G>T	p.Glu918Ter	p.E918*	ENST00000457016	16/16	3132/11025	2752/8532	918/2843	E/*	Gag/Tag
Val_A	SC00452A	colorectal	APC	GRCh37	5	112175746	112175746	Frame_Shift_Del	DEL	T	T	-	c.4455delT	p.Asp1486IlefsTer21	p.D1486Ifs*21	ENST00000457016	16/16	4835/11025	4455/8532	1485/2843	A/X	gcT/gc
Val_A	SC00453A	colorectal	APC	GRCh37	5	112151204	112151204	Nonsense_Mutation	SNP	C	C	T	c.847C>T	p.Arg283Ter	p.R283*	ENST00000457016	9/16	1227/11025	847/8532	283/2843	R/*	Cga/Tga
Val_A	SC00454A	colorectal	APC	GRCh37	5	112175752	112175752	Frame_Shift_Del	DEL	T	T	-	c.4463delT	p.Leu1488TyrfsTer19	p.L1488Yfs*19	ENST00000457016	16/16	4841/11025	4461/8532	1487/2843	T/X	acT/ac
Val_A	SC00455A	colorectal	APC	GRCh37	5	112128191	112128191	Nonsense_Mutation	SNP	C	C	T	c.694C>T	p.Arg232Ter	p.R232*	ENST00000457016	7/16	1074/11025	694/8532	232/2843	R/*	Cga/Tga
Val_A	SC00456A	colorectal	APC	GRCh37	5	112175339	112175339	Frame_Shift_Del	DEL	A	A	-	c.4050delA	p.Ala1351LeufsTer64	p.A1351Lfs*64	ENST00000457016	16/16	4428/11025	4048/8532	1350/2843	K/X	Aaa/aa
Val_A	SC00456A	colorectal	APC	GRCh37	5	112175216	112175216	Nonsense_Mutation	SNP	G	G	T	c.3925G>T	p.Glu1309Ter	p.E1309*	ENST00000457016	16/16	4305/11025	3925/8532	1309/2843	E/*	Gaa/Taa
Val_A	SC00457A	colorectal	APC	GRCh37	5	112173289	112173290	Frame_Shift_Del	DEL	AC	AC	-	c.1999_2000delCA	p.Gln667ThrfsTer6	p.Q667Tfs*6	ENST00000457016	16/16	2378-2379/11025	1998-1999/8532	666-667/2843	LQ/LX	ttACaa/ttaa
Val_A	SC00457A	colorectal	APC	GRCh37	5	112175675	112175676	Frame_Shift_Ins	INS	-	-	AG	c.4393_4394dupAG	p.Ser1465ArgfsTer9	p.S1465Rfs*9	ENST00000457016	16/16	4764-4765/11025	4384-4385/8532	1462/2843	K/KX	aag/aAGag
Val_A	SC00457A	colorectal	APC	GRCh37	5	112154942	112154942	Nonsense_Mutation	SNP	C	C	T	c.1213C>T	p.Arg405Ter	p.R405*	ENST00000457016	10/16	1593/11025	1213/8532	405/2843	R/*	Cga/Tga
Val_A	SC00458A	colorectal	APC	GRCh37	5	112173730	112173730	Frame_Shift_Del	DEL	T	T	-	c.2442delT	p.Phe814LeufsTer6	p.F814Lfs*6	ENST00000457016	16/16	2819/11025	2439/8532	813/2843	N/X	aaT/aa
Val_A	SC00462A	colorectal	APC	GRCh37	5	112175754	112175754	Nonsense_Mutation	SNP	T	T	A	c.4463T>A	p.Leu1488Ter	p.L1488*	ENST00000457016	16/16	4843/11025	4463/8532	1488/2843	L/*	tTa/tAa
Val_A	SC00462A	colorectal	APC	GRCh37	5	112090699	112090699	Nonsense_Mutation	SNP	G	G	T	c.112G>T	p.Glu38Ter	p.E38*	ENST00000457016	2/16	492/11025	112/8532	38/2843	E/*	Gaa/Taa
Val_A	SC00463A	colorectal	APC	GRCh37	5	112175754	112175754	Nonsense_Mutation	SNP	T	T	G	c.4463T>G	p.Leu1488Ter	p.L1488*	ENST00000457016	16/16	4843/11025	4463/8532	1488/2843	L/*	tTa/tGa
Val_A	SC00464A	colorectal	APC	GRCh37	5	112175951	112175952	Frame_Shift_Ins	INS	-	-	A	c.4666dupA	p.Thr1556AsnfsTer3	p.T1556Nfs*3	ENST00000457016	16/16	5040-5041/11025	4660-4661/8532	1554/2843	E/EX	gaa/gAaa
Val_A	SC00464A	colorectal	APC	GRCh37	5	112154723	112154723	Nonsense_Mutation	SNP	C	C	T	c.994C>T	p.Arg332Ter	p.R332*	ENST00000457016	10/16	1374/11025	994/8532	332/2843	R/*	Cga/Tga
Val_A	SC00465A	colorectal	APC	GRCh37	5	112175651	112175651	Frame_Shift_Del	DEL	A	A	-	c.4364delA	p.Asn1455IlefsTer18	p.N1455Ifs*18	ENST00000457016	16/16	4740/11025	4360/8532	1454/2843	K/X	Aaa/aa
Val_A	SC00465A	colorectal	APC	GRCh37	5	112173537	112173537	Nonsense_Mutation	SNP	T	T	A	c.2246T>A	p.Leu749Ter	p.L749*	ENST00000457016	16/16	2626/11025	2246/8532	749/2843	L/*	tTg/tAg
Val_A	SC00466A	colorectal	APC	GRCh37	5	112174816	112174816	Frame_Shift_Del	DEL	G	G	-	c.3525delG	p.Gln1175HisfsTer7	p.Q1175Hfs*7	ENST00000457016	16/16	3905/11025	3525/8532	1175/2843	Q/X	caG/ca
Val_A	SC00467A	colorectal	APC	GRCh37	5	112176008	112176008	Nonsense_Mutation	SNP	G	G	T	c.4717G>T	p.Glu1573Ter	p.E1573*	ENST00000457016	16/16	5097/11025	4717/8532	1573/2843	E/*	Gaa/Taa
Val_A	SC00468A	colorectal	APC	GRCh37	5	112174835	112174835	Nonsense_Mutation	SNP	A	A	T	c.3544A>T	p.Lys1182Ter	p.K1182*	ENST00000457016	16/16	3924/11025	3544/8532	1182/2843	K/*	Aaa/Taa
Val_A	SC00469A	colorectal	APC	GRCh37	5	112175485	112175486	Frame_Shift_Ins	INS	-	-	C	c.4195dupC	p.Arg1399ProfsTer10	p.R1399Pfs*10	ENST00000457016	16/16	4574-4575/11025	4194-4195/8532	1398-1399/2843	-/X	-/C
Val_A	SC00469A	colorectal	APC	GRCh37	5	112128143	112128143	Nonsense_Mutation	SNP	C	C	T	c.646C>T	p.Arg216Ter	p.R216*	ENST00000457016	7/16	1026/11025	646/8532	216/2843	R/*	Cga/Tga
Val_A	SC00470A	colorectal	APC	GRCh37	5	112128143	112128143	Nonsense_Mutation	SNP	C	C	T	c.646C>T	p.Arg216Ter	p.R216*	ENST00000457016	7/16	1026/11025	646/8532	216/2843	R/*	Cga/Tga
Val_A	SC00472A	colorectal	APC	GRCh37	5	112162945	112162945	Splice_Site	SNP	G	G	A	c.1548+1G>A		p.X516_splice	ENST00000457016		-/11025	1548/8532	516/2843
Val_A	SC00472A	colorectal	APC	GRCh37	5	112175358	112175358	Nonsense_Mutation	SNP	C	C	A	c.4067C>A	p.Ser1356Ter	p.S1356*	ENST00000457016	16/16	4447/11025	4067/8532	1356/2843	S/*	tCa/tAa
Val_A	SC00472A	colorectal	RNF43	GRCh37	17	56435161	56435161	Frame_Shift_Del	DEL	C	C	-	c.1976delG	p.Gly659ValfsTer41	p.G659Vfs*41	ENST00000584437	8/9	3932/5575	1976/2352	659/783	G/X	gGt/gt
Val_A	SC00475A	colorectal	APC	GRCh37	5	112175951	112175952	Frame_Shift_Ins	INS	-	-	A	c.4666dupA	p.Thr1556AsnfsTer3	p.T1556Nfs*3	ENST00000457016	16/16	5040-5041/11025	4660-4661/8532	1554/2843	E/EX	gaa/gAaa
Val_A	SC00476A	colorectal	APC	GRCh37	5	112173860	112173860	Nonsense_Mutation	SNP	G	G	T	c.2569G>T	p.Gly857Ter	p.G857*	ENST00000457016	16/16	2949/11025	2569/8532	857/2843	G/*	Gga/Tga
Val_A	SC00478A	colorectal	APC	GRCh37	5	112175423	112175423	Nonsense_Mutation	SNP	C	C	T	c.4132C>T	p.Gln1378Ter	p.Q1378*	ENST00000457016	16/16	4512/11025	4132/8532	1378/2843	Q/*	Cag/Tag
Val_A	SC00479A	colorectal	APC	GRCh37	5	112175423	112175423	Nonsense_Mutation	SNP	C	C	T	c.4132C>T	p.Gln1378Ter	p.Q1378*	ENST00000457016	16/16	4512/11025	4132/8532	1378/2843	Q/*	Cag/Tag
Val_A	SC00479A	colorectal	APC	GRCh37	5	112175133	112175133	Nonsense_Mutation	SNP	C	C	A	c.3842C>A	p.Ser1281Ter	p.S1281*	ENST00000457016	16/16	4222/11025	3842/8532	1281/2843	S/*	tCa/tAa
Val_A	SC00480A	colorectal	APC	GRCh37	5	112175770	112175770	Frame_Shift_Del	DEL	G	G	-	c.4480delG	p.Glu1494LysfsTer13	p.E1494Kfs*13	ENST00000457016	16/16	4859/11025	4479/8532	1493/2843	T/X	acG/ac
Val_A	SC00480A	colorectal	APC	GRCh37	5	112174357	112174358	Frame_Shift_Ins	INS	-	-	A	c.3067dupA	p.Thr1023AsnfsTer6	p.T1023Nfs*6	ENST00000457016	16/16	3446-3447/11025	3066-3067/8532	1022-1023/2843	-/X	-/A
Val_A	SC00481A	colorectal	APC	GRCh37	5	112173917	112173917	Nonsense_Mutation	SNP	C	C	T	c.2626C>T	p.Arg876Ter	p.R876*	ENST00000457016	16/16	3006/11025	2626/8532	876/2843	R/*	Cga/Tga
Val_A	SC00482A	colorectal	APC	GRCh37	5	112175551	112175552	Frame_Shift_Del	DEL	CA	CA	-	c.4260_4261delCA	p.Ser1421Ter	p.S1421*	ENST00000457016	16/16	4640-4641/11025	4260-4261/8532	1420-1421/2843	PS/PX	ccCAgt/ccgt
Val_A	SC00483A	colorectal	RNF43	GRCh37	17	56492919	56492926	Frame_Shift_Del	DEL	AGCTGGTG	AGCTGGTG	-	c.13_20delCACCAGCT	p.His5AlafsTer32	p.H5Afs*32	ENST00000584437	1/9	1969-1976/5575	13-20/2352	5-7/783	HQL/X	CACCAGCTg/g
Val_A	SC00485A	colorectal	APC	GRCh37	5	112175676	112175677	Frame_Shift_Del	DEL	AG	AG	-	c.4393_4394delAG	p.Ser1465TrpfsTer3	p.S1465Wfs*3	ENST00000457016	16/16	4765-4766/11025	4385-4386/8532	1462/2843	K/X	aAG/a
Val_A	SC00485A	colorectal	APC	GRCh37	5	112174268	112174268	Nonsense_Mutation	SNP	A	A	T	c.2977A>T	p.Lys993Ter	p.K993*	ENST00000457016	16/16	3357/11025	2977/8532	993/2843	K/*	Aag/Tag
Val_A	SC00486A	colorectal	APC	GRCh37	5	112175639	112175639	Nonsense_Mutation	SNP	C	C	T	c.4348C>T	p.Arg1450Ter	p.R1450*	ENST00000457016	16/16	4728/11025	4348/8532	1450/2843	R/*	Cga/Tga
Val_A	SC00486A	colorectal	APC	GRCh37	5	112162891	112162891	Nonsense_Mutation	SNP	C	C	T	c.1495C>T	p.Arg499Ter	p.R499*	ENST00000457016	12/16	1875/11025	1495/8532	499/2843	R/*	Cga/Tga
Val_A	SC00487A	colorectal	APC	GRCh37	5	112173766	112173766	Nonsense_Mutation	SNP	T	T	A	c.2475T>A	p.Tyr825Ter	p.Y825*	ENST00000457016	16/16	2855/11025	2475/8532	825/2843	Y/*	taT/taA
Val_A	SC00491A	colorectal	APC	GRCh37	5	112175752	112175752	Frame_Shift_Del	DEL	T	T	-	c.4463delT	p.Leu1488TyrfsTer19	p.L1488Yfs*19	ENST00000457016	16/16	4841/11025	4461/8532	1487/2843	T/X	acT/ac
Val_A	SC00493A	colorectal	APC	GRCh37	5	112175676	112175677	Frame_Shift_Del	DEL	AG	AG	-	c.4393_4394delAG	p.Ser1465TrpfsTer3	p.S1465Wfs*3	ENST00000457016	16/16	4765-4766/11025	4385-4386/8532	1462/2843	K/X	aAG/a
Val_A	SC00494A	colorectal	APC	GRCh37	5	112116601	112116601	Splice_Site	SNP	G	G	A	c.645+1G>A		p.X215_splice	ENST00000457016		-/11025	645/8532	215/2843
Val_A	SC00496A	colorectal	APC	GRCh37	5	112157601	112157601	Frame_Shift_Del	DEL	C	C	-	c.1322delC	p.Pro441LeufsTer13	p.P441Lfs*13	ENST00000457016	11/16	1701/11025	1321/8532	441/2843	P/X	Cct/ct
Val_A	SC00497A	colorectal	APC	GRCh37	5	112175676	112175679	Frame_Shift_Del	DEL	AGAG	AGAG	-	c.4391_4394delAGAG	p.Glu1464ValfsTer8	p.E1464Vfs*8	ENST00000457016	16/16	4765-4768/11025	4385-4388/8532	1462-1463/2843	KR/X	aAGAGa/aa
Val_A	SC00497A	colorectal	APC	GRCh37	5	112151204	112151204	Nonsense_Mutation	SNP	C	C	T	c.847C>T	p.Arg283Ter	p.R283*	ENST00000457016	9/16	1227/11025	847/8532	283/2843	R/*	Cga/Tga
Val_A	SC00498A	colorectal	APC	GRCh37	5	112175513	112175513	Nonsense_Mutation	SNP	G	G	T	c.4222G>T	p.Glu1408Ter	p.E1408*	ENST00000457016	16/16	4602/11025	4222/8532	1408/2843	E/*	Gaa/Taa
Val_A	SC00499A	colorectal	APC	GRCh37	5	112175390	112175390	Nonsense_Mutation	SNP	C	C	T	c.4099C>T	p.Gln1367Ter	p.Q1367*	ENST00000457016	16/16	4479/11025	4099/8532	1367/2843	Q/*	Cag/Tag
Val_A	SC00500A	colorectal	APC	GRCh37	5	112173516	112173516	Frame_Shift_Del	DEL	T	T	-	c.2226delT	p.Met743CysfsTer18	p.M743Cfs*18	ENST00000457016	16/16	2605/11025	2225/8532	742/2843	I/X	aTt/at
Val_A	SC00501A	colorectal	APC	GRCh37	5	112175360	112175360	Nonsense_Mutation	SNP	G	G	T	c.4069G>T	p.Gly1357Ter	p.G1357*	ENST00000457016	16/16	4449/11025	4069/8532	1357/2843	G/*	Gga/Tga
Val_A	SC00504A	colorectal	APC	GRCh37	5	112174631	112174631	Nonsense_Mutation	SNP	C	C	T	c.3340C>T	p.Arg1114Ter	p.R1114*	ENST00000457016	16/16	3720/11025	3340/8532	1114/2843	R/*	Cga/Tga
Val_A	SC00504A	colorectal	APC	GRCh37	5	112175858	112175858	Nonsense_Mutation	SNP	A	A	T	c.4567A>T	p.Arg1523Ter	p.R1523*	ENST00000457016	16/16	4947/11025	4567/8532	1523/2843	R/*	Aga/Tga
Val_A	SC00505A	colorectal	APC	GRCh37	5	112173251	112173251	Nonsense_Mutation	SNP	C	C	T	c.1960C>T	p.Gln654Ter	p.Q654*	ENST00000457016	16/16	2340/11025	1960/8532	654/2843	Q/*	Caa/Taa
Val_A	SC00507A	colorectal	APC	GRCh37	5	112154935	112154935	Frame_Shift_Del	DEL	T	T	-	c.1206delT	p.Glu403LysfsTer51	p.E403Kfs*51	ENST00000457016	10/16	1586/11025	1206/8532	402/2843	R/X	cgT/cg
Val_A	SC00508A	colorectal	APC	GRCh37	5	112116592	112116592	Nonsense_Mutation	SNP	C	C	T	c.637C>T	p.Arg213Ter	p.R213*	ENST00000457016	6/16	1017/11025	637/8532	213/2843	R/*	Cga/Tga
Val_A	SC00509A	colorectal	APC	GRCh37	5	112175212	112175216	Frame_Shift_Del	DEL	AAAAG	AAAAG	-	c.3927_3931delAAAGA	p.Glu1309AspfsTer4	p.E1309Dfs*4	ENST00000457016	16/16	4301-4305/11025	3921-3925/8532	1307-1309/2843	IKE/IX	atAAAAGaa/ataa
Val_A	SC00509A	colorectal	APC	GRCh37	5	112174670	112174671	Frame_Shift_Ins	INS	-	-	AG	c.3380_3381dupAG	p.Gln1131ValfsTer35	p.Q1131Vfs*35	ENST00000457016	16/16	3759-3760/11025	3379-3380/8532	1127/2843	Q/QX	cag/cAGag
Val_A	SC00510A	colorectal	RNF43	GRCh37	17	56492776	56492800	Frame_Shift_Del	DEL	TTTTCAAGGGGATCACTCTGATAAT	TTTTCAAGGGGATCACTCTGATAAT	AAGAACAGC	c.139_163delATTATCAGAGTGATCCCCTTGAAAAinsGCTGTTCTT	p.Ile47AlafsTer10	p.I47Afs*10	ENST00000584437	1/9	2095-2119/5575	139-163/2352	47-55/783	IIRVIPLKM/AVLX	ATTATCAGAGTGATCCCCTTGAAAAtg/GCTGTTCTTtg
Val_A	SC00511A	colorectal	APC	GRCh37	5	112175426	112175426	Nonsense_Mutation	SNP	G	G	T	c.4135G>T	p.Glu1379Ter	p.E1379*	ENST00000457016	16/16	4515/11025	4135/8532	1379/2843	E/*	Gag/Tag
Val_A	SC00512A	colorectal	APC	GRCh37	5	112175207	112175207	Nonsense_Mutation	SNP	G	G	T	c.3916G>T	p.Glu1306Ter	p.E1306*	ENST00000457016	16/16	4296/11025	3916/8532	1306/2843	E/*	Gaa/Taa
Val_A	SC00514A	colorectal	APC	GRCh37	5	112174282	112174282	Nonsense_Mutation	SNP	T	T	A	c.2991T>A	p.Tyr997Ter	p.Y997*	ENST00000457016	16/16	3371/11025	2991/8532	997/2843	Y/*	taT/taA
Val_A	SC00516A	colorectal	APC	GRCh37	5	112137054	112137055	Frame_Shift_Ins	INS	-	-	AC	c.810_811dupCA	p.Met271ThrfsTer23	p.M271Tfs*23	ENST00000457016	8/16	1188-1189/11025	808-809/8532	270/2843	N/NX	aac/aACac
Val_A	SC00516A	colorectal	APC	GRCh37	5	112128142	112128142	Splice_Site	SNP	G	G	A	c.646-1G>A		p.X216_splice	ENST00000457016		-/11025	646/8532	216/2843
Val_A	SC00516A	colorectal	APC	GRCh37	5	112176350	112176350	Nonsense_Mutation	SNP	C	C	T	c.5059C>T	p.Arg1687Ter	p.R1687*	ENST00000457016	16/16	5439/11025	5059/8532	1687/2843	R/*	Cga/Tga
Val_A	SC00518A	colorectal	APC	GRCh37	5	112175639	112175639	Nonsense_Mutation	SNP	C	C	T	c.4348C>T	p.Arg1450Ter	p.R1450*	ENST00000457016	16/16	4728/11025	4348/8532	1450/2843	R/*	Cga/Tga
Val_A	SC00518A	colorectal	APC	GRCh37	5	112173917	112173917	Nonsense_Mutation	SNP	C	C	T	c.2626C>T	p.Arg876Ter	p.R876*	ENST00000457016	16/16	3006/11025	2626/8532	876/2843	R/*	Cga/Tga
Val_A	SC00520A	colorectal	APC	GRCh37	5	112163682	112163685	Frame_Shift_Del	DEL	TGAA	TGAA	-	c.1605_1608delTGAA	p.Glu536ValfsTer12	p.E536Vfs*12	ENST00000457016	13/16	1985-1988/11025	1605-1608/8532	535-536/2843	SE/X	tcTGAA/tc
Val_A	SC00520A	colorectal	APC	GRCh37	5	112174154	112174154	Nonsense_Mutation	SNP	G	G	T	c.2863G>T	p.Glu955Ter	p.E955*	ENST00000457016	16/16	3243/11025	2863/8532	955/2843	E/*	Gaa/Taa
Val_A	SC00521A	colorectal	APC	GRCh37	5	112175524	112175524	Frame_Shift_Del	DEL	T	T	-	c.4233delT	p.Ser1411ArgfsTer4	p.S1411Rfs*4	ENST00000457016	16/16	4613/11025	4233/8532	1411/2843	S/X	agT/ag
Val_A	SC00521A	colorectal	APC	GRCh37	5	112173560	112173560	Nonsense_Mutation	SNP	C	C	T	c.2269C>T	p.Gln757Ter	p.Q757*	ENST00000457016	16/16	2649/11025	2269/8532	757/2843	Q/*	Caa/Taa
Val_A	SC00522A	colorectal	APC	GRCh37	5	112176017	112176017	Frame_Shift_Del	DEL	G	G	-	c.4726delG	p.Glu1576LysfsTer74	p.E1576Kfs*74	ENST00000457016	16/16	5106/11025	4726/8532	1576/2843	E/X	Gaa/aa
Val_A	SC00522A	colorectal	APC	GRCh37	5	112173917	112173917	Nonsense_Mutation	SNP	C	C	T	c.2626C>T	p.Arg876Ter	p.R876*	ENST00000457016	16/16	3006/11025	2626/8532	876/2843	R/*	Cga/Tga
Val_A	SC00523A	colorectal	APC	GRCh37	5	112175513	112175513	Nonsense_Mutation	SNP	G	G	T	c.4222G>T	p.Glu1408Ter	p.E1408*	ENST00000457016	16/16	4602/11025	4222/8532	1408/2843	E/*	Gaa/Taa
Val_A	SC00524A	colorectal	APC	GRCh37	5	112173704	112173704	Nonsense_Mutation	SNP	C	C	T	c.2413C>T	p.Arg805Ter	p.R805*	ENST00000457016	16/16	2793/11025	2413/8532	805/2843	R/*	Cga/Tga
Val_A	SC00525A	colorectal	APC	GRCh37	5	112128191	112128191	Nonsense_Mutation	SNP	C	C	T	c.694C>T	p.Arg232Ter	p.R232*	ENST00000457016	7/16	1074/11025	694/8532	232/2843	R/*	Cga/Tga
Val_A	SC00526A	colorectal	APC	GRCh37	5	112175612	112175613	Frame_Shift_Ins	INS	-	-	CACCT	c.4323_4327dupACCTC	p.Pro1443HisfsTer32	p.P1443Hfs*32	ENST00000457016	16/16	4701-4702/11025	4321-4322/8532	1441/2843	P/PPX	cca/cCACCTca
Val_A	SC00527A	colorectal	APC	GRCh37	5	112173994	112174009	Frame_Shift_Del	DEL	GGAAGACAGAAGTTCT	GGAAGACAGAAGTTCT	-	c.2705_2720delAAGACAGAAGTTCTGG	p.Glu902GlyfsTer9	p.E902Gfs*9	ENST00000457016	16/16	3083-3098/11025	2703-2718/8532	901-906/2843	QEDRSS/X	caGGAAGACAGAAGTTCT/ca
Val_A	SC00527A	colorectal	APC	GRCh37	5	112175969	112175970	Frame_Shift_Ins	INS	-	-	A	c.4682dupA	p.Asp1562GlyfsTer5	p.D1562Gfs*5	ENST00000457016	16/16	5058-5059/11025	4678-4679/8532	1560/2843	E/EX	gaa/gAaa
Val_A	SC00528A	colorectal	APC	GRCh37	5	112128143	112128143	Nonsense_Mutation	SNP	C	C	T	c.646C>T	p.Arg216Ter	p.R216*	ENST00000457016	7/16	1026/11025	646/8532	216/2843	R/*	Cga/Tga
Val_A	SC00529A	colorectal	APC	GRCh37	5	112175629	112175629	Frame_Shift_Del	DEL	T	T	-	c.4338delT	p.Gln1447LysfsTer26	p.Q1447Kfs*26	ENST00000457016	16/16	4718/11025	4338/8532	1446/2843	A/X	gcT/gc
Val_A	SC00530A	colorectal	APC	GRCh37	5	112163701	112163701	Nonsense_Mutation	SNP	C	C	T	c.1624C>T	p.Gln542Ter	p.Q542*	ENST00000457016	13/16	2004/11025	1624/8532	542/2843	Q/*	Cag/Tag
Val_A	SC00531A	colorectal	APC	GRCh37	5	112175349	112175350	Frame_Shift_Del	DEL	AA	AA	-	c.4058_4059delAA	p.Glu1353ValfsTer21	p.E1353Vfs*21	ENST00000457016	16/16	4438-4439/11025	4058-4059/8532	1353/2843	E/X	gAA/g
Val_A	SC00531A	colorectal	APC	GRCh37	5	112128143	112128143	Nonsense_Mutation	SNP	C	C	T	c.646C>T	p.Arg216Ter	p.R216*	ENST00000457016	7/16	1026/11025	646/8532	216/2843	R/*	Cga/Tga
Val_A	SC00532A	colorectal	RNF43	GRCh37	17	56440943	56440943	Nonsense_Mutation	SNP	G	G	A	c.394C>T	p.Arg132Ter	p.R132*	ENST00000584437	3/9	2350/5575	394/2352	132/783	R/*	Cga/Tga
Val_A	SC00533A	colorectal	RNF43	GRCh37	17	56440888	56440915	Frame_Shift_Del	DEL	TGCTCAGCAGCAGCTCGATCCTCAGTGA	TGCTCAGCAGCAGCTCGATCCTCAGTGA	-	c.422_449delTCACTGAGGATCGAGCTGCTGCTGAGCA	p.Ile141SerfsTer8	p.I141Sfs*8	ENST00000584437	3/9	2378-2405/5575	422-449/2352	141-150/783	ITEDRAAAEQ/X	aTCACTGAGGATCGAGCTGCTGCTGAGCAg/ag
Val_A	SC00534A	colorectal	APC	GRCh37	5	112175639	112175639	Nonsense_Mutation	SNP	C	C	T	c.4348C>T	p.Arg1450Ter	p.R1450*	ENST00000457016	16/16	4728/11025	4348/8532	1450/2843	R/*	Cga/Tga
Polyp	SC00755A	colorectal	APC	GRCh37	5	112175153	112175153	Nonsense_Mutation	SNP	G	G	T	c.3862G>T	p.Gly1288Ter	p.G1288*	ENST00000457016	16/16	4242/11025	3862/8532	1288/2843	G/*	Gga/Tga
Polyp	SC00756A	colorectal	APC	GRCh37	5	112175639	112175639	Nonsense_Mutation	SNP	C	C	T	c.4348C>T	p.Arg1450Ter	p.R1450*	ENST00000457016	16/16	4728/11025	4348/8532	1450/2843	R/*	Cga/Tga
Polyp	SC00758A	colorectal	CTNNB1	GRCh37	3	41266101	41266101	Missense_Mutation	SNP	C	C	T	c.98C>T	p.Ser33Phe	p.S33F	ENST00000349496	3/15	378/3729	98/2346	33/781	S/F	tCt/tTt
Polyp	SC00759A	colorectal	APC	GRCh37	5	112175675	112175676	Frame_Shift_Ins	INS	-	-	AG	c.4393_4394dupAG	p.Ser1465ArgfsTer9	p.S1465Rfs*9	ENST00000457016	16/16	4764-4765/11025	4384-4385/8532	1462/2843	K/KX	aag/aAGag
Polyp	SC00760A	colorectal	APC	GRCh37	5	112173704	112173704	Nonsense_Mutation	SNP	C	C	T	c.2413C>T	p.Arg805Ter	p.R805*	ENST00000457016	16/16	2793/11025	2413/8532	805/2843	R/*	Cga/Tga
Polyp	SC00760A	colorectal	APC	GRCh37	5	112175951	112175952	Frame_Shift_Ins	INS	-	-	A	c.4666dupA	p.Thr1556AsnfsTer3	p.T1556Nfs*3	ENST00000457016	16/16	5040-5041/11025	4660-4661/8532	1554/2843	E/EX	gaa/gAaa
Polyp	SC00761A	colorectal	APC	GRCh37	5	112151261	112151261	Nonsense_Mutation	SNP	C	C	T	c.904C>T	p.Arg302Ter	p.R302*	ENST00000457016	9/16	1284/11025	904/8532	302/2843	R/*	Cga/Tga
Polyp	SC00761A	colorectal	APC	GRCh37	5	112175569	112175576	Frame_Shift_Del	DEL	CCCTGGAC	CCCTGGAC	-	c.4278_4285delCCCTGGAC	p.Ser1426ArgfsTer9	p.S1426Rfs*9	ENST00000457016	16/16	4658-4665/11025	4278-4285/8532	1426-1429/2843	SPGQ/RX	agCCCTGGACaa/agaa
Polyp	SC00764A	colorectal	RNF43	GRCh37	17	56436128	56436128	Nonsense_Mutation	SNP	G	G	A	c.1009C>T	p.Arg337Ter	p.R337*	ENST00000584437	8/9	2965/5575	1009/2352	337/783	R/*	Cga/Tga
Polyp	SC00765A	colorectal	APC	GRCh37	5	112175171	112175171	Nonsense_Mutation	SNP	C	C	T	c.3880C>T	p.Gln1294Ter	p.Q1294*	ENST00000457016	16/16	4260/11025	3880/8532	1294/2843	Q/*	Cag/Tag
Polyp	SC00766A	colorectal	APC	GRCh37	5	112174631	112174631	Nonsense_Mutation	SNP	C	C	T	c.3340C>T	p.Arg1114Ter	p.R1114*	ENST00000457016	16/16	3720/11025	3340/8532	1114/2843	R/*	Cga/Tga
Polyp	SC00766A	colorectal	APC	GRCh37	5	112175207	112175207	Nonsense_Mutation	SNP	G	G	T	c.3916G>T	p.Glu1306Ter	p.E1306*	ENST00000457016	16/16	4296/11025	3916/8532	1306/2843	E/*	Gaa/Taa
Polyp	SC00767A	colorectal	APC	GRCh37	5	112170850	112170851	Frame_Shift_Ins	INS	-	-	TGAG	c.1947_1950dupTGAG	p.Asp651Ter	p.D651*	ENST00000457016	15/16	2326-2327/11025	1946-1947/8532	649/2843	N/NEX	aat/aaTGAGt
Polyp	SC00767A	colorectal	APC	GRCh37	5	112175458	112175459	Frame_Shift_Del	DEL	TG	TG	-	c.4168_4169delGT	p.Val1390GlnfsTer4	p.V1390Qfs*4	ENST00000457016	16/16	4547-4548/11025	4167-4168/8532	1389-1390/2843	SV/SX	tcTGtc/tctc
Polyp	SC00768A	colorectal	APC	GRCh37	5	112174096	112174096	Nonsense_Mutation	SNP	C	C	A	c.2805C>A	p.Tyr935Ter	p.Y935*	ENST00000457016	16/16	3185/11025	2805/8532	935/2843	Y/*	taC/taA
Polyp	SC00768A	colorectal	APC	GRCh37	5	112175789	112175789	Frame_Shift_Del	DEL	T	T	-	c.4501delT	p.Ser1501LeufsTer6	p.S1501Lfs*6	ENST00000457016	16/16	4878/11025	4498/8532	1500/2843	F/X	Ttt/tt
Polyp	SC00769A	colorectal	APC	GRCh37	5	112164586	112164586	Nonsense_Mutation	SNP	C	C	T	c.1660C>T	p.Arg554Ter	p.R554*	ENST00000457016	14/16	2040/11025	1660/8532	554/2843	R/*	Cga/Tga
Polyp	SC00769A	colorectal	APC	GRCh37	5	112175487	112175487	Frame_Shift_Del	DEL	G	G	-	c.4196delG	p.Arg1399LeufsTer16	p.R1399Lfs*16	ENST00000457016	16/16	4576/11025	4196/8532	1399/2843	R/X	cGt/ct
Polyp	SC00770A	colorectal	APC	GRCh37	5	112175328	112175328	Nonsense_Mutation	SNP	C	C	A	c.4037C>A	p.Ser1346Ter	p.S1346*	ENST00000457016	16/16	4417/11025	4037/8532	1346/2843	S/*	tCa/tAa
Polyp	SC00770A	colorectal	APC	GRCh37	5	112175212	112175216	Frame_Shift_Del	DEL	AAAAG	AAAAG	-	c.3927_3931delAAAGA	p.Glu1309AspfsTer4	p.E1309Dfs*4	ENST00000457016	16/16	4301-4305/11025	3921-3925/8532	1307-1309/2843	IKE/IX	atAAAAGaa/ataa
Polyp	SC00771A	colorectal	APC	GRCh37	5	112175348	112175348	Nonsense_Mutation	SNP	G	G	T	c.4057G>T	p.Glu1353Ter	p.E1353*	ENST00000457016	16/16	4437/11025	4057/8532	1353/2843	E/*	Gaa/Taa
Polyp	SC00772A	colorectal	APC	GRCh37	5	112175639	112175639	Nonsense_Mutation	SNP	C	C	T	c.4348C>T	p.Arg1450Ter	p.R1450*	ENST00000457016	16/16	4728/11025	4348/8532	1450/2843	R/*	Cga/Tga
Polyp	SC00773A	colorectal	APC	GRCh37	5	112175639	112175639	Nonsense_Mutation	SNP	C	C	T	c.4348C>T	p.Arg1450Ter	p.R1450*	ENST00000457016	16/16	4728/11025	4348/8532	1450/2843	R/*	Cga/Tga
Polyp	SC00773A	colorectal	APC	GRCh37	5	112174112	112174112	Nonsense_Mutation	SNP	G	G	T	c.2821G>T	p.Glu941Ter	p.E941*	ENST00000457016	16/16	3201/11025	2821/8532	941/2843	E/*	Gaa/Taa
Polyp	SC00774A	colorectal	APC	GRCh37	5	112164603	112164604	Frame_Shift_Ins	INS	-	-	A	c.1682dupA	p.Thr562AspfsTer19	p.T562Dfs*19	ENST00000457016	14/16	2057-2058/11025	1677-1678/8532	559-560/2843	-/X	-/A
Polyp	SC00775A	colorectal	APC	GRCh37	5	112170648	112170648	Nonsense_Mutation	SNP	G	G	T	c.1744G>T	p.Glu582Ter	p.E582*	ENST00000457016	15/16	2124/11025	1744/8532	582/2843	E/*	Gaa/Taa
Polyp	SC00776A	colorectal	APC	GRCh37	5	112174438	112174438	Nonsense_Mutation	SNP	G	G	A	c.3147G>A	p.Trp1049Ter	p.W1049*	ENST00000457016	16/16	3527/11025	3147/8532	1049/2843	W/*	tgG/tgA
Polyp	SC00777A	colorectal	APC	GRCh37	5	112175411	112175411	Nonsense_Mutation	SNP	G	G	T	c.4120G>T	p.Glu1374Ter	p.E1374*	ENST00000457016	16/16	4500/11025	4120/8532	1374/2843	E/*	Gaa/Taa
Polyp	SC00778A	colorectal	APC	GRCh37	5	112164616	112164616	Nonsense_Mutation	SNP	C	C	T	c.1690C>T	p.Arg564Ter	p.R564*	ENST00000457016	14/16	2070/11025	1690/8532	564/2843	R/*	Cga/Tga
Polyp	SC00778A	colorectal	APC	GRCh37	5	112175480	112175480	Nonsense_Mutation	SNP	G	G	T	c.4189G>T	p.Glu1397Ter	p.E1397*	ENST00000457016	16/16	4569/11025	4189/8532	1397/2843	E/*	Gag/Tag
Polyp	SC00779A	colorectal	APC	GRCh37	5	112174862	112174862	Nonsense_Mutation	SNP	C	C	T	c.3571C>T	p.Gln1191Ter	p.Q1191*	ENST00000457016	16/16	3951/11025	3571/8532	1191/2843	Q/*	Cag/Tag
Polyp	SC00779A	colorectal	APC	GRCh37	5	112175360	112175360	Nonsense_Mutation	SNP	G	G	T	c.4069G>T	p.Gly1357Ter	p.G1357*	ENST00000457016	16/16	4449/11025	4069/8532	1357/2843	G/*	Gga/Tga
Polyp	SC00780A	colorectal	APC	GRCh37	5	112128143	112128143	Nonsense_Mutation	SNP	C	C	T	c.646C>T	p.Arg216Ter	p.R216*	ENST00000457016	7/16	1026/11025	646/8532	216/2843	R/*	Cga/Tga
Polyp	SC00780A	colorectal	APC	GRCh37	5	112175936	112175936	Nonsense_Mutation	SNP	C	C	T	c.4645C>T	p.Gln1549Ter	p.Q1549*	ENST00000457016	16/16	5025/11025	4645/8532	1549/2843	Q/*	Caa/Taa
Polyp	SC00781A	colorectal	APC	GRCh37	5	112175358	112175358	Nonsense_Mutation	SNP	C	C	A	c.4067C>A	p.Ser1356Ter	p.S1356*	ENST00000457016	16/16	4447/11025	4067/8532	1356/2843	S/*	tCa/tAa
Polyp	SC00782A	colorectal	APC	GRCh37	5	112174760	112174760	Nonsense_Mutation	SNP	G	G	T	c.3469G>T	p.Glu1157Ter	p.E1157*	ENST00000457016	16/16	3849/11025	3469/8532	1157/2843	E/*	Gag/Tag
Polyp	SC00783A	colorectal	APC	GRCh37	5	112173917	112173917	Nonsense_Mutation	SNP	C	C	T	c.2626C>T	p.Arg876Ter	p.R876*	ENST00000457016	16/16	3006/11025	2626/8532	876/2843	R/*	Cga/Tga
Polyp	SC00783A	colorectal	APC	GRCh37	5	112175676	112175677	Frame_Shift_Del	DEL	AG	AG	-	c.4393_4394delAG	p.Ser1465TrpfsTer3	p.S1465Wfs*3	ENST00000457016	16/16	4765-4766/11025	4385-4386/8532	1462/2843	K/X	aAG/a
Polyp	SC00784A	colorectal	APC	GRCh37	5	112175639	112175639	Nonsense_Mutation	SNP	C	C	T	c.4348C>T	p.Arg1450Ter	p.R1450*	ENST00000457016	16/16	4728/11025	4348/8532	1450/2843	R/*	Cga/Tga
Polyp	SC00784A	colorectal	APC	GRCh37	5	112173600	112173600	Nonsense_Mutation	SNP	C	C	A	c.2309C>A	p.Ser770Ter	p.S770*	ENST00000457016	16/16	2689/11025	2309/8532	770/2843	S/*	tCa/tAa
Polyp	SC00785A	colorectal	APC	GRCh37	5	112173917	112173917	Nonsense_Mutation	SNP	C	C	T	c.2626C>T	p.Arg876Ter	p.R876*	ENST00000457016	16/16	3006/11025	2626/8532	876/2843	R/*	Cga/Tga
Polyp	SC00786A	colorectal	APC	GRCh37	5	112175639	112175639	Nonsense_Mutation	SNP	C	C	T	c.4348C>T	p.Arg1450Ter	p.R1450*	ENST00000457016	16/16	4728/11025	4348/8532	1450/2843	R/*	Cga/Tga
Polyp	SC00786A	colorectal	APC	GRCh37	5	112128191	112128191	Nonsense_Mutation	SNP	C	C	T	c.694C>T	p.Arg232Ter	p.R232*	ENST00000457016	7/16	1074/11025	694/8532	232/2843	R/*	Cga/Tga
Polyp	SC00787A	colorectal	APC	GRCh37	5	112175639	112175639	Nonsense_Mutation	SNP	C	C	T	c.4348C>T	p.Arg1450Ter	p.R1450*	ENST00000457016	16/16	4728/11025	4348/8532	1450/2843	R/*	Cga/Tga
Polyp	SC00787A	colorectal	APC	GRCh37	5	112116592	112116592	Nonsense_Mutation	SNP	C	C	T	c.637C>T	p.Arg213Ter	p.R213*	ENST00000457016	6/16	1017/11025	637/8532	213/2843	R/*	Cga/Tga
Polyp	SC00788A	colorectal	APC	GRCh37	5	112173590	112173590	Nonsense_Mutation	SNP	C	C	T	c.2299C>T	p.Gln767Ter	p.Q767*	ENST00000457016	16/16	2679/11025	2299/8532	767/2843	Q/*	Cag/Tag
Polyp	SC00788A	colorectal	APC	GRCh37	5	112175524	112175524	Frame_Shift_Del	DEL	T	T	-	c.4233delT	p.Ser1411ArgfsTer4	p.S1411Rfs*4	ENST00000457016	16/16	4613/11025	4233/8532	1411/2843	S/X	agT/ag
Polyp	SC00789A	colorectal	APC	GRCh37	5	112175390	112175390	Nonsense_Mutation	SNP	C	C	T	c.4099C>T	p.Gln1367Ter	p.Q1367*	ENST00000457016	16/16	4479/11025	4099/8532	1367/2843	Q/*	Cag/Tag
Polyp	SC00790A	colorectal	APC	GRCh37	5	112175576	112175576	Nonsense_Mutation	SNP	C	C	T	c.4285C>T	p.Gln1429Ter	p.Q1429*	ENST00000457016	16/16	4665/11025	4285/8532	1429/2843	Q/*	Caa/Taa
Polyp	SC00790A	colorectal	APC	GRCh37	5	112174156	112174177	Frame_Shift_Del	DEL	ATACAAGAGATCTTCAAATGAT	ATACAAGAGATCTTCAAATGAT	-	c.2865_2886delATACAAGAGATCTTCAAATGAT	p.Tyr956ValfsTer2	p.Y956Vfs*2	ENST00000457016	16/16	3244-3266/11025	2864-2886/8532	955-962/2843	EYKRSSND/X	gAATACAAGAGATCTTCAAATGAT/gA
Polyp	SC00791A	colorectal	APC	GRCh37	5	112128191	112128191	Nonsense_Mutation	SNP	C	C	T	c.694C>T	p.Arg232Ter	p.R232*	ENST00000457016	7/16	1074/11025	694/8532	232/2843	R/*	Cga/Tga
Polyp	SC00791A	colorectal	APC	GRCh37	5	112175303	112175303	Nonsense_Mutation	SNP	C	C	T	c.4012C>T	p.Gln1338Ter	p.Q1338*	ENST00000457016	16/16	4392/11025	4012/8532	1338/2843	Q/*	Cag/Tag
Polyp	SC00792A	colorectal	APC	GRCh37	5	112116556	112116556	Nonsense_Mutation	SNP	G	G	T	c.601G>T	p.Glu201Ter	p.E201*	ENST00000457016	6/16	981/11025	601/8532	201/2843	E/*	Gaa/Taa
Polyp	SC00792A	colorectal	APC	GRCh37	5	112175536	112175536	Frame_Shift_Del	DEL	T	T	-	c.4245delT	p.Ser1415ArgfsTer4	p.S1415Rfs*4	ENST00000457016	16/16	4625/11025	4245/8532	1415/2843	S/X	agT/ag
Polyp	SC00793A	colorectal	APC	GRCh37	5	112128191	112128191	Nonsense_Mutation	SNP	C	C	T	c.694C>T	p.Arg232Ter	p.R232*	ENST00000457016	7/16	1074/11025	694/8532	232/2843	R/*	Cga/Tga
Polyp	SC00793A	colorectal	APC	GRCh37	5	112175600	112175600	Frame_Shift_Del	DEL	A	A	-	c.4312delA	p.Thr1438HisfsTer35	p.T1438Hfs*35	ENST00000457016	16/16	4689/11025	4309/8532	1437/2843	K/X	Aaa/aa
Polyp	SC00794A	colorectal	APC	GRCh37	5	112175639	112175639	Nonsense_Mutation	SNP	C	C	T	c.4348C>T	p.Arg1450Ter	p.R1450*	ENST00000457016	16/16	4728/11025	4348/8532	1450/2843	R/*	Cga/Tga
Polyp	SC00805A	colorectal	APC	GRCh37	5	112176026	112176037	Frame_Shift_Del	DEL	ATTATTTCTGCC	ATTATTTCTGCC	CTAG	c.4735_4746delATTATTTCTGCCinsCTAG	p.Ile1579LeufsTer9	p.I1579Lfs*9	ENST00000457016	16/16	5115-5126/11025	4735-4746/8532	1579-1582/2843	IISA/LX	ATTATTTCTGCC/CTAG
Polyp	SC00809A	colorectal	RNF43	GRCh37	17	56435161	56435161	Frame_Shift_Del	DEL	C	C	-	c.1976delG	p.Gly659ValfsTer41	p.G659Vfs*41	ENST00000584437	8/9	3932/5575	1976/2352	659/783	G/X	gGt/gt
DC_A	TCGA.A6.2671.01	colorectal	APC	GRCh37	5	112174117	112174117	Frame_Shift_Del	DEL	T	T	-	c.2827delT	p.Ser943GlnfsTer12	p.S943Qfs*12	ENST00000457016	16/16	3206/11025	2826/8532	942/2843	N/X	aaT/aa
DC_A	TCGA.A6.2671.01	colorectal	APC	GRCh37	5	112175593	112175614	Frame_Shift_Del	DEL	CAGAAGTAAAACACCTCCACCA	CAGAAGTAAAACACCTCCACCA	-	c.4303_4324delAGAAGTAAAACACCTCCACCAC	p.Arg1435LeufsTer31	p.R1435Lfs*31	ENST00000457016	16/16	4682-4703/11025	4302-4323/8532	1434-1441/2843	SRSKTPPP/X	agCAGAAGTAAAACACCTCCACCA/ag
DC_A	TCGA.A6.2671.01	colorectal	RNF43	GRCh37	17	56435252	56435252	Frame_Shift_Del	DEL	C	C	-	c.1885delG	p.Ala629ProfsTer71	p.A629Pfs*71	ENST00000584437	8/9	3841/5575	1885/2352	629/783	A/X	Gcc/cc
DC_A	TCGA.A6.2674.01	colorectal	APC	GRCh37	5	112164586	112164586	Nonsense_Mutation	SNP	C	C	T	c.1660C>T	p.Arg554Ter	p.R554*	ENST00000457016	14/16	2040/11025	1660/8532	554/2843	R/*	Cga/Tga
DC_A	TCGA.A6.2675.01	colorectal	APC	GRCh37	5	112154942	112154942	Nonsense_Mutation	SNP	C	C	T	c.1213C>T	p.Arg405Ter	p.R405*	ENST00000457016	10/16	1593/11025	1213/8532	405/2843	R/*	Cga/Tga
DC_A	TCGA.A6.2675.01	colorectal	APC	GRCh37	5	112116559	112116560	Frame_Shift_Ins	INS	-	-	A	c.606dupA	p.Gln203ThrfsTer49	p.Q203Tfs*49	ENST00000457016	6/16	984-985/11025	604-605/8532	202/2843	E/EX	gaa/gAaa
DC_A	TCGA.A6.3807.01	colorectal	APC	GRCh37	5	112116592	112116592	Nonsense_Mutation	SNP	C	C	T	c.637C>T	p.Arg213Ter	p.R213*	ENST00000457016	6/16	1017/11025	637/8532	213/2843	R/*	Cga/Tga
DC_A	TCGA.A6.3810.01	colorectal	APC	GRCh37	5	112175203	112175203	Frame_Shift_Del	DEL	A	A	-	c.3912delA	p.Ile1304MetfsTer4	p.I1304Mfs*4	ENST00000457016	16/16	4292/11025	3912/8532	1304/2843	I/X	atA/at
DC_A	TCGA.A6.5656.01	colorectal	APC	GRCh37	5	112164616	112164616	Nonsense_Mutation	SNP	C	C	T	c.1690C>T	p.Arg564Ter	p.R564*	ENST00000457016	14/16	2070/11025	1690/8532	564/2843	R/*	Cga/Tga
DC_A	TCGA.A6.5656.01	colorectal	APC	GRCh37	5	112175605	112175605	Frame_Shift_Del	DEL	A	A	-	c.4314delA	p.Pro1439LeufsTer34	p.P1439Lfs*34	ENST00000457016	16/16	4694/11025	4314/8532	1438/2843	T/X	acA/ac
DC_A	TCGA.A6.5659.01	colorectal	APC	GRCh37	5	112173388	112173388	Nonsense_Mutation	SNP	G	G	A	c.2097G>A	p.Trp699Ter	p.W699*	ENST00000457016	16/16	2477/11025	2097/8532	699/2843	W/*	tgG/tgA
DC_A	TCGA.A6.5660.01	colorectal	APC	GRCh37	5	112116592	112116592	Nonsense_Mutation	SNP	C	C	T	c.637C>T	p.Arg213Ter	p.R213*	ENST00000457016	6/16	1017/11025	637/8532	213/2843	R/*	Cga/Tga
DC_A	TCGA.A6.5661.01	colorectal	CTNNB1	GRCh37	3	41274897	41274897	Missense_Mutation	SNP	T	T	C	c.1147T>C	p.Trp383Arg	p.W383R	ENST00000349496	8/15	1427/3729	1147/2346	383/781	W/R	Tgg/Cgg
DC_A	TCGA.A6.5664.01	colorectal	APC	GRCh37	5	112175639	112175639	Nonsense_Mutation	SNP	C	C	T	c.4348C>T	p.Arg1450Ter	p.R1450*	ENST00000457016	16/16	4728/11025	4348/8532	1450/2843	R/*	Cga/Tga
DC_A	TCGA.A6.5664.01	colorectal	APC	GRCh37	5	112116592	112116592	Nonsense_Mutation	SNP	C	C	T	c.637C>T	p.Arg213Ter	p.R213*	ENST00000457016	6/16	1017/11025	637/8532	213/2843	R/*	Cga/Tga
DC_A	TCGA.A6.5665.01	colorectal	RNF43	GRCh37	17	56435161	56435161	Frame_Shift_Del	DEL	C	C	-	c.1976delG	p.Gly659ValfsTer41	p.G659Vfs*41	ENST00000584437	8/9	3932/5575	1976/2352	659/783	G/X	gGt/gt
DC_A	TCGA.A6.5666.01	colorectal	APC	GRCh37	5	112116592	112116592	Nonsense_Mutation	SNP	C	C	T	c.637C>T	p.Arg213Ter	p.R213*	ENST00000457016	6/16	1017/11025	637/8532	213/2843	R/*	Cga/Tga
DC_A	TCGA.A6.5667.01	colorectal	APC	GRCh37	5	112175423	112175423	Nonsense_Mutation	SNP	C	C	T	c.4132C>T	p.Gln1378Ter	p.Q1378*	ENST00000457016	16/16	4512/11025	4132/8532	1378/2843	Q/*	Cag/Tag
DC_A	TCGA.A6.6137.01	colorectal	APC	GRCh37	5	112162891	112162891	Nonsense_Mutation	SNP	C	C	T	c.1495C>T	p.Arg499Ter	p.R499*	ENST00000457016	12/16	1875/11025	1495/8532	499/2843	R/*	Cga/Tga
DC_A	TCGA.A6.6138.01	colorectal	APC	GRCh37	5	112175480	112175480	Nonsense_Mutation	SNP	G	G	T	c.4189G>T	p.Glu1397Ter	p.E1397*	ENST00000457016	16/16	4569/11025	4189/8532	1397/2843	E/*	Gag/Tag
DC_A	TCGA.A6.6140.01	colorectal	APC	GRCh37	5	112175480	112175480	Nonsense_Mutation	SNP	G	G	T	c.4189G>T	p.Glu1397Ter	p.E1397*	ENST00000457016	16/16	4569/11025	4189/8532	1397/2843	E/*	Gag/Tag
DC_A	TCGA.A6.6141.01	colorectal	APC	GRCh37	5	112175856	112175856	Nonsense_Mutation	SNP	T	T	G	c.4565T>G	p.Leu1522Ter	p.L1522*	ENST00000457016	16/16	4945/11025	4565/8532	1522/2843	L/*	tTa/tGa
DC_A	TCGA.A6.6142.01	colorectal	APC	GRCh37	5	112174117	112174117	Frame_Shift_Del	DEL	T	T	-	c.2827delT	p.Ser943GlnfsTer12	p.S943Qfs*12	ENST00000457016	16/16	3206/11025	2826/8532	942/2843	N/X	aaT/aa
DC_A	TCGA.A6.6142.01	colorectal	APC	GRCh37	5	112175507	112175507	Nonsense_Mutation	SNP	C	C	T	c.4216C>T	p.Gln1406Ter	p.Q1406*	ENST00000457016	16/16	4596/11025	4216/8532	1406/2843	Q/*	Cag/Tag
DC_A	TCGA.A6.6648.01	colorectal	APC	GRCh37	5	112175221	112175221	Frame_Shift_Del	DEL	G	G	-	c.3930delG	p.Ile1311LeufsTer10	p.I1311Lfs*10	ENST00000457016	16/16	4310/11025	3930/8532	1310/2843	K/X	aaG/aa
DC_A	TCGA.A6.6649.01	colorectal	RNF43	GRCh37	17	56435861	56435861	Nonsense_Mutation	SNP	G	G	A	c.1276C>T	p.Gln426Ter	p.Q426*	ENST00000584437	8/9	3232/5575	1276/2352	426/783	Q/*	Cag/Tag
DC_A	TCGA.A6.6650.01	colorectal	APC	GRCh37	5	112175212	112175216	Frame_Shift_Del	DEL	AAAAG	AAAAG	-	c.3927_3931delAAAGA	p.Glu1309AspfsTer4	p.E1309Dfs*4	ENST00000457016	16/16	4301-4305/11025	3921-3925/8532	1307-1309/2843	IKE/IX	atAAAAGaa/ataa
DC_A	TCGA.A6.6650.01	colorectal	APC	GRCh37	5	112175511	112175512	Frame_Shift_Ins	INS	-	-	TGAAA	c.4224_4225insATGAA	p.Pro1409MetfsTer8	p.P1409Mfs*8	ENST00000457016	16/16	4600-4601/11025	4220-4221/8532	1407/2843	S/SEX	agt/agTGAAAt
DC_A	TCGA.A6.6651.01	colorectal	APC	GRCh37	5	112175212	112175216	Frame_Shift_Del	DEL	AAAAG	AAAAG	-	c.3927_3931delAAAGA	p.Glu1309AspfsTer4	p.E1309Dfs*4	ENST00000457016	16/16	4301-4305/11025	3921-3925/8532	1307-1309/2843	IKE/IX	atAAAAGaa/ataa
DC_A	TCGA.A6.6653.01	colorectal	RNF43	GRCh37	17	56435161	56435162	Frame_Shift_Del	DEL	CC	CC	-	c.1975_1976delGG	p.Gly659SerfsTer87	p.G659Sfs*87	ENST00000584437	8/9	3931-3932/5575	1975-1976/2352	659/783	G/X	GGt/t
DC_A	TCGA.A6.6654.01	colorectal	APC	GRCh37	5	112175390	112175390	Nonsense_Mutation	SNP	C	C	T	c.4099C>T	p.Gln1367Ter	p.Q1367*	ENST00000457016	16/16	4479/11025	4099/8532	1367/2843	Q/*	Cag/Tag
DC_A	TCGA.A6.6780.01	colorectal	CTNNB1	GRCh37	3	41266137	41266137	Missense_Mutation	SNP	C	C	T	c.134C>T	p.Ser45Phe	p.S45F	ENST00000349496	3/15	414/3729	134/2346	45/781	S/F	tCt/tTt
DC_A	TCGA.A6.6781.01	colorectal	RNF43	GRCh37	17	56435161	56435161	Frame_Shift_Del	DEL	C	C	-	c.1976delG	p.Gly659ValfsTer41	p.G659Vfs*41	ENST00000584437	8/9	3932/5575	1976/2352	659/783	G/X	gGt/gt
DC_A	TCGA.A6.6782.01	colorectal	APC	GRCh37	5	112175246	112175246	Frame_Shift_Del	DEL	C	C	-	c.3956delC	p.Pro1319LeufsTer2	p.P1319Lfs*2	ENST00000457016	16/16	4335/11025	3955/8532	1319/2843	P/X	Cct/ct
DC_A	TCGA.A6.6782.01	colorectal	APC	GRCh37	5	112174043	112174043	Nonsense_Mutation	SNP	G	G	T	c.2752G>T	p.Glu918Ter	p.E918*	ENST00000457016	16/16	3132/11025	2752/8532	918/2843	E/*	Gag/Tag
DC_A	TCGA.AA.3489.01	colorectal	APC	GRCh37	5	112175466	112175466	Nonsense_Mutation	SNP	C	C	A	c.4175C>A	p.Ser1392Ter	p.S1392*	ENST00000457016	16/16	4555/11025	4175/8532	1392/2843	S/*	tCa/tAa
DC_A	TCGA.AA.3502.01	colorectal	APC	GRCh37	5	112174631	112174631	Nonsense_Mutation	SNP	C	C	T	c.3340C>T	p.Arg1114Ter	p.R1114*	ENST00000457016	16/16	3720/11025	3340/8532	1114/2843	R/*	Cga/Tga
DC_A	TCGA.AA.3510.01	colorectal	APC	GRCh37	5	112174631	112174631	Nonsense_Mutation	SNP	C	C	T	c.3340C>T	p.Arg1114Ter	p.R1114*	ENST00000457016	16/16	3720/11025	3340/8532	1114/2843	R/*	Cga/Tga
DC_A	TCGA.AA.3511.01	colorectal	APC	GRCh37	5	112175301	112175302	Frame_Shift_Del	DEL	TG	TG	-	c.4010_4011delTG	p.Leu1337ProfsTer4	p.L1337Pfs*4	ENST00000457016	16/16	4390-4391/11025	4010-4011/8532	1337/2843	L/X	cTG/c
DC_A	TCGA.AA.3521.01	colorectal	APC	GRCh37	5	112175757	112175757	Nonsense_Mutation	SNP	T	T	A	c.4466T>A	p.Leu1489Ter	p.L1489*	ENST00000457016	16/16	4846/11025	4466/8532	1489/2843	L/*	tTa/tAa
DC_A	TCGA.AA.3522.01	colorectal	APC	GRCh37	5	112175521	112175521	Nonsense_Mutation	SNP	C	C	A	c.4230C>A	p.Cys1410Ter	p.C1410*	ENST00000457016	16/16	4610/11025	4230/8532	1410/2843	C/*	tgC/tgA
DC_A	TCGA.AA.3524.01	colorectal	APC	GRCh37	5	112116601	112116601	Splice_Site	SNP	G	G	A	c.645+1G>A		p.X215_splice	ENST00000457016		-/11025	645/8532	215/2843
DC_A	TCGA.AA.3538.01	colorectal	APC	GRCh37	5	112174106	112174106	Nonsense_Mutation	SNP	A	A	T	c.2815A>T	p.Lys939Ter	p.K939*	ENST00000457016	16/16	3195/11025	2815/8532	939/2843	K/*	Aag/Tag
DC_A	TCGA.AA.3553.01	colorectal	APC	GRCh37	5	112175235	112175235	Nonsense_Mutation	SNP	C	C	A	c.3944C>A	p.Ser1315Ter	p.S1315*	ENST00000457016	16/16	4324/11025	3944/8532	1315/2843	S/*	tCa/tAa
DC_A	TCGA.AA.3655.01	colorectal	APC	GRCh37	5	112175621	112175621	Nonsense_Mutation	SNP	C	C	T	c.4330C>T	p.Gln1444Ter	p.Q1444*	ENST00000457016	16/16	4710/11025	4330/8532	1444/2843	Q/*	Caa/Taa
DC_A	TCGA.AA.3660.01	colorectal	APC	GRCh37	5	112175390	112175390	Nonsense_Mutation	SNP	C	C	T	c.4099C>T	p.Gln1367Ter	p.Q1367*	ENST00000457016	16/16	4479/11025	4099/8532	1367/2843	Q/*	Cag/Tag
DC_A	TCGA.AA.3662.01	colorectal	APC	GRCh37	5	112175341	112175342	Frame_Shift_Ins	INS	-	-	G	c.4051dupG	p.Ala1351GlyfsTer3	p.A1351Gfs*3	ENST00000457016	16/16	4430-4431/11025	4050-4051/8532	1350-1351/2843	-/X	-/G
DC_A	TCGA.AA.3663.01	colorectal	CTNNB1	GRCh37	3	41266124	41266124	Missense_Mutation	SNP	A	A	G	c.121A>G	p.Thr41Ala	p.T41A	ENST00000349496	3/15	401/3729	121/2346	41/781	T/A	Acc/Gcc
DC_A	TCGA.AA.3663.01	colorectal	RNF43	GRCh37	17	56435161	56435161	Frame_Shift_Del	DEL	C	C	-	c.1976delG	p.Gly659ValfsTer41	p.G659Vfs*41	ENST00000584437	8/9	3932/5575	1976/2352	659/783	G/X	gGt/gt
DC_A	TCGA.AA.3666.01	colorectal	APC	GRCh37	5	112175351	112175351	Frame_Shift_Del	DEL	T	T	-	c.4063delT	p.Ser1355LeufsTer60	p.S1355Lfs*60	ENST00000457016	16/16	4440/11025	4060/8532	1354/2843	F/X	Ttt/tt
DC_A	TCGA.AA.3667.01	colorectal	APC	GRCh37	5	112164616	112164616	Nonsense_Mutation	SNP	C	C	T	c.1690C>T	p.Arg564Ter	p.R564*	ENST00000457016	14/16	2070/11025	1690/8532	564/2843	R/*	Cga/Tga
DC_A	TCGA.AA.3667.01	colorectal	APC	GRCh37	5	112175490	112175490	Frame_Shift_Del	DEL	C	C	-	c.4199delC	p.Ser1400Ter	p.S1400*	ENST00000457016	16/16	4579/11025	4199/8532	1400/2843	S/X	tCg/tg
DC_A	TCGA.AA.3673.01	colorectal	APC	GRCh37	5	112174268	112174268	Nonsense_Mutation	SNP	A	A	T	c.2977A>T	p.Lys993Ter	p.K993*	ENST00000457016	16/16	3357/11025	2977/8532	993/2843	K/*	Aag/Tag
DC_A	TCGA.AA.3678.01	colorectal	APC	GRCh37	5	112175223	112175224	Frame_Shift_Del	DEL	TT	TT	-	c.3932_3933delTT	p.Ile1311ArgfsTer3	p.I1311Rfs*3	ENST00000457016	16/16	4312-4313/11025	3932-3933/8532	1311/2843	I/X	aTT/a
DC_A	TCGA.AA.3679.01	colorectal	APC	GRCh37	5	112128143	112128143	Nonsense_Mutation	SNP	C	C	T	c.646C>T	p.Arg216Ter	p.R216*	ENST00000457016	7/16	1026/11025	646/8532	216/2843	R/*	Cga/Tga
DC_A	TCGA.AA.3679.01	colorectal	APC	GRCh37	5	112175212	112175216	Frame_Shift_Del	DEL	AAAAG	AAAAG	-	c.3927_3931delAAAGA	p.Glu1309AspfsTer4	p.E1309Dfs*4	ENST00000457016	16/16	4301-4305/11025	3921-3925/8532	1307-1309/2843	IKE/IX	atAAAAGaa/ataa
DC_A	TCGA.AA.3680.01	colorectal	APC	GRCh37	5	112176009	112176009	Frame_Shift_Del	DEL	A	A	-	c.4720delA	p.Ile1574TyrfsTer2	p.I1574Yfs*2	ENST00000457016	16/16	5098/11025	4718/8532	1573/2843	E/X	gAa/ga
DC_A	TCGA.AA.3680.01	colorectal	APC	GRCh37	5	112174779	112174779	Frame_Shift_Del	DEL	G	G	-	c.3488delG	p.Ser1163ThrfsTer2	p.S1163Tfs*2	ENST00000457016	16/16	3868/11025	3488/8532	1163/2843	S/X	aGc/ac
DC_A	TCGA.AA.3681.01	colorectal	APC	GRCh37	5	112175639	112175639	Nonsense_Mutation	SNP	C	C	T	c.4348C>T	p.Arg1450Ter	p.R1450*	ENST00000457016	16/16	4728/11025	4348/8532	1450/2843	R/*	Cga/Tga
DC_A	TCGA.AA.3681.01	colorectal	APC	GRCh37	5	112174061	112174061	Nonsense_Mutation	SNP	A	A	T	c.2770A>T	p.Arg924Ter	p.R924*	ENST00000457016	16/16	3150/11025	2770/8532	924/2843	R/*	Aga/Tga
DC_A	TCGA.AA.3684.01	colorectal	APC	GRCh37	5	112174241	112174241	Nonsense_Mutation	SNP	G	G	T	c.2950G>T	p.Glu984Ter	p.E984*	ENST00000457016	16/16	3330/11025	2950/8532	984/2843	E/*	Gaa/Taa
DC_A	TCGA.AA.3685.01	colorectal	APC	GRCh37	5	112175399	112175399	Nonsense_Mutation	SNP	A	A	T	c.4108A>T	p.Lys1370Ter	p.K1370*	ENST00000457016	16/16	4488/11025	4108/8532	1370/2843	K/*	Aaa/Taa
DC_A	TCGA.AA.3685.01	colorectal	APC	GRCh37	5	112174223	112174223	Nonsense_Mutation	SNP	C	C	T	c.2932C>T	p.Gln978Ter	p.Q978*	ENST00000457016	16/16	3312/11025	2932/8532	978/2843	Q/*	Caa/Taa
DC_A	TCGA.AA.3688.01	colorectal	APC	GRCh37	5	112174112	112174112	Nonsense_Mutation	SNP	G	G	T	c.2821G>T	p.Glu941Ter	p.E941*	ENST00000457016	16/16	3201/11025	2821/8532	941/2843	E/*	Gaa/Taa
DC_A	TCGA.AA.3692.01	colorectal	APC	GRCh37	5	112173704	112173704	Nonsense_Mutation	SNP	C	C	T	c.2413C>T	p.Arg805Ter	p.R805*	ENST00000457016	16/16	2793/11025	2413/8532	805/2843	R/*	Cga/Tga
DC_A	TCGA.AA.3692.01	colorectal	APC	GRCh37	5	112175411	112175411	Nonsense_Mutation	SNP	G	G	T	c.4120G>T	p.Glu1374Ter	p.E1374*	ENST00000457016	16/16	4500/11025	4120/8532	1374/2843	E/*	Gaa/Taa
DC_A	TCGA.AA.3693.01	colorectal	APC	GRCh37	5	112175175	112175175	Frame_Shift_Del	DEL	A	A	-	c.3885delA	p.Ala1296GlnfsTer9	p.A1296Qfs*9	ENST00000457016	16/16	4264/11025	3884/8532	1295/2843	E/X	gAa/ga
DC_A	TCGA.AA.3696.01	colorectal	APC	GRCh37	5	112175446	112175447	Frame_Shift_Ins	INS	-	-	AGAT	c.4156_4159dupAGAT	p.Cys1387Ter	p.C1387*	ENST00000457016	16/16	4535-4536/11025	4155-4156/8532	1385-1386/2843	-/RX	-/AGAT
DC_A	TCGA.AA.3697.01	colorectal	APC	GRCh37	5	112173917	112173917	Nonsense_Mutation	SNP	C	C	T	c.2626C>T	p.Arg876Ter	p.R876*	ENST00000457016	16/16	3006/11025	2626/8532	876/2843	R/*	Cga/Tga
DC_A	TCGA.AA.3697.01	colorectal	APC	GRCh37	5	112175216	112175216	Nonsense_Mutation	SNP	G	G	T	c.3925G>T	p.Glu1309Ter	p.E1309*	ENST00000457016	16/16	4305/11025	3925/8532	1309/2843	E/*	Gaa/Taa
DC_A	TCGA.AA.3713.01	colorectal	APC	GRCh37	5	112175675	112175676	Frame_Shift_Ins	INS	-	-	AG	c.4393_4394dupAG	p.Ser1465ArgfsTer9	p.S1465Rfs*9	ENST00000457016	16/16	4764-4765/11025	4384-4385/8532	1462/2843	K/KX	aag/aAGag
DC_A	TCGA.AA.3715.01	colorectal	RNF43	GRCh37	17	56435161	56435161	Frame_Shift_Del	DEL	C	C	-	c.1976delG	p.Gly659ValfsTer41	p.G659Vfs*41	ENST00000584437	8/9	3932/5575	1976/2352	659/783	G/X	gGt/gt
DC_A	TCGA.AA.3812.01	colorectal	APC	GRCh37	5	112175552	112175552	Frame_Shift_Del	DEL	A	A	-	c.4261delA	p.Ser1421ValfsTer52	p.S1421Vfs*52	ENST00000457016	16/16	4641/11025	4261/8532	1421/2843	S/X	Agt/gt
DC_A	TCGA.AA.3814.01	colorectal	APC	GRCh37	5	112175513	112175513	Nonsense_Mutation	SNP	G	G	T	c.4222G>T	p.Glu1408Ter	p.E1408*	ENST00000457016	16/16	4602/11025	4222/8532	1408/2843	E/*	Gaa/Taa
DC_A	TCGA.AA.3818.01	colorectal	APC	GRCh37	5	112174170	112174171	Frame_Shift_Ins	INS	-	-	AA	c.2881_2882dupAA	p.Asn961LysfsTer5	p.N961Kfs*5	ENST00000457016	16/16	3259-3260/11025	2879-2880/8532	960/2843	S/SX	tca/tcAAa
DC_A	TCGA.AA.3818.01	colorectal	APC	GRCh37	5	112175524	112175524	Frame_Shift_Del	DEL	T	T	-	c.4233delT	p.Ser1411ArgfsTer4	p.S1411Rfs*4	ENST00000457016	16/16	4613/11025	4233/8532	1411/2843	S/X	agT/ag
DC_A	TCGA.AA.3837.01	colorectal	APC	GRCh37	5	112175171	112175171	Nonsense_Mutation	SNP	C	C	T	c.3880C>T	p.Gln1294Ter	p.Q1294*	ENST00000457016	16/16	4260/11025	3880/8532	1294/2843	Q/*	Cag/Tag
DC_A	TCGA.AA.3837.01	colorectal	APC	GRCh37	5	112116525	112116526	Frame_Shift_Ins	INS	-	-	T	c.571dupT	p.Tyr191LeufsTer2	p.Y191Lfs*2	ENST00000457016	6/16	950-951/11025	570-571/8532	190-191/2843	-/X	-/T
DC_A	TCGA.AA.3846.01	colorectal	APC	GRCh37	5	112175423	112175423	Nonsense_Mutation	SNP	C	C	T	c.4132C>T	p.Gln1378Ter	p.Q1378*	ENST00000457016	16/16	4512/11025	4132/8532	1378/2843	Q/*	Cag/Tag
DC_A	TCGA.AA.3848.01	colorectal	APC	GRCh37	5	112128143	112128143	Nonsense_Mutation	SNP	C	C	T	c.646C>T	p.Arg216Ter	p.R216*	ENST00000457016	7/16	1026/11025	646/8532	216/2843	R/*	Cga/Tga
DC_A	TCGA.AA.3852.01	colorectal	APC	GRCh37	5	112175553	112175553	Frame_Shift_Del	DEL	G	G	-	c.4262delG	p.Ser1421MetfsTer52	p.S1421Mfs*52	ENST00000457016	16/16	4642/11025	4262/8532	1421/2843	S/X	aGt/at
DC_A	TCGA.AA.3854.01	colorectal	APC	GRCh37	5	112175484	112175484	Frame_Shift_Del	DEL	G	G	-	c.4193delG	p.Ser1398IlefsTer17	p.S1398Ifs*17	ENST00000457016	16/16	4573/11025	4193/8532	1398/2843	S/X	aGt/at
DC_A	TCGA.AA.3855.01	colorectal	APC	GRCh37	5	112175351	112175351	Frame_Shift_Del	DEL	T	T	-	c.4063delT	p.Ser1355LeufsTer60	p.S1355Lfs*60	ENST00000457016	16/16	4440/11025	4060/8532	1354/2843	F/X	Ttt/tt
DC_A	TCGA.AA.3856.01	colorectal	APC	GRCh37	5	112173917	112173917	Nonsense_Mutation	SNP	C	C	T	c.2626C>T	p.Arg876Ter	p.R876*	ENST00000457016	16/16	3006/11025	2626/8532	876/2843	R/*	Cga/Tga
DC_A	TCGA.AA.3858.01	colorectal	APC	GRCh37	5	112175346	112175346	Frame_Shift_Del	DEL	T	T	-	c.4056delT	p.Glu1353AsnfsTer62	p.E1353Nfs*62	ENST00000457016	16/16	4435/11025	4055/8532	1352/2843	V/X	gTt/gt
DC_A	TCGA.AA.3860.01	colorectal	APC	GRCh37	5	112128201	112128201	Nonsense_Mutation	SNP	T	T	A	c.704T>A	p.Leu235Ter	p.L235*	ENST00000457016	7/16	1084/11025	704/8532	235/2843	L/*	tTa/tAa
DC_A	TCGA.AA.3860.01	colorectal	APC	GRCh37	5	112175303	112175303	Nonsense_Mutation	SNP	C	C	T	c.4012C>T	p.Gln1338Ter	p.Q1338*	ENST00000457016	16/16	4392/11025	4012/8532	1338/2843	Q/*	Cag/Tag
DC_A	TCGA.AA.3869.01	colorectal	APC	GRCh37	5	112173987	112173988	Frame_Shift_Del	DEL	CC	CC	-	c.2696_2697delCC	p.Thr899IlefsTer12	p.T899Ifs*12	ENST00000457016	16/16	3076-3077/11025	2696-2697/8532	899/2843	T/X	aCC/a
DC_A	TCGA.AA.3872.01	colorectal	APC	GRCh37	5	112175605	112175605	Frame_Shift_Del	DEL	A	A	-	c.4314delA	p.Pro1439LeufsTer34	p.P1439Lfs*34	ENST00000457016	16/16	4694/11025	4314/8532	1438/2843	T/X	acA/ac
DC_A	TCGA.AA.3930.01	colorectal	APC	GRCh37	5	112174180	112174180	Frame_Shift_Del	DEL	T	T	-	c.2891delT	p.Leu964Ter	p.L964*	ENST00000457016	16/16	3269/11025	2889/8532	963/2843	S/X	agT/ag
DC_A	TCGA.AA.3941.01	colorectal	APC	GRCh37	5	112175761	112175761	Frame_Shift_Del	DEL	T	T	-	c.4473delT	p.Phe1491LeufsTer16	p.F1491Lfs*16	ENST00000457016	16/16	4850/11025	4470/8532	1490/2843	H/X	caT/ca
DC_A	TCGA.AA.3947.01	colorectal	RNF43	GRCh37	17	56435815	56435816	Frame_Shift_Ins	INS	-	-	T	c.1321_1322insA	p.Pro441HisfsTer2	p.P441Hfs*2	ENST00000584437	8/9	3277-3278/5575	1321-1322/2352	441/783	P/HX	cct/cAct
DC_A	TCGA.AA.3952.01	colorectal	APC	GRCh37	5	112116592	112116592	Nonsense_Mutation	SNP	C	C	T	c.637C>T	p.Arg213Ter	p.R213*	ENST00000457016	6/16	1017/11025	637/8532	213/2843	R/*	Cga/Tga
DC_A	TCGA.AA.3955.01	colorectal	APC	GRCh37	5	112175438	112175439	Frame_Shift_Ins	INS	-	-	T	c.4148dupT	p.Met1383IlefsTer3	p.M1383Ifs*3	ENST00000457016	16/16	4527-4528/11025	4147-4148/8532	1383/2843	M/IX	atg/aTtg
DC_A	TCGA.AA.3973.01	colorectal	APC	GRCh37	5	112175423	112175423	Nonsense_Mutation	SNP	C	C	T	c.4132C>T	p.Gln1378Ter	p.Q1378*	ENST00000457016	16/16	4512/11025	4132/8532	1378/2843	Q/*	Cag/Tag
DC_A	TCGA.AA.3976.01	colorectal	APC	GRCh37	5	112175530	112175530	Frame_Shift_Del	DEL	G	G	-	c.4240delG	p.Val1414Ter	p.V1414*	ENST00000457016	16/16	4619/11025	4239/8532	1413/2843	M/X	atG/at
DC_A	TCGA.AA.3980.01	colorectal	APC	GRCh37	5	112128191	112128191	Nonsense_Mutation	SNP	C	C	T	c.694C>T	p.Arg232Ter	p.R232*	ENST00000457016	7/16	1074/11025	694/8532	232/2843	R/*	Cga/Tga
DC_A	TCGA.AA.3989.01	colorectal	APC	GRCh37	5	112128143	112128143	Nonsense_Mutation	SNP	C	C	T	c.646C>T	p.Arg216Ter	p.R216*	ENST00000457016	7/16	1026/11025	646/8532	216/2843	R/*	Cga/Tga
DC_A	TCGA.AA.3994.01	colorectal	APC	GRCh37	5	112173704	112173704	Nonsense_Mutation	SNP	C	C	T	c.2413C>T	p.Arg805Ter	p.R805*	ENST00000457016	16/16	2793/11025	2413/8532	805/2843	R/*	Cga/Tga
DC_A	TCGA.AA.3994.01	colorectal	APC	GRCh37	5	112175752	112175752	Frame_Shift_Del	DEL	T	T	-	c.4463delT	p.Leu1488TyrfsTer19	p.L1488Yfs*19	ENST00000457016	16/16	4841/11025	4461/8532	1487/2843	T/X	acT/ac
DC_A	TCGA.AA.A00A.01	colorectal	APC	GRCh37	5	112151228	112151229	Frame_Shift_Ins	INS	-	-	T	c.875dupT	p.Leu292PhefsTer4	p.L292Ffs*4	ENST00000457016	9/16	1251-1252/11025	871-872/8532	291/2843	V/VX	gtt/gTtt
DC_A	TCGA.AA.A00A.01	colorectal	APC	GRCh37	5	112175969	112175970	Frame_Shift_Ins	INS	-	-	A	c.4682dupA	p.Asp1562GlyfsTer5	p.D1562Gfs*5	ENST00000457016	16/16	5058-5059/11025	4678-4679/8532	1560/2843	E/EX	gaa/gAaa
DC_A	TCGA.AA.A00D.01	colorectal	APC	GRCh37	5	112164616	112164616	Nonsense_Mutation	SNP	C	C	T	c.1690C>T	p.Arg564Ter	p.R564*	ENST00000457016	14/16	2070/11025	1690/8532	564/2843	R/*	Cga/Tga
DC_A	TCGA.AA.A00K.01	colorectal	APC	GRCh37	5	112175390	112175390	Nonsense_Mutation	SNP	C	C	T	c.4099C>T	p.Gln1367Ter	p.Q1367*	ENST00000457016	16/16	4479/11025	4099/8532	1367/2843	Q/*	Cag/Tag
DC_A	TCGA.AA.A00N.01	colorectal	APC	GRCh37	5	112175513	112175513	Nonsense_Mutation	SNP	G	G	T	c.4222G>T	p.Glu1408Ter	p.E1408*	ENST00000457016	16/16	4602/11025	4222/8532	1408/2843	E/*	Gaa/Taa
DC_A	TCGA.AA.A00N.01	colorectal	APC	GRCh37	5	112175133	112175133	Nonsense_Mutation	SNP	C	C	A	c.3842C>A	p.Ser1281Ter	p.S1281*	ENST00000457016	16/16	4222/11025	3842/8532	1281/2843	S/*	tCa/tAa
DC_A	TCGA.AA.A00O.01	colorectal	APC	GRCh37	5	112175390	112175390	Nonsense_Mutation	SNP	C	C	T	c.4099C>T	p.Gln1367Ter	p.Q1367*	ENST00000457016	16/16	4479/11025	4099/8532	1367/2843	Q/*	Cag/Tag
DC_A	TCGA.AA.A00R.01	colorectal	APC	GRCh37	5	112173917	112173917	Nonsense_Mutation	SNP	C	C	T	c.2626C>T	p.Arg876Ter	p.R876*	ENST00000457016	16/16	3006/11025	2626/8532	876/2843	R/*	Cga/Tga
DC_A	TCGA.AA.A010.01	colorectal	APC	GRCh37	5	112175639	112175639	Nonsense_Mutation	SNP	C	C	T	c.4348C>T	p.Arg1450Ter	p.R1450*	ENST00000457016	16/16	4728/11025	4348/8532	1450/2843	R/*	Cga/Tga
DC_A	TCGA.AA.A017.01	colorectal	APC	GRCh37	5	112175021	112175021	Nonsense_Mutation	SNP	C	C	T	c.3730C>T	p.Gln1244Ter	p.Q1244*	ENST00000457016	16/16	4110/11025	3730/8532	1244/2843	Q/*	Caa/Taa
DC_A	TCGA.AA.A01I.01	colorectal	APC	GRCh37	5	112174096	112174096	Nonsense_Mutation	SNP	C	C	A	c.2805C>A	p.Tyr935Ter	p.Y935*	ENST00000457016	16/16	3185/11025	2805/8532	935/2843	Y/*	taC/taA
DC_A	TCGA.AA.A01K.01	colorectal	APC	GRCh37	5	112175576	112175576	Nonsense_Mutation	SNP	C	C	T	c.4285C>T	p.Gln1429Ter	p.Q1429*	ENST00000457016	16/16	4665/11025	4285/8532	1429/2843	Q/*	Caa/Taa
DC_A	TCGA.AA.A01K.01	colorectal	APC	GRCh37	5	112173917	112173917	Nonsense_Mutation	SNP	C	C	T	c.2626C>T	p.Arg876Ter	p.R876*	ENST00000457016	16/16	3006/11025	2626/8532	876/2843	R/*	Cga/Tga
DC_A	TCGA.AA.A01S.01	colorectal	APC	GRCh37	5	112164616	112164616	Nonsense_Mutation	SNP	C	C	T	c.1690C>T	p.Arg564Ter	p.R564*	ENST00000457016	14/16	2070/11025	1690/8532	564/2843	R/*	Cga/Tga
DC_A	TCGA.AA.A01Z.01	colorectal	APC	GRCh37	5	112175649	112175650	Frame_Shift_Ins	INS	-	-	TT	c.4359_4360insTT	p.Lys1454LeufsTer20	p.K1454Lfs*20	ENST00000457016	16/16	4738-4739/11025	4358-4359/8532	1453/2843	P/PX	cct/ccTTt
DC_A	TCGA.AA.A024.01	colorectal	APC	GRCh37	5	112154942	112154942	Nonsense_Mutation	SNP	C	C	T	c.1213C>T	p.Arg405Ter	p.R405*	ENST00000457016	10/16	1593/11025	1213/8532	405/2843	R/*	Cga/Tga
DC_A	TCGA.AA.A029.01	colorectal	APC	GRCh37	5	112174094	112174095	Nonsense_Mutation	INS	-	-	A	c.2804dupA	p.Tyr935Ter	p.Y935*	ENST00000457016	16/16	3183-3184/11025	2803-2804/8532	935/2843	Y/*	tac/tAac
DC_A	TCGA.AA.A02F.01	colorectal	APC	GRCh37	5	112175226	112175227	Frame_Shift_Ins	INS	-	-	A	c.3937dupA	p.Thr1313AsnfsTer2	p.T1313Nfs*2	ENST00000457016	16/16	4315-4316/11025	3935-3936/8532	1312/2843	G/GX	gga/ggAa
DC_A	TCGA.AA.A02F.01	colorectal	APC	GRCh37	5	112162829	112162830	Frame_Shift_Ins	INS	-	-	A	c.1434dupA	p.Leu479IlefsTer6	p.L479Ifs*6	ENST00000457016	12/16	1813-1814/11025	1433-1434/8532	478/2843	L/LX	tta/ttAa
DC_A	TCGA.AA.A02H.01	colorectal	APC	GRCh37	5	112151276	112151276	Frame_Shift_Del	DEL	C	C	-	c.919delC	p.His307IlefsTer29	p.H307Ifs*29	ENST00000457016	9/16	1299/11025	919/8532	307/2843	H/X	Cat/at
DC_A	TCGA.AA.A02J.01	colorectal	APC	GRCh37	5	112116592	112116592	Nonsense_Mutation	SNP	C	C	T	c.637C>T	p.Arg213Ter	p.R213*	ENST00000457016	6/16	1017/11025	637/8532	213/2843	R/*	Cga/Tga
DC_A	TCGA.AA.A02J.01	colorectal	APC	GRCh37	5	112175429	112175430	Frame_Shift_Ins	INS	-	-	C	c.4142dupC	p.Leu1382ThrfsTer4	p.L1382Tfs*4	ENST00000457016	16/16	4518-4519/11025	4138-4139/8532	1380/2843	T/TX	acc/aCcc
DC_A	TCGA.AA.A02O.01	colorectal	APC	GRCh37	5	112175193	112175193	Frame_Shift_Del	DEL	C	C	-	c.3904delC	p.Leu1302CysfsTer3	p.L1302Cfs*3	ENST00000457016	16/16	4282/11025	3902/8532	1301/2843	T/X	aCc/ac
DC_A	TCGA.AA.A02W.01	colorectal	APC	GRCh37	5	112173917	112173917	Nonsense_Mutation	SNP	C	C	T	c.2626C>T	p.Arg876Ter	p.R876*	ENST00000457016	16/16	3006/11025	2626/8532	876/2843	R/*	Cga/Tga
DC_A	TCGA.AA.A02W.01	colorectal	APC	GRCh37	5	112175411	112175411	Nonsense_Mutation	SNP	G	G	T	c.4120G>T	p.Glu1374Ter	p.E1374*	ENST00000457016	16/16	4500/11025	4120/8532	1374/2843	E/*	Gaa/Taa
DC_A	TCGA.AD.5900.01	colorectal	RNF43	GRCh37	17	56435161	56435161	Frame_Shift_Del	DEL	C	C	-	c.1976delG	p.Gly659ValfsTer41	p.G659Vfs*41	ENST00000584437	8/9	3932/5575	1976/2352	659/783	G/X	gGt/gt
DC_A	TCGA.AD.6548.01	colorectal	APC	GRCh37	5	112175162	112175162	Nonsense_Mutation	SNP	C	C	T	c.3871C>T	p.Gln1291Ter	p.Q1291*	ENST00000457016	16/16	4251/11025	3871/8532	1291/2843	Q/*	Cag/Tag
DC_A	TCGA.AD.6888.01	colorectal	APC	GRCh37	5	112128143	112128143	Nonsense_Mutation	SNP	C	C	T	c.646C>T	p.Arg216Ter	p.R216*	ENST00000457016	7/16	1026/11025	646/8532	216/2843	R/*	Cga/Tga
DC_A	TCGA.AD.6889.01	colorectal	RNF43	GRCh37	17	56435161	56435161	Frame_Shift_Del	DEL	C	C	-	c.1976delG	p.Gly659ValfsTer41	p.G659Vfs*41	ENST00000584437	8/9	3932/5575	1976/2352	659/783	G/X	gGt/gt
DC_A	TCGA.AD.6889.01	colorectal	RNF43	GRCh37	17	56448297	56448297	Frame_Shift_Del	DEL	C	C	-	c.350delG	p.Arg117ProfsTer41	p.R117Pfs*41	ENST00000584437	2/9	2306/5575	350/2352	117/783	R/X	cGc/cc
DC_A	TCGA.AD.6890.01	colorectal	APC	GRCh37	5	112175639	112175639	Nonsense_Mutation	SNP	C	C	T	c.4348C>T	p.Arg1450Ter	p.R1450*	ENST00000457016	16/16	4728/11025	4348/8532	1450/2843	R/*	Cga/Tga
DC_A	TCGA.AD.6890.01	colorectal	APC	GRCh37	5	112174096	112174096	Nonsense_Mutation	SNP	C	C	A	c.2805C>A	p.Tyr935Ter	p.Y935*	ENST00000457016	16/16	3185/11025	2805/8532	935/2843	Y/*	taC/taA
DC_A	TCGA.AD.6895.01	colorectal	RNF43	GRCh37	17	56448298	56448298	Frame_Shift_Del	DEL	G	G	-	c.349delC	p.Arg117AlafsTer41	p.R117Afs*41	ENST00000584437	2/9	2305/5575	349/2352	117/783	R/X	Cgc/gc
DC_A	TCGA.AD.6895.01	colorectal	RNF43	GRCh37	17	56435161	56435161	Frame_Shift_Del	DEL	C	C	-	c.1976delG	p.Gly659ValfsTer41	p.G659Vfs*41	ENST00000584437	8/9	3932/5575	1976/2352	659/783	G/X	gGt/gt
DC_A	TCGA.AD.6901.01	colorectal	APC	GRCh37	5	112175480	112175480	Nonsense_Mutation	SNP	G	G	T	c.4189G>T	p.Glu1397Ter	p.E1397*	ENST00000457016	16/16	4569/11025	4189/8532	1397/2843	E/*	Gag/Tag
DC_A	TCGA.AD.6964.01	colorectal	RNF43	GRCh37	17	56435161	56435161	Frame_Shift_Del	DEL	C	C	-	c.1976delG	p.Gly659ValfsTer41	p.G659Vfs*41	ENST00000584437	8/9	3932/5575	1976/2352	659/783	G/X	gGt/gt
DC_A	TCGA.AD.6965.01	colorectal	APC	GRCh37	5	112175513	112175513	Nonsense_Mutation	SNP	G	G	T	c.4222G>T	p.Glu1408Ter	p.E1408*	ENST00000457016	16/16	4602/11025	4222/8532	1408/2843	E/*	Gaa/Taa
DC_A	TCGA.AF.2687.01	colorectal	APC	GRCh37	5	112175212	112175216	Frame_Shift_Del	DEL	AAAAG	AAAAG	-	c.3927_3931delAAAGA	p.Glu1309AspfsTer4	p.E1309Dfs*4	ENST00000457016	16/16	4301-4305/11025	3921-3925/8532	1307-1309/2843	IKE/IX	atAAAAGaa/ataa
DC_A	TCGA.AF.2690.01	colorectal	APC	GRCh37	5	112116592	112116592	Nonsense_Mutation	SNP	C	C	T	c.637C>T	p.Arg213Ter	p.R213*	ENST00000457016	6/16	1017/11025	637/8532	213/2843	R/*	Cga/Tga
DC_A	TCGA.AF.2690.01	colorectal	APC	GRCh37	5	112175536	112175536	Frame_Shift_Del	DEL	T	T	-	c.4245delT	p.Ser1415ArgfsTer4	p.S1415Rfs*4	ENST00000457016	16/16	4625/11025	4245/8532	1415/2843	S/X	agT/ag
DC_A	TCGA.AF.2691.01	colorectal	APC	GRCh37	5	112175328	112175328	Nonsense_Mutation	SNP	C	C	G	c.4037C>G	p.Ser1346Ter	p.S1346*	ENST00000457016	16/16	4417/11025	4037/8532	1346/2843	S/*	tCa/tGa
DC_A	TCGA.AF.2692.01	colorectal	APC	GRCh37	5	112173429	112173429	Nonsense_Mutation	SNP	C	C	G	c.2138C>G	p.Ser713Ter	p.S713*	ENST00000457016	16/16	2518/11025	2138/8532	713/2843	S/*	tCa/tGa
DC_A	TCGA.AF.3400.01	colorectal	APC	GRCh37	5	112175171	112175171	Nonsense_Mutation	SNP	C	C	T	c.3880C>T	p.Gln1294Ter	p.Q1294*	ENST00000457016	16/16	4260/11025	3880/8532	1294/2843	Q/*	Cag/Tag
DC_A	TCGA.AF.3913.01	colorectal	APC	GRCh37	5	112175246	112175246	Frame_Shift_Del	DEL	C	C	-	c.3956delC	p.Pro1319LeufsTer2	p.P1319Lfs*2	ENST00000457016	16/16	4335/11025	3955/8532	1319/2843	P/X	Cct/ct
DC_A	TCGA.AF.4110.01	colorectal	APC	GRCh37	5	112175271	112175271	Nonsense_Mutation	SNP	C	C	A	c.3980C>A	p.Ser1327Ter	p.S1327*	ENST00000457016	16/16	4360/11025	3980/8532	1327/2843	S/*	tCa/tAa
DC_A	TCGA.AF.4110.01	colorectal	APC	GRCh37	5	112163701	112163701	Nonsense_Mutation	SNP	C	C	T	c.1624C>T	p.Gln542Ter	p.Q542*	ENST00000457016	13/16	2004/11025	1624/8532	542/2843	Q/*	Cag/Tag
DC_A	TCGA.AF.6655.01	colorectal	APC	GRCh37	5	112175626	112175626	Frame_Shift_Del	DEL	A	A	-	c.4335delA	p.Ala1446LeufsTer27	p.A1446Lfs*27	ENST00000457016	16/16	4715/11025	4335/8532	1445/2843	T/X	acA/ac
DC_A	TCGA.AG.3581.01	colorectal	APC	GRCh37	5	112164616	112164616	Nonsense_Mutation	SNP	C	C	T	c.1690C>T	p.Arg564Ter	p.R564*	ENST00000457016	14/16	2070/11025	1690/8532	564/2843	R/*	Cga/Tga
DC_A	TCGA.AG.3591.01	colorectal	APC	GRCh37	5	112175951	112175952	Frame_Shift_Ins	INS	-	-	A	c.4666dupA	p.Thr1556AsnfsTer3	p.T1556Nfs*3	ENST00000457016	16/16	5040-5041/11025	4660-4661/8532	1554/2843	E/EX	gaa/gAaa
DC_A	TCGA.AG.3592.01	colorectal	APC	GRCh37	5	112175277	112175278	Frame_Shift_Ins	INS	-	-	C	c.3989dupC	p.Arg1331Ter	p.R1331*	ENST00000457016	16/16	4366-4367/11025	3986-3987/8532	1329/2843	H/HX	cac/caCc
DC_A	TCGA.AG.3592.01	colorectal	APC	GRCh37	5	112162833	112162834	Frame_Shift_Ins	INS	-	-	C	c.1438dupC	p.Gln480ProfsTer5	p.Q480Pfs*5	ENST00000457016	12/16	1817-1818/11025	1437-1438/8532	479-480/2843	-/X	-/C
DC_A	TCGA.AG.3593.01	colorectal	APC	GRCh37	5	112175348	112175348	Nonsense_Mutation	SNP	G	G	T	c.4057G>T	p.Glu1353Ter	p.E1353*	ENST00000457016	16/16	4437/11025	4057/8532	1353/2843	E/*	Gaa/Taa
DC_A	TCGA.AG.3594.01	colorectal	APC	GRCh37	5	112175001	112175002	Frame_Shift_Del	DEL	AG	AG	-	c.3712_3713delAG	p.Ser1238Ter	p.S1238*	ENST00000457016	16/16	4090-4091/11025	3710-3711/8532	1237/2843	Q/X	cAG/c
DC_A	TCGA.AG.3599.01	colorectal	APC	GRCh37	5	112163652	112163652	Nonsense_Mutation	SNP	C	C	A	c.1575C>A	p.Cys525Ter	p.C525*	ENST00000457016	13/16	1955/11025	1575/8532	525/2843	C/*	tgC/tgA
DC_A	TCGA.AG.3601.01	colorectal	APC	GRCh37	5	112175235	112175235	Nonsense_Mutation	SNP	C	C	A	c.3944C>A	p.Ser1315Ter	p.S1315*	ENST00000457016	16/16	4324/11025	3944/8532	1315/2843	S/*	tCa/tAa
DC_A	TCGA.AG.3602.01	colorectal	APC	GRCh37	5	112175328	112175328	Nonsense_Mutation	SNP	C	C	G	c.4037C>G	p.Ser1346Ter	p.S1346*	ENST00000457016	16/16	4417/11025	4037/8532	1346/2843	S/*	tCa/tGa
DC_A	TCGA.AG.3725.01	colorectal	APC	GRCh37	5	112175348	112175348	Nonsense_Mutation	SNP	G	G	T	c.4057G>T	p.Glu1353Ter	p.E1353*	ENST00000457016	16/16	4437/11025	4057/8532	1353/2843	E/*	Gaa/Taa
DC_A	TCGA.AG.3725.01	colorectal	APC	GRCh37	5	112175207	112175207	Nonsense_Mutation	SNP	G	G	T	c.3916G>T	p.Glu1306Ter	p.E1306*	ENST00000457016	16/16	4296/11025	3916/8532	1306/2843	E/*	Gaa/Taa
DC_A	TCGA.AG.3726.01	colorectal	APC	GRCh37	5	112173290	112173290	Nonsense_Mutation	SNP	C	C	T	c.1999C>T	p.Gln667Ter	p.Q667*	ENST00000457016	16/16	2379/11025	1999/8532	667/2843	Q/*	Caa/Taa
DC_A	TCGA.AG.3726.01	colorectal	APC	GRCh37	5	112175136	112175136	Nonsense_Mutation	SNP	C	C	G	c.3845C>G	p.Ser1282Ter	p.S1282*	ENST00000457016	16/16	4225/11025	3845/8532	1282/2843	S/*	tCa/tGa
DC_A	TCGA.AG.3731.01	colorectal	APC	GRCh37	5	112128143	112128143	Nonsense_Mutation	SNP	C	C	T	c.646C>T	p.Arg216Ter	p.R216*	ENST00000457016	7/16	1026/11025	646/8532	216/2843	R/*	Cga/Tga
DC_A	TCGA.AG.3742.01	colorectal	APC	GRCh37	5	112162891	112162891	Nonsense_Mutation	SNP	C	C	T	c.1495C>T	p.Arg499Ter	p.R499*	ENST00000457016	12/16	1875/11025	1495/8532	499/2843	R/*	Cga/Tga
DC_A	TCGA.AG.3742.01	colorectal	APC	GRCh37	5	112175198	112175198	Nonsense_Mutation	SNP	C	C	T	c.3907C>T	p.Gln1303Ter	p.Q1303*	ENST00000457016	16/16	4287/11025	3907/8532	1303/2843	Q/*	Caa/Taa
DC_A	TCGA.AG.3881.01	colorectal	APC	GRCh37	5	112175390	112175390	Nonsense_Mutation	SNP	C	C	T	c.4099C>T	p.Gln1367Ter	p.Q1367*	ENST00000457016	16/16	4479/11025	4099/8532	1367/2843	Q/*	Cag/Tag
DC_A	TCGA.AG.3882.01	colorectal	APC	GRCh37	5	112164663	112164664	Frame_Shift_Ins	INS	-	-	A	c.1742dupA	p.Glu582GlyfsTer20	p.E582Gfs*20	ENST00000457016	14/16	2117-2118/11025	1737-1738/8532	579-580/2843	-/X	-/A
DC_A	TCGA.AG.3887.01	colorectal	APC	GRCh37	5	112175217	112175218	Frame_Shift_Del	DEL	AA	AA	-	c.3928_3929delAA	p.Lys1310AspfsTer4	p.K1310Dfs*4	ENST00000457016	16/16	4306-4307/11025	3926-3927/8532	1309/2843	E/X	gAA/g
DC_A	TCGA.AG.3887.01	colorectal	APC	GRCh37	5	112175069	112175069	Nonsense_Mutation	SNP	C	C	T	c.3778C>T	p.Gln1260Ter	p.Q1260*	ENST00000457016	16/16	4158/11025	3778/8532	1260/2843	Q/*	Cag/Tag
DC_A	TCGA.AG.3890.01	colorectal	APC	GRCh37	5	112174093	112174093	Frame_Shift_Del	DEL	T	T	-	c.2803delT	p.Tyr935ThrfsTer20	p.Y935Tfs*20	ENST00000457016	16/16	3182/11025	2802/8532	934/2843	T/X	acT/ac
DC_A	TCGA.AG.3892.01	colorectal	APC	GRCh37	5	112174631	112174631	Nonsense_Mutation	SNP	C	C	T	c.3340C>T	p.Arg1114Ter	p.R1114*	ENST00000457016	16/16	3720/11025	3340/8532	1114/2843	R/*	Cga/Tga
DC_A	TCGA.AG.3893.01	colorectal	APC	GRCh37	5	112175358	112175358	Nonsense_Mutation	SNP	C	C	G	c.4067C>G	p.Ser1356Ter	p.S1356*	ENST00000457016	16/16	4447/11025	4067/8532	1356/2843	S/*	tCa/tGa
DC_A	TCGA.AG.3894.01	colorectal	APC	GRCh37	5	112128143	112128143	Nonsense_Mutation	SNP	C	C	T	c.646C>T	p.Arg216Ter	p.R216*	ENST00000457016	7/16	1026/11025	646/8532	216/2843	R/*	Cga/Tga
DC_A	TCGA.AG.3896.01	colorectal	APC	GRCh37	5	112173917	112173917	Nonsense_Mutation	SNP	C	C	T	c.2626C>T	p.Arg876Ter	p.R876*	ENST00000457016	16/16	3006/11025	2626/8532	876/2843	R/*	Cga/Tga
DC_A	TCGA.AG.3898.01	colorectal	APC	GRCh37	5	112173704	112173704	Nonsense_Mutation	SNP	C	C	T	c.2413C>T	p.Arg805Ter	p.R805*	ENST00000457016	16/16	2793/11025	2413/8532	805/2843	R/*	Cga/Tga
DC_A	TCGA.AG.3901.01	colorectal	APC	GRCh37	5	112175530	112175530	Frame_Shift_Del	DEL	G	G	-	c.4240delG	p.Val1414Ter	p.V1414*	ENST00000457016	16/16	4619/11025	4239/8532	1413/2843	M/X	atG/at
DC_A	TCGA.AG.3902.01	colorectal	APC	GRCh37	5	112175153	112175153	Nonsense_Mutation	SNP	G	G	T	c.3862G>T	p.Gly1288Ter	p.G1288*	ENST00000457016	16/16	4242/11025	3862/8532	1288/2843	G/*	Gga/Tga
DC_A	TCGA.AG.3909.01	colorectal	APC	GRCh37	5	112173780	112173780	Frame_Shift_Del	DEL	T	T	-	c.2489delT	p.Val830GlyfsTer12	p.V830Gfs*12	ENST00000457016	16/16	2869/11025	2489/8532	830/2843	V/X	gTg/gg
DC_A	TCGA.AG.3909.01	colorectal	APC	GRCh37	5	112175168	112175169	Frame_Shift_Del	DEL	AC	AC	-	c.3880_3881delCA	p.Gln1294GlyfsTer6	p.Q1294Gfs*6	ENST00000457016	16/16	4257-4258/11025	3877-3878/8532	1293/2843	T/X	ACa/a
DC_A	TCGA.AG.3999.01	colorectal	APC	GRCh37	5	112116523	112116523	Nonsense_Mutation	SNP	G	G	T	c.568G>T	p.Glu190Ter	p.E190*	ENST00000457016	6/16	948/11025	568/8532	190/2843	E/*	Gaa/Taa
DC_A	TCGA.AG.4001.01	colorectal	APC	GRCh37	5	112173917	112173917	Nonsense_Mutation	SNP	C	C	T	c.2626C>T	p.Arg876Ter	p.R876*	ENST00000457016	16/16	3006/11025	2626/8532	876/2843	R/*	Cga/Tga
DC_A	TCGA.AG.4005.01	colorectal	APC	GRCh37	5	112174884	112174884	Nonsense_Mutation	SNP	C	C	G	c.3593C>G	p.Ser1198Ter	p.S1198*	ENST00000457016	16/16	3973/11025	3593/8532	1198/2843	S/*	tCa/tGa
DC_A	TCGA.AG.4005.01	colorectal	APC	GRCh37	5	112175273	112175273	Nonsense_Mutation	SNP	C	C	T	c.3982C>T	p.Gln1328Ter	p.Q1328*	ENST00000457016	16/16	4362/11025	3982/8532	1328/2843	Q/*	Cag/Tag
DC_A	TCGA.AG.4007.01	colorectal	APC	GRCh37	5	112175198	112175198	Nonsense_Mutation	SNP	C	C	T	c.3907C>T	p.Gln1303Ter	p.Q1303*	ENST00000457016	16/16	4287/11025	3907/8532	1303/2843	Q/*	Caa/Taa
DC_A	TCGA.AG.4007.01	colorectal	APC	GRCh37	5	112175426	112175426	Nonsense_Mutation	SNP	G	G	T	c.4135G>T	p.Glu1379Ter	p.E1379*	ENST00000457016	16/16	4515/11025	4135/8532	1379/2843	E/*	Gag/Tag
DC_A	TCGA.AG.4015.01	colorectal	APC	GRCh37	5	112175419	112175419	Nonsense_Mutation	SNP	T	T	A	c.4128T>A	p.Tyr1376Ter	p.Y1376*	ENST00000457016	16/16	4508/11025	4128/8532	1376/2843	Y/*	taT/taA
DC_A	TCGA.AG.4021.01	colorectal	APC	GRCh37	5	112175212	112175216	Frame_Shift_Del	DEL	AAAAG	AAAAG	-	c.3927_3931delAAAGA	p.Glu1309AspfsTer4	p.E1309Dfs*4	ENST00000457016	16/16	4301-4305/11025	3921-3925/8532	1307-1309/2843	IKE/IX	atAAAAGaa/ataa
DC_A	TCGA.AG.4022.01	colorectal	APC	GRCh37	5	112175423	112175423	Nonsense_Mutation	SNP	C	C	T	c.4132C>T	p.Gln1378Ter	p.Q1378*	ENST00000457016	16/16	4512/11025	4132/8532	1378/2843	Q/*	Cag/Tag
DC_A	TCGA.AG.4022.01	colorectal	APC	GRCh37	5	112170669	112170669	Frame_Shift_Del	DEL	T	T	-	c.1766delT	p.Leu589Ter	p.L589*	ENST00000457016	15/16	2145/11025	1765/8532	589/2843	L/X	Ttg/tg
DC_A	TCGA.AG.A00C.01	colorectal	APC	GRCh37	5	112175480	112175480	Nonsense_Mutation	SNP	G	G	T	c.4189G>T	p.Glu1397Ter	p.E1397*	ENST00000457016	16/16	4569/11025	4189/8532	1397/2843	E/*	Gag/Tag
DC_A	TCGA.AG.A014.01	colorectal	APC	GRCh37	5	112174916	112174916	Nonsense_Mutation	SNP	G	G	T	c.3625G>T	p.Glu1209Ter	p.E1209*	ENST00000457016	16/16	4005/11025	3625/8532	1209/2843	E/*	Gaa/Taa
DC_A	TCGA.AG.A01L.01	colorectal	APC	GRCh37	5	112173797	112173798	Frame_Shift_Ins	INS	-	-	C	c.2507dupC	p.Ser837IlefsTer7	p.S837Ifs*7	ENST00000457016	16/16	2886-2887/11025	2506-2507/8532	836/2843	S/SX	tca/tCca
DC_A	TCGA.AG.A01Y.01	colorectal	APC	GRCh37	5	112175171	112175171	Nonsense_Mutation	SNP	C	C	T	c.3880C>T	p.Gln1294Ter	p.Q1294*	ENST00000457016	16/16	4260/11025	3880/8532	1294/2843	Q/*	Cag/Tag
DC_A	TCGA.AG.A020.01	colorectal	APC	GRCh37	5	112175021	112175022	Frame_Shift_Ins	INS	-	-	A	c.3734dupA	p.Ala1246GlyfsTer10	p.A1246Gfs*10	ENST00000457016	16/16	4110-4111/11025	3730-3731/8532	1244/2843	Q/QX	caa/cAaa
DC_A	TCGA.AG.A020.01	colorectal	CTNNB1	GRCh37	3	41274897	41274897	Missense_Mutation	SNP	T	T	G	c.1147T>G	p.Trp383Gly	p.W383G	ENST00000349496	8/15	1427/3729	1147/2346	383/781	W/G	Tgg/Ggg
DC_A	TCGA.AG.A025.01	colorectal	APC	GRCh37	5	112175424	112175424	Frame_Shift_Del	DEL	A	A	-	c.4133delA	p.Gln1378ArgfsTer37	p.Q1378Rfs*37	ENST00000457016	16/16	4513/11025	4133/8532	1378/2843	Q/X	cAg/cg
DC_A	TCGA.AG.A026.01	colorectal	APC	GRCh37	5	112175101	112175101	Nonsense_Mutation	SNP	T	T	A	c.3810T>A	p.Cys1270Ter	p.C1270*	ENST00000457016	16/16	4190/11025	3810/8532	1270/2843	C/*	tgT/tgA
DC_A	TCGA.AG.A02G.01	colorectal	APC	GRCh37	5	112116592	112116592	Nonsense_Mutation	SNP	C	C	T	c.637C>T	p.Arg213Ter	p.R213*	ENST00000457016	6/16	1017/11025	637/8532	213/2843	R/*	Cga/Tga
DC_A	TCGA.AG.A02X.01	colorectal	APC	GRCh37	5	112175216	112175216	Nonsense_Mutation	SNP	G	G	T	c.3925G>T	p.Glu1309Ter	p.E1309*	ENST00000457016	16/16	4305/11025	3925/8532	1309/2843	E/*	Gaa/Taa
DC_A	TCGA.AG.A032.01	colorectal	APC	GRCh37	5	112151261	112151261	Nonsense_Mutation	SNP	C	C	T	c.904C>T	p.Arg302Ter	p.R302*	ENST00000457016	9/16	1284/11025	904/8532	302/2843	R/*	Cga/Tga
DC_A	TCGA.AG.A032.01	colorectal	APC	GRCh37	5	112175255	112175255	Nonsense_Mutation	SNP	G	G	T	c.3964G>T	p.Glu1322Ter	p.E1322*	ENST00000457016	16/16	4344/11025	3964/8532	1322/2843	E/*	Gaa/Taa
DC_A	TCGA.AH.6544.01	colorectal	APC	GRCh37	5	112175639	112175639	Nonsense_Mutation	SNP	C	C	T	c.4348C>T	p.Arg1450Ter	p.R1450*	ENST00000457016	16/16	4728/11025	4348/8532	1450/2843	R/*	Cga/Tga
DC_A	TCGA.AH.6544.01	colorectal	APC	GRCh37	5	112174631	112174631	Nonsense_Mutation	SNP	C	C	T	c.3340C>T	p.Arg1114Ter	p.R1114*	ENST00000457016	16/16	3720/11025	3340/8532	1114/2843	R/*	Cga/Tga
DC_A	TCGA.AH.6643.01	colorectal	APC	GRCh37	5	112175507	112175507	Nonsense_Mutation	SNP	C	C	T	c.4216C>T	p.Gln1406Ter	p.Q1406*	ENST00000457016	16/16	4596/11025	4216/8532	1406/2843	Q/*	Cag/Tag
DC_A	TCGA.AH.6644.01	colorectal	APC	GRCh37	5	112175639	112175639	Nonsense_Mutation	SNP	C	C	T	c.4348C>T	p.Arg1450Ter	p.R1450*	ENST00000457016	16/16	4728/11025	4348/8532	1450/2843	R/*	Cga/Tga
DC_A	TCGA.AH.6897.01	colorectal	APC	GRCh37	5	112155011	112155011	Nonsense_Mutation	SNP	G	G	T	c.1282G>T	p.Glu428Ter	p.E428*	ENST00000457016	10/16	1662/11025	1282/8532	428/2843	E/*	Gaa/Taa
DC_A	TCGA.AH.6897.01	colorectal	APC	GRCh37	5	112174835	112174835	Nonsense_Mutation	SNP	A	A	T	c.3544A>T	p.Lys1182Ter	p.K1182*	ENST00000457016	16/16	3924/11025	3544/8532	1182/2843	K/*	Aaa/Taa
DC_A	TCGA.AH.6903.01	colorectal	APC	GRCh37	5	112174310	112174310	Frame_Shift_Del	DEL	A	A	-	c.3022delA	p.Ile1008TyrfsTer14	p.I1008Yfs*14	ENST00000457016	16/16	3399/11025	3019/8532	1007/2843	K/X	Aaa/aa
DC_A	TCGA.AM.5820.01	colorectal	APC	GRCh37	5	112175676	112175677	Frame_Shift_Del	DEL	AG	AG	-	c.4393_4394delAG	p.Ser1465TrpfsTer3	p.S1465Wfs*3	ENST00000457016	16/16	4765-4766/11025	4385-4386/8532	1462/2843	K/X	aAG/a
DC_A	TCGA.AM.5820.01	colorectal	APC	GRCh37	5	112173690	112173690	Frame_Shift_Del	DEL	T	T	-	c.2403delT	p.Phe801LeufsTer19	p.F801Lfs*19	ENST00000457016	16/16	2779/11025	2399/8532	800/2843	V/X	gTt/gt
DC_A	TCGA.AM.5821.01	colorectal	APC	GRCh37	5	112175303	112175303	Nonsense_Mutation	SNP	C	C	T	c.4012C>T	p.Gln1338Ter	p.Q1338*	ENST00000457016	16/16	4392/11025	4012/8532	1338/2843	Q/*	Cag/Tag
DC_A	TCGA.AU.3779.01	colorectal	APC	GRCh37	5	112175322	112175322	Nonsense_Mutation	SNP	C	C	A	c.4031C>A	p.Ser1344Ter	p.S1344*	ENST00000457016	16/16	4411/11025	4031/8532	1344/2843	S/*	tCa/tAa
DC_A	TCGA.AU.3779.01	colorectal	APC	GRCh37	5	112116592	112116592	Nonsense_Mutation	SNP	C	C	T	c.637C>T	p.Arg213Ter	p.R213*	ENST00000457016	6/16	1017/11025	637/8532	213/2843	R/*	Cga/Tga
DC_A	TCGA.AU.6004.01	colorectal	RNF43	GRCh37	17	56435161	56435161	Frame_Shift_Del	DEL	C	C	-	c.1976delG	p.Gly659ValfsTer41	p.G659Vfs*41	ENST00000584437	8/9	3932/5575	1976/2352	659/783	G/X	gGt/gt
DC_A	TCGA.AY.4071.01	colorectal	APC	GRCh37	5	112175594	112175594	Frame_Shift_Del	DEL	A	A	-	c.4303delA	p.Arg1435GlufsTer38	p.R1435Efs*38	ENST00000457016	16/16	4683/11025	4303/8532	1435/2843	R/X	Aga/ga
DC_A	TCGA.AY.5543.01	colorectal	APC	GRCh37	5	112162891	112162891	Nonsense_Mutation	SNP	C	C	T	c.1495C>T	p.Arg499Ter	p.R499*	ENST00000457016	12/16	1875/11025	1495/8532	499/2843	R/*	Cga/Tga
DC_A	TCGA.AY.5543.01	colorectal	APC	GRCh37	5	112175766	112175766	Frame_Shift_Del	DEL	C	C	-	c.4476delC	p.Thr1493ArgfsTer14	p.T1493Rfs*14	ENST00000457016	16/16	4855/11025	4475/8532	1492/2843	A/X	gCc/gc
DC_A	TCGA.AY.6197.01	colorectal	APC	GRCh37	5	112175788	112175789	Frame_Shift_Ins	INS	-	-	T	c.4501dupT	p.Ser1501PhefsTer13	p.S1501Ffs*13	ENST00000457016	16/16	4877-4878/11025	4497-4498/8532	1499-1500/2843	-/X	-/T
DC_A	TCGA.AY.6386.01	colorectal	APC	GRCh37	5	112175951	112175952	Frame_Shift_Ins	INS	-	-	A	c.4666dupA	p.Thr1556AsnfsTer3	p.T1556Nfs*3	ENST00000457016	16/16	5040-5041/11025	4660-4661/8532	1554/2843	E/EX	gaa/gAaa
DC_A	TCGA.AY.6386.01	colorectal	APC	GRCh37	5	112173582	112173582	Nonsense_Mutation	SNP	T	T	G	c.2291T>G	p.Leu764Ter	p.L764*	ENST00000457016	16/16	2671/11025	2291/8532	764/2843	L/*	tTa/tGa
DC_A	TCGA.AZ.4315.01	colorectal	APC	GRCh37	5	112175951	112175952	Frame_Shift_Ins	INS	-	-	A	c.4666dupA	p.Thr1556AsnfsTer3	p.T1556Nfs*3	ENST00000457016	16/16	5040-5041/11025	4660-4661/8532	1554/2843	E/EX	gaa/gAaa
DC_A	TCGA.AZ.4315.01	colorectal	APC	GRCh37	5	112178000	112178000	Nonsense_Mutation	SNP	C	C	T	c.6709C>T	p.Arg2237Ter	p.R2237*	ENST00000457016	16/16	7089/11025	6709/8532	2237/2843	R/*	Cga/Tga
DC_A	TCGA.AZ.4315.01	colorectal	APC	GRCh37	5	112174872	112174872	Nonsense_Mutation	SNP	C	C	A	c.3581C>A	p.Ser1194Ter	p.S1194*	ENST00000457016	16/16	3961/11025	3581/8532	1194/2843	S/*	tCa/tAa
DC_A	TCGA.AZ.4615.01	colorectal	RNF43	GRCh37	17	56435161	56435161	Frame_Shift_Del	DEL	C	C	-	c.1976delG	p.Gly659ValfsTer41	p.G659Vfs*41	ENST00000584437	8/9	3932/5575	1976/2352	659/783	G/X	gGt/gt
DC_A	TCGA.AZ.4616.01	colorectal	APC	GRCh37	5	112175944	112175947	Frame_Shift_Del	DEL	AGAG	AGAG	-	c.4653_4656delAGAG	p.Glu1552GlnfsTer12	p.E1552Qfs*12	ENST00000457016	16/16	5033-5036/11025	4653-4656/8532	1551-1552/2843	KE/X	aaAGAG/aa
DC_A	TCGA.AZ.4682.01	colorectal	APC	GRCh37	5	112175390	112175390	Nonsense_Mutation	SNP	C	C	T	c.4099C>T	p.Gln1367Ter	p.Q1367*	ENST00000457016	16/16	4479/11025	4099/8532	1367/2843	Q/*	Cag/Tag
DC_A	TCGA.AZ.4682.01	colorectal	APC	GRCh37	5	112151261	112151261	Nonsense_Mutation	SNP	C	C	T	c.904C>T	p.Arg302Ter	p.R302*	ENST00000457016	9/16	1284/11025	904/8532	302/2843	R/*	Cga/Tga
DC_A	TCGA.AZ.5407.01	colorectal	CTNNB1	GRCh37	3	41266125	41266125	Missense_Mutation	SNP	C	C	T	c.122C>T	p.Thr41Ile	p.T41I	ENST00000349496	3/15	402/3729	122/2346	41/781	T/I	aCc/aTc
DC_A	TCGA.AZ.6598.01	colorectal	RNF43	GRCh37	17	56435161	56435161	Frame_Shift_Del	DEL	C	C	-	c.1976delG	p.Gly659ValfsTer41	p.G659Vfs*41	ENST00000584437	8/9	3932/5575	1976/2352	659/783	G/X	gGt/gt
DC_A	TCGA.AZ.6599.01	colorectal	APC	GRCh37	5	112175639	112175639	Nonsense_Mutation	SNP	C	C	T	c.4348C>T	p.Arg1450Ter	p.R1450*	ENST00000457016	16/16	4728/11025	4348/8532	1450/2843	R/*	Cga/Tga
DC_A	TCGA.AZ.6600.01	colorectal	APC	GRCh37	5	112175639	112175639	Nonsense_Mutation	SNP	C	C	T	c.4348C>T	p.Arg1450Ter	p.R1450*	ENST00000457016	16/16	4728/11025	4348/8532	1450/2843	R/*	Cga/Tga
DC_A	TCGA.AZ.6600.01	colorectal	APC	GRCh37	5	112174058	112174058	Nonsense_Mutation	SNP	A	A	T	c.2767A>T	p.Arg923Ter	p.R923*	ENST00000457016	16/16	3147/11025	2767/8532	923/2843	R/*	Aga/Tga
DC_A	TCGA.AZ.6601.01	colorectal	APC	GRCh37	5	112128191	112128191	Nonsense_Mutation	SNP	C	C	T	c.694C>T	p.Arg232Ter	p.R232*	ENST00000457016	7/16	1074/11025	694/8532	232/2843	R/*	Cga/Tga
DC_A	TCGA.AZ.6601.01	colorectal	APC	GRCh37	5	112151204	112151204	Nonsense_Mutation	SNP	C	C	T	c.847C>T	p.Arg283Ter	p.R283*	ENST00000457016	9/16	1227/11025	847/8532	283/2843	R/*	Cga/Tga
DC_A	TCGA.AZ.6605.01	colorectal	APC	GRCh37	5	112175198	112175198	Nonsense_Mutation	SNP	C	C	T	c.3907C>T	p.Gln1303Ter	p.Q1303*	ENST00000457016	16/16	4287/11025	3907/8532	1303/2843	Q/*	Caa/Taa
DC_A	TCGA.BM.6198.01	colorectal	RNF43	GRCh37	17	56492792	56492805	Frame_Shift_Del	DEL	TCTGATAATAGCTT	TCTGATAATAGCTT	-	c.134_147delAAGCTATTATCAGA	p.Lys45SerfsTer25	p.K45Sfs*25	ENST00000584437	1/9	2090-2103/5575	134-147/2352	45-49/783	KAIIR/X	aAAGCTATTATCAGA/a
DC_A	TCGA.CA.5796.01	colorectal	RNF43	GRCh37	17	56492891	56492891	Frame_Shift_Del	DEL	C	C	-	c.48delG	p.Leu17Ter	p.L17*	ENST00000584437	1/9	2004/5575	48/2352	16/783	L/X	ctG/ct
DC_A	TCGA.CA.5797.01	colorectal	APC	GRCh37	5	112175350	112175351	Frame_Shift_Ins	INS	-	-	TTTTT	c.4063_4064insTTTTT	p.Ser1355PhefsTer62	p.S1355Ffs*62	ENST00000457016	16/16	4439-4440/11025	4059-4060/8532	1353-1354/2843	-/FX	-/TTTTT
DC_A	TCGA.CA.6717.01	colorectal	APC	GRCh37	5	112175639	112175639	Nonsense_Mutation	SNP	C	C	T	c.4348C>T	p.Arg1450Ter	p.R1450*	ENST00000457016	16/16	4728/11025	4348/8532	1450/2843	R/*	Cga/Tga
DC_A	TCGA.CA.6717.01	colorectal	APC	GRCh37	5	112154771	112154771	Nonsense_Mutation	SNP	C	C	T	c.1042C>T	p.Arg348Ter	p.R348*	ENST00000457016	10/16	1422/11025	1042/8532	348/2843	R/*	Cga/Tga
DC_A	TCGA.CA.6717.01	colorectal	APC	GRCh37	5	112179737	112179737	Nonsense_Mutation	SNP	C	C	T	c.8446C>T	p.Arg2816Ter	p.R2816*	ENST00000457016	16/16	8826/11025	8446/8532	2816/2843	R/*	Cga/Tga
DC_A	TCGA.CA.6717.01	colorectal	APC	GRCh37	5	112177049	112177049	Nonsense_Mutation	SNP	C	C	T	c.5758C>T	p.Arg1920Ter	p.R1920*	ENST00000457016	16/16	6138/11025	5758/8532	1920/2843	R/*	Cga/Tga
DC_A	TCGA.CA.6717.01	colorectal	APC	GRCh37	5	112175466	112175466	Nonsense_Mutation	SNP	C	C	A	c.4175C>A	p.Ser1392Ter	p.S1392*	ENST00000457016	16/16	4555/11025	4175/8532	1392/2843	S/*	tCa/tAa
DC_A	TCGA.CA.6718.01	colorectal	APC	GRCh37	5	112174631	112174631	Nonsense_Mutation	SNP	C	C	T	c.3340C>T	p.Arg1114Ter	p.R1114*	ENST00000457016	16/16	3720/11025	3340/8532	1114/2843	R/*	Cga/Tga
DC_A	TCGA.CA.6718.01	colorectal	APC	GRCh37	5	112175951	112175952	Frame_Shift_Ins	INS	-	-	A	c.4666dupA	p.Thr1556AsnfsTer3	p.T1556Nfs*3	ENST00000457016	16/16	5040-5041/11025	4660-4661/8532	1554/2843	E/EX	gaa/gAaa
DC_A	TCGA.CI.6619.01	colorectal	APC	GRCh37	5	112175358	112175358	Nonsense_Mutation	SNP	C	C	G	c.4067C>G	p.Ser1356Ter	p.S1356*	ENST00000457016	16/16	4447/11025	4067/8532	1356/2843	S/*	tCa/tGa
DC_A	TCGA.CI.6620.01	colorectal	APC	GRCh37	5	112173917	112173917	Nonsense_Mutation	SNP	C	C	T	c.2626C>T	p.Arg876Ter	p.R876*	ENST00000457016	16/16	3006/11025	2626/8532	876/2843	R/*	Cga/Tga
DC_A	TCGA.CI.6621.01	colorectal	APC	GRCh37	5	112175348	112175348	Nonsense_Mutation	SNP	G	G	T	c.4057G>T	p.Glu1353Ter	p.E1353*	ENST00000457016	16/16	4437/11025	4057/8532	1353/2843	E/*	Gaa/Taa
DC_A	TCGA.CI.6622.01	colorectal	APC	GRCh37	5	112175423	112175423	Nonsense_Mutation	SNP	C	C	T	c.4132C>T	p.Gln1378Ter	p.Q1378*	ENST00000457016	16/16	4512/11025	4132/8532	1378/2843	Q/*	Cag/Tag
DC_A	TCGA.CI.6622.01	colorectal	APC	GRCh37	5	112116592	112116592	Nonsense_Mutation	SNP	C	C	T	c.637C>T	p.Arg213Ter	p.R213*	ENST00000457016	6/16	1017/11025	637/8532	213/2843	R/*	Cga/Tga
DC_A	TCGA.CI.6624.01	colorectal	APC	GRCh37	5	112174631	112174631	Nonsense_Mutation	SNP	C	C	T	c.3340C>T	p.Arg1114Ter	p.R1114*	ENST00000457016	16/16	3720/11025	3340/8532	1114/2843	R/*	Cga/Tga
DC_A	TCGA.CI.6624.01	colorectal	APC	GRCh37	5	112175480	112175480	Nonsense_Mutation	SNP	G	G	T	c.4189G>T	p.Glu1397Ter	p.E1397*	ENST00000457016	16/16	4569/11025	4189/8532	1397/2843	E/*	Gag/Tag
DC_A	TCGA.CK.4947.01	colorectal	APC	GRCh37	5	112128143	112128143	Nonsense_Mutation	SNP	C	C	T	c.646C>T	p.Arg216Ter	p.R216*	ENST00000457016	7/16	1026/11025	646/8532	216/2843	R/*	Cga/Tga
DC_A	TCGA.CK.4948.01	colorectal	APC	GRCh37	5	112174466	112174466	Nonsense_Mutation	SNP	G	G	T	c.3175G>T	p.Glu1059Ter	p.E1059*	ENST00000457016	16/16	3555/11025	3175/8532	1059/2843	E/*	Gaa/Taa
DC_A	TCGA.CK.4950.01	colorectal	APC	GRCh37	5	112175639	112175639	Nonsense_Mutation	SNP	C	C	T	c.4348C>T	p.Arg1450Ter	p.R1450*	ENST00000457016	16/16	4728/11025	4348/8532	1450/2843	R/*	Cga/Tga
DC_A	TCGA.CK.4952.01	colorectal	APC	GRCh37	5	112175951	112175952	Frame_Shift_Ins	INS	-	-	A	c.4666dupA	p.Thr1556AsnfsTer3	p.T1556Nfs*3	ENST00000457016	16/16	5040-5041/11025	4660-4661/8532	1554/2843	E/EX	gaa/gAaa
DC_A	TCGA.CK.5913.01	colorectal	RNF43	GRCh37	17	56435161	56435161	Frame_Shift_Del	DEL	C	C	-	c.1976delG	p.Gly659ValfsTer41	p.G659Vfs*41	ENST00000584437	8/9	3932/5575	1976/2352	659/783	G/X	gGt/gt
DC_A	TCGA.CK.5913.01	colorectal	RNF43	GRCh37	17	56448297	56448298	Frame_Shift_Ins	INS	-	-	G	c.349dupC	p.Arg117ProfsTer8	p.R117Pfs*8	ENST00000584437	2/9	2305-2306/5575	349-350/2352	117/783	R/PX	cgc/cCgc
DC_A	TCGA.CK.5914.01	colorectal	APC	GRCh37	5	112128143	112128143	Nonsense_Mutation	SNP	C	C	T	c.646C>T	p.Arg216Ter	p.R216*	ENST00000457016	7/16	1026/11025	646/8532	216/2843	R/*	Cga/Tga
DC_A	TCGA.CK.5914.01	colorectal	APC	GRCh37	5	112175212	112175216	Frame_Shift_Del	DEL	AAAAG	AAAAG	-	c.3927_3931delAAAGA	p.Glu1309AspfsTer4	p.E1309Dfs*4	ENST00000457016	16/16	4301-4305/11025	3921-3925/8532	1307-1309/2843	IKE/IX	atAAAAGaa/ataa
DC_A	TCGA.CK.5915.01	colorectal	APC	GRCh37	5	112155042	112155042	Splice_Site	SNP	G	G	C	c.1312+1G>C		p.X438_splice	ENST00000457016		-/11025	1312/8532	438/2843
DC_A	TCGA.CK.5916.01	colorectal	RNF43	GRCh37	17	56448292	56448293	Frame_Shift_Ins	INS	-	-	G	c.354dupC	p.Cys119LeufsTer6	p.C119Lfs*6	ENST00000584437	2/9	2310-2311/5575	354-355/2352	118-119/783	-/X	-/C
DC_A	TCGA.CL.4957.01	colorectal	APC	GRCh37	5	112175639	112175639	Nonsense_Mutation	SNP	C	C	T	c.4348C>T	p.Arg1450Ter	p.R1450*	ENST00000457016	16/16	4728/11025	4348/8532	1450/2843	R/*	Cga/Tga
DC_A	TCGA.CL.4957.01	colorectal	APC	GRCh37	5	112175101	112175101	Nonsense_Mutation	SNP	T	T	A	c.3810T>A	p.Cys1270Ter	p.C1270*	ENST00000457016	16/16	4190/11025	3810/8532	1270/2843	C/*	tgT/tgA
DC_A	TCGA.CL.5917.01	colorectal	APC	GRCh37	5	112173917	112173917	Nonsense_Mutation	SNP	C	C	T	c.2626C>T	p.Arg876Ter	p.R876*	ENST00000457016	16/16	3006/11025	2626/8532	876/2843	R/*	Cga/Tga
DC_A	TCGA.CL.5917.01	colorectal	APC	GRCh37	5	112175539	112175539	Frame_Shift_Del	DEL	C	C	-	c.4248delC	p.Ile1417LeufsTer2	p.I1417Lfs*2	ENST00000457016	16/16	4628/11025	4248/8532	1416/2843	G/X	ggC/gg
DC_A	TCGA.CL.5918.01	colorectal	APC	GRCh37	5	112175271	112175271	Nonsense_Mutation	SNP	C	C	A	c.3980C>A	p.Ser1327Ter	p.S1327*	ENST00000457016	16/16	4360/11025	3980/8532	1327/2843	S/*	tCa/tAa
DC_A	TCGA.CM.4744.01	colorectal	APC	GRCh37	5	112175720	112175720	Nonsense_Mutation	SNP	C	C	T	c.4429C>T	p.Gln1477Ter	p.Q1477*	ENST00000457016	16/16	4809/11025	4429/8532	1477/2843	Q/*	Cag/Tag
DC_A	TCGA.CM.4746.01	colorectal	APC	GRCh37	5	112164664	112164664	Frame_Shift_Del	DEL	A	A	-	c.1742delA	p.Lys581ArgfsTer9	p.K581Rfs*9	ENST00000457016	14/16	2118/11025	1738/8532	580/2843	K/X	Aaa/aa
DC_A	TCGA.CM.4750.01	colorectal	APC	GRCh37	5	112175212	112175216	Frame_Shift_Del	DEL	AAAAG	AAAAG	-	c.3927_3931delAAAGA	p.Glu1309AspfsTer4	p.E1309Dfs*4	ENST00000457016	16/16	4301-4305/11025	3921-3925/8532	1307-1309/2843	IKE/IX	atAAAAGaa/ataa
DC_A	TCGA.CM.4752.01	colorectal	APC	GRCh37	5	112175676	112175679	Frame_Shift_Del	DEL	AGAG	AGAG	-	c.4391_4394delAGAG	p.Glu1464ValfsTer8	p.E1464Vfs*8	ENST00000457016	16/16	4765-4768/11025	4385-4388/8532	1462-1463/2843	KR/X	aAGAGa/aa
DC_A	TCGA.CM.5341.01	colorectal	APC	GRCh37	5	112128143	112128143	Nonsense_Mutation	SNP	C	C	T	c.646C>T	p.Arg216Ter	p.R216*	ENST00000457016	7/16	1026/11025	646/8532	216/2843	R/*	Cga/Tga
DC_A	TCGA.CM.5349.01	colorectal	APC	GRCh37	5	112174631	112174631	Nonsense_Mutation	SNP	C	C	T	c.3340C>T	p.Arg1114Ter	p.R1114*	ENST00000457016	16/16	3720/11025	3340/8532	1114/2843	R/*	Cga/Tga
DC_A	TCGA.CM.5349.01	colorectal	APC	GRCh37	5	112175606	112175606	Frame_Shift_Del	DEL	C	C	-	c.4316delC	p.Pro1439LeufsTer34	p.P1439Lfs*34	ENST00000457016	16/16	4695/11025	4315/8532	1439/2843	P/X	Cct/ct
DC_A	TCGA.CM.5861.01	colorectal	RNF43	GRCh37	17	56435161	56435161	Frame_Shift_Del	DEL	C	C	-	c.1976delG	p.Gly659ValfsTer41	p.G659Vfs*41	ENST00000584437	8/9	3932/5575	1976/2352	659/783	G/X	gGt/gt
DC_A	TCGA.CM.5862.01	colorectal	APC	GRCh37	5	112174173	112174174	Frame_Shift_Ins	INS	-	-	TGATAGTTTAAATAGTG	c.2884_2900dupGATAGTTTAAATAGTGT	p.Ser968IlefsTer3	p.S968Ifs*3	ENST00000457016	16/16	3262-3263/11025	2882-2883/8532	961/2843	N/NDSLNSX	aat/aaTGATAGTTTAAATAGTGt
DC_A	TCGA.CM.5863.01	colorectal	APC	GRCh37	5	112174631	112174631	Nonsense_Mutation	SNP	C	C	T	c.3340C>T	p.Arg1114Ter	p.R1114*	ENST00000457016	16/16	3720/11025	3340/8532	1114/2843	R/*	Cga/Tga
DC_A	TCGA.CM.5863.01	colorectal	APC	GRCh37	5	112175756	112175756	Frame_Shift_Del	DEL	T	T	-	c.4466delT	p.Leu1489TyrfsTer18	p.L1489Yfs*18	ENST00000457016	16/16	4845/11025	4465/8532	1489/2843	L/X	Tta/ta
DC_A	TCGA.CM.5864.01	colorectal	APC	GRCh37	5	112175480	112175480	Nonsense_Mutation	SNP	G	G	T	c.4189G>T	p.Glu1397Ter	p.E1397*	ENST00000457016	16/16	4569/11025	4189/8532	1397/2843	E/*	Gag/Tag
DC_A	TCGA.CM.6162.01	colorectal	RNF43	GRCh37	17	56440904	56440904	Nonsense_Mutation	SNP	G	G	A	c.433C>T	p.Arg145Ter	p.R145*	ENST00000584437	3/9	2389/5575	433/2352	145/783	R/*	Cga/Tga
DC_A	TCGA.CM.6163.01	colorectal	APC	GRCh37	5	112116592	112116592	Nonsense_Mutation	SNP	C	C	T	c.637C>T	p.Arg213Ter	p.R213*	ENST00000457016	6/16	1017/11025	637/8532	213/2843	R/*	Cga/Tga
DC_A	TCGA.CM.6164.01	colorectal	APC	GRCh37	5	112128191	112128191	Nonsense_Mutation	SNP	C	C	T	c.694C>T	p.Arg232Ter	p.R232*	ENST00000457016	7/16	1074/11025	694/8532	232/2843	R/*	Cga/Tga
DC_A	TCGA.CM.6165.01	colorectal	APC	GRCh37	5	112175493	112175493	Frame_Shift_Del	DEL	T	T	-	c.4203delT	p.Ile1401MetfsTer14	p.I1401Mfs*14	ENST00000457016	16/16	4582/11025	4202/8532	1401/2843	I/X	aTt/at
DC_A	TCGA.CM.6166.01	colorectal	APC	GRCh37	5	112175507	112175507	Nonsense_Mutation	SNP	C	C	T	c.4216C>T	p.Gln1406Ter	p.Q1406*	ENST00000457016	16/16	4596/11025	4216/8532	1406/2843	Q/*	Cag/Tag
DC_A	TCGA.CM.6168.01	colorectal	APC	GRCh37	5	112162891	112162891	Nonsense_Mutation	SNP	C	C	T	c.1495C>T	p.Arg499Ter	p.R499*	ENST00000457016	12/16	1875/11025	1495/8532	499/2843	R/*	Cga/Tga
DC_A	TCGA.CM.6168.01	colorectal	APC	GRCh37	5	112175687	112175687	Nonsense_Mutation	SNP	G	G	T	c.4396G>T	p.Gly1466Ter	p.G1466*	ENST00000457016	16/16	4776/11025	4396/8532	1466/2843	G/*	Gga/Tga
DC_A	TCGA.CM.6170.01	colorectal	APC	GRCh37	5	112162891	112162891	Nonsense_Mutation	SNP	C	C	T	c.1495C>T	p.Arg499Ter	p.R499*	ENST00000457016	12/16	1875/11025	1495/8532	499/2843	R/*	Cga/Tga
DC_A	TCGA.CM.6171.01	colorectal	RNF43	GRCh37	17	56435161	56435161	Frame_Shift_Del	DEL	C	C	-	c.1976delG	p.Gly659ValfsTer41	p.G659Vfs*41	ENST00000584437	8/9	3932/5575	1976/2352	659/783	G/X	gGt/gt
DC_A	TCGA.CM.6172.01	colorectal	APC	GRCh37	5	112128143	112128143	Nonsense_Mutation	SNP	C	C	T	c.646C>T	p.Arg216Ter	p.R216*	ENST00000457016	7/16	1026/11025	646/8532	216/2843	R/*	Cga/Tga
DC_A	TCGA.CM.6172.01	colorectal	APC	GRCh37	5	112175423	112175423	Nonsense_Mutation	SNP	C	C	T	c.4132C>T	p.Gln1378Ter	p.Q1378*	ENST00000457016	16/16	4512/11025	4132/8532	1378/2843	Q/*	Cag/Tag
DC_A	TCGA.CM.6172.01	colorectal	APC	GRCh37	5	112116592	112116592	Nonsense_Mutation	SNP	C	C	T	c.637C>T	p.Arg213Ter	p.R213*	ENST00000457016	6/16	1017/11025	637/8532	213/2843	R/*	Cga/Tga
DC_A	TCGA.CM.6674.01	colorectal	RNF43	GRCh37	17	56448298	56448298	Frame_Shift_Del	DEL	G	G	-	c.349delC	p.Arg117AlafsTer41	p.R117Afs*41	ENST00000584437	2/9	2305/5575	349/2352	117/783	R/X	Cgc/gc
DC_A	TCGA.CM.6675.01	colorectal	CTNNB1	GRCh37	3	41266125	41266125	Missense_Mutation	SNP	C	C	T	c.122C>T	p.Thr41Ile	p.T41I	ENST00000349496	3/15	402/3729	122/2346	41/781	T/I	aCc/aTc
DC_A	TCGA.CM.6676.01	colorectal	APC	GRCh37	5	112164616	112164616	Nonsense_Mutation	SNP	C	C	T	c.1690C>T	p.Arg564Ter	p.R564*	ENST00000457016	14/16	2070/11025	1690/8532	564/2843	R/*	Cga/Tga
DC_A	TCGA.CM.6676.01	colorectal	APC	GRCh37	5	112175480	112175480	Nonsense_Mutation	SNP	G	G	T	c.4189G>T	p.Glu1397Ter	p.E1397*	ENST00000457016	16/16	4569/11025	4189/8532	1397/2843	E/*	Gag/Tag
DC_A	TCGA.CM.6678.01	colorectal	APC	GRCh37	5	112174112	112174112	Nonsense_Mutation	SNP	G	G	T	c.2821G>T	p.Glu941Ter	p.E941*	ENST00000457016	16/16	3201/11025	2821/8532	941/2843	E/*	Gaa/Taa
DC_A	TCGA.CM.6678.01	colorectal	APC	GRCh37	5	112175596	112175597	Frame_Shift_Ins	INS	-	-	AG	c.4306_4307dupAG	p.Ser1436ArgfsTer38	p.S1436Rfs*38	ENST00000457016	16/16	4685-4686/11025	4305-4306/8532	1435-1436/2843	-/X	-/AG
DC_A	TCGA.CM.6679.01	colorectal	APC	GRCh37	5	112170863	112170863	Splice_Site	SNP	G	G	A	c.1958+1G>A		p.X653_splice	ENST00000457016		-/11025	1958/8532	653/2843
DC_A	TCGA.CM.6680.01	colorectal	APC	GRCh37	5	112164616	112164616	Nonsense_Mutation	SNP	C	C	T	c.1690C>T	p.Arg564Ter	p.R564*	ENST00000457016	14/16	2070/11025	1690/8532	564/2843	R/*	Cga/Tga
DC_A	TCGA.D5.5537.01	colorectal	APC	GRCh37	5	112175639	112175639	Nonsense_Mutation	SNP	C	C	T	c.4348C>T	p.Arg1450Ter	p.R1450*	ENST00000457016	16/16	4728/11025	4348/8532	1450/2843	R/*	Cga/Tga
DC_A	TCGA.D5.5537.01	colorectal	APC	GRCh37	5	112174027	112174036	Frame_Shift_Del	DEL	ACATTGTGTG	ACATTGTGTG	-	c.2739_2748delTTGTGTGACA	p.His913GlnfsTer39	p.H913Qfs*39	ENST00000457016	16/16	3116-3125/11025	2736-2745/8532	912-915/2843	LHCV/X	ttACATTGTGTG/tt
DC_A	TCGA.D5.5538.01	colorectal	APC	GRCh37	5	112175696	112175696	Nonsense_Mutation	SNP	C	C	T	c.4405C>T	p.Gln1469Ter	p.Q1469*	ENST00000457016	16/16	4785/11025	4405/8532	1469/2843	Q/*	Caa/Taa
DC_A	TCGA.D5.5538.01	colorectal	APC	GRCh37	5	112174937	112174937	Nonsense_Mutation	SNP	G	G	T	c.3646G>T	p.Glu1216Ter	p.E1216*	ENST00000457016	16/16	4026/11025	3646/8532	1216/2843	E/*	Gag/Tag
DC_A	TCGA.D5.5539.01	colorectal	APC	GRCh37	5	112175639	112175639	Nonsense_Mutation	SNP	C	C	T	c.4348C>T	p.Arg1450Ter	p.R1450*	ENST00000457016	16/16	4728/11025	4348/8532	1450/2843	R/*	Cga/Tga
DC_A	TCGA.D5.5540.01	colorectal	APC	GRCh37	5	112175440	112175441	Frame_Shift_Ins	INS	-	-	T	c.4152dupT	p.Ser1385Ter	p.S1385*	ENST00000457016	16/16	4529-4530/11025	4149-4150/8532	1383-1384/2843	-/X	-/T
DC_A	TCGA.D5.6531.01	colorectal	APC	GRCh37	5	112175770	112175770	Frame_Shift_Del	DEL	G	G	-	c.4480delG	p.Glu1494LysfsTer13	p.E1494Kfs*13	ENST00000457016	16/16	4859/11025	4479/8532	1493/2843	T/X	acG/ac
DC_A	TCGA.D5.6532.01	colorectal	APC	GRCh37	5	112175246	112175246	Frame_Shift_Del	DEL	C	C	-	c.3956delC	p.Pro1319LeufsTer2	p.P1319Lfs*2	ENST00000457016	16/16	4335/11025	3955/8532	1319/2843	P/X	Cct/ct
DC_A	TCGA.D5.6532.01	colorectal	APC	GRCh37	5	112116592	112116592	Nonsense_Mutation	SNP	C	C	T	c.637C>T	p.Arg213Ter	p.R213*	ENST00000457016	6/16	1017/11025	637/8532	213/2843	R/*	Cga/Tga
DC_A	TCGA.D5.6533.01	colorectal	APC	GRCh37	5	112174043	112174043	Nonsense_Mutation	SNP	G	G	T	c.2752G>T	p.Glu918Ter	p.E918*	ENST00000457016	16/16	3132/11025	2752/8532	918/2843	E/*	Gag/Tag
DC_A	TCGA.D5.6533.01	colorectal	APC	GRCh37	5	112175755	112175771	Frame_Shift_Del	DEL	ATTACATTTTGCCACGG	ATTACATTTTGCCACGG	-	c.4465_4481delTTACATTTTGCCACGGA	p.Leu1489LysfsTer19	p.L1489Kfs*19	ENST00000457016	16/16	4844-4860/11025	4464-4480/8532	1488-1494/2843	LLHFATE/LX	ttATTACATTTTGCCACGGaa/ttaa
DC_A	TCGA.D5.6535.01	colorectal	APC	GRCh37	5	112175639	112175639	Nonsense_Mutation	SNP	C	C	T	c.4348C>T	p.Arg1450Ter	p.R1450*	ENST00000457016	16/16	4728/11025	4348/8532	1450/2843	R/*	Cga/Tga
DC_A	TCGA.D5.6536.01	colorectal	APC	GRCh37	5	112175541	112175542	Frame_Shift_Ins	INS	-	-	TA	c.4253_4254dupTA	p.Ser1419Ter	p.S1419*	ENST00000457016	16/16	4630-4631/11025	4250-4251/8532	1417/2843	I/IX	att/atTAt
DC_A	TCGA.D5.6537.01	colorectal	APC	GRCh37	5	112175212	112175216	Frame_Shift_Del	DEL	AAAAG	AAAAG	-	c.3927_3931delAAAGA	p.Glu1309AspfsTer4	p.E1309Dfs*4	ENST00000457016	16/16	4301-4305/11025	3921-3925/8532	1307-1309/2843	IKE/IX	atAAAAGaa/ataa
DC_A	TCGA.D5.6538.01	colorectal	APC	GRCh37	5	112174631	112174631	Nonsense_Mutation	SNP	C	C	T	c.3340C>T	p.Arg1114Ter	p.R1114*	ENST00000457016	16/16	3720/11025	3340/8532	1114/2843	R/*	Cga/Tga
DC_A	TCGA.D5.6538.01	colorectal	APC	GRCh37	5	112175572	112175573	Frame_Shift_Ins	INS	-	-	GG	c.4282_4283dupGG	p.Gln1429AspfsTer45	p.Q1429Dfs*45	ENST00000457016	16/16	4661-4662/11025	4281-4282/8532	1427-1428/2843	-/X	-/GG
DC_A	TCGA.D5.6540.01	colorectal	APC	GRCh37	5	112173831	112173831	Frame_Shift_Del	DEL	A	A	-	c.2544delA	p.Asp849IlefsTer12	p.D849Ifs*12	ENST00000457016	16/16	2920/11025	2540/8532	847/2843	E/X	gAa/ga
DC_A	TCGA.D5.6898.01	colorectal	APC	GRCh37	5	112175390	112175390	Nonsense_Mutation	SNP	C	C	T	c.4099C>T	p.Gln1367Ter	p.Q1367*	ENST00000457016	16/16	4479/11025	4099/8532	1367/2843	Q/*	Cag/Tag
DC_A	TCGA.D5.6920.01	colorectal	APC	GRCh37	5	112128191	112128191	Nonsense_Mutation	SNP	C	C	T	c.694C>T	p.Arg232Ter	p.R232*	ENST00000457016	7/16	1074/11025	694/8532	232/2843	R/*	Cga/Tga
DC_A	TCGA.D5.6922.01	colorectal	APC	GRCh37	5	112175639	112175639	Nonsense_Mutation	SNP	C	C	T	c.4348C>T	p.Arg1450Ter	p.R1450*	ENST00000457016	16/16	4728/11025	4348/8532	1450/2843	R/*	Cga/Tga
DC_A	TCGA.D5.6924.01	colorectal	APC	GRCh37	5	112162891	112162891	Nonsense_Mutation	SNP	C	C	T	c.1495C>T	p.Arg499Ter	p.R499*	ENST00000457016	12/16	1875/11025	1495/8532	499/2843	R/*	Cga/Tga
DC_A	TCGA.D5.6926.01	colorectal	APC	GRCh37	5	112128191	112128191	Nonsense_Mutation	SNP	C	C	T	c.694C>T	p.Arg232Ter	p.R232*	ENST00000457016	7/16	1074/11025	694/8532	232/2843	R/*	Cga/Tga
DC_A	TCGA.D5.6926.01	colorectal	APC	GRCh37	5	112175162	112175162	Nonsense_Mutation	SNP	C	C	T	c.3871C>T	p.Gln1291Ter	p.Q1291*	ENST00000457016	16/16	4251/11025	3871/8532	1291/2843	Q/*	Cag/Tag
DC_A	TCGA.D5.6928.01	colorectal	RNF43	GRCh37	17	56435161	56435161	Frame_Shift_Del	DEL	C	C	-	c.1976delG	p.Gly659ValfsTer41	p.G659Vfs*41	ENST00000584437	8/9	3932/5575	1976/2352	659/783	G/X	gGt/gt
DC_A	TCGA.D5.6930.01	colorectal	RNF43	GRCh37	17	56435161	56435161	Frame_Shift_Del	DEL	C	C	-	c.1976delG	p.Gly659ValfsTer41	p.G659Vfs*41	ENST00000584437	8/9	3932/5575	1976/2352	659/783	G/X	gGt/gt
DC_A	TCGA.D5.6931.01	colorectal	APC	GRCh37	5	112173917	112173917	Nonsense_Mutation	SNP	C	C	T	c.2626C>T	p.Arg876Ter	p.R876*	ENST00000457016	16/16	3006/11025	2626/8532	876/2843	R/*	Cga/Tga
DC_A	TCGA.D5.6932.01	colorectal	APC	GRCh37	5	112174631	112174631	Nonsense_Mutation	SNP	C	C	T	c.3340C>T	p.Arg1114Ter	p.R1114*	ENST00000457016	16/16	3720/11025	3340/8532	1114/2843	R/*	Cga/Tga
DC_A	TCGA.D5.7000.01	colorectal	APC	GRCh37	5	112175639	112175639	Nonsense_Mutation	SNP	C	C	T	c.4348C>T	p.Arg1450Ter	p.R1450*	ENST00000457016	16/16	4728/11025	4348/8532	1450/2843	R/*	Cga/Tga
DC_A	TCGA.DC.4749.01	colorectal	APC	GRCh37	5	112162891	112162891	Nonsense_Mutation	SNP	C	C	T	c.1495C>T	p.Arg499Ter	p.R499*	ENST00000457016	12/16	1875/11025	1495/8532	499/2843	R/*	Cga/Tga
DC_A	TCGA.DC.4749.01	colorectal	APC	GRCh37	5	112175576	112175576	Nonsense_Mutation	SNP	C	C	T	c.4285C>T	p.Gln1429Ter	p.Q1429*	ENST00000457016	16/16	4665/11025	4285/8532	1429/2843	Q/*	Caa/Taa
DC_A	TCGA.DC.5337.01	colorectal	APC	GRCh37	5	112175639	112175639	Nonsense_Mutation	SNP	C	C	T	c.4348C>T	p.Arg1450Ter	p.R1450*	ENST00000457016	16/16	4728/11025	4348/8532	1450/2843	R/*	Cga/Tga
DC_A	TCGA.DC.5869.01	colorectal	APC	GRCh37	5	112170821	112170824	Frame_Shift_Del	DEL	ACGG	ACGG	-	c.1918_1921delCGGA	p.Arg640MetfsTer5	p.R640Mfs*5	ENST00000457016	15/16	2297-2300/11025	1917-1920/8532	639-640/2843	LR/X	ttACGG/tt
DC_A	TCGA.DC.6154.01	colorectal	APC	GRCh37	5	112175348	112175348	Nonsense_Mutation	SNP	G	G	T	c.4057G>T	p.Glu1353Ter	p.E1353*	ENST00000457016	16/16	4437/11025	4057/8532	1353/2843	E/*	Gaa/Taa
DC_A	TCGA.DC.6157.01	colorectal	APC	GRCh37	5	112175576	112175576	Nonsense_Mutation	SNP	C	C	T	c.4285C>T	p.Gln1429Ter	p.Q1429*	ENST00000457016	16/16	4665/11025	4285/8532	1429/2843	Q/*	Caa/Taa
DC_A	TCGA.DC.6157.01	colorectal	APC	GRCh37	5	112173917	112173917	Nonsense_Mutation	SNP	C	C	T	c.2626C>T	p.Arg876Ter	p.R876*	ENST00000457016	16/16	3006/11025	2626/8532	876/2843	R/*	Cga/Tga
DC_A	TCGA.DC.6158.01	colorectal	APC	GRCh37	5	112175324	112175324	Nonsense_Mutation	SNP	G	G	T	c.4033G>T	p.Glu1345Ter	p.E1345*	ENST00000457016	16/16	4413/11025	4033/8532	1345/2843	E/*	Gaa/Taa
DC_A	TCGA.DC.6681.01	colorectal	APC	GRCh37	5	112175951	112175952	Frame_Shift_Ins	INS	-	-	A	c.4666dupA	p.Thr1556AsnfsTer3	p.T1556Nfs*3	ENST00000457016	16/16	5040-5041/11025	4660-4661/8532	1554/2843	E/EX	gaa/gAaa
DC_A	TCGA.DC.6683.01	colorectal	APC	GRCh37	5	112175756	112175756	Frame_Shift_Del	DEL	T	T	-	c.4466delT	p.Leu1489TyrfsTer18	p.L1489Yfs*18	ENST00000457016	16/16	4845/11025	4465/8532	1489/2843	L/X	Tta/ta
DC_A	TCGA.DC.6683.01	colorectal	APC	GRCh37	5	112175752	112175752	Frame_Shift_Del	DEL	T	T	-	c.4463delT	p.Leu1488TyrfsTer19	p.L1488Yfs*19	ENST00000457016	16/16	4841/11025	4461/8532	1487/2843	T/X	acT/ac
DC_A	TCGA.DM.A0X9.01	colorectal	APC	GRCh37	5	112116592	112116592	Nonsense_Mutation	SNP	C	C	T	c.637C>T	p.Arg213Ter	p.R213*	ENST00000457016	6/16	1017/11025	637/8532	213/2843	R/*	Cga/Tga
DC_A	TCGA.DM.A0X9.01	colorectal	APC	GRCh37	5	112175480	112175480	Nonsense_Mutation	SNP	G	G	T	c.4189G>T	p.Glu1397Ter	p.E1397*	ENST00000457016	16/16	4569/11025	4189/8532	1397/2843	E/*	Gag/Tag
DC_A	TCGA.DM.A0XD.01	colorectal	APC	GRCh37	5	112174096	112174096	Nonsense_Mutation	SNP	C	C	A	c.2805C>A	p.Tyr935Ter	p.Y935*	ENST00000457016	16/16	3185/11025	2805/8532	935/2843	Y/*	taC/taA
DC_A	TCGA.DM.A0XD.01	colorectal	APC	GRCh37	5	112175628	112175628	Frame_Shift_Del	DEL	C	C	-	c.4337delC	p.Ala1446ValfsTer27	p.A1446Vfs*27	ENST00000457016	16/16	4717/11025	4337/8532	1446/2843	A/X	gCt/gt
DC_A	TCGA.DM.A0XF.01	colorectal	APC	GRCh37	5	112175212	112175216	Frame_Shift_Del	DEL	AAAAG	AAAAG	-	c.3927_3931delAAAGA	p.Glu1309AspfsTer4	p.E1309Dfs*4	ENST00000457016	16/16	4301-4305/11025	3921-3925/8532	1307-1309/2843	IKE/IX	atAAAAGaa/ataa
DC_A	TCGA.DM.A0XF.01	colorectal	APC	GRCh37	5	112174916	112174916	Nonsense_Mutation	SNP	G	G	T	c.3625G>T	p.Glu1209Ter	p.E1209*	ENST00000457016	16/16	4005/11025	3625/8532	1209/2843	E/*	Gaa/Taa
DC_A	TCGA.DM.A1D0.01	colorectal	APC	GRCh37	5	112175513	112175513	Nonsense_Mutation	SNP	G	G	T	c.4222G>T	p.Glu1408Ter	p.E1408*	ENST00000457016	16/16	4602/11025	4222/8532	1408/2843	E/*	Gaa/Taa
DC_A	TCGA.DM.A1D6.01	colorectal	APC	GRCh37	5	112175235	112175235	Nonsense_Mutation	SNP	C	C	G	c.3944C>G	p.Ser1315Ter	p.S1315*	ENST00000457016	16/16	4324/11025	3944/8532	1315/2843	S/*	tCa/tGa
DC_A	TCGA.DM.A1D7.01	colorectal	APC	GRCh37	5	112173917	112173917	Nonsense_Mutation	SNP	C	C	T	c.2626C>T	p.Arg876Ter	p.R876*	ENST00000457016	16/16	3006/11025	2626/8532	876/2843	R/*	Cga/Tga
DC_A	TCGA.DM.A1D7.01	colorectal	APC	GRCh37	5	112176028	112176029	Frame_Shift_Ins	INS	-	-	A	c.4738dupA	p.Ile1580AsnfsTer11	p.I1580Nfs*11	ENST00000457016	16/16	5117-5118/11025	4737-4738/8532	1579-1580/2843	-/X	-/A
DC_A	TCGA.DM.A1D8.01	colorectal	APC	GRCh37	5	112173917	112173917	Nonsense_Mutation	SNP	C	C	T	c.2626C>T	p.Arg876Ter	p.R876*	ENST00000457016	16/16	3006/11025	2626/8532	876/2843	R/*	Cga/Tga
DC_A	TCGA.DM.A1D8.01	colorectal	APC	GRCh37	5	112175951	112175952	Frame_Shift_Ins	INS	-	-	A	c.4666dupA	p.Thr1556AsnfsTer3	p.T1556Nfs*3	ENST00000457016	16/16	5040-5041/11025	4660-4661/8532	1554/2843	E/EX	gaa/gAaa
DC_A	TCGA.DM.A1DA.01	colorectal	APC	GRCh37	5	112175513	112175513	Nonsense_Mutation	SNP	G	G	T	c.4222G>T	p.Glu1408Ter	p.E1408*	ENST00000457016	16/16	4602/11025	4222/8532	1408/2843	E/*	Gaa/Taa
DC_A	TCGA.DM.A1DA.01	colorectal	APC	GRCh37	5	112174437	112174437	Nonsense_Mutation	SNP	G	G	A	c.3146G>A	p.Trp1049Ter	p.W1049*	ENST00000457016	16/16	3526/11025	3146/8532	1049/2843	W/*	tGg/tAg
DC_A	TCGA.DM.A1DB.01	colorectal	APC	GRCh37	5	112164616	112164616	Nonsense_Mutation	SNP	C	C	T	c.1690C>T	p.Arg564Ter	p.R564*	ENST00000457016	14/16	2070/11025	1690/8532	564/2843	R/*	Cga/Tga
DC_A	TCGA.DM.A1HA.01	colorectal	APC	GRCh37	5	112175532	112175532	Frame_Shift_Del	DEL	T	T	-	c.4241delT	p.Val1414GlufsTer5	p.V1414Efs*5	ENST00000457016	16/16	4621/11025	4241/8532	1414/2843	V/X	gTa/ga
DC_A	TCGA.DM.A282.01	colorectal	APC	GRCh37	5	112175390	112175390	Nonsense_Mutation	SNP	C	C	T	c.4099C>T	p.Gln1367Ter	p.Q1367*	ENST00000457016	16/16	4479/11025	4099/8532	1367/2843	Q/*	Cag/Tag
DC_A	TCGA.DM.A285.01	colorectal	APC	GRCh37	5	112175513	112175513	Nonsense_Mutation	SNP	G	G	T	c.4222G>T	p.Glu1408Ter	p.E1408*	ENST00000457016	16/16	4602/11025	4222/8532	1408/2843	E/*	Gaa/Taa
DC_A	TCGA.DM.A28C.01	colorectal	APC	GRCh37	5	112162891	112162891	Nonsense_Mutation	SNP	C	C	T	c.1495C>T	p.Arg499Ter	p.R499*	ENST00000457016	12/16	1875/11025	1495/8532	499/2843	R/*	Cga/Tga
DC_A	TCGA.DM.A28E.01	colorectal	APC	GRCh37	5	112175647	112175647	Frame_Shift_Del	DEL	A	A	-	c.4356delA	p.Pro1453LeufsTer20	p.P1453Lfs*20	ENST00000457016	16/16	4736/11025	4356/8532	1452/2843	V/X	gtA/gt
DC_A	TCGA.DM.A28F.01	colorectal	APC	GRCh37	5	112173917	112173917	Nonsense_Mutation	SNP	C	C	T	c.2626C>T	p.Arg876Ter	p.R876*	ENST00000457016	16/16	3006/11025	2626/8532	876/2843	R/*	Cga/Tga
DC_A	TCGA.DM.A28G.01	colorectal	APC	GRCh37	5	112175480	112175480	Nonsense_Mutation	SNP	G	G	T	c.4189G>T	p.Glu1397Ter	p.E1397*	ENST00000457016	16/16	4569/11025	4189/8532	1397/2843	E/*	Gag/Tag
DC_A	TCGA.DM.A28H.01	colorectal	APC	GRCh37	5	112175639	112175639	Nonsense_Mutation	SNP	C	C	T	c.4348C>T	p.Arg1450Ter	p.R1450*	ENST00000457016	16/16	4728/11025	4348/8532	1450/2843	R/*	Cga/Tga
DC_A	TCGA.DM.A28K.01	colorectal	APC	GRCh37	5	112175951	112175952	Frame_Shift_Ins	INS	-	-	A	c.4666dupA	p.Thr1556AsnfsTer3	p.T1556Nfs*3	ENST00000457016	16/16	5040-5041/11025	4660-4661/8532	1554/2843	E/EX	gaa/gAaa
DC_A	TCGA.DM.A28M.01	colorectal	APC	GRCh37	5	112175530	112175530	Frame_Shift_Del	DEL	G	G	-	c.4240delG	p.Val1414Ter	p.V1414*	ENST00000457016	16/16	4619/11025	4239/8532	1413/2843	M/X	atG/at
DC_A	TCGA.DM.A28M.01	colorectal	APC	GRCh37	5	112174119	112174119	Nonsense_Mutation	SNP	C	C	A	c.2828C>A	p.Ser943Ter	p.S943*	ENST00000457016	16/16	3208/11025	2828/8532	943/2843	S/*	tCa/tAa
DC_A	TCGA.DY.A0XA.01	colorectal	APC	GRCh37	5	112175213	112175213	Nonsense_Mutation	SNP	A	A	T	c.3922A>T	p.Lys1308Ter	p.K1308*	ENST00000457016	16/16	4302/11025	3922/8532	1308/2843	K/*	Aaa/Taa
DC_A	TCGA.DY.A1DC.01	colorectal	APC	GRCh37	5	112175576	112175576	Nonsense_Mutation	SNP	C	C	T	c.4285C>T	p.Gln1429Ter	p.Q1429*	ENST00000457016	16/16	4665/11025	4285/8532	1429/2843	Q/*	Caa/Taa
DC_A	TCGA.DY.A1DD.01	colorectal	APC	GRCh37	5	112175322	112175322	Frame_Shift_Del	DEL	C	C	-	c.4031delC	p.Ser1344Ter	p.S1344*	ENST00000457016	16/16	4411/11025	4031/8532	1344/2843	S/X	tCa/ta
DC_A	TCGA.DY.A1DF.01	colorectal	APC	GRCh37	5	112175931	112175931	Frame_Shift_Del	DEL	A	A	-	c.4643delA	p.Asn1548ThrfsTer17	p.N1548Tfs*17	ENST00000457016	16/16	5020/11025	4640/8532	1547/2843	E/X	gAa/ga
DC_A	TCGA.DY.A1DG.01	colorectal	APC	GRCh37	5	112116592	112116592	Nonsense_Mutation	SNP	C	C	T	c.637C>T	p.Arg213Ter	p.R213*	ENST00000457016	6/16	1017/11025	637/8532	213/2843	R/*	Cga/Tga
DC_A	TCGA.DY.A1H8.01	colorectal	APC	GRCh37	5	112175303	112175303	Nonsense_Mutation	SNP	C	C	T	c.4012C>T	p.Gln1338Ter	p.Q1338*	ENST00000457016	16/16	4392/11025	4012/8532	1338/2843	Q/*	Cag/Tag
DC_A	TCGA.EF.5830.01	colorectal	APC	GRCh37	5	112175148	112175148	Frame_Shift_Del	DEL	A	A	-	c.3859delA	p.Ile1287Ter	p.I1287*	ENST00000457016	16/16	4237/11025	3857/8532	1286/2843	E/X	gAa/ga
DC_A	TCGA.EI.6506.01	colorectal	APC	GRCh37	5	112175136	112175136	Nonsense_Mutation	SNP	C	C	A	c.3845C>A	p.Ser1282Ter	p.S1282*	ENST00000457016	16/16	4225/11025	3845/8532	1282/2843	S/*	tCa/tAa
DC_A	TCGA.EI.6508.01	colorectal	APC	GRCh37	5	112174631	112174631	Nonsense_Mutation	SNP	C	C	T	c.3340C>T	p.Arg1114Ter	p.R1114*	ENST00000457016	16/16	3720/11025	3340/8532	1114/2843	R/*	Cga/Tga
DC_A	TCGA.EI.6508.01	colorectal	APC	GRCh37	5	112175216	112175216	Nonsense_Mutation	SNP	G	G	T	c.3925G>T	p.Glu1309Ter	p.E1309*	ENST00000457016	16/16	4305/11025	3925/8532	1309/2843	E/*	Gaa/Taa
DC_A	TCGA.EI.6509.01	colorectal	APC	GRCh37	5	112128143	112128143	Nonsense_Mutation	SNP	C	C	T	c.646C>T	p.Arg216Ter	p.R216*	ENST00000457016	7/16	1026/11025	646/8532	216/2843	R/*	Cga/Tga
DC_A	TCGA.EI.6511.01	colorectal	APC	GRCh37	5	112175358	112175358	Frame_Shift_Del	DEL	C	C	-	c.4067delC	p.Ser1356Ter	p.S1356*	ENST00000457016	16/16	4447/11025	4067/8532	1356/2843	S/X	tCa/ta
DC_A	TCGA.EI.6512.01	colorectal	APC	GRCh37	5	112176000	112176000	Frame_Shift_Del	DEL	A	A	-	c.4709delA	p.Asp1570ValfsTer6	p.D1570Vfs*6	ENST00000457016	16/16	5089/11025	4709/8532	1570/2843	D/X	gAt/gt
DC_A	TCGA.EI.6512.01	colorectal	APC	GRCh37	5	112173560	112173560	Nonsense_Mutation	SNP	C	C	T	c.2269C>T	p.Gln757Ter	p.Q757*	ENST00000457016	16/16	2649/11025	2269/8532	757/2843	Q/*	Caa/Taa
DC_A	TCGA.EI.6514.01	colorectal	APC	GRCh37	5	112174682	112174682	Nonsense_Mutation	SNP	C	C	T	c.3391C>T	p.Gln1131Ter	p.Q1131*	ENST00000457016	16/16	3771/11025	3391/8532	1131/2843	Q/*	Caa/Taa
DC_A	TCGA.EI.6514.01	colorectal	APC	GRCh37	5	112175225	112175225	Nonsense_Mutation	SNP	G	G	T	c.3934G>T	p.Gly1312Ter	p.G1312*	ENST00000457016	16/16	4314/11025	3934/8532	1312/2843	G/*	Gga/Tga
DC_A	TCGA.EI.6881.01	colorectal	APC	GRCh37	5	112173917	112173917	Nonsense_Mutation	SNP	C	C	T	c.2626C>T	p.Arg876Ter	p.R876*	ENST00000457016	16/16	3006/11025	2626/8532	876/2843	R/*	Cga/Tga
DC_A	TCGA.EI.6881.01	colorectal	APC	GRCh37	5	112175772	112175772	Frame_Shift_Del	DEL	A	A	-	c.4483delA	p.Ser1495ValfsTer12	p.S1495Vfs*12	ENST00000457016	16/16	4861/11025	4481/8532	1494/2843	E/X	gAa/ga
DC_A	TCGA.EI.6882.01	colorectal	APC	GRCh37	5	112173917	112173917	Nonsense_Mutation	SNP	C	C	T	c.2626C>T	p.Arg876Ter	p.R876*	ENST00000457016	16/16	3006/11025	2626/8532	876/2843	R/*	Cga/Tga
DC_A	TCGA.EI.6882.01	colorectal	APC	GRCh37	5	112175760	112175761	Frame_Shift_Ins	INS	-	-	T	c.4473dupT	p.Ala1492CysfsTer22	p.A1492Cfs*22	ENST00000457016	16/16	4849-4850/11025	4469-4470/8532	1490/2843	H/HX	cat/caTt
DC_A	TCGA.EI.6883.01	colorectal	APC	GRCh37	5	112175423	112175423	Nonsense_Mutation	SNP	C	C	T	c.4132C>T	p.Gln1378Ter	p.Q1378*	ENST00000457016	16/16	4512/11025	4132/8532	1378/2843	Q/*	Cag/Tag
DC_A	TCGA.EI.6883.01	colorectal	APC	GRCh37	5	112116592	112116592	Nonsense_Mutation	SNP	C	C	T	c.637C>T	p.Arg213Ter	p.R213*	ENST00000457016	6/16	1017/11025	637/8532	213/2843	R/*	Cga/Tga
DC_A	TCGA.EI.6884.01	colorectal	APC	GRCh37	5	112176027	112176030	Frame_Shift_Del	DEL	TTAT	TTAT	-	c.4738_4741delATTT	p.Ile1580LeufsTer69	p.I1580Lfs*69	ENST00000457016	16/16	5116-5119/11025	4736-4739/8532	1579-1580/2843	II/X	aTTATt/at
DC_A	TCGA.EI.6884.01	colorectal	APC	GRCh37	5	112174481	112174481	Nonsense_Mutation	SNP	G	G	T	c.3190G>T	p.Glu1064Ter	p.E1064*	ENST00000457016	16/16	3570/11025	3190/8532	1064/2843	E/*	Gag/Tag
DC_A	TCGA.EI.6885.01	colorectal	APC	GRCh37	5	112164616	112164616	Nonsense_Mutation	SNP	C	C	T	c.1690C>T	p.Arg564Ter	p.R564*	ENST00000457016	14/16	2070/11025	1690/8532	564/2843	R/*	Cga/Tga
DC_A	TCGA.EI.6917.01	colorectal	APC	GRCh37	5	112174631	112174631	Nonsense_Mutation	SNP	C	C	T	c.3340C>T	p.Arg1114Ter	p.R1114*	ENST00000457016	16/16	3720/11025	3340/8532	1114/2843	R/*	Cga/Tga
DC_A	TCGA.EI.6917.01	colorectal	APC	GRCh37	5	112175754	112175754	Nonsense_Mutation	SNP	T	T	G	c.4463T>G	p.Leu1488Ter	p.L1488*	ENST00000457016	16/16	4843/11025	4463/8532	1488/2843	L/*	tTa/tGa
DC_A	TCGA.EI.7002.01	colorectal	APC	GRCh37	5	112116592	112116592	Nonsense_Mutation	SNP	C	C	T	c.637C>T	p.Arg213Ter	p.R213*	ENST00000457016	6/16	1017/11025	637/8532	213/2843	R/*	Cga/Tga
DC_A	TCGA.EI.7002.01	colorectal	APC	GRCh37	5	112175766	112175766	Frame_Shift_Del	DEL	C	C	-	c.4476delC	p.Thr1493ArgfsTer14	p.T1493Rfs*14	ENST00000457016	16/16	4855/11025	4475/8532	1492/2843	A/X	gCc/gc
DC_A	TCGA.EI.7004.01	colorectal	RNF43	GRCh37	17	56492812	56492812	Frame_Shift_Del	DEL	C	C	-	c.127delG	p.Glu43AsnfsTer8	p.E43Nfs*8	ENST00000584437	1/9	2083/5575	127/2352	43/783	E/X	Gaa/aa
DC_A	TCGA.F4.6460.01	colorectal	APC	GRCh37	5	112175423	112175423	Nonsense_Mutation	SNP	C	C	T	c.4132C>T	p.Gln1378Ter	p.Q1378*	ENST00000457016	16/16	4512/11025	4132/8532	1378/2843	Q/*	Cag/Tag
DC_A	TCGA.F4.6461.01	colorectal	APC	GRCh37	5	112175576	112175576	Nonsense_Mutation	SNP	C	C	T	c.4285C>T	p.Gln1429Ter	p.Q1429*	ENST00000457016	16/16	4665/11025	4285/8532	1429/2843	Q/*	Caa/Taa
DC_A	TCGA.F4.6461.01	colorectal	APC	GRCh37	5	112174119	112174119	Nonsense_Mutation	SNP	C	C	A	c.2828C>A	p.Ser943Ter	p.S943*	ENST00000457016	16/16	3208/11025	2828/8532	943/2843	S/*	tCa/tAa
DC_A	TCGA.F4.6463.01	colorectal	APC	GRCh37	5	112175760	112175761	Frame_Shift_Ins	INS	-	-	T	c.4473dupT	p.Ala1492CysfsTer22	p.A1492Cfs*22	ENST00000457016	16/16	4849-4850/11025	4469-4470/8532	1490/2843	H/HX	cat/caTt
DC_A	TCGA.F4.6569.01	colorectal	APC	GRCh37	5	112175509	112175509	Frame_Shift_Del	DEL	G	G	-	c.4218delG	p.Ser1407ValfsTer8	p.S1407Vfs*8	ENST00000457016	16/16	4598/11025	4218/8532	1406/2843	Q/X	caG/ca
DC_A	TCGA.F4.6570.01	colorectal	RNF43	GRCh37	17	56435161	56435161	Frame_Shift_Del	DEL	C	C	-	c.1976delG	p.Gly659ValfsTer41	p.G659Vfs*41	ENST00000584437	8/9	3932/5575	1976/2352	659/783	G/X	gGt/gt
DC_A	TCGA.F4.6703.01	colorectal	CTNNB1	GRCh37	3	41266124	41266124	Missense_Mutation	SNP	A	A	G	c.121A>G	p.Thr41Ala	p.T41A	ENST00000349496	3/15	401/3729	121/2346	41/781	T/A	Acc/Gcc
DC_A	TCGA.F4.6806.01	colorectal	APC	GRCh37	5	112174096	112174096	Nonsense_Mutation	SNP	C	C	G	c.2805C>G	p.Tyr935Ter	p.Y935*	ENST00000457016	16/16	3185/11025	2805/8532	935/2843	Y/*	taC/taG
DC_A	TCGA.F4.6808.01	colorectal	APC	GRCh37	5	112175324	112175324	Nonsense_Mutation	SNP	G	G	T	c.4033G>T	p.Glu1345Ter	p.E1345*	ENST00000457016	16/16	4413/11025	4033/8532	1345/2843	E/*	Gaa/Taa
DC_A	TCGA.F4.6809.01	colorectal	APC	GRCh37	5	112174110	112174110	Nonsense_Mutation	SNP	C	C	A	c.2819C>A	p.Ser940Ter	p.S940*	ENST00000457016	16/16	3199/11025	2819/8532	940/2843	S/*	tCg/tAg
DC_A	TCGA.F4.6855.01	colorectal	APC	GRCh37	5	112175576	112175576	Nonsense_Mutation	SNP	C	C	T	c.4285C>T	p.Gln1429Ter	p.Q1429*	ENST00000457016	16/16	4665/11025	4285/8532	1429/2843	Q/*	Caa/Taa
DC_A	TCGA.F4.6855.01	colorectal	APC	GRCh37	5	112174096	112174096	Nonsense_Mutation	SNP	C	C	A	c.2805C>A	p.Tyr935Ter	p.Y935*	ENST00000457016	16/16	3185/11025	2805/8532	935/2843	Y/*	taC/taA
DC_A	TCGA.F4.6856.01	colorectal	RNF43	GRCh37	17	56448298	56448298	Frame_Shift_Del	DEL	G	G	-	c.349delC	p.Arg117AlafsTer41	p.R117Afs*41	ENST00000584437	2/9	2305/5575	349/2352	117/783	R/X	Cgc/gc
DC_A	TCGA.F5.6464.01	colorectal	APC	GRCh37	5	112175951	112175952	Frame_Shift_Ins	INS	-	-	A	c.4666dupA	p.Thr1556AsnfsTer3	p.T1556Nfs*3	ENST00000457016	16/16	5040-5041/11025	4660-4661/8532	1554/2843	E/EX	gaa/gAaa
DC_A	TCGA.F5.6465.01	colorectal	APC	GRCh37	5	112174784	112174784	Nonsense_Mutation	SNP	A	A	T	c.3493A>T	p.Lys1165Ter	p.K1165*	ENST00000457016	16/16	3873/11025	3493/8532	1165/2843	K/*	Aaa/Taa
DC_A	TCGA.F5.6465.01	colorectal	APC	GRCh37	5	112175207	112175207	Nonsense_Mutation	SNP	G	G	T	c.3916G>T	p.Glu1306Ter	p.E1306*	ENST00000457016	16/16	4296/11025	3916/8532	1306/2843	E/*	Gaa/Taa
DC_A	TCGA.F5.6571.01	colorectal	APC	GRCh37	5	112173917	112173917	Nonsense_Mutation	SNP	C	C	T	c.2626C>T	p.Arg876Ter	p.R876*	ENST00000457016	16/16	3006/11025	2626/8532	876/2843	R/*	Cga/Tga
DC_A	TCGA.F5.6571.01	colorectal	APC	GRCh37	5	112175772	112175772	Frame_Shift_Del	DEL	A	A	-	c.4483delA	p.Ser1495ValfsTer12	p.S1495Vfs*12	ENST00000457016	16/16	4861/11025	4481/8532	1494/2843	E/X	gAa/ga
DC_A	TCGA.F5.6702.01	colorectal	APC	GRCh37	5	112175639	112175639	Nonsense_Mutation	SNP	C	C	T	c.4348C>T	p.Arg1450Ter	p.R1450*	ENST00000457016	16/16	4728/11025	4348/8532	1450/2843	R/*	Cga/Tga
DC_A	TCGA.F5.6812.01	colorectal	APC	GRCh37	5	112175303	112175303	Nonsense_Mutation	SNP	C	C	T	c.4012C>T	p.Gln1338Ter	p.Q1338*	ENST00000457016	16/16	4392/11025	4012/8532	1338/2843	Q/*	Cag/Tag
DC_A	TCGA.F5.6813.01	colorectal	APC	GRCh37	5	112175423	112175423	Nonsense_Mutation	SNP	C	C	T	c.4132C>T	p.Gln1378Ter	p.Q1378*	ENST00000457016	16/16	4512/11025	4132/8532	1378/2843	Q/*	Cag/Tag
DC_A	TCGA.F5.6814.01	colorectal	APC	GRCh37	5	112175490	112175490	Nonsense_Mutation	SNP	C	C	A	c.4199C>A	p.Ser1400Ter	p.S1400*	ENST00000457016	16/16	4579/11025	4199/8532	1400/2843	S/*	tCg/tAg
DC_A	TCGA.F5.6814.01	colorectal	APC	GRCh37	5	112174631	112174631	Nonsense_Mutation	SNP	C	C	T	c.3340C>T	p.Arg1114Ter	p.R1114*	ENST00000457016	16/16	3720/11025	3340/8532	1114/2843	R/*	Cga/Tga
DC_A	TCGA.F5.6814.01	colorectal	APC	GRCh37	5	112178000	112178000	Nonsense_Mutation	SNP	C	C	T	c.6709C>T	p.Arg2237Ter	p.R2237*	ENST00000457016	16/16	7089/11025	6709/8532	2237/2843	R/*	Cga/Tga
DC_A	TCGA.F5.6814.01	colorectal	APC	GRCh37	5	112177901	112177901	Nonsense_Mutation	SNP	C	C	T	c.6610C>T	p.Arg2204Ter	p.R2204*	ENST00000457016	16/16	6990/11025	6610/8532	2204/2843	R/*	Cga/Tga
DC_A	TCGA.F5.6861.01	colorectal	APC	GRCh37	5	112175423	112175423	Nonsense_Mutation	SNP	C	C	T	c.4132C>T	p.Gln1378Ter	p.Q1378*	ENST00000457016	16/16	4512/11025	4132/8532	1378/2843	Q/*	Cag/Tag
DC_A	TCGA.F5.6863.01	colorectal	APC	GRCh37	5	112175106	112175106	Nonsense_Mutation	SNP	C	C	G	c.3815C>G	p.Ser1272Ter	p.S1272*	ENST00000457016	16/16	4195/11025	3815/8532	1272/2843	S/*	tCa/tGa
DC_A	TCGA.F5.6864.01	colorectal	APC	GRCh37	5	112175390	112175390	Nonsense_Mutation	SNP	C	C	T	c.4099C>T	p.Gln1367Ter	p.Q1367*	ENST00000457016	16/16	4479/11025	4099/8532	1367/2843	Q/*	Cag/Tag
DC_A	TCGA.G4.6293.01	colorectal	APC	GRCh37	5	112173917	112173917	Nonsense_Mutation	SNP	C	C	T	c.2626C>T	p.Arg876Ter	p.R876*	ENST00000457016	16/16	3006/11025	2626/8532	876/2843	R/*	Cga/Tga
DC_A	TCGA.G4.6293.01	colorectal	APC	GRCh37	5	112175756	112175756	Frame_Shift_Del	DEL	T	T	-	c.4466delT	p.Leu1489TyrfsTer18	p.L1489Yfs*18	ENST00000457016	16/16	4845/11025	4465/8532	1489/2843	L/X	Tta/ta
DC_A	TCGA.G4.6294.01	colorectal	APC	GRCh37	5	112175507	112175507	Nonsense_Mutation	SNP	C	C	T	c.4216C>T	p.Gln1406Ter	p.Q1406*	ENST00000457016	16/16	4596/11025	4216/8532	1406/2843	Q/*	Cag/Tag
DC_A	TCGA.G4.6294.01	colorectal	APC	GRCh37	5	112174094	112174095	Nonsense_Mutation	INS	-	-	A	c.2804dupA	p.Tyr935Ter	p.Y935*	ENST00000457016	16/16	3183-3184/11025	2803-2804/8532	935/2843	Y/*	tac/tAac
DC_A	TCGA.G4.6295.01	colorectal	APC	GRCh37	5	112164626	112164627	Frame_Shift_Ins	INS	-	-	AAGTGTGA	c.1704_1711dupTGTGAAAG	p.Ala571ValfsTer2	p.A571Vfs*2	ENST00000457016	14/16	2080-2081/11025	1700-1701/8532	567/2843	G/GSVX	gga/ggAAGTGTGAa
DC_A	TCGA.G4.6295.01	colorectal	APC	GRCh37	5	112175676	112175679	Frame_Shift_Del	DEL	AGAG	AGAG	-	c.4391_4394delAGAG	p.Glu1464ValfsTer8	p.E1464Vfs*8	ENST00000457016	16/16	4765-4768/11025	4385-4388/8532	1462-1463/2843	KR/X	aAGAGa/aa
DC_A	TCGA.G4.6297.01	colorectal	APC	GRCh37	5	112175756	112175756	Frame_Shift_Del	DEL	T	T	-	c.4466delT	p.Leu1489TyrfsTer18	p.L1489Yfs*18	ENST00000457016	16/16	4845/11025	4465/8532	1489/2843	L/X	Tta/ta
DC_A	TCGA.G4.6297.01	colorectal	APC	GRCh37	5	112174475	112174475	Nonsense_Mutation	SNP	C	C	T	c.3184C>T	p.Gln1062Ter	p.Q1062*	ENST00000457016	16/16	3564/11025	3184/8532	1062/2843	Q/*	Caa/Taa
DC_A	TCGA.G4.6298.01	colorectal	APC	GRCh37	5	112175149	112175150	Frame_Shift_Ins	INS	-	-	AT	c.3860_3861dupTA	p.Gly1288Ter	p.G1288*	ENST00000457016	16/16	4238-4239/11025	3858-3859/8532	1286-1287/2843	-/X	-/AT
DC_A	TCGA.G4.6299.01	colorectal	RNF43	GRCh37	17	56437579	56437579	Frame_Shift_Del	DEL	G	G	-	c.883delC	p.His295IlefsTer124	p.H295Ifs*124	ENST00000584437	7/9	2839/5575	883/2352	295/783	H/X	Cat/at
DC_A	TCGA.G4.6302.01	colorectal	RNF43	GRCh37	17	56435161	56435161	Frame_Shift_Del	DEL	C	C	-	c.1976delG	p.Gly659ValfsTer41	p.G659Vfs*41	ENST00000584437	8/9	3932/5575	1976/2352	659/783	G/X	gGt/gt
DC_A	TCGA.G4.6303.01	colorectal	APC	GRCh37	5	112175423	112175423	Nonsense_Mutation	SNP	C	C	T	c.4132C>T	p.Gln1378Ter	p.Q1378*	ENST00000457016	16/16	4512/11025	4132/8532	1378/2843	Q/*	Cag/Tag
DC_A	TCGA.G4.6306.01	colorectal	APC	GRCh37	5	112175639	112175639	Nonsense_Mutation	SNP	C	C	T	c.4348C>T	p.Arg1450Ter	p.R1450*	ENST00000457016	16/16	4728/11025	4348/8532	1450/2843	R/*	Cga/Tga
DC_A	TCGA.G4.6306.01	colorectal	APC	GRCh37	5	112173917	112173917	Nonsense_Mutation	SNP	C	C	T	c.2626C>T	p.Arg876Ter	p.R876*	ENST00000457016	16/16	3006/11025	2626/8532	876/2843	R/*	Cga/Tga
DC_A	TCGA.G4.6307.01	colorectal	APC	GRCh37	5	112174631	112174631	Nonsense_Mutation	SNP	C	C	T	c.3340C>T	p.Arg1114Ter	p.R1114*	ENST00000457016	16/16	3720/11025	3340/8532	1114/2843	R/*	Cga/Tga
DC_A	TCGA.G4.6309.01	colorectal	APC	GRCh37	5	112164586	112164586	Nonsense_Mutation	SNP	C	C	T	c.1660C>T	p.Arg554Ter	p.R554*	ENST00000457016	14/16	2040/11025	1660/8532	554/2843	R/*	Cga/Tga
DC_A	TCGA.G4.6309.01	colorectal	APC	GRCh37	5	112175676	112175677	Frame_Shift_Del	DEL	AG	AG	-	c.4393_4394delAG	p.Ser1465TrpfsTer3	p.S1465Wfs*3	ENST00000457016	16/16	4765-4766/11025	4385-4386/8532	1462/2843	K/X	aAG/a
DC_A	TCGA.G4.6311.01	colorectal	APC	GRCh37	5	112102031	112102032	Frame_Shift_Ins	INS	-	-	A	c.147dupA	p.Gln50ThrfsTer7	p.Q50Tfs*7	ENST00000457016	3/16	524-525/11025	144-145/8532	48-49/2843	-/X	-/A
DC_A	TCGA.G4.6311.01	colorectal	CTNNB1	GRCh37	3	41266124	41266124	Missense_Mutation	SNP	A	A	G	c.121A>G	p.Thr41Ala	p.T41A	ENST00000349496	3/15	401/3729	121/2346	41/781	T/A	Acc/Gcc
DC_A	TCGA.G4.6314.01	colorectal	APC	GRCh37	5	112116592	112116592	Nonsense_Mutation	SNP	C	C	T	c.637C>T	p.Arg213Ter	p.R213*	ENST00000457016	6/16	1017/11025	637/8532	213/2843	R/*	Cga/Tga
DC_A	TCGA.G4.6314.01	colorectal	APC	GRCh37	5	112175760	112175761	Frame_Shift_Ins	INS	-	-	T	c.4473dupT	p.Ala1492CysfsTer22	p.A1492Cfs*22	ENST00000457016	16/16	4849-4850/11025	4469-4470/8532	1490/2843	H/HX	cat/caTt
DC_A	TCGA.G4.6315.01	colorectal	APC	GRCh37	5	112128143	112128143	Nonsense_Mutation	SNP	C	C	T	c.646C>T	p.Arg216Ter	p.R216*	ENST00000457016	7/16	1026/11025	646/8532	216/2843	R/*	Cga/Tga
DC_A	TCGA.G4.6315.01	colorectal	APC	GRCh37	5	112175348	112175348	Nonsense_Mutation	SNP	G	G	T	c.4057G>T	p.Glu1353Ter	p.E1353*	ENST00000457016	16/16	4437/11025	4057/8532	1353/2843	E/*	Gaa/Taa
DC_A	TCGA.G4.6317.01	colorectal	APC	GRCh37	5	112175162	112175162	Nonsense_Mutation	SNP	C	C	T	c.3871C>T	p.Gln1291Ter	p.Q1291*	ENST00000457016	16/16	4251/11025	3871/8532	1291/2843	Q/*	Cag/Tag
DC_A	TCGA.G4.6317.01	colorectal	APC	GRCh37	5	112174920	112174921	Frame_Shift_Del	DEL	AT	AT	-	c.3631_3632delAT	p.Met1211ValfsTer5	p.M1211Vfs*5	ENST00000457016	16/16	4009-4010/11025	3629-3630/8532	1210/2843	H/X	cAT/c
DC_A	TCGA.G4.6320.01	colorectal	APC	GRCh37	5	112175596	112175596	Frame_Shift_Del	DEL	A	A	-	c.4306delA	p.Ser1436ValfsTer37	p.S1436Vfs*37	ENST00000457016	16/16	4685/11025	4305/8532	1435/2843	R/X	agA/ag
DC_A	TCGA.G4.6320.01	colorectal	APC	GRCh37	5	112174631	112174631	Nonsense_Mutation	SNP	C	C	T	c.3340C>T	p.Arg1114Ter	p.R1114*	ENST00000457016	16/16	3720/11025	3340/8532	1114/2843	R/*	Cga/Tga
DC_A	TCGA.G4.6322.01	colorectal	APC	GRCh37	5	112175358	112175358	Nonsense_Mutation	SNP	C	C	G	c.4067C>G	p.Ser1356Ter	p.S1356*	ENST00000457016	16/16	4447/11025	4067/8532	1356/2843	S/*	tCa/tGa
DC_A	TCGA.G4.6322.01	colorectal	APC	GRCh37	5	112174094	112174095	Nonsense_Mutation	INS	-	-	A	c.2804dupA	p.Tyr935Ter	p.Y935*	ENST00000457016	16/16	3183-3184/11025	2803-2804/8532	935/2843	Y/*	tac/tAac
DC_A	TCGA.G4.6323.01	colorectal	APC	GRCh37	5	112175675	112175676	Frame_Shift_Ins	INS	-	-	AG	c.4393_4394dupAG	p.Ser1465ArgfsTer9	p.S1465Rfs*9	ENST00000457016	16/16	4764-4765/11025	4384-4385/8532	1462/2843	K/KX	aag/aAGag
DC_A	TCGA.G4.6323.01	colorectal	APC	GRCh37	5	112170863	112170863	Splice_Site	SNP	G	G	A	c.1958+1G>A		p.X653_splice	ENST00000457016		-/11025	1958/8532	653/2843
DC_A	TCGA.G4.6586.01	colorectal	RNF43	GRCh37	17	56448298	56448298	Frame_Shift_Del	DEL	G	G	-	c.349delC	p.Arg117AlafsTer41	p.R117Afs*41	ENST00000584437	2/9	2305/5575	349/2352	117/783	R/X	Cgc/gc
DC_A	TCGA.G4.6588.01	colorectal	RNF43	GRCh37	17	56435161	56435161	Frame_Shift_Del	DEL	C	C	-	c.1976delG	p.Gly659ValfsTer41	p.G659Vfs*41	ENST00000584437	8/9	3932/5575	1976/2352	659/783	G/X	gGt/gt
DC_A	TCGA.G4.6625.01	colorectal	APC	GRCh37	5	112175271	112175271	Nonsense_Mutation	SNP	C	C	G	c.3980C>G	p.Ser1327Ter	p.S1327*	ENST00000457016	16/16	4360/11025	3980/8532	1327/2843	S/*	tCa/tGa
DC_A	TCGA.G4.6626.01	colorectal	APC	GRCh37	5	112128191	112128191	Nonsense_Mutation	SNP	C	C	T	c.694C>T	p.Arg232Ter	p.R232*	ENST00000457016	7/16	1074/11025	694/8532	232/2843	R/*	Cga/Tga
DC_A	TCGA.G4.6628.01	colorectal	RNF43	GRCh37	17	56435161	56435161	Frame_Shift_Del	DEL	C	C	-	c.1976delG	p.Gly659ValfsTer41	p.G659Vfs*41	ENST00000584437	8/9	3932/5575	1976/2352	659/783	G/X	gGt/gt
DC_A	TCGA.G5.6235.01	colorectal	APC	GRCh37	5	112174631	112174631	Nonsense_Mutation	SNP	C	C	T	c.3340C>T	p.Arg1114Ter	p.R1114*	ENST00000457016	16/16	3720/11025	3340/8532	1114/2843	R/*	Cga/Tga
DC_A	TCGA.G5.6235.01	colorectal	APC	GRCh37	5	112175348	112175348	Nonsense_Mutation	SNP	G	G	T	c.4057G>T	p.Glu1353Ter	p.E1353*	ENST00000457016	16/16	4437/11025	4057/8532	1353/2843	E/*	Gaa/Taa
DC_A	TCGA.G5.6572.01	colorectal	APC	GRCh37	5	112174784	112174784	Nonsense_Mutation	SNP	A	A	T	c.3493A>T	p.Lys1165Ter	p.K1165*	ENST00000457016	16/16	3873/11025	3493/8532	1165/2843	K/*	Aaa/Taa
DC_A	TCGA.G5.6641.01	colorectal	APC	GRCh37	5	112175752	112175752	Frame_Shift_Del	DEL	T	T	-	c.4463delT	p.Leu1488TyrfsTer19	p.L1488Yfs*19	ENST00000457016	16/16	4841/11025	4461/8532	1487/2843	T/X	acT/ac
Val_B	SC00573A	colorectal	RNF43	GRCh37	17	56435161	56435161	Frame_Shift_Del	DEL	C	C	-	c.1976delG	p.Gly659ValfsTer41	p.G659Vfs*41	ENST00000584437	8/9	3932/5575	1976/2352	659/783	G/X	gGt/gt
Val_B	SC00582A	colorectal	RNF43	GRCh37	17	56436128	56436128	Nonsense_Mutation	SNP	G	G	A	c.1009C>T	p.Arg337Ter	p.R337*	ENST00000584437	8/9	2965/5575	1009/2352	337/783	R/*	Cga/Tga
Val_B	SC00989A	colorectal	RNF43	GRCh37	17	56440643	56440643	Frame_Shift_Del	DEL	G	G	-	c.575delC	p.Pro192ArgfsTer11	p.P192Rfs*11	ENST00000584437	4/9	2531/5575	575/2352	192/783	P/X	cCg/cg
Val_B	SC01001A	colorectal	RNF43	GRCh37	17	56435582	56435582	Nonsense_Mutation	SNP	G	G	A	c.1555C>T	p.Arg519Ter	p.R519*	ENST00000584437	8/9	3511/5575	1555/2352	519/783	R/*	Cga/Tga
Val_B	SC01001A	colorectal	RNF43	GRCh37	17	56439992	56439992	Nonsense_Mutation	SNP	C	C	T	c.600G>A	p.Trp200Ter	p.W200*	ENST00000584437	5/9	2556/5575	600/2352	200/783	W/*	tgG/tgA
Val_B	SC01001A	colorectal	RNF43	GRCh37	17	56435161	56435161	Frame_Shift_Del	DEL	C	C	-	c.1976delG	p.Gly659ValfsTer41	p.G659Vfs*41	ENST00000584437	8/9	3932/5575	1976/2352	659/783	G/X	gGt/gt
Val_B	SC01297A	colorectal	RNF43	GRCh37	17	56448319	56448319	Nonsense_Mutation	SNP	C	C	A	c.328G>T	p.Glu110Ter	p.E110*	ENST00000584437	2/9	2284/5575	328/2352	110/783	E/*	Gag/Tag
Val_B	SC00553A	colorectal	APC	GRCh37	5	112175169	112175169	Frame_Shift_Del	DEL	C	C	-	c.3878delC	p.Thr1293AsnfsTer12	p.T1293Nfs*12	ENST00000457016	16/16	4258/11025	3878/8532	1293/2843	T/X	aCa/aa
Val_B	SC00554A	colorectal	APC	GRCh37	5	112175457	112175457	Frame_Shift_Del	DEL	C	C	-	c.4166delC	p.Ser1389LeufsTer26	p.S1389Lfs*26	ENST00000457016	16/16	4546/11025	4166/8532	1389/2843	S/X	tCt/tt
Val_B	SC00554A	colorectal	APC	GRCh37	5	112175753	112175754	Frame_Shift_Ins	INS	-	-	TA	c.4464_4465dupAT	p.Leu1489TyrfsTer19	p.L1489Yfs*19	ENST00000457016	16/16	4842-4843/11025	4462-4463/8532	1488/2843	L/LX	tta/tTAta
Val_B	SC00557A	colorectal	APC	GRCh37	5	112175147	112175147	Nonsense_Mutation	SNP	G	G	T	c.3856G>T	p.Glu1286Ter	p.E1286*	ENST00000457016	16/16	4236/11025	3856/8532	1286/2843	E/*	Gaa/Taa
Val_B	SC00558A	colorectal	APC	GRCh37	5	112173690	112173690	Frame_Shift_Del	DEL	T	T	-	c.2403delT	p.Phe801LeufsTer19	p.F801Lfs*19	ENST00000457016	16/16	2779/11025	2399/8532	800/2843	V/X	gTt/gt
Val_B	SC00558A	colorectal	APC	GRCh37	5	112175763	112175764	Frame_Shift_Ins	INS	-	-	A	c.4472_4473insA	p.Phe1491LeufsTer23	p.F1491Lfs*23	ENST00000457016	16/16	4852-4853/11025	4472-4473/8532	1491/2843	F/LX	ttt/ttAt
Val_B	SC00559A	colorectal	APC	GRCh37	5	112174631	112174631	Nonsense_Mutation	SNP	C	C	T	c.3340C>T	p.Arg1114Ter	p.R1114*	ENST00000457016	16/16	3720/11025	3340/8532	1114/2843	R/*	Cga/Tga
Val_B	SC00560A	colorectal	APC	GRCh37	5	112162891	112162891	Nonsense_Mutation	SNP	C	C	T	c.1495C>T	p.Arg499Ter	p.R499*	ENST00000457016	12/16	1875/11025	1495/8532	499/2843	R/*	Cga/Tga
Val_B	SC00560A	colorectal	APC	GRCh37	5	112175411	112175411	Nonsense_Mutation	SNP	G	G	T	c.4120G>T	p.Glu1374Ter	p.E1374*	ENST00000457016	16/16	4500/11025	4120/8532	1374/2843	E/*	Gaa/Taa
Val_B	SC00562A	colorectal	APC	GRCh37	5	112173260	112173261	Frame_Shift_Del	DEL	AG	AG	-	c.1974_1975delGA	p.Asn659GlnfsTer14	p.N659Qfs*14	ENST00000457016	16/16	2349-2350/11025	1969-1970/8532	657/2843	R/X	AGa/a
Val_B	SC00567A	colorectal	APC	GRCh37	5	112136975	112136975	Splice_Site	SNP	G	G	A	c.730-1G>A		p.X244_splice	ENST00000457016		-/11025	730/8532	244/2843
Val_B	SC00567A	colorectal	APC	GRCh37	5	112175390	112175390	Nonsense_Mutation	SNP	C	C	T	c.4099C>T	p.Gln1367Ter	p.Q1367*	ENST00000457016	16/16	4479/11025	4099/8532	1367/2843	Q/*	Cag/Tag
Val_B	SC00569A	colorectal	APC	GRCh37	5	112174241	112174241	Nonsense_Mutation	SNP	G	G	T	c.2950G>T	p.Glu984Ter	p.E984*	ENST00000457016	16/16	3330/11025	2950/8532	984/2843	E/*	Gaa/Taa
Val_B	SC00569A	colorectal	APC	GRCh37	5	112176017	112176017	Nonsense_Mutation	SNP	G	G	T	c.4726G>T	p.Glu1576Ter	p.E1576*	ENST00000457016	16/16	5106/11025	4726/8532	1576/2843	E/*	Gaa/Taa
Val_B	SC00571A	colorectal	APC	GRCh37	5	112175351	112175352	Frame_Shift_Del	DEL	TT	TT	-	c.4062_4063delTT	p.Ser1355PhefsTer19	p.S1355Ffs*19	ENST00000457016	16/16	4440-4441/11025	4060-4061/8532	1354/2843	F/X	TTt/t
Val_B	SC00572A	colorectal	APC	GRCh37	5	112175328	112175328	Nonsense_Mutation	SNP	C	C	G	c.4037C>G	p.Ser1346Ter	p.S1346*	ENST00000457016	16/16	4417/11025	4037/8532	1346/2843	S/*	tCa/tGa
Val_B	SC00573A	colorectal	APC	GRCh37	5	112102932	112102932	Frame_Shift_Del	DEL	A	A	-	c.271delA	p.Met91CysfsTer34	p.M91Cfs*34	ENST00000457016	4/16	647/11025	267/8532	89/2843	S/X	tcA/tc
Val_B	SC00574A	colorectal	APC	GRCh37	5	112151204	112151204	Nonsense_Mutation	SNP	C	C	T	c.847C>T	p.Arg283Ter	p.R283*	ENST00000457016	9/16	1227/11025	847/8532	283/2843	R/*	Cga/Tga
Val_B	SC00574A	colorectal	APC	GRCh37	5	112175207	112175207	Nonsense_Mutation	SNP	G	G	T	c.3916G>T	p.Glu1306Ter	p.E1306*	ENST00000457016	16/16	4296/11025	3916/8532	1306/2843	E/*	Gaa/Taa
Val_B	SC00577A	colorectal	APC	GRCh37	5	112175313	112175314	Frame_Shift_Ins	INS	-	-	T	c.4025dupT	p.Leu1342PhefsTer12	p.L1342Ffs*12	ENST00000457016	16/16	4402-4403/11025	4022-4023/8532	1341/2843	S/SX	agt/agTt
Val_B	SC00578A	colorectal	APC	GRCh37	5	112175490	112175490	Nonsense_Mutation	SNP	C	C	A	c.4199C>A	p.Ser1400Ter	p.S1400*	ENST00000457016	16/16	4579/11025	4199/8532	1400/2843	S/*	tCg/tAg
Val_B	SC00581A	colorectal	APC	GRCh37	5	112173801	112173801	Nonsense_Mutation	SNP	C	C	A	c.2510C>A	p.Ser837Ter	p.S837*	ENST00000457016	16/16	2890/11025	2510/8532	837/2843	S/*	tCa/tAa
Val_B	SC00581A	colorectal	APC	GRCh37	5	112175181	112175182	Frame_Shift_Ins	INS	-	-	T	c.3892dupT	p.Ser1298PhefsTer3	p.S1298Ffs*3	ENST00000457016	16/16	4270-4271/11025	3890-3891/8532	1297/2843	D/DX	gat/gaTt
Val_B	SC00582A	colorectal	APC	GRCh37	5	112175348	112175348	Nonsense_Mutation	SNP	G	G	T	c.4057G>T	p.Glu1353Ter	p.E1353*	ENST00000457016	16/16	4437/11025	4057/8532	1353/2843	E/*	Gaa/Taa
Val_B	SC00582A	colorectal	APC	GRCh37	5	112179146	112179146	Nonsense_Mutation	SNP	G	G	T	c.7855G>T	p.Glu2619Ter	p.E2619*	ENST00000457016	16/16	8235/11025	7855/8532	2619/2843	E/*	Gaa/Taa
Val_B	SC00583A	colorectal	APC	GRCh37	5	112173830	112173831	Frame_Shift_Ins	INS	-	-	A	c.2544dupA	p.Asp849ArgfsTer2	p.D849Rfs*2	ENST00000457016	16/16	2919-2920/11025	2539-2540/8532	847/2843	E/EX	gaa/gAaa
Val_B	SC00584A	colorectal	APC	GRCh37	5	112173917	112173917	Nonsense_Mutation	SNP	C	C	T	c.2626C>T	p.Arg876Ter	p.R876*	ENST00000457016	16/16	3006/11025	2626/8532	876/2843	R/*	Cga/Tga
Val_B	SC00584A	colorectal	APC	GRCh37	5	112175756	112175756	Frame_Shift_Del	DEL	T	T	-	c.4466delT	p.Leu1489TyrfsTer18	p.L1489Yfs*18	ENST00000457016	16/16	4845/11025	4465/8532	1489/2843	L/X	Tta/ta
Val_B	SC00585A	colorectal	APC	GRCh37	5	112162891	112162891	Nonsense_Mutation	SNP	C	C	T	c.1495C>T	p.Arg499Ter	p.R499*	ENST00000457016	12/16	1875/11025	1495/8532	499/2843	R/*	Cga/Tga
Val_B	SC00585A	colorectal	APC	GRCh37	5	112128143	112128143	Nonsense_Mutation	SNP	C	C	T	c.646C>T	p.Arg216Ter	p.R216*	ENST00000457016	7/16	1026/11025	646/8532	216/2843	R/*	Cga/Tga
Val_B	SC00587A	colorectal	APC	GRCh37	5	112175447	112175447	Nonsense_Mutation	SNP	A	A	T	c.4156A>T	p.Arg1386Ter	p.R1386*	ENST00000457016	16/16	4536/11025	4156/8532	1386/2843	R/*	Aga/Tga
Val_B	SC00589A	colorectal	APC	GRCh37	5	112174835	112174835	Nonsense_Mutation	SNP	A	A	T	c.3544A>T	p.Lys1182Ter	p.K1182*	ENST00000457016	16/16	3924/11025	3544/8532	1182/2843	K/*	Aaa/Taa
Val_B	SC00589A	colorectal	APC	GRCh37	5	112175457	112175458	Frame_Shift_Ins	INS	-	-	T	c.4167dupT	p.Val1390CysfsTer5	p.V1390Cfs*5	ENST00000457016	16/16	4546-4547/11025	4166-4167/8532	1389/2843	S/SX	tct/tcTt
Val_B	SC00590A	colorectal	APC	GRCh37	5	112173597	112173597	Nonsense_Mutation	SNP	T	T	A	c.2306T>A	p.Leu769Ter	p.L769*	ENST00000457016	16/16	2686/11025	2306/8532	769/2843	L/*	tTa/tAa
Val_B	SC00590A	colorectal	APC	GRCh37	5	112175760	112175761	Frame_Shift_Ins	INS	-	-	T	c.4473dupT	p.Ala1492CysfsTer22	p.A1492Cfs*22	ENST00000457016	16/16	4849-4850/11025	4469-4470/8532	1490/2843	H/HX	cat/caTt
Val_B	SC00591A	colorectal	APC	GRCh37	5	112173790	112173800	Frame_Shift_Del	DEL	CTCCTCTTCAT	CTCCTCTTCAT	-	c.2500_2510delTCCTCTTCATC	p.Ser834LysfsTer6	p.S834Kfs*6	ENST00000457016	16/16	2879-2889/11025	2499-2509/8532	833-837/2843	SSSSS/SX	agCTCCTCTTCATca/agca
Val_B	SC00591A	colorectal	APC	GRCh37	5	112174567	112174567	Frame_Shift_Del	DEL	T	T	-	c.3279delT	p.Phe1093LeufsTer33	p.F1093Lfs*33	ENST00000457016	16/16	3656/11025	3276/8532	1092/2843	H/X	caT/ca
Val_B	SC00591A	colorectal	APC	GRCh37	5	112175752	112175752	Frame_Shift_Del	DEL	T	T	-	c.4463delT	p.Leu1488TyrfsTer19	p.L1488Yfs*19	ENST00000457016	16/16	4841/11025	4461/8532	1487/2843	T/X	acT/ac
Val_B	SC00592A	colorectal	APC	GRCh37	5	112173704	112173704	Nonsense_Mutation	SNP	C	C	T	c.2413C>T	p.Arg805Ter	p.R805*	ENST00000457016	16/16	2793/11025	2413/8532	805/2843	R/*	Cga/Tga
Val_B	SC00595A	colorectal	APC	GRCh37	5	112128141	112128141	Splice_Site	SNP	A	A	G	c.646-2A>G		p.X216_splice	ENST00000457016		-/11025	646/8532	216/2843
Val_B	SC00595A	colorectal	APC	GRCh37	5	112174386	112174386	Nonsense_Mutation	SNP	C	C	G	c.3095C>G	p.Ser1032Ter	p.S1032*	ENST00000457016	16/16	3475/11025	3095/8532	1032/2843	S/*	tCa/tGa
Val_B	SC00596A	colorectal	APC	GRCh37	5	112175273	112175273	Nonsense_Mutation	SNP	C	C	T	c.3982C>T	p.Gln1328Ter	p.Q1328*	ENST00000457016	16/16	4362/11025	3982/8532	1328/2843	Q/*	Cag/Tag
Val_B	SC00597A	colorectal	APC	GRCh37	5	112175133	112175133	Nonsense_Mutation	SNP	C	C	A	c.3842C>A	p.Ser1281Ter	p.S1281*	ENST00000457016	16/16	4222/11025	3842/8532	1281/2843	S/*	tCa/tAa
Val_B	SC00598A	colorectal	APC	GRCh37	5	112175351	112175352	Frame_Shift_Del	DEL	TT	TT	-	c.4062_4063delTT	p.Ser1355PhefsTer19	p.S1355Ffs*19	ENST00000457016	16/16	4440-4441/11025	4060-4061/8532	1354/2843	F/X	TTt/t
Val_B	SC00598A	colorectal	APC	GRCh37	5	112175255	112175255	Frame_Shift_Del	DEL	G	G	-	c.3964delG	p.Glu1322LysfsTer93	p.E1322Kfs*93	ENST00000457016	16/16	4344/11025	3964/8532	1322/2843	E/X	Gaa/aa
Val_B	SC00956A	colorectal	APC	GRCh37	5	112175212	112175216	Frame_Shift_Del	DEL	AAAAG	AAAAG	-	c.3927_3931delAAAGA	p.Glu1309AspfsTer4	p.E1309Dfs*4	ENST00000457016	16/16	4301-4305/11025	3921-3925/8532	1307-1309/2843	IKE/IX	atAAAAGaa/ataa
Val_B	SC00957A	colorectal	APC	GRCh37	5	112164616	112164616	Nonsense_Mutation	SNP	C	C	T	c.1690C>T	p.Arg564Ter	p.R564*	ENST00000457016	14/16	2070/11025	1690/8532	564/2843	R/*	Cga/Tga
Val_B	SC00957A	colorectal	APC	GRCh37	5	112175360	112175360	Nonsense_Mutation	SNP	G	G	T	c.4069G>T	p.Gly1357Ter	p.G1357*	ENST00000457016	16/16	4449/11025	4069/8532	1357/2843	G/*	Gga/Tga
Val_B	SC00958A	colorectal	APC	GRCh37	5	112173917	112173917	Nonsense_Mutation	SNP	C	C	T	c.2626C>T	p.Arg876Ter	p.R876*	ENST00000457016	16/16	3006/11025	2626/8532	876/2843	R/*	Cga/Tga
Val_B	SC00959A	colorectal	APC	GRCh37	5	112175273	112175273	Nonsense_Mutation	SNP	C	C	T	c.3982C>T	p.Gln1328Ter	p.Q1328*	ENST00000457016	16/16	4362/11025	3982/8532	1328/2843	Q/*	Cag/Tag
Val_B	SC00959A	colorectal	APC	GRCh37	5	112173517	112173518	Frame_Shift_Del	DEL	TA	TA	-	c.2227_2228delAT	p.Met743ValfsTer12	p.M743Vfs*12	ENST00000457016	16/16	2606-2607/11025	2226-2227/8532	742-743/2843	IM/IX	atTAtg/attg
Val_B	SC00960A	colorectal	APC	GRCh37	5	112175324	112175324	Nonsense_Mutation	SNP	G	G	T	c.4033G>T	p.Glu1345Ter	p.E1345*	ENST00000457016	16/16	4413/11025	4033/8532	1345/2843	E/*	Gaa/Taa
Val_B	SC00961A	colorectal	APC	GRCh37	5	112175480	112175480	Nonsense_Mutation	SNP	G	G	T	c.4189G>T	p.Glu1397Ter	p.E1397*	ENST00000457016	16/16	4569/11025	4189/8532	1397/2843	E/*	Gag/Tag
Val_B	SC00961A	colorectal	APC	GRCh37	5	112174635	112174635	Frame_Shift_Del	DEL	T	T	-	c.3344delT	p.Val1115GlyfsTer11	p.V1115Gfs*11	ENST00000457016	16/16	3724/11025	3344/8532	1115/2843	V/X	gTg/gg
Val_B	SC00962A	colorectal	APC	GRCh37	5	112128191	112128191	Nonsense_Mutation	SNP	C	C	T	c.694C>T	p.Arg232Ter	p.R232*	ENST00000457016	7/16	1074/11025	694/8532	232/2843	R/*	Cga/Tga
Val_B	SC00962A	colorectal	APC	GRCh37	5	112175951	112175952	Frame_Shift_Ins	INS	-	-	A	c.4666dupA	p.Thr1556AsnfsTer3	p.T1556Nfs*3	ENST00000457016	16/16	5040-5041/11025	4660-4661/8532	1554/2843	E/EX	gaa/gAaa
Val_B	SC00963A	colorectal	APC	GRCh37	5	112175213	112175213	Nonsense_Mutation	SNP	A	A	T	c.3922A>T	p.Lys1308Ter	p.K1308*	ENST00000457016	16/16	4302/11025	3922/8532	1308/2843	K/*	Aaa/Taa
Val_B	SC00964A	colorectal	APC	GRCh37	5	112175480	112175480	Nonsense_Mutation	SNP	G	G	T	c.4189G>T	p.Glu1397Ter	p.E1397*	ENST00000457016	16/16	4569/11025	4189/8532	1397/2843	E/*	Gag/Tag
Val_B	SC00964A	colorectal	APC	GRCh37	5	112173384	112173385	Frame_Shift_Ins	INS	-	-	ATGGGAC	c.2099_2105dupACATGGG	p.Ala703HisfsTer5	p.A703Hfs*5	ENST00000457016	16/16	2473-2474/11025	2093-2094/8532	698/2843	L/LWDX	tta/ttATGGGACa
Val_B	SC00966A	colorectal	APC	GRCh37	5	112175181	112175182	Frame_Shift_Ins	INS	-	-	T	c.3892dupT	p.Ser1298PhefsTer3	p.S1298Ffs*3	ENST00000457016	16/16	4270-4271/11025	3890-3891/8532	1297/2843	D/DX	gat/gaTt
Val_B	SC00967A	colorectal	APC	GRCh37	5	112173917	112173917	Nonsense_Mutation	SNP	C	C	T	c.2626C>T	p.Arg876Ter	p.R876*	ENST00000457016	16/16	3006/11025	2626/8532	876/2843	R/*	Cga/Tga
Val_B	SC00967A	colorectal	APC	GRCh37	5	112175507	112175507	Nonsense_Mutation	SNP	C	C	T	c.4216C>T	p.Gln1406Ter	p.Q1406*	ENST00000457016	16/16	4596/11025	4216/8532	1406/2843	Q/*	Cag/Tag
Val_B	SC00968A	colorectal	APC	GRCh37	5	112173917	112173917	Nonsense_Mutation	SNP	C	C	T	c.2626C>T	p.Arg876Ter	p.R876*	ENST00000457016	16/16	3006/11025	2626/8532	876/2843	R/*	Cga/Tga
Val_B	SC00968A	colorectal	APC	GRCh37	5	112175951	112175952	Frame_Shift_Ins	INS	-	-	A	c.4666dupA	p.Thr1556AsnfsTer3	p.T1556Nfs*3	ENST00000457016	16/16	5040-5041/11025	4660-4661/8532	1554/2843	E/EX	gaa/gAaa
Val_B	SC00969A	colorectal	APC	GRCh37	5	112128143	112128143	Nonsense_Mutation	SNP	C	C	T	c.646C>T	p.Arg216Ter	p.R216*	ENST00000457016	7/16	1026/11025	646/8532	216/2843	R/*	Cga/Tga
Val_B	SC00969A	colorectal	APC	GRCh37	5	112175756	112175757	Frame_Shift_Ins	INS	-	-	TAAA	c.4467_4468insAATA	p.His1490AsnfsTer25	p.H1490Nfs*25	ENST00000457016	16/16	4845-4846/11025	4465-4466/8532	1489/2843	L/LNX	tta/tTAAAta
Val_B	SC00970A	colorectal	APC	GRCh37	5	112175390	112175390	Nonsense_Mutation	SNP	C	C	T	c.4099C>T	p.Gln1367Ter	p.Q1367*	ENST00000457016	16/16	4479/11025	4099/8532	1367/2843	Q/*	Cag/Tag
Val_B	SC00971A	colorectal	APC	GRCh37	5	112174119	112174119	Nonsense_Mutation	SNP	C	C	A	c.2828C>A	p.Ser943Ter	p.S943*	ENST00000457016	16/16	3208/11025	2828/8532	943/2843	S/*	tCa/tAa
Val_B	SC00971A	colorectal	APC	GRCh37	5	112175513	112175513	Nonsense_Mutation	SNP	G	G	T	c.4222G>T	p.Glu1408Ter	p.E1408*	ENST00000457016	16/16	4602/11025	4222/8532	1408/2843	E/*	Gaa/Taa
Val_B	SC00973A	colorectal	APC	GRCh37	5	112151261	112151261	Nonsense_Mutation	SNP	C	C	T	c.904C>T	p.Arg302Ter	p.R302*	ENST00000457016	9/16	1284/11025	904/8532	302/2843	R/*	Cga/Tga
Val_B	SC00973A	colorectal	APC	GRCh37	5	112175524	112175524	Frame_Shift_Del	DEL	T	T	-	c.4233delT	p.Ser1411ArgfsTer4	p.S1411Rfs*4	ENST00000457016	16/16	4613/11025	4233/8532	1411/2843	S/X	agT/ag
Val_B	SC00974A	colorectal	APC	GRCh37	5	112175594	112175594	Nonsense_Mutation	SNP	A	A	T	c.4303A>T	p.Arg1435Ter	p.R1435*	ENST00000457016	16/16	4683/11025	4303/8532	1435/2843	R/*	Aga/Tga
Val_B	SC00975A	colorectal	APC	GRCh37	5	112175288	112175288	Nonsense_Mutation	SNP	A	A	T	c.3997A>T	p.Lys1333Ter	p.K1333*	ENST00000457016	16/16	4377/11025	3997/8532	1333/2843	K/*	Aaa/Taa
Val_B	SC00975A	colorectal	APC	GRCh37	5	112154968	112154971	Frame_Shift_Del	DEL	ACGC	ACGC	-	c.1239_1242delACGC	p.Ile413MetfsTer40	p.I413Mfs*40	ENST00000457016	10/16	1619-1622/11025	1239-1242/8532	413-414/2843	IR/X	atACGC/at
Val_B	SC00976A	colorectal	APC	GRCh37	5	112174096	112174096	Nonsense_Mutation	SNP	C	C	A	c.2805C>A	p.Tyr935Ter	p.Y935*	ENST00000457016	16/16	3185/11025	2805/8532	935/2843	Y/*	taC/taA
Val_B	SC00976A	colorectal	APC	GRCh37	5	112175676	112175677	Frame_Shift_Del	DEL	AG	AG	-	c.4393_4394delAG	p.Ser1465TrpfsTer3	p.S1465Wfs*3	ENST00000457016	16/16	4765-4766/11025	4385-4386/8532	1462/2843	K/X	aAG/a
Val_B	SC00977A	colorectal	APC	GRCh37	5	112175390	112175390	Nonsense_Mutation	SNP	C	C	T	c.4099C>T	p.Gln1367Ter	p.Q1367*	ENST00000457016	16/16	4479/11025	4099/8532	1367/2843	Q/*	Cag/Tag
Val_B	SC00978A	colorectal	APC	GRCh37	5	112175360	112175360	Nonsense_Mutation	SNP	G	G	T	c.4069G>T	p.Gly1357Ter	p.G1357*	ENST00000457016	16/16	4449/11025	4069/8532	1357/2843	G/*	Gga/Tga
Val_B	SC00978A	colorectal	APC	GRCh37	5	112174189	112174189	Frame_Shift_Del	DEL	T	T	-	c.2898delT	p.Ser966ArgfsTer14	p.S966Rfs*14	ENST00000457016	16/16	3278/11025	2898/8532	966/2843	S/X	agT/ag
Val_B	SC00979A	colorectal	APC	GRCh37	5	112164586	112164586	Nonsense_Mutation	SNP	C	C	T	c.1660C>T	p.Arg554Ter	p.R554*	ENST00000457016	14/16	2040/11025	1660/8532	554/2843	R/*	Cga/Tga
Val_B	SC00979A	colorectal	APC	GRCh37	5	112175240	112175243	Frame_Shift_Del	DEL	GAAG	GAAG	AG	c.3949_3950delGA	p.Glu1317ArgfsTer14	p.E1317Rfs*14	ENST00000457016	16/16	4328-4332/11025	3948-3952/8532	1316-1318/2843	AED/ARX	gcTGAAGat/gcTAGat
Val_B	SC00980A	colorectal	APC	GRCh37	5	112162891	112162891	Nonsense_Mutation	SNP	C	C	T	c.1495C>T	p.Arg499Ter	p.R499*	ENST00000457016	12/16	1875/11025	1495/8532	499/2843	R/*	Cga/Tga
Val_B	SC00980A	colorectal	APC	GRCh37	5	112175390	112175390	Nonsense_Mutation	SNP	C	C	T	c.4099C>T	p.Gln1367Ter	p.Q1367*	ENST00000457016	16/16	4479/11025	4099/8532	1367/2843	Q/*	Cag/Tag
Val_B	SC00981A	colorectal	APC	GRCh37	5	112175171	112175171	Nonsense_Mutation	SNP	C	C	T	c.3880C>T	p.Gln1294Ter	p.Q1294*	ENST00000457016	16/16	4260/11025	3880/8532	1294/2843	Q/*	Cag/Tag
Val_B	SC00981A	colorectal	APC	GRCh37	5	112174091	112174094	Frame_Shift_Del	DEL	ACTT	ACTT	-	c.2802_2805delTTAC	p.Tyr935IlefsTer19	p.Y935Ifs*19	ENST00000457016	16/16	3180-3183/11025	2800-2803/8532	934-935/2843	TY/X	ACTTac/ac
Val_B	SC00982A	colorectal	APC	GRCh37	5	112128143	112128143	Nonsense_Mutation	SNP	C	C	T	c.646C>T	p.Arg216Ter	p.R216*	ENST00000457016	7/16	1026/11025	646/8532	216/2843	R/*	Cga/Tga
Val_B	SC00983A	colorectal	APC	GRCh37	5	112174454	112174454	Frame_Shift_Del	DEL	A	A	-	c.3163delA	p.Ile1055Ter	p.I1055*	ENST00000457016	16/16	3543/11025	3163/8532	1055/2843	I/X	Ata/ta
Val_B	SC00983A	colorectal	APC	GRCh37	5	112175144	112175145	Frame_Shift_Ins	INS	-	-	ATGAAAT	c.3855_3861dupTGAAATA	p.Gly1288Ter	p.G1288*	ENST00000457016	16/16	4233-4234/11025	3853-3854/8532	1285/2843	D/DEIX	gat/gATGAAATat
Val_B	SC00985A	colorectal	APC	GRCh37	5	112175772	112175772	Frame_Shift_Del	DEL	A	A	-	c.4483delA	p.Ser1495ValfsTer12	p.S1495Vfs*12	ENST00000457016	16/16	4861/11025	4481/8532	1494/2843	E/X	gAa/ga
Val_B	SC00987A	colorectal	APC	GRCh37	5	112175240	112175240	Nonsense_Mutation	SNP	G	G	T	c.3949G>T	p.Glu1317Ter	p.E1317*	ENST00000457016	16/16	4329/11025	3949/8532	1317/2843	E/*	Gaa/Taa
Val_B	SC00989A	colorectal	APC	GRCh37	5	112174379	112174379	Nonsense_Mutation	SNP	A	A	T	c.3088A>T	p.Lys1030Ter	p.K1030*	ENST00000457016	16/16	3468/11025	3088/8532	1030/2843	K/*	Aaa/Taa
Val_B	SC00989A	colorectal	APC	GRCh37	5	112175576	112175576	Nonsense_Mutation	SNP	C	C	T	c.4285C>T	p.Gln1429Ter	p.Q1429*	ENST00000457016	16/16	4665/11025	4285/8532	1429/2843	Q/*	Caa/Taa
Val_B	SC00990A	colorectal	APC	GRCh37	5	112151204	112151204	Nonsense_Mutation	SNP	C	C	T	c.847C>T	p.Arg283Ter	p.R283*	ENST00000457016	9/16	1227/11025	847/8532	283/2843	R/*	Cga/Tga
Val_B	SC00990A	colorectal	APC	GRCh37	5	112111384	112111384	Nonsense_Mutation	SNP	C	C	T	c.481C>T	p.Gln161Ter	p.Q161*	ENST00000457016	5/16	861/11025	481/8532	161/2843	Q/*	Caa/Taa
Val_B	SC00991A	colorectal	APC	GRCh37	5	112175212	112175216	Frame_Shift_Del	DEL	AAAAG	AAAAG	-	c.3927_3931delAAAGA	p.Glu1309AspfsTer4	p.E1309Dfs*4	ENST00000457016	16/16	4301-4305/11025	3921-3925/8532	1307-1309/2843	IKE/IX	atAAAAGaa/ataa
Val_B	SC00992A	colorectal	APC	GRCh37	5	112162891	112162891	Nonsense_Mutation	SNP	C	C	T	c.1495C>T	p.Arg499Ter	p.R499*	ENST00000457016	12/16	1875/11025	1495/8532	499/2843	R/*	Cga/Tga
Val_B	SC00992A	colorectal	APC	GRCh37	5	112175348	112175348	Nonsense_Mutation	SNP	G	G	T	c.4057G>T	p.Glu1353Ter	p.E1353*	ENST00000457016	16/16	4437/11025	4057/8532	1353/2843	E/*	Gaa/Taa
Val_B	SC00993A	colorectal	APC	GRCh37	5	112175480	112175480	Nonsense_Mutation	SNP	G	G	T	c.4189G>T	p.Glu1397Ter	p.E1397*	ENST00000457016	16/16	4569/11025	4189/8532	1397/2843	E/*	Gag/Tag
Val_B	SC00993A	colorectal	APC	GRCh37	5	112154999	112154999	Nonsense_Mutation	SNP	C	C	T	c.1270C>T	p.Gln424Ter	p.Q424*	ENST00000457016	10/16	1650/11025	1270/8532	424/2843	Q/*	Cag/Tag
Val_B	SC00995A	colorectal	APC	GRCh37	5	112173917	112173917	Nonsense_Mutation	SNP	C	C	T	c.2626C>T	p.Arg876Ter	p.R876*	ENST00000457016	16/16	3006/11025	2626/8532	876/2843	R/*	Cga/Tga
Val_B	SC00995A	colorectal	APC	GRCh37	5	112175756	112175756	Frame_Shift_Del	DEL	T	T	-	c.4466delT	p.Leu1489TyrfsTer18	p.L1489Yfs*18	ENST00000457016	16/16	4845/11025	4465/8532	1489/2843	L/X	Tta/ta
Val_B	SC00996A	colorectal	APC	GRCh37	5	112174394	112174394	Nonsense_Mutation	SNP	C	C	T	c.3103C>T	p.Gln1035Ter	p.Q1035*	ENST00000457016	16/16	3483/11025	3103/8532	1035/2843	Q/*	Cag/Tag
Val_B	SC00996A	colorectal	APC	GRCh37	5	112175216	112175216	Nonsense_Mutation	SNP	G	G	T	c.3925G>T	p.Glu1309Ter	p.E1309*	ENST00000457016	16/16	4305/11025	3925/8532	1309/2843	E/*	Gaa/Taa
Val_B	SC00999A	colorectal	APC	GRCh37	5	112175414	112175445	Frame_Shift_Del	DEL	CACTATGTTCAGGAGACCCCACTCATGTTTAG	CACTATGTTCAGGAGACCCCACTCATGTTTAG	-	c.4125_4156delCTATGTTCAGGAGACCCCACTCATGTTTAGCA	p.His1375GlnfsTer9	p.H1375Qfs*9	ENST00000457016	16/16	4503-4534/11025	4123-4154/8532	1375-1385/2843	HYVQETPLMFS/X	CACTATGTTCAGGAGACCCCACTCATGTTTAGc/c
Val_B	SC01000A	colorectal	APC	GRCh37	5	112175429	112175430	Frame_Shift_Ins	INS	-	-	C	c.4142dupC	p.Leu1382ThrfsTer4	p.L1382Tfs*4	ENST00000457016	16/16	4518-4519/11025	4138-4139/8532	1380/2843	T/TX	acc/aCcc
Val_B	SC01003A	colorectal	APC	GRCh37	5	112151261	112151261	Nonsense_Mutation	SNP	C	C	T	c.904C>T	p.Arg302Ter	p.R302*	ENST00000457016	9/16	1284/11025	904/8532	302/2843	R/*	Cga/Tga
Val_B	SC01003A	colorectal	APC	GRCh37	5	112175303	112175303	Nonsense_Mutation	SNP	C	C	T	c.4012C>T	p.Gln1338Ter	p.Q1338*	ENST00000457016	16/16	4392/11025	4012/8532	1338/2843	Q/*	Cag/Tag
Val_B	SC01003A	colorectal	APC	GRCh37	5	112175676	112175677	Frame_Shift_Del	DEL	AG	AG	-	c.4393_4394delAG	p.Ser1465TrpfsTer3	p.S1465Wfs*3	ENST00000457016	16/16	4765-4766/11025	4385-4386/8532	1462/2843	K/X	aAG/a
Val_B	SC01004A	colorectal	APC	GRCh37	5	112175147	112175147	Nonsense_Mutation	SNP	G	G	T	c.3856G>T	p.Glu1286Ter	p.E1286*	ENST00000457016	16/16	4236/11025	3856/8532	1286/2843	E/*	Gaa/Taa
Val_B	SC01006A	colorectal	APC	GRCh37	5	112175216	112175216	Nonsense_Mutation	SNP	G	G	T	c.3925G>T	p.Glu1309Ter	p.E1309*	ENST00000457016	16/16	4305/11025	3925/8532	1309/2843	E/*	Gaa/Taa
Val_B	SC01007A	colorectal	APC	GRCh37	5	112170863	112170863	Splice_Site	SNP	G	G	T	c.1958+1G>T		p.X653_splice	ENST00000457016		-/11025	1958/8532	653/2843
Val_B	SC01007A	colorectal	APC	GRCh37	5	112128168	112128168	Frame_Shift_Del	DEL	T	T	-	c.671delT	p.Ile224ThrfsTer69	p.I224Tfs*69	ENST00000457016	7/16	1051/11025	671/8532	224/2843	I/X	aTc/ac
Val_B	SC01009A	colorectal	APC	GRCh37	5	112175390	112175390	Nonsense_Mutation	SNP	C	C	T	c.4099C>T	p.Gln1367Ter	p.Q1367*	ENST00000457016	16/16	4479/11025	4099/8532	1367/2843	Q/*	Cag/Tag
Val_B	SC01010A	colorectal	APC	GRCh37	5	112175207	112175207	Nonsense_Mutation	SNP	G	G	T	c.3916G>T	p.Glu1306Ter	p.E1306*	ENST00000457016	16/16	4296/11025	3916/8532	1306/2843	E/*	Gaa/Taa
Val_B	SC01011A	colorectal	APC	GRCh37	5	112175348	112175348	Nonsense_Mutation	SNP	G	G	T	c.4057G>T	p.Glu1353Ter	p.E1353*	ENST00000457016	16/16	4437/11025	4057/8532	1353/2843	E/*	Gaa/Taa
Val_B	SC01011A	colorectal	APC	GRCh37	5	112173901	112173901	Frame_Shift_Del	DEL	A	A	-	c.2610delA	p.Gly871GlufsTer45	p.G871Efs*45	ENST00000457016	16/16	2990/11025	2610/8532	870/2843	P/X	ccA/cc
Val_B	SC01012A	colorectal	APC	GRCh37	5	112173368	112173368	Nonsense_Mutation	SNP	A	A	T	c.2077A>T	p.Lys693Ter	p.K693*	ENST00000457016	16/16	2457/11025	2077/8532	693/2843	K/*	Aaa/Taa
Val_B	SC01012A	colorectal	APC	GRCh37	5	112175322	112175322	Nonsense_Mutation	SNP	C	C	G	c.4031C>G	p.Ser1344Ter	p.S1344*	ENST00000457016	16/16	4411/11025	4031/8532	1344/2843	S/*	tCa/tGa
Val_B	SC01013A	colorectal	APC	GRCh37	5	112175390	112175390	Nonsense_Mutation	SNP	C	C	T	c.4099C>T	p.Gln1367Ter	p.Q1367*	ENST00000457016	16/16	4479/11025	4099/8532	1367/2843	Q/*	Cag/Tag
Val_B	SC01013A	colorectal	APC	GRCh37	5	112175348	112175348	Nonsense_Mutation	SNP	G	G	T	c.4057G>T	p.Glu1353Ter	p.E1353*	ENST00000457016	16/16	4437/11025	4057/8532	1353/2843	E/*	Gaa/Taa
Val_B	SC01013A	colorectal	APC	GRCh37	5	112162946	112162946	Splice_Site	SNP	T	T	G	c.1548+2T>G		p.X516_splice	ENST00000457016		-/11025	1548/8532	516/2843
Val_B	SC01014A	colorectal	APC	GRCh37	5	112174835	112174835	Nonsense_Mutation	SNP	A	A	T	c.3544A>T	p.Lys1182Ter	p.K1182*	ENST00000457016	16/16	3924/11025	3544/8532	1182/2843	K/*	Aaa/Taa
Val_B	SC01015A	colorectal	APC	GRCh37	5	112128191	112128191	Nonsense_Mutation	SNP	C	C	T	c.694C>T	p.Arg232Ter	p.R232*	ENST00000457016	7/16	1074/11025	694/8532	232/2843	R/*	Cga/Tga
Val_B	SC01016A	colorectal	APC	GRCh37	5	112174410	112174417	Frame_Shift_Del	DEL	GGCAAAGT	GGCAAAGT	-	c.3119_3126delGGCAAAGT	p.Arg1040ThrfsTer5	p.R1040Tfs*5	ENST00000457016	16/16	3499-3506/11025	3119-3126/8532	1040-1042/2843	RQS/X	aGGCAAAGT/a
Val_B	SC01016A	colorectal	APC	GRCh37	5	112175746	112175746	Frame_Shift_Del	DEL	T	T	-	c.4455delT	p.Asp1486IlefsTer21	p.D1486Ifs*21	ENST00000457016	16/16	4835/11025	4455/8532	1485/2843	A/X	gcT/gc
Val_B	SC01018A	colorectal	APC	GRCh37	5	112175348	112175348	Nonsense_Mutation	SNP	G	G	T	c.4057G>T	p.Glu1353Ter	p.E1353*	ENST00000457016	16/16	4437/11025	4057/8532	1353/2843	E/*	Gaa/Taa
Val_B	SC01020A	colorectal	APC	GRCh37	5	112173917	112173917	Nonsense_Mutation	SNP	C	C	T	c.2626C>T	p.Arg876Ter	p.R876*	ENST00000457016	16/16	3006/11025	2626/8532	876/2843	R/*	Cga/Tga
Val_B	SC01020A	colorectal	APC	GRCh37	5	112157627	112157628	Frame_Shift_Del	DEL	TG	TG	-	c.1354_1355delGT	p.Val452SerfsTer7	p.V452Sfs*7	ENST00000457016	11/16	1727-1728/11025	1347-1348/8532	449-450/2843	AV/AX	gcTGtg/gctg
Val_B	SC01021A	colorectal	APC	GRCh37	5	112116592	112116592	Nonsense_Mutation	SNP	C	C	T	c.637C>T	p.Arg213Ter	p.R213*	ENST00000457016	6/16	1017/11025	637/8532	213/2843	R/*	Cga/Tga
Val_B	SC01021A	colorectal	APC	GRCh37	5	112175417	112175418	Frame_Shift_Del	DEL	TA	TA	-	c.4127_4128delAT	p.Tyr1376CysfsTer9	p.Y1376Cfs*9	ENST00000457016	16/16	4506-4507/11025	4126-4127/8532	1376/2843	Y/X	TAt/t
Val_B	SC01022A	colorectal	APC	GRCh37	5	112175207	112175207	Nonsense_Mutation	SNP	G	G	T	c.3916G>T	p.Glu1306Ter	p.E1306*	ENST00000457016	16/16	4296/11025	3916/8532	1306/2843	E/*	Gaa/Taa
Val_B	SC01024A	colorectal	APC	GRCh37	5	112175530	112175530	Frame_Shift_Del	DEL	G	G	-	c.4240delG	p.Val1414Ter	p.V1414*	ENST00000457016	16/16	4619/11025	4239/8532	1413/2843	M/X	atG/at
Val_B	SC01025A	colorectal	APC	GRCh37	5	112174631	112174631	Nonsense_Mutation	SNP	C	C	T	c.3340C>T	p.Arg1114Ter	p.R1114*	ENST00000457016	16/16	3720/11025	3340/8532	1114/2843	R/*	Cga/Tga
Val_B	SC01025A	colorectal	APC	GRCh37	5	112175347	112175363	Frame_Shift_Del	DEL	TGAATTTTCTTCAGGAG	TGAATTTTCTTCAGGAG	-	c.4056_4072delTGAATTTTCTTCAGGAG	p.Phe1354IlefsTer15	p.F1354Ifs*15	ENST00000457016	16/16	4436-4452/11025	4056-4072/8532	1352-1358/2843	VEFSSGA/VX	gtTGAATTTTCTTCAGGAGcg/gtcg
Val_B	SC01026A	colorectal	APC	GRCh37	5	112174631	112174631	Nonsense_Mutation	SNP	C	C	T	c.3340C>T	p.Arg1114Ter	p.R1114*	ENST00000457016	16/16	3720/11025	3340/8532	1114/2843	R/*	Cga/Tga
Val_B	SC01026A	colorectal	APC	GRCh37	5	112175246	112175246	Frame_Shift_Del	DEL	C	C	-	c.3956delC	p.Pro1319LeufsTer2	p.P1319Lfs*2	ENST00000457016	16/16	4335/11025	3955/8532	1319/2843	P/X	Cct/ct
Val_B	SC01031A	colorectal	APC	GRCh37	5	112163683	112163683	Nonsense_Mutation	SNP	G	G	T	c.1606G>T	p.Glu536Ter	p.E536*	ENST00000457016	13/16	1986/11025	1606/8532	536/2843	E/*	Gaa/Taa
Val_B	SC01032A	colorectal	APC	GRCh37	5	112175212	112175216	Frame_Shift_Del	DEL	AAAAG	AAAAG	-	c.3927_3931delAAAGA	p.Glu1309AspfsTer4	p.E1309Dfs*4	ENST00000457016	16/16	4301-4305/11025	3921-3925/8532	1307-1309/2843	IKE/IX	atAAAAGaa/ataa
Val_B	SC01033A	colorectal	APC	GRCh37	5	112175480	112175480	Nonsense_Mutation	SNP	G	G	T	c.4189G>T	p.Glu1397Ter	p.E1397*	ENST00000457016	16/16	4569/11025	4189/8532	1397/2843	E/*	Gag/Tag
Val_B	SC01033A	colorectal	APC	GRCh37	5	112151270	112151271	Frame_Shift_Ins	INS	-	-	CAAGTCAT	c.915_922dupAAGTCATC	p.Leu308GlnfsTer31	p.L308Qfs*31	ENST00000457016	9/16	1293-1294/11025	913-914/8532	305/2843	T/TSHX	aca/aCAAGTCATca
Val_B	SC01034A	colorectal	APC	GRCh37	5	112175171	112175171	Nonsense_Mutation	SNP	C	C	T	c.3880C>T	p.Gln1294Ter	p.Q1294*	ENST00000457016	16/16	4260/11025	3880/8532	1294/2843	Q/*	Cag/Tag
Val_B	SC01037A	colorectal	APC	GRCh37	5	112175423	112175423	Nonsense_Mutation	SNP	C	C	T	c.4132C>T	p.Gln1378Ter	p.Q1378*	ENST00000457016	16/16	4512/11025	4132/8532	1378/2843	Q/*	Cag/Tag
Val_B	SC01039A	colorectal	APC	GRCh37	5	112175255	112175255	Nonsense_Mutation	SNP	G	G	T	c.3964G>T	p.Glu1322Ter	p.E1322*	ENST00000457016	16/16	4344/11025	3964/8532	1322/2843	E/*	Gaa/Taa
Val_B	SC01040A	colorectal	APC	GRCh37	5	112175100	112175101	Frame_Shift_Ins	INS	-	-	T	c.3814dupT	p.Ser1272PhefsTer4	p.S1272Ffs*4	ENST00000457016	16/16	4189-4190/11025	3809-3810/8532	1270/2843	C/CX	tgt/tgTt
Val_B	SC01040A	colorectal	APC	GRCh37	5	112175536	112175536	Frame_Shift_Del	DEL	T	T	-	c.4245delT	p.Ser1415ArgfsTer4	p.S1415Rfs*4	ENST00000457016	16/16	4625/11025	4245/8532	1415/2843	S/X	agT/ag
Val_B	SC01190A	colorectal	APC	GRCh37	5	112175162	112175162	Frame_Shift_Del	DEL	C	C	-	c.3871delC	p.Gln1291ArgfsTer14	p.Q1291Rfs*14	ENST00000457016	16/16	4251/11025	3871/8532	1291/2843	Q/X	Cag/ag
Val_B	SC01193A	colorectal	APC	GRCh37	5	112175753	112175759	Frame_Shift_Del	DEL	TTATTAC	TTATTAC	-	c.4462_4468delTTATTAC	p.Leu1488IlefsTer17	p.L1488Ifs*17	ENST00000457016	16/16	4842-4848/11025	4462-4468/8532	1488-1490/2843	LLH/X	TTATTACat/at
Val_B	SC01194A	colorectal	APC	GRCh37	5	112128143	112128143	Nonsense_Mutation	SNP	C	C	T	c.646C>T	p.Arg216Ter	p.R216*	ENST00000457016	7/16	1026/11025	646/8532	216/2843	R/*	Cga/Tga
Val_B	SC01194A	colorectal	APC	GRCh37	5	112178000	112178000	Nonsense_Mutation	SNP	C	C	T	c.6709C>T	p.Arg2237Ter	p.R2237*	ENST00000457016	16/16	7089/11025	6709/8532	2237/2843	R/*	Cga/Tga
Val_B	SC01195A	colorectal	APC	GRCh37	5	112151204	112151204	Nonsense_Mutation	SNP	C	C	T	c.847C>T	p.Arg283Ter	p.R283*	ENST00000457016	9/16	1227/11025	847/8532	283/2843	R/*	Cga/Tga
Val_B	SC01195A	colorectal	APC	GRCh37	5	112175519	112175519	Frame_Shift_Del	DEL	T	T	-	c.4228delT	p.Cys1410AlafsTer5	p.C1410Afs*5	ENST00000457016	16/16	4608/11025	4228/8532	1410/2843	C/X	Tgc/gc
Val_B	SC01196A	colorectal	APC	GRCh37	5	112173679	112173679	Nonsense_Mutation	SNP	T	T	G	c.2388T>G	p.Tyr796Ter	p.Y796*	ENST00000457016	16/16	2768/11025	2388/8532	796/2843	Y/*	taT/taG
Val_B	SC01196A	colorectal	APC	GRCh37	5	112175371	112175372	Frame_Shift_Ins	INS	-	-	C	c.4083dupC	p.Ser1362LeufsTer13	p.S1362Lfs*13	ENST00000457016	16/16	4460-4461/11025	4080-4081/8532	1360-1361/2843	-/X	-/C
Val_B	SC01198A	colorectal	APC	GRCh37	5	112175174	112175174	Nonsense_Mutation	SNP	G	G	T	c.3883G>T	p.Glu1295Ter	p.E1295*	ENST00000457016	16/16	4263/11025	3883/8532	1295/2843	E/*	Gaa/Taa
Val_B	SC01198A	colorectal	APC	GRCh37	5	112116592	112116592	Nonsense_Mutation	SNP	C	C	T	c.637C>T	p.Arg213Ter	p.R213*	ENST00000457016	6/16	1017/11025	637/8532	213/2843	R/*	Cga/Tga
Val_B	SC01200A	colorectal	APC	GRCh37	5	112175235	112175235	Nonsense_Mutation	SNP	C	C	G	c.3944C>G	p.Ser1315Ter	p.S1315*	ENST00000457016	16/16	4324/11025	3944/8532	1315/2843	S/*	tCa/tGa
Val_B	SC01200A	colorectal	APC	GRCh37	5	112154985	112154991	Frame_Shift_Del	DEL	CCTGTTG	CCTGTTG	-	c.1256_1262delCCTGTTG	p.Thr419ArgfsTer33	p.T419Rfs*33	ENST00000457016	10/16	1636-1642/11025	1256-1262/8532	419-421/2843	TCW/X	aCCTGTTGg/ag
Val_B	SC01205A	colorectal	APC	GRCh37	5	112173451	112173451	Frame_Shift_Del	DEL	G	G	-	c.2162delG	p.Gly721GlufsTer6	p.G721Efs*6	ENST00000457016	16/16	2540/11025	2160/8532	720/2843	M/X	atG/at
Val_B	SC01207A	colorectal	APC	GRCh37	5	112175171	112175171	Nonsense_Mutation	SNP	C	C	T	c.3880C>T	p.Gln1294Ter	p.Q1294*	ENST00000457016	16/16	4260/11025	3880/8532	1294/2843	Q/*	Cag/Tag
Val_B	SC01207A	colorectal	APC	GRCh37	5	112173876	112173877	Frame_Shift_Ins	INS	-	-	CTAC	c.2587_2590dupTACC	p.His864LeufsTer49	p.H864Lfs*49	ENST00000457016	16/16	2965-2966/11025	2585-2586/8532	862/2843	N/NYX	aac/aaCTACc
Val_B	SC01208A	colorectal	APC	GRCh37	5	112164616	112164616	Nonsense_Mutation	SNP	C	C	T	c.1690C>T	p.Arg564Ter	p.R564*	ENST00000457016	14/16	2070/11025	1690/8532	564/2843	R/*	Cga/Tga
Val_B	SC01208A	colorectal	APC	GRCh37	5	112175639	112175639	Nonsense_Mutation	SNP	C	C	T	c.4348C>T	p.Arg1450Ter	p.R1450*	ENST00000457016	16/16	4728/11025	4348/8532	1450/2843	R/*	Cga/Tga
Val_B	SC01211A	colorectal	APC	GRCh37	5	112175212	112175216	Frame_Shift_Del	DEL	AAAAG	AAAAG	-	c.3927_3931delAAAGA	p.Glu1309AspfsTer4	p.E1309Dfs*4	ENST00000457016	16/16	4301-4305/11025	3921-3925/8532	1307-1309/2843	IKE/IX	atAAAAGaa/ataa
Val_B	SC01217A	colorectal	APC	GRCh37	5	112175490	112175490	Nonsense_Mutation	SNP	C	C	A	c.4199C>A	p.Ser1400Ter	p.S1400*	ENST00000457016	16/16	4579/11025	4199/8532	1400/2843	S/*	tCg/tAg
Val_B	SC01218A	colorectal	APC	GRCh37	5	112151204	112151204	Nonsense_Mutation	SNP	C	C	T	c.847C>T	p.Arg283Ter	p.R283*	ENST00000457016	9/16	1227/11025	847/8532	283/2843	R/*	Cga/Tga
Val_B	SC01219A	colorectal	APC	GRCh37	5	112175510	112175510	Frame_Shift_Del	DEL	A	A	-	c.4219delA	p.Ser1407ValfsTer8	p.S1407Vfs*8	ENST00000457016	16/16	4599/11025	4219/8532	1407/2843	S/X	Agt/gt
Val_B	SC01221A	colorectal	APC	GRCh37	5	112173926	112173926	Nonsense_Mutation	SNP	C	C	T	c.2635C>T	p.Gln879Ter	p.Q879*	ENST00000457016	16/16	3015/11025	2635/8532	879/2843	Q/*	Cag/Tag
Val_B	SC01221A	colorectal	APC	GRCh37	5	112175620	112175621	Frame_Shift_Del	DEL	TC	TC	A	c.4329_4330delTCinsA	p.Gln1444LysfsTer29	p.Q1444Kfs*29	ENST00000457016	16/16	4707-4710/11025	4327-4330/8532	1443-1444/2843	PQ/PX	CCTCaa/CCAaa
Val_B	SC01225A	colorectal	APC	GRCh37	5	112175423	112175423	Nonsense_Mutation	SNP	C	C	T	c.4132C>T	p.Gln1378Ter	p.Q1378*	ENST00000457016	16/16	4512/11025	4132/8532	1378/2843	Q/*	Cag/Tag
Val_B	SC01227A	colorectal	APC	GRCh37	5	112175358	112175358	Nonsense_Mutation	SNP	C	C	G	c.4067C>G	p.Ser1356Ter	p.S1356*	ENST00000457016	16/16	4447/11025	4067/8532	1356/2843	S/*	tCa/tGa
Val_B	SC01229A	colorectal	APC	GRCh37	5	112175775	112175775	Frame_Shift_Del	DEL	G	G	-	c.4484delG	p.Ser1495IlefsTer12	p.S1495Ifs*12	ENST00000457016	16/16	4864/11025	4484/8532	1495/2843	S/X	aGt/at
Val_B	SC01230A	colorectal	APC	GRCh37	5	112173393	112173394	Frame_Shift_Ins	INS	-	-	G	c.2107dupG	p.Ala703GlyfsTer3	p.A703Gfs*3	ENST00000457016	16/16	2482-2483/11025	2102-2103/8532	701/2843	M/MX	atg/atGg
Val_B	SC01230A	colorectal	APC	GRCh37	5	112175600	112175600	Frame_Shift_Del	DEL	A	A	-	c.4312delA	p.Thr1438HisfsTer35	p.T1438Hfs*35	ENST00000457016	16/16	4689/11025	4309/8532	1437/2843	K/X	Aaa/aa
Val_B	SC01232A	colorectal	APC	GRCh37	5	112175595	112175595	Frame_Shift_Del	DEL	G	G	-	c.4304delG	p.Arg1435LysfsTer38	p.R1435Kfs*38	ENST00000457016	16/16	4684/11025	4304/8532	1435/2843	R/X	aGa/aa
Val_B	SC01235A	colorectal	APC	GRCh37	5	112176022	112176037	Frame_Shift_Del	DEL	ATGTATTATTTCTGCC	ATGTATTATTTCTGCC	-	c.4734_4749delTATTATTTCTGCCATG	p.Ile1579GlnfsTer66	p.I1579Qfs*66	ENST00000457016	16/16	5111-5126/11025	4731-4746/8532	1577-1582/2843	ECIISA/X	gaATGTATTATTTCTGCC/ga
Val_B	SC01238A	colorectal	APC	GRCh37	5	112170863	112170863	Splice_Site	SNP	G	G	A	c.1958+1G>A		p.X653_splice	ENST00000457016		-/11025	1958/8532	653/2843
Val_B	SC01239A	colorectal	APC	GRCh37	5	112175423	112175423	Nonsense_Mutation	SNP	C	C	T	c.4132C>T	p.Gln1378Ter	p.Q1378*	ENST00000457016	16/16	4512/11025	4132/8532	1378/2843	Q/*	Cag/Tag
Val_B	SC01242A	colorectal	APC	GRCh37	5	112128191	112128191	Nonsense_Mutation	SNP	C	C	T	c.694C>T	p.Arg232Ter	p.R232*	ENST00000457016	7/16	1074/11025	694/8532	232/2843	R/*	Cga/Tga
Val_B	SC01242A	colorectal	APC	GRCh37	5	112175271	112175271	Nonsense_Mutation	SNP	C	C	A	c.3980C>A	p.Ser1327Ter	p.S1327*	ENST00000457016	16/16	4360/11025	3980/8532	1327/2843	S/*	tCa/tAa
Val_B	SC01243A	colorectal	APC	GRCh37	5	112175507	112175507	Nonsense_Mutation	SNP	C	C	T	c.4216C>T	p.Gln1406Ter	p.Q1406*	ENST00000457016	16/16	4596/11025	4216/8532	1406/2843	Q/*	Cag/Tag
Val_B	SC01244A	colorectal	APC	GRCh37	5	112175639	112175639	Nonsense_Mutation	SNP	C	C	T	c.4348C>T	p.Arg1450Ter	p.R1450*	ENST00000457016	16/16	4728/11025	4348/8532	1450/2843	R/*	Cga/Tga
Val_B	SC01245A	colorectal	APC	GRCh37	5	112173801	112173801	Nonsense_Mutation	SNP	C	C	A	c.2510C>A	p.Ser837Ter	p.S837*	ENST00000457016	16/16	2890/11025	2510/8532	837/2843	S/*	tCa/tAa
Val_B	SC01246A	colorectal	APC	GRCh37	5	112174685	112174685	Nonsense_Mutation	SNP	G	G	T	c.3394G>T	p.Glu1132Ter	p.E1132*	ENST00000457016	16/16	3774/11025	3394/8532	1132/2843	E/*	Gaa/Taa
Val_B	SC01248A	colorectal	APC	GRCh37	5	112116592	112116592	Nonsense_Mutation	SNP	C	C	T	c.637C>T	p.Arg213Ter	p.R213*	ENST00000457016	6/16	1017/11025	637/8532	213/2843	R/*	Cga/Tga
Val_B	SC01248A	colorectal	APC	GRCh37	5	112175198	112175198	Nonsense_Mutation	SNP	C	C	T	c.3907C>T	p.Gln1303Ter	p.Q1303*	ENST00000457016	16/16	4287/11025	3907/8532	1303/2843	Q/*	Caa/Taa
Val_B	SC01249A	colorectal	APC	GRCh37	5	112175147	112175147	Nonsense_Mutation	SNP	G	G	T	c.3856G>T	p.Glu1286Ter	p.E1286*	ENST00000457016	16/16	4236/11025	3856/8532	1286/2843	E/*	Gaa/Taa
Val_B	SC01249A	colorectal	APC	GRCh37	5	112174631	112174631	Nonsense_Mutation	SNP	C	C	T	c.3340C>T	p.Arg1114Ter	p.R1114*	ENST00000457016	16/16	3720/11025	3340/8532	1114/2843	R/*	Cga/Tga
Val_B	SC01250A	colorectal	APC	GRCh37	5	112175153	112175153	Frame_Shift_Del	DEL	G	G	-	c.3863delG	p.Gly1288AspfsTer17	p.G1288Dfs*17	ENST00000457016	16/16	4242/11025	3862/8532	1288/2843	G/X	Gga/ga
Val_B	SC01251A	colorectal	APC	GRCh37	5	112175217	112175217	Frame_Shift_Del	DEL	A	A	-	c.3929delA	p.Lys1310ArgfsTer11	p.K1310Rfs*11	ENST00000457016	16/16	4306/11025	3926/8532	1309/2843	E/X	gAa/ga
Val_B	SC01252A	colorectal	APC	GRCh37	5	112162918	112162919	Frame_Shift_Del	DEL	TT	TT	-	c.1522_1523delTT	p.Leu508AspfsTer28	p.L508Dfs*28	ENST00000457016	12/16	1902-1903/11025	1522-1523/8532	508/2843	L/X	TTg/g
Val_B	SC01252A	colorectal	APC	GRCh37	5	112175211	112175212	Frame_Shift_Ins	INS	-	-	A	c.3924dupA	p.Glu1309ArgfsTer6	p.E1309Rfs*6	ENST00000457016	16/16	4300-4301/11025	3920-3921/8532	1307/2843	I/IX	ata/atAa
Val_B	SC01253A	colorectal	APC	GRCh37	5	112175639	112175639	Nonsense_Mutation	SNP	C	C	T	c.4348C>T	p.Arg1450Ter	p.R1450*	ENST00000457016	16/16	4728/11025	4348/8532	1450/2843	R/*	Cga/Tga
Val_B	SC01253A	colorectal	APC	GRCh37	5	112173947	112173947	Nonsense_Mutation	SNP	C	C	T	c.2656C>T	p.Gln886Ter	p.Q886*	ENST00000457016	16/16	3036/11025	2656/8532	886/2843	Q/*	Cag/Tag
Val_B	SC01254A	colorectal	APC	GRCh37	5	112175217	112175217	Frame_Shift_Del	DEL	A	A	-	c.3929delA	p.Lys1310ArgfsTer11	p.K1310Rfs*11	ENST00000457016	16/16	4306/11025	3926/8532	1309/2843	E/X	gAa/ga
Val_B	SC01254A	colorectal	APC	GRCh37	5	112174507	112174508	Frame_Shift_Ins	INS	-	-	AC	c.3218_3219dupCA	p.Thr1074GlnfsTer53	p.T1074Qfs*53	ENST00000457016	16/16	3596-3597/11025	3216-3217/8532	1072-1073/2843	-/X	-/AC
Val_B	SC01255A	colorectal	APC	GRCh37	5	112173917	112173917	Nonsense_Mutation	SNP	C	C	T	c.2626C>T	p.Arg876Ter	p.R876*	ENST00000457016	16/16	3006/11025	2626/8532	876/2843	R/*	Cga/Tga
Val_B	SC01255A	colorectal	APC	GRCh37	5	112175480	112175481	Frame_Shift_Del	DEL	GA	GA	-	c.4192_4193delAG	p.Arg1399PhefsTer9	p.R1399Ffs*9	ENST00000457016	16/16	4569-4570/11025	4189-4190/8532	1397/2843	E/X	GAg/g
Val_B	SC01258A	colorectal	APC	GRCh37	5	112164586	112164586	Nonsense_Mutation	SNP	C	C	T	c.1660C>T	p.Arg554Ter	p.R554*	ENST00000457016	14/16	2040/11025	1660/8532	554/2843	R/*	Cga/Tga
Val_B	SC01261A	colorectal	APC	GRCh37	5	112175162	112175162	Nonsense_Mutation	SNP	C	C	T	c.3871C>T	p.Gln1291Ter	p.Q1291*	ENST00000457016	16/16	4251/11025	3871/8532	1291/2843	Q/*	Cag/Tag
Val_B	SC01268A	colorectal	APC	GRCh37	5	112173704	112173704	Nonsense_Mutation	SNP	C	C	T	c.2413C>T	p.Arg805Ter	p.R805*	ENST00000457016	16/16	2793/11025	2413/8532	805/2843	R/*	Cga/Tga
Val_B	SC01269A	colorectal	APC	GRCh37	5	112175180	112175180	Frame_Shift_Del	DEL	G	G	-	c.3889delG	p.Asp1297IlefsTer8	p.D1297Ifs*8	ENST00000457016	16/16	4269/11025	3889/8532	1297/2843	D/X	Gat/at
Val_B	SC01270A	colorectal	APC	GRCh37	5	112175212	112175216	Frame_Shift_Del	DEL	AAAAG	AAAAG	-	c.3927_3931delAAAGA	p.Glu1309AspfsTer4	p.E1309Dfs*4	ENST00000457016	16/16	4301-4305/11025	3921-3925/8532	1307-1309/2843	IKE/IX	atAAAAGaa/ataa
Val_B	SC01272A	colorectal	APC	GRCh37	5	112174495	112174498	Frame_Shift_Del	DEL	AAGG	AAGG	-	c.3206_3209delGGAA	p.Arg1069IlefsTer56	p.R1069Ifs*56	ENST00000457016	16/16	3584-3587/11025	3204-3207/8532	1068-1069/2843	SR/X	tcAAGG/tc
Val_B	SC01274A	colorectal	APC	GRCh37	5	112175212	112175216	Frame_Shift_Del	DEL	AAAAG	AAAAG	-	c.3927_3931delAAAGA	p.Glu1309AspfsTer4	p.E1309Dfs*4	ENST00000457016	16/16	4301-4305/11025	3921-3925/8532	1307-1309/2843	IKE/IX	atAAAAGaa/ataa
Val_B	SC01274A	colorectal	APC	GRCh37	5	112173484	112173484	Frame_Shift_Del	DEL	A	A	-	c.2195delA	p.Asn732IlefsTer29	p.N732Ifs*29	ENST00000457016	16/16	2573/11025	2193/8532	731/2843	A/X	gcA/gc
Val_B	SC01275A	colorectal	APC	GRCh37	5	112151244	112151245	Frame_Shift_Ins	INS	-	-	CA	c.893_894dupAC	p.Ser299ThrfsTer7	p.S299Tfs*7	ENST00000457016	9/16	1267-1268/11025	887-888/8532	296/2843	S/SX	agc/agCAc
Val_B	SC01276A	colorectal	APC	GRCh37	5	112175171	112175171	Nonsense_Mutation	SNP	C	C	T	c.3880C>T	p.Gln1294Ter	p.Q1294*	ENST00000457016	16/16	4260/11025	3880/8532	1294/2843	Q/*	Cag/Tag
Val_B	SC01278A	colorectal	APC	GRCh37	5	112116592	112116592	Nonsense_Mutation	SNP	C	C	T	c.637C>T	p.Arg213Ter	p.R213*	ENST00000457016	6/16	1017/11025	637/8532	213/2843	R/*	Cga/Tga
Val_B	SC01279A	colorectal	APC	GRCh37	5	112173917	112173917	Nonsense_Mutation	SNP	C	C	T	c.2626C>T	p.Arg876Ter	p.R876*	ENST00000457016	16/16	3006/11025	2626/8532	876/2843	R/*	Cga/Tga
Val_B	SC01281A	colorectal	APC	GRCh37	5	112174223	112174224	Frame_Shift_Ins	INS	-	-	A	c.2935dupA	p.Met979AsnfsTer6	p.M979Nfs*6	ENST00000457016	16/16	3312-3313/11025	2932-2933/8532	978/2843	Q/QX	caa/cAaa
Val_B	SC01282A	colorectal	APC	GRCh37	5	112164586	112164586	Nonsense_Mutation	SNP	C	C	T	c.1660C>T	p.Arg554Ter	p.R554*	ENST00000457016	14/16	2040/11025	1660/8532	554/2843	R/*	Cga/Tga
Val_B	SC01282A	colorectal	APC	GRCh37	5	112175480	112175481	Frame_Shift_Del	DEL	GA	GA	-	c.4192_4193delAG	p.Arg1399PhefsTer9	p.R1399Ffs*9	ENST00000457016	16/16	4569-4570/11025	4189-4190/8532	1397/2843	E/X	GAg/g
Val_B	SC01283A	colorectal	APC	GRCh37	5	112137042	112137043	Frame_Shift_Del	DEL	GT	GT	-	c.797_798delTG	p.Val266GlyfsTer10	p.V266Gfs*10	ENST00000457016	8/16	1176-1177/11025	796-797/8532	266/2843	V/X	GTg/g
Val_B	SC01284A	colorectal	APC	GRCh37	5	112173653	112173653	Nonsense_Mutation	SNP	A	A	T	c.2362A>T	p.Lys788Ter	p.K788*	ENST00000457016	16/16	2742/11025	2362/8532	788/2843	K/*	Aag/Tag
Val_B	SC01285A	colorectal	APC	GRCh37	5	112164586	112164586	Nonsense_Mutation	SNP	C	C	T	c.1660C>T	p.Arg554Ter	p.R554*	ENST00000457016	14/16	2040/11025	1660/8532	554/2843	R/*	Cga/Tga
Val_B	SC01285A	colorectal	APC	GRCh37	5	112175452	112175452	Nonsense_Mutation	SNP	T	T	A	c.4161T>A	p.Cys1387Ter	p.C1387*	ENST00000457016	16/16	4541/11025	4161/8532	1387/2843	C/*	tgT/tgA
Val_B	SC01286A	colorectal	APC	GRCh37	5	112174096	112174096	Nonsense_Mutation	SNP	C	C	A	c.2805C>A	p.Tyr935Ter	p.Y935*	ENST00000457016	16/16	3185/11025	2805/8532	935/2843	Y/*	taC/taA
Val_B	SC01287A	colorectal	APC	GRCh37	5	112128143	112128143	Nonsense_Mutation	SNP	C	C	T	c.646C>T	p.Arg216Ter	p.R216*	ENST00000457016	7/16	1026/11025	646/8532	216/2843	R/*	Cga/Tga
Val_B	SC01287A	colorectal	APC	GRCh37	5	112128187	112128187	Frame_Shift_Del	DEL	T	T	-	c.690delT	p.Ile231TyrfsTer62	p.I231Yfs*62	ENST00000457016	7/16	1070/11025	690/8532	230/2843	R/X	cgT/cg
Val_B	SC01288A	colorectal	APC	GRCh37	5	112175991	112175991	Nonsense_Mutation	SNP	C	C	A	c.4700C>A	p.Ser1567Ter	p.S1567*	ENST00000457016	16/16	5080/11025	4700/8532	1567/2843	S/*	tCa/tAa
Val_B	SC01288A	colorectal	APC	GRCh37	5	112173898	112173898	Frame_Shift_Del	DEL	T	T	-	c.2607delT	p.Pro870GlnfsTer46	p.P870Qfs*46	ENST00000457016	16/16	2987/11025	2607/8532	869/2843	N/X	aaT/aa
Val_B	SC01289A	colorectal	APC	GRCh37	5	112174925	112174926	Frame_Shift_Ins	INS	-	-	C	c.3635dupC	p.Ser1213PhefsTer4	p.S1213Ffs*4	ENST00000457016	16/16	4014-4015/11025	3634-3635/8532	1212/2843	S/SX	tct/tCct
Val_B	SC01290A	colorectal	APC	GRCh37	5	112175513	112175513	Nonsense_Mutation	SNP	G	G	T	c.4222G>T	p.Glu1408Ter	p.E1408*	ENST00000457016	16/16	4602/11025	4222/8532	1408/2843	E/*	Gaa/Taa
Val_B	SC01290A	colorectal	APC	GRCh37	5	112174874	112174874	Frame_Shift_Del	DEL	T	T	-	c.3586delT	p.Ser1196HisfsTer69	p.S1196Hfs*69	ENST00000457016	16/16	3963/11025	3583/8532	1195/2843	F/X	Ttt/tt
Val_B	SC01292A	colorectal	APC	GRCh37	5	112157672	112157672	Frame_Shift_Del	DEL	T	T	-	c.1392delT	p.His464GlnfsTer3	p.H464Qfs*3	ENST00000457016	11/16	1772/11025	1392/8532	464/2843	H/X	caT/ca
Val_B	SC01292A	colorectal	APC	GRCh37	5	112175208	112175208	Frame_Shift_Del	DEL	A	A	-	c.3919delA	p.Ile1307Ter	p.I1307*	ENST00000457016	16/16	4297/11025	3917/8532	1306/2843	E/X	gAa/ga
Val_B	SC01293A	colorectal	APC	GRCh37	5	112174350	112174378	Frame_Shift_Del	DEL	AACTAGATACACCAATAAATTATAGTCTT	AACTAGATACACCAATAAATTATAGTCTT	-	c.3061_3089delCTAGATACACCAATAAATTATAGTCTTAA	p.Leu1021IlefsTer4	p.L1021Ifs*4	ENST00000457016	16/16	3439-3467/11025	3059-3087/8532	1020-1029/2843	ELDTPINYSL/X	gAACTAGATACACCAATAAATTATAGTCTT/g
Val_B	SC01295A	colorectal	APC	GRCh37	5	112175760	112175761	Frame_Shift_Ins	INS	-	-	T	c.4473dupT	p.Ala1492CysfsTer22	p.A1492Cfs*22	ENST00000457016	16/16	4849-4850/11025	4469-4470/8532	1490/2843	H/HX	cat/caTt
Val_B	SC01295A	colorectal	APC	GRCh37	5	112173624	112173625	Frame_Shift_Ins	INS	-	-	T	c.2336dupT	p.Leu779PhefsTer9	p.L779Ffs*9	ENST00000457016	16/16	2713-2714/11025	2333-2334/8532	778/2843	N/NX	aat/aaTt
Val_B	SC01296A	colorectal	APC	GRCh37	5	112174475	112174475	Nonsense_Mutation	SNP	C	C	T	c.3184C>T	p.Gln1062Ter	p.Q1062*	ENST00000457016	16/16	3564/11025	3184/8532	1062/2843	Q/*	Caa/Taa
Val_B	SC01296A	colorectal	APC	GRCh37	5	112175755	112175756	Frame_Shift_Ins	INS	-	-	T	c.4466dupT	p.Leu1489PhefsTer25	p.L1489Ffs*25	ENST00000457016	16/16	4844-4845/11025	4464-4465/8532	1488-1489/2843	-/X	-/T
Val_B	SC01298A	colorectal	APC	GRCh37	5	112151261	112151261	Nonsense_Mutation	SNP	C	C	T	c.904C>T	p.Arg302Ter	p.R302*	ENST00000457016	9/16	1284/11025	904/8532	302/2843	R/*	Cga/Tga
Val_B	SC01298A	colorectal	APC	GRCh37	5	112175752	112175752	Frame_Shift_Del	DEL	T	T	-	c.4463delT	p.Leu1488TyrfsTer19	p.L1488Yfs*19	ENST00000457016	16/16	4841/11025	4461/8532	1487/2843	T/X	acT/ac
Val_B	SC01302A	colorectal	APC	GRCh37	5	112175255	112175255	Nonsense_Mutation	SNP	G	G	T	c.3964G>T	p.Glu1322Ter	p.E1322*	ENST00000457016	16/16	4344/11025	3964/8532	1322/2843	E/*	Gaa/Taa
Val_B	SC01302A	colorectal	APC	GRCh37	5	112173776	112173777	Frame_Shift_Del	DEL	AC	AC	-	c.2486_2487delCA	p.Thr829SerfsTer14	p.T829Sfs*14	ENST00000457016	16/16	2865-2866/11025	2485-2486/8532	829/2843	T/X	ACa/a
Val_B	SC01307A	colorectal	APC	GRCh37	5	112175303	112175303	Nonsense_Mutation	SNP	C	C	T	c.4012C>T	p.Gln1338Ter	p.Q1338*	ENST00000457016	16/16	4392/11025	4012/8532	1338/2843	Q/*	Cag/Tag
Val_B	SC01308A	colorectal	APC	GRCh37	5	112154992	112154992	Nonsense_Mutation	SNP	G	G	A	c.1263G>A	p.Trp421Ter	p.W421*	ENST00000457016	10/16	1643/11025	1263/8532	421/2843	W/*	tgG/tgA
Val_B	SC01308A	colorectal	APC	GRCh37	5	112175761	112175761	Frame_Shift_Del	DEL	T	T	-	c.4473delT	p.Phe1491LeufsTer16	p.F1491Lfs*16	ENST00000457016	16/16	4850/11025	4470/8532	1490/2843	H/X	caT/ca
Val_B	SC01309A	colorectal	APC	GRCh37	5	112174544	112174544	Frame_Shift_Del	DEL	A	A	-	c.3255delA	p.Lys1085AsnfsTer41	p.K1085Nfs*41	ENST00000457016	16/16	3633/11025	3253/8532	1085/2843	K/X	Aaa/aa
Val_B	SC01309A	colorectal	APC	GRCh37	5	112175475	112175476	Frame_Shift_Ins	INS	-	-	TT	c.4187_4188dupTT	p.Glu1397LeufsTer19	p.E1397Lfs*19	ENST00000457016	16/16	4564-4565/11025	4184-4185/8532	1395/2843	S/SX	agt/agTTt
Val_B	SC01310A	colorectal	APC	GRCh37	5	112173917	112173917	Nonsense_Mutation	SNP	C	C	T	c.2626C>T	p.Arg876Ter	p.R876*	ENST00000457016	16/16	3006/11025	2626/8532	876/2843	R/*	Cga/Tga
Val_B	SC01310A	colorectal	APC	GRCh37	5	112175350	112175351	Frame_Shift_Del	DEL	AT	AT	-	c.4059_4060delAT	p.Glu1353AspfsTer21	p.E1353Dfs*21	ENST00000457016	16/16	4439-4440/11025	4059-4060/8532	1353-1354/2843	EF/DX	gaATtt/gatt
Val_B	SC01312A	colorectal	APC	GRCh37	5	112175480	112175480	Nonsense_Mutation	SNP	G	G	T	c.4189G>T	p.Glu1397Ter	p.E1397*	ENST00000457016	16/16	4569/11025	4189/8532	1397/2843	E/*	Gag/Tag
Val_B	SC01312A	colorectal	APC	GRCh37	5	112174502	112174502	Nonsense_Mutation	SNP	C	C	T	c.3211C>T	p.Gln1071Ter	p.Q1071*	ENST00000457016	16/16	3591/11025	3211/8532	1071/2843	Q/*	Caa/Taa
Val_B	SC01313A	colorectal	APC	GRCh37	5	112173917	112173917	Nonsense_Mutation	SNP	C	C	T	c.2626C>T	p.Arg876Ter	p.R876*	ENST00000457016	16/16	3006/11025	2626/8532	876/2843	R/*	Cga/Tga
Val_B	SC01313A	colorectal	APC	GRCh37	5	112175524	112175524	Frame_Shift_Del	DEL	T	T	-	c.4233delT	p.Ser1411ArgfsTer4	p.S1411Rfs*4	ENST00000457016	16/16	4613/11025	4233/8532	1411/2843	S/X	agT/ag
Val_B	SC01315A	colorectal	APC	GRCh37	5	112175360	112175360	Nonsense_Mutation	SNP	G	G	T	c.4069G>T	p.Gly1357Ter	p.G1357*	ENST00000457016	16/16	4449/11025	4069/8532	1357/2843	G/*	Gga/Tga
Val_B	SC01316A	colorectal	APC	GRCh37	5	112175212	112175216	Frame_Shift_Del	DEL	AAAAG	AAAAG	-	c.3927_3931delAAAGA	p.Glu1309AspfsTer4	p.E1309Dfs*4	ENST00000457016	16/16	4301-4305/11025	3921-3925/8532	1307-1309/2843	IKE/IX	atAAAAGaa/ataa
Val_B	SC01317A	colorectal	APC	GRCh37	5	112173704	112173704	Nonsense_Mutation	SNP	C	C	T	c.2413C>T	p.Arg805Ter	p.R805*	ENST00000457016	16/16	2793/11025	2413/8532	805/2843	R/*	Cga/Tga
Val_B	SC01317A	colorectal	APC	GRCh37	5	112175512	112175512	Frame_Shift_Del	DEL	T	T	-	c.4221delT	p.Ser1407ArgfsTer8	p.S1407Rfs*8	ENST00000457016	16/16	4601/11025	4221/8532	1407/2843	S/X	agT/ag
Non-CRC	TCGA.38.4629.01	lung	RNF43	GRCh37	17	56439904	56439904	Splice_Site	SNP	C	C	G	c.687+1G>C		p.X229_splice	ENST00000584437		-/5575	687/2352	229/783
Non-CRC	TCGA.66.2773.01	lung	RNF43	GRCh37	17	56434896	56434896	Nonsense_Mutation	SNP	C	C	T	c.2241G>A	p.Trp747Ter	p.W747*	ENST00000584437	8/9	4197/5575	2241/2352	747/783	W/*	tgG/tgA
Non-CRC	TCGA.A8.A09Z.01	breast	RNF43	GRCh37	17	56435161	56435161	Frame_Shift_Del	DEL	C	C	-	c.1976delG	p.Gly659ValfsTer41	p.G659Vfs*41	ENST00000584437	8/9	3932/5575	1976/2352	659/783	G/X	gGt/gt
Non-CRC	TCGA.AN.A04D.01	breast	RNF43	GRCh37	17	56435586	56435598	Frame_Shift_Del	DEL	GGGATCCCCTTTA	GGGATCCCCTTTA	-	c.1539_1551delTAAAGGGGATCCC	p.Lys514SerfsTer9	p.K514Sfs*9	ENST00000584437	8/9	3495-3507/5575	1539-1551/2352	513-517/783	PKGDP/X	ccTAAAGGGGATCCC/cc
Non-CRC	TCGA.AP.A051.01	endometrium	RNF43	GRCh37	17	56437556	56437556	Frame_Shift_Del	DEL	C	C	-	c.906delG	p.Trp302CysfsTer117	p.W302Cfs*117	ENST00000584437	7/9	2862/5575	906/2352	302/783	W/X	tgG/tg
Non-CRC	TCGA.AP.A059.01	endometrium	RNF43	GRCh37	17	56435582	56435582	Nonsense_Mutation	SNP	G	G	A	c.1555C>T	p.Arg519Ter	p.R519*	ENST00000584437	8/9	3511/5575	1555/2352	519/783	R/*	Cga/Tga
Non-CRC	TCGA.AP.A0LM.01	endometrium	RNF43	GRCh37	17	56440943	56440943	Nonsense_Mutation	SNP	G	G	A	c.394C>T	p.Arg132Ter	p.R132*	ENST00000584437	3/9	2350/5575	394/2352	132/783	R/*	Cga/Tga
Non-CRC	TCGA.AP.A0LT.01	endometrium	RNF43	GRCh37	17	56492875	56492875	Nonsense_Mutation	SNP	G	G	A	c.64C>T	p.Gln22Ter	p.Q22*	ENST00000584437	1/9	2020/5575	64/2352	22/783	Q/*	Cag/Tag
Non-CRC	TCGA.B5.A11N.01	endometrium	RNF43	GRCh37	17	56436128	56436128	Nonsense_Mutation	SNP	G	G	A	c.1009C>T	p.Arg337Ter	p.R337*	ENST00000584437	8/9	2965/5575	1009/2352	337/783	R/*	Cga/Tga
Non-CRC	TCGA.BH.A18G.01	breast	RNF43	GRCh37	17	56435161	56435161	Frame_Shift_Del	DEL	C	C	-	c.1976delG	p.Gly659ValfsTer41	p.G659Vfs*41	ENST00000584437	8/9	3932/5575	1976/2352	659/783	G/X	gGt/gt
Non-CRC	TCGA.BR.8588.01	stomach	RNF43	GRCh37	17	56438233	56438233	Nonsense_Mutation	SNP	G	G	A	c.760C>T	p.Gln254Ter	p.Q254*	ENST00000584437	6/9	2716/5575	760/2352	254/783	Q/*	Cag/Tag
Non-CRC	TCGA.CG.4469.01	stomach	RNF43	GRCh37	17	56438164	56438164	Nonsense_Mutation	SNP	C	C	A	c.829G>T	p.Glu277Ter	p.E277*	ENST00000584437	6/9	2785/5575	829/2352	277/783	E/*	Gag/Tag
Non-CRC	TCGA.CG.5720.01	stomach	RNF43	GRCh37	17	56435766	56435766	Nonsense_Mutation	SNP	G	G	T	c.1371C>A	p.Tyr457Ter	p.Y457*	ENST00000584437	8/9	3327/5575	1371/2352	457/783	Y/*	taC/taA
Non-CRC	TCGA.CG.5733.01	stomach	RNF43	GRCh37	17	56436149	56436149	Nonsense_Mutation	SNP	G	G	A	c.988C>T	p.Arg330Ter	p.R330*	ENST00000584437	8/9	2944/5575	988/2352	330/783	R/*	Cga/Tga
Non-CRC	TCGA.D1.A17M.01	endometrium	RNF43	GRCh37	17	56440011	56440011	Splice_Site	SNP	T	T	A	c.583-2A>T		p.X195_splice	ENST00000584437		-/5575	583/2352	195/783
Non-CRC	TCGA.EE.A2GJ.06	skin	RNF43	GRCh37	17	56435450	56435450	Nonsense_Mutation	SNP	G	G	A	c.1687C>T	p.Gln563Ter	p.Q563*	ENST00000584437	8/9	3643/5575	1687/2352	563/783	Q/*	Cag/Tag
Non-CRC	TCGA.EJ.7782.01	prostate	RNF43	GRCh37	17	56435189	56435189	Nonsense_Mutation	SNP	G	G	A	c.1948C>T	p.Arg650Ter	p.R650*	ENST00000584437	8/9	3904/5575	1948/2352	650/783	R/*	Cga/Tga
Non-CRC	TCGA.FS.A4FC.06	skin	RNF43	GRCh37	17	56435408	56435408	Nonsense_Mutation	SNP	G	G	A	c.1729C>T	p.Gln577Ter	p.Q577*	ENST00000584437	8/9	3685/5575	1729/2352	577/783	Q/*	Cag/Tag
Non-CRC	TCGA.HT.7690.01	brain	RNF43	GRCh37	17	56435582	56435582	Nonsense_Mutation	SNP	G	G	A	c.1555C>T	p.Arg519Ter	p.R519*	ENST00000584437	8/9	3511/5575	1555/2352	519/783	R/*	Cga/Tga
Non-CRC	TCGA.22.5492.01	lung	APC	GRCh37	5	112154688	112154688	Nonsense_Mutation	SNP	C	C	G	c.959C>G	p.Ser320Ter	p.S320*	ENST00000457016	10/16	1339/11025	959/8532	320/2843	S/*	tCa/tGa
Non-CRC	TCGA.23.1022.01	ovary	APC	GRCh37	5	112177305	112177305	Nonsense_Mutation	SNP	C	C	G	c.6014C>G	p.Ser2005Ter	p.S2005*	ENST00000457016	16/16	6394/11025	6014/8532	2005/2843	S/*	tCa/tGa
Non-CRC	TCGA.49.4507.01	lung	APC	GRCh37	5	112178162	112178162	Nonsense_Mutation	SNP	C	C	T	c.6871C>T	p.Gln2291Ter	p.Q2291*	ENST00000457016	16/16	7251/11025	6871/8532	2291/2843	Q/*	Caa/Taa
Non-CRC	TCGA.50.5049.01	lung	APC	GRCh37	5	112111325	112111325	Splice_Site	SNP	G	G	T	c.423-1G>T		p.X141_splice	ENST00000457016		-/11025	423/8532	141/2843
Non-CRC	TCGA.85.6560.01	lung	APC	GRCh37	5	112174043	112174043	Nonsense_Mutation	SNP	G	G	T	c.2752G>T	p.Glu918Ter	p.E918*	ENST00000457016	16/16	3132/11025	2752/8532	918/2843	E/*	Gag/Tag
Non-CRC	TCGA.A7.A3IZ.01	breast	APC	GRCh37	5	112155003	112155006	Frame_Shift_Del	DEL	AAGC	AAGC	-	c.1274_1277delAAGC	p.Glu425ValfsTer28	p.E425Vfs*28	ENST00000457016	10/16	1654-1657/11025	1274-1277/8532	425-426/2843	EA/X	gAAGCt/gt
Non-CRC	TCGA.AN.A046.01	breast	APC	GRCh37	5	112102990	112102990	Nonsense_Mutation	SNP	G	G	T	c.325G>T	p.Glu109Ter	p.E109*	ENST00000457016	4/16	705/11025	325/8532	109/2843	E/*	Gag/Tag
Non-CRC	TCGA.AN.A046.01	breast	APC	GRCh37	5	112177959	112177959	Nonsense_Mutation	SNP	C	C	A	c.6668C>A	p.Ser2223Ter	p.S2223*	ENST00000457016	16/16	7048/11025	6668/8532	2223/2843	S/*	tCa/tAa
Non-CRC	TCGA.AP.A051.01	endometrium	APC	GRCh37	5	112128191	112128191	Nonsense_Mutation	SNP	C	C	T	c.694C>T	p.Arg232Ter	p.R232*	ENST00000457016	7/16	1074/11025	694/8532	232/2843	R/*	Cga/Tga
Non-CRC	TCGA.AP.A056.01	endometrium	APC	GRCh37	5	112177901	112177901	Nonsense_Mutation	SNP	C	C	T	c.6610C>T	p.Arg2204Ter	p.R2204*	ENST00000457016	16/16	6990/11025	6610/8532	2204/2843	R/*	Cga/Tga
Non-CRC	TCGA.AP.A059.01	endometrium	APC	GRCh37	5	112177901	112177901	Nonsense_Mutation	SNP	C	C	T	c.6610C>T	p.Arg2204Ter	p.R2204*	ENST00000457016	16/16	6990/11025	6610/8532	2204/2843	R/*	Cga/Tga
Non-CRC	TCGA.AP.A0LM.01	endometrium	APC	GRCh37	5	112174631	112174631	Nonsense_Mutation	SNP	C	C	T	c.3340C>T	p.Arg1114Ter	p.R1114*	ENST00000457016	16/16	3720/11025	3340/8532	1114/2843	R/*	Cga/Tga
Non-CRC	TCGA.AX.A05Z.01	endometrium	APC	GRCh37	5	112175921	112175921	Nonsense_Mutation	SNP	G	G	T	c.4630G>T	p.Glu1544Ter	p.E1544*	ENST00000457016	16/16	5010/11025	4630/8532	1544/2843	E/*	Gaa/Taa
Non-CRC	TCGA.AX.A05Z.01	endometrium	APC	GRCh37	5	112173572	112173572	Nonsense_Mutation	SNP	G	G	T	c.2281G>T	p.Glu761Ter	p.E761*	ENST00000457016	16/16	2661/11025	2281/8532	761/2843	E/*	Gaa/Taa
Non-CRC	TCGA.AX.A05Z.01	endometrium	APC	GRCh37	5	112103071	112103071	Nonsense_Mutation	SNP	G	G	T	c.406G>T	p.Glu136Ter	p.E136*	ENST00000457016	4/16	786/11025	406/8532	136/2843	E/*	Gaa/Taa
Non-CRC	TCGA.AX.A060.01	endometrium	APC	GRCh37	5	112162825	112162825	Nonsense_Mutation	SNP	G	G	T	c.1429G>T	p.Glu477Ter	p.E477*	ENST00000457016	12/16	1809/11025	1429/8532	477/2843	E/*	Gaa/Taa
Non-CRC	TCGA.AX.A0J0.01	endometrium	APC	GRCh37	5	112177049	112177049	Nonsense_Mutation	SNP	C	C	T	c.5758C>T	p.Arg1920Ter	p.R1920*	ENST00000457016	16/16	6138/11025	5758/8532	1920/2843	R/*	Cga/Tga
Non-CRC	TCGA.AX.A2HF.01	endometrium	APC	GRCh37	5	112154723	112154723	Nonsense_Mutation	SNP	C	C	T	c.994C>T	p.Arg332Ter	p.R332*	ENST00000457016	10/16	1374/11025	994/8532	332/2843	R/*	Cga/Tga
Non-CRC	TCGA.B5.A0JY.01	endometrium	APC	GRCh37	5	112177901	112177901	Nonsense_Mutation	SNP	C	C	T	c.6610C>T	p.Arg2204Ter	p.R2204*	ENST00000457016	16/16	6990/11025	6610/8532	2204/2843	R/*	Cga/Tga
Non-CRC	TCGA.B5.A0JY.01	endometrium	APC	GRCh37	5	112178000	112178000	Nonsense_Mutation	SNP	C	C	T	c.6709C>T	p.Arg2237Ter	p.R2237*	ENST00000457016	16/16	7089/11025	6709/8532	2237/2843	R/*	Cga/Tga
Non-CRC	TCGA.B6.A0IM.01	breast	APC	GRCh37	5	112175144	112175144	Frame_Shift_Del	DEL	G	G	-	c.3853delG	p.Asp1285MetfsTer3	p.D1285Mfs*3	ENST00000457016	16/16	4233/11025	3853/8532	1285/2843	D/X	Gat/at
Non-CRC	TCGA.BG.A186.01	endometrium	APC	GRCh37	5	112175618	112175618	Frame_Shift_Del	DEL	C	C	-	c.4328delC	p.Pro1443LeufsTer30	p.P1443Lfs*30	ENST00000457016	16/16	4707/11025	4327/8532	1443/2843	P/X	Cct/ct
Non-CRC	TCGA.BR.4267.01	stomach	APC	GRCh37	5	112174631	112174631	Nonsense_Mutation	SNP	C	C	T	c.3340C>T	p.Arg1114Ter	p.R1114*	ENST00000457016	16/16	3720/11025	3340/8532	1114/2843	R/*	Cga/Tga
Non-CRC	TCGA.BR.6565.01	stomach	APC	GRCh37	5	112177901	112177901	Nonsense_Mutation	SNP	C	C	T	c.6610C>T	p.Arg2204Ter	p.R2204*	ENST00000457016	16/16	6990/11025	6610/8532	2204/2843	R/*	Cga/Tga
Non-CRC	TCGA.BR.7197.01	stomach	APC	GRCh37	5	112151261	112151261	Nonsense_Mutation	SNP	C	C	T	c.904C>T	p.Arg302Ter	p.R302*	ENST00000457016	9/16	1284/11025	904/8532	302/2843	R/*	Cga/Tga
Non-CRC	TCGA.BR.7703.01	stomach	APC	GRCh37	5	112162834	112162834	Nonsense_Mutation	SNP	C	C	T	c.1438C>T	p.Gln480Ter	p.Q480*	ENST00000457016	12/16	1818/11025	1438/8532	480/2843	Q/*	Caa/Taa
Non-CRC	TCGA.BR.8680.01	stomach	APC	GRCh37	5	112177901	112177901	Nonsense_Mutation	SNP	C	C	T	c.6610C>T	p.Arg2204Ter	p.R2204*	ENST00000457016	16/16	6990/11025	6610/8532	2204/2843	R/*	Cga/Tga
Non-CRC	TCGA.BR.8680.01	stomach	APC	GRCh37	5	112174916	112174916	Nonsense_Mutation	SNP	G	G	T	c.3625G>T	p.Glu1209Ter	p.E1209*	ENST00000457016	16/16	4005/11025	3625/8532	1209/2843	E/*	Gaa/Taa
Non-CRC	TCGA.BR.8680.01	stomach	APC	GRCh37	5	112151261	112151261	Nonsense_Mutation	SNP	C	C	T	c.904C>T	p.Arg302Ter	p.R302*	ENST00000457016	9/16	1284/11025	904/8532	302/2843	R/*	Cga/Tga
Non-CRC	TCGA.BR.8680.01	stomach	APC	GRCh37	5	112175639	112175639	Nonsense_Mutation	SNP	C	C	T	c.4348C>T	p.Arg1450Ter	p.R1450*	ENST00000457016	16/16	4728/11025	4348/8532	1450/2843	R/*	Cga/Tga
Non-CRC	TCGA.BR.A452.01	stomach	APC	GRCh37	5	112111436	112111436	Splice_Site	SNP	T	T	G	c.531+2T>G		p.X177_splice	ENST00000457016		-/11025	531/8532	177/2843
Non-CRC	TCGA.BS.A0U8.01	endometrium	APC	GRCh37	5	112175273	112175273	Nonsense_Mutation	SNP	C	C	T	c.3982C>T	p.Gln1328Ter	p.Q1328*	ENST00000457016	16/16	4362/11025	3982/8532	1328/2843	Q/*	Cag/Tag
Non-CRC	TCGA.BS.A0UF.01	endometrium	APC	GRCh37	5	112151261	112151261	Nonsense_Mutation	SNP	C	C	T	c.904C>T	p.Arg302Ter	p.R302*	ENST00000457016	9/16	1284/11025	904/8532	302/2843	R/*	Cga/Tga
Non-CRC	TCGA.BS.A0UV.01	endometrium	APC	GRCh37	5	112177901	112177901	Nonsense_Mutation	SNP	C	C	T	c.6610C>T	p.Arg2204Ter	p.R2204*	ENST00000457016	16/16	6990/11025	6610/8532	2204/2843	R/*	Cga/Tga
Non-CRC	TCGA.CD.8536.01	stomach	APC	GRCh37	5	112176017	112176017	Nonsense_Mutation	SNP	G	G	T	c.4726G>T	p.Glu1576Ter	p.E1576*	ENST00000457016	16/16	5106/11025	4726/8532	1576/2843	E/*	Gaa/Taa
Non-CRC	TCGA.CG.4476.01	stomach	APC	GRCh37	5	112174682	112174682	Nonsense_Mutation	SNP	C	C	T	c.3391C>T	p.Gln1131Ter	p.Q1131*	ENST00000457016	16/16	3771/11025	3391/8532	1131/2843	Q/*	Caa/Taa
Non-CRC	TCGA.CG.4476.01	stomach	APC	GRCh37	5	112175639	112175639	Nonsense_Mutation	SNP	C	C	T	c.4348C>T	p.Arg1450Ter	p.R1450*	ENST00000457016	16/16	4728/11025	4348/8532	1450/2843	R/*	Cga/Tga
Non-CRC	TCGA.D1.A16Y.01	endometrium	APC	GRCh37	5	112175639	112175639	Nonsense_Mutation	SNP	C	C	T	c.4348C>T	p.Arg1450Ter	p.R1450*	ENST00000457016	16/16	4728/11025	4348/8532	1450/2843	R/*	Cga/Tga
Non-CRC	TCGA.D1.A16Y.01	endometrium	APC	GRCh37	5	112173917	112173917	Nonsense_Mutation	SNP	C	C	T	c.2626C>T	p.Arg876Ter	p.R876*	ENST00000457016	16/16	3006/11025	2626/8532	876/2843	R/*	Cga/Tga
Non-CRC	TCGA.D8.A1XK.01	breast	APC	GRCh37	5	112179043	112179043	Frame_Shift_Del	DEL	A	A	-	c.7756delA	p.Ser2586ValfsTer7	p.S2586Vfs*7	ENST00000457016	16/16	8132/11025	7752/8532	2584/2843	A/X	gcA/gc
Non-CRC	TCGA.DD.A3A8.01	liver	APC	GRCh37	5	112111380	112111380	Nonsense_Mutation	SNP	C	C	G	c.477C>G	p.Tyr159Ter	p.Y159*	ENST00000457016	5/16	857/11025	477/8532	159/2843	Y/*	taC/taG
Non-CRC	TCGA.DD.A4NP.01	liver	APC	GRCh37	5	112111324	112111324	Splice_Site	SNP	A	A	G	c.423-2A>G		p.X141_splice	ENST00000457016		-/11025	423/8532	141/2843
Non-CRC	TCGA.E2.A1LK.01	breast	APC	GRCh37	5	112154710	112154710	Frame_Shift_Del	DEL	G	G	-	c.982delG	p.Asp328MetfsTer8	p.D328Mfs*8	ENST00000457016	10/16	1361/11025	981/8532	327/2843	K/X	aaG/aa
Non-CRC	TCGA.EE.A17X.06	skin	APC	GRCh37	5	112174607	112174607	Nonsense_Mutation	SNP	G	G	T	c.3316G>T	p.Gly1106Ter	p.G1106*	ENST00000457016	16/16	3696/11025	3316/8532	1106/2843	G/*	Gga/Tga
Non-CRC	TCGA.EE.A2GT.06	skin	APC	GRCh37	5	112176863	112176863	Nonsense_Mutation	SNP	C	C	T	c.5572C>T	p.Arg1858Ter	p.R1858*	ENST00000457016	16/16	5952/11025	5572/8532	1858/2843	R/*	Cga/Tga
Non-CRC	TCGA.EL.A3CX.01	thyroid	APC	GRCh37	5	112116592	112116592	Nonsense_Mutation	SNP	C	C	T	c.637C>T	p.Arg213Ter	p.R213*	ENST00000457016	6/16	1017/11025	637/8532	213/2843	R/*	Cga/Tga
Non-CRC	TCGA.ER.A198.06	skin	APC	GRCh37	5	112174490	112174490	Nonsense_Mutation	SNP	C	C	T	c.3199C>T	p.Gln1067Ter	p.Q1067*	ENST00000457016	16/16	3579/11025	3199/8532	1067/2843	Q/*	Caa/Taa
Non-CRC	TCGA.F1.6875.01	stomach	APC	GRCh37	5	112162891	112162891	Nonsense_Mutation	SNP	C	C	T	c.1495C>T	p.Arg499Ter	p.R499*	ENST00000457016	12/16	1875/11025	1495/8532	499/2843	R/*	Cga/Tga
Non-CRC	TCGA.FS.A1ZB.06	skin	APC	GRCh37	5	112175912	112175912	Nonsense_Mutation	SNP	C	C	T	c.4621C>T	p.Gln1541Ter	p.Q1541*	ENST00000457016	16/16	5001/11025	4621/8532	1541/2843	Q/*	Cag/Tag
Non-CRC	TCGA.FS.A1ZG.06	skin	APC	GRCh37	5	112173801	112173801	Nonsense_Mutation	SNP	C	C	G	c.2510C>G	p.Ser837Ter	p.S837*	ENST00000457016	16/16	2890/11025	2510/8532	837/2843	S/*	tCa/tGa
Non-CRC	TCGA.KR.A7K7.01	liver	APC	GRCh37	5	112174286	112174286	Nonsense_Mutation	SNP	C	C	T	c.2995C>T	p.Gln999Ter	p.Q999*	ENST00000457016	16/16	3375/11025	2995/8532	999/2843	Q/*	Caa/Taa
Non-CRC	TCGA.Q1.A73O.01	cervix	APC	GRCh37	5	112136975	112136975	Splice_Site	SNP	G	G	A	c.730-1G>A		p.X244_splice	ENST00000457016		-/11025	730/8532	244/2843
Non-CRC	TCGA.05.4389.01	lung	CTNNB1	GRCh37	3	41266124	41266124	Missense_Mutation	SNP	A	A	G	c.121A>G	p.Thr41Ala	p.T41A	ENST00000349496	3/15	401/3729	121/2346	41/781	T/A	Acc/Gcc
Non-CRC	TCGA.05.4422.01	lung	CTNNB1	GRCh37	3	41266113	41266113	Missense_Mutation	SNP	C	C	T	c.110C>T	p.Ser37Phe	p.S37F	ENST00000349496	3/15	390/3729	110/2346	37/781	S/F	tCt/tTt
Non-CRC	TCGA.18.3421.01	lung	CTNNB1	GRCh37	3	41266094	41266094	Missense_Mutation	SNP	C	C	A	c.91C>A	p.Leu31Met	p.L31M	ENST00000349496	3/15	371/3729	91/2346	31/781	L/M	Ctg/Atg
Non-CRC	TCGA.67.3771.01	lung	CTNNB1	GRCh37	3	41266113	41266113	Missense_Mutation	SNP	C	C	G	c.110C>G	p.Ser37Cys	p.S37C	ENST00000349496	3/15	390/3729	110/2346	37/781	S/C	tCt/tGt
Non-CRC	TCGA.78.7158.01	lung	CTNNB1	GRCh37	3	41266113	41266113	Missense_Mutation	SNP	C	C	T	c.110C>T	p.Ser37Phe	p.S37F	ENST00000349496	3/15	390/3729	110/2346	37/781	S/F	tCt/tTt
Non-CRC	TCGA.A5.A0GI.01	endometrium	CTNNB1	GRCh37	3	41266125	41266125	Missense_Mutation	SNP	C	C	T	c.122C>T	p.Thr41Ile	p.T41I	ENST00000349496	3/15	402/3729	122/2346	41/781	T/I	aCc/aTc
Non-CRC	TCGA.A5.A0GM.01	endometrium	CTNNB1	GRCh37	3	41266113	41266113	Missense_Mutation	SNP	C	C	T	c.110C>T	p.Ser37Phe	p.S37F	ENST00000349496	3/15	390/3729	110/2346	37/781	S/F	tCt/tTt
Non-CRC	TCGA.A5.A0GM.01	endometrium	CTNNB1	GRCh37	3	41266100	41266100	Missense_Mutation	SNP	T	T	C	c.97T>C	p.Ser33Pro	p.S33P	ENST00000349496	3/15	377/3729	97/2346	33/781	S/P	Tct/Cct
Non-CRC	TCGA.A5.A0GN.01	endometrium	CTNNB1	GRCh37	3	41266103	41266103	Missense_Mutation	SNP	G	G	A	c.100G>A	p.Gly34Arg	p.G34R	ENST00000349496	3/15	380/3729	100/2346	34/781	G/R	Gga/Aga
Non-CRC	TCGA.A5.A0GU.01	endometrium	CTNNB1	GRCh37	3	41266101	41266101	Missense_Mutation	SNP	C	C	T	c.98C>T	p.Ser33Phe	p.S33F	ENST00000349496	3/15	378/3729	98/2346	33/781	S/F	tCt/tTt
Non-CRC	TCGA.A5.A0GV.01	endometrium	CTNNB1	GRCh37	3	41266097	41266097	Missense_Mutation	SNP	G	G	A	c.94G>A	p.Asp32Asn	p.D32N	ENST00000349496	3/15	374/3729	94/2346	32/781	D/N	Gac/Aac
Non-CRC	TCGA.A5.A0GW.01	endometrium	CTNNB1	GRCh37	3	41266101	41266101	Missense_Mutation	SNP	C	C	T	c.98C>T	p.Ser33Phe	p.S33F	ENST00000349496	3/15	378/3729	98/2346	33/781	S/F	tCt/tTt
Non-CRC	TCGA.A5.A0GX.01	endometrium	CTNNB1	GRCh37	3	41266097	41266097	Missense_Mutation	SNP	G	G	T	c.94G>T	p.Asp32Tyr	p.D32Y	ENST00000349496	3/15	374/3729	94/2346	32/781	D/Y	Gac/Tac
Non-CRC	TCGA.A5.A0R9.01	endometrium	CTNNB1	GRCh37	3	41266101	41266101	Missense_Mutation	SNP	C	C	G	c.98C>G	p.Ser33Cys	p.S33C	ENST00000349496	3/15	378/3729	98/2346	33/781	S/C	tCt/tGt
Non-CRC	TCGA.A5.A0VO.01	endometrium	CTNNB1	GRCh37	3	41266137	41266137	Missense_Mutation	SNP	C	C	T	c.134C>T	p.Ser45Phe	p.S45F	ENST00000349496	3/15	414/3729	134/2346	45/781	S/F	tCt/tTt
Non-CRC	TCGA.A5.A0VQ.01	endometrium	CTNNB1	GRCh37	3	41266104	41266104	Missense_Mutation	SNP	G	G	A	c.101G>A	p.Gly34Glu	p.G34E	ENST00000349496	3/15	381/3729	101/2346	34/781	G/E	gGa/gAa
Non-CRC	TCGA.AP.A05N.01	endometrium	CTNNB1	GRCh37	3	41266101	41266101	Missense_Mutation	SNP	C	C	T	c.98C>T	p.Ser33Phe	p.S33F	ENST00000349496	3/15	378/3729	98/2346	33/781	S/F	tCt/tTt
Non-CRC	TCGA.AP.A0LE.01	endometrium	CTNNB1	GRCh37	3	41266112	41266112	Missense_Mutation	SNP	T	T	C	c.109T>C	p.Ser37Pro	p.S37P	ENST00000349496	3/15	389/3729	109/2346	37/781	S/P	Tct/Cct
Non-CRC	TCGA.AP.A0LG.01	endometrium	CTNNB1	GRCh37	3	41266112	41266112	Missense_Mutation	SNP	T	T	G	c.109T>G	p.Ser37Ala	p.S37A	ENST00000349496	3/15	389/3729	109/2346	37/781	S/A	Tct/Gct
Non-CRC	TCGA.AP.A0LJ.01	endometrium	CTNNB1	GRCh37	3	41266113	41266113	Missense_Mutation	SNP	C	C	G	c.110C>G	p.Ser37Cys	p.S37C	ENST00000349496	3/15	390/3729	110/2346	37/781	S/C	tCt/tGt
Non-CRC	TCGA.AP.A0LL.01	endometrium	CTNNB1	GRCh37	3	41266103	41266103	Missense_Mutation	SNP	G	G	C	c.100G>C	p.Gly34Arg	p.G34R	ENST00000349496	3/15	380/3729	100/2346	34/781	G/R	Gga/Cga
Non-CRC	TCGA.AP.A0LN.01	endometrium	CTNNB1	GRCh37	3	41266101	41266101	Missense_Mutation	SNP	C	C	A	c.98C>A	p.Ser33Tyr	p.S33Y	ENST00000349496	3/15	378/3729	98/2346	33/781	S/Y	tCt/tAt
Non-CRC	TCGA.AP.A0LV.01	endometrium	CTNNB1	GRCh37	3	41266098	41266098	Missense_Mutation	SNP	A	A	G	c.95A>G	p.Asp32Gly	p.D32G	ENST00000349496	3/15	375/3729	95/2346	32/781	D/G	gAc/gGc
Non-CRC	TCGA.AX.A05T.01	endometrium	CTNNB1	GRCh37	3	41266101	41266101	Missense_Mutation	SNP	C	C	T	c.98C>T	p.Ser33Phe	p.S33F	ENST00000349496	3/15	378/3729	98/2346	33/781	S/F	tCt/tTt
Non-CRC	TCGA.AX.A05U.01	endometrium	CTNNB1	GRCh37	3	41266097	41266097	Missense_Mutation	SNP	G	G	A	c.94G>A	p.Asp32Asn	p.D32N	ENST00000349496	3/15	374/3729	94/2346	32/781	D/N	Gac/Aac
Non-CRC	TCGA.AX.A05W.01	endometrium	CTNNB1	GRCh37	3	41266104	41266104	Missense_Mutation	SNP	G	G	A	c.101G>A	p.Gly34Glu	p.G34E	ENST00000349496	3/15	381/3729	101/2346	34/781	G/E	gGa/gAa
Non-CRC	TCGA.AX.A062.01	endometrium	CTNNB1	GRCh37	3	41266101	41266101	Missense_Mutation	SNP	C	C	G	c.98C>G	p.Ser33Cys	p.S33C	ENST00000349496	3/15	378/3729	98/2346	33/781	S/C	tCt/tGt
Non-CRC	TCGA.AX.A0IS.01	endometrium	CTNNB1	GRCh37	3	41266113	41266113	Missense_Mutation	SNP	C	C	G	c.110C>G	p.Ser37Cys	p.S37C	ENST00000349496	3/15	390/3729	110/2346	37/781	S/C	tCt/tGt
Non-CRC	TCGA.AX.A0J0.01	endometrium	CTNNB1	GRCh37	3	41266113	41266113	Missense_Mutation	SNP	C	C	T	c.110C>T	p.Ser37Phe	p.S37F	ENST00000349496	3/15	390/3729	110/2346	37/781	S/F	tCt/tTt
Non-CRC	TCGA.B5.A0JT.01	endometrium	CTNNB1	GRCh37	3	41266101	41266101	Missense_Mutation	SNP	C	C	A	c.98C>A	p.Ser33Tyr	p.S33Y	ENST00000349496	3/15	378/3729	98/2346	33/781	S/Y	tCt/tAt
Non-CRC	TCGA.B5.A0JY.01	endometrium	CTNNB1	GRCh37	3	41266097	41266097	Missense_Mutation	SNP	G	G	A	c.94G>A	p.Asp32Asn	p.D32N	ENST00000349496	3/15	374/3729	94/2346	32/781	D/N	Gac/Aac
Non-CRC	TCGA.B5.A0K0.01	endometrium	CTNNB1	GRCh37	3	41266113	41266113	Missense_Mutation	SNP	C	C	G	c.110C>G	p.Ser37Cys	p.S37C	ENST00000349496	3/15	390/3729	110/2346	37/781	S/C	tCt/tGt
Non-CRC	TCGA.B5.A0K6.01	endometrium	CTNNB1	GRCh37	3	41266097	41266097	Missense_Mutation	SNP	G	G	T	c.94G>T	p.Asp32Tyr	p.D32Y	ENST00000349496	3/15	374/3729	94/2346	32/781	D/Y	Gac/Tac
Non-CRC	TCGA.B5.A0K7.01	endometrium	CTNNB1	GRCh37	3	41266101	41266101	Missense_Mutation	SNP	C	C	A	c.98C>A	p.Ser33Tyr	p.S33Y	ENST00000349496	3/15	378/3729	98/2346	33/781	S/Y	tCt/tAt
Non-CRC	TCGA.B5.A11F.01	endometrium	CTNNB1	GRCh37	3	41266103	41266103	Missense_Mutation	SNP	G	G	A	c.100G>A	p.Gly34Arg	p.G34R	ENST00000349496	3/15	380/3729	100/2346	34/781	G/R	Gga/Aga
Non-CRC	TCGA.B5.A11U.01	endometrium	CTNNB1	GRCh37	3	41266125	41266125	Missense_Mutation	SNP	C	C	T	c.122C>T	p.Thr41Ile	p.T41I	ENST00000349496	3/15	402/3729	122/2346	41/781	T/I	aCc/aTc
Non-CRC	TCGA.B5.A11V.01	endometrium	CTNNB1	GRCh37	3	41266112	41266112	Missense_Mutation	SNP	T	T	G	c.109T>G	p.Ser37Ala	p.S37A	ENST00000349496	3/15	389/3729	109/2346	37/781	S/A	Tct/Gct
Non-CRC	TCGA.B5.A11X.01	endometrium	CTNNB1	GRCh37	3	41266100	41266100	Missense_Mutation	SNP	T	T	C	c.97T>C	p.Ser33Pro	p.S33P	ENST00000349496	3/15	377/3729	97/2346	33/781	S/P	Tct/Cct
Non-CRC	TCGA.B5.A11Z.01	endometrium	CTNNB1	GRCh37	3	41266124	41266124	Missense_Mutation	SNP	A	A	G	c.121A>G	p.Thr41Ala	p.T41A	ENST00000349496	3/15	401/3729	121/2346	41/781	T/A	Acc/Gcc
Non-CRC	TCGA.B5.A121.01	endometrium	CTNNB1	GRCh37	3	41266137	41266137	Missense_Mutation	SNP	C	C	G	c.134C>G	p.Ser45Cys	p.S45C	ENST00000349496	3/15	414/3729	134/2346	45/781	S/C	tCt/tGt
Non-CRC	TCGA.BC.A10U.01	liver	CTNNB1	GRCh37	3	41266137	41266137	Missense_Mutation	SNP	C	C	T	c.134C>T	p.Ser45Phe	p.S45F	ENST00000349496	3/15	414/3729	134/2346	45/781	S/F	tCt/tTt
Non-CRC	TCGA.BC.A69H.01	liver	CTNNB1	GRCh37	3	41274909	41274909	Missense_Mutation	SNP	A	A	T	c.1159A>T	p.Asn387Tyr	p.N387Y	ENST00000349496	8/15	1439/3729	1159/2346	387/781	N/Y	Aat/Tat
Non-CRC	TCGA.BG.A0LW.01	endometrium	CTNNB1	GRCh37	3	41266113	41266113	Missense_Mutation	SNP	C	C	G	c.110C>G	p.Ser37Cys	p.S37C	ENST00000349496	3/15	390/3729	110/2346	37/781	S/C	tCt/tGt
Non-CRC	TCGA.BG.A0M3.01	endometrium	CTNNB1	GRCh37	3	41266113	41266113	Missense_Mutation	SNP	C	C	G	c.110C>G	p.Ser37Cys	p.S37C	ENST00000349496	3/15	390/3729	110/2346	37/781	S/C	tCt/tGt
Non-CRC	TCGA.BG.A0MG.01	endometrium	CTNNB1	GRCh37	3	41266113	41266113	Missense_Mutation	SNP	C	C	T	c.110C>T	p.Ser37Phe	p.S37F	ENST00000349496	3/15	390/3729	110/2346	37/781	S/F	tCt/tTt
Non-CRC	TCGA.BG.A0MI.01	endometrium	CTNNB1	GRCh37	3	41266112	41266112	Missense_Mutation	SNP	T	T	C	c.109T>C	p.Ser37Pro	p.S37P	ENST00000349496	3/15	389/3729	109/2346	37/781	S/P	Tct/Cct
Non-CRC	TCGA.BG.A0MO.01	endometrium	CTNNB1	GRCh37	3	41266101	41266101	Missense_Mutation	SNP	C	C	G	c.98C>G	p.Ser33Cys	p.S33C	ENST00000349496	3/15	378/3729	98/2346	33/781	S/C	tCt/tGt
Non-CRC	TCGA.BG.A0MU.01	endometrium	CTNNB1	GRCh37	3	41266103	41266103	Missense_Mutation	SNP	G	G	A	c.100G>A	p.Gly34Arg	p.G34R	ENST00000349496	3/15	380/3729	100/2346	34/781	G/R	Gga/Aga
Non-CRC	TCGA.BG.A0VT.01	endometrium	CTNNB1	GRCh37	3	41266113	41266113	Missense_Mutation	SNP	C	C	T	c.110C>T	p.Ser37Phe	p.S37F	ENST00000349496	3/15	390/3729	110/2346	37/781	S/F	tCt/tTt
Non-CRC	TCGA.BG.A0VX.01	endometrium	CTNNB1	GRCh37	3	41266097	41266097	Missense_Mutation	SNP	G	G	A	c.94G>A	p.Asp32Asn	p.D32N	ENST00000349496	3/15	374/3729	94/2346	32/781	D/N	Gac/Aac
Non-CRC	TCGA.BG.A0W2.01	endometrium	CTNNB1	GRCh37	3	41266097	41266097	Missense_Mutation	SNP	G	G	T	c.94G>T	p.Asp32Tyr	p.D32Y	ENST00000349496	3/15	374/3729	94/2346	32/781	D/Y	Gac/Tac
Non-CRC	TCGA.BG.A187.01	endometrium	CTNNB1	GRCh37	3	41266125	41266125	Missense_Mutation	SNP	C	C	T	c.122C>T	p.Thr41Ile	p.T41I	ENST00000349496	3/15	402/3729	122/2346	41/781	T/I	aCc/aTc
Non-CRC	TCGA.BK.A0CB.01	endometrium	CTNNB1	GRCh37	3	41266098	41266098	Missense_Mutation	SNP	A	A	G	c.95A>G	p.Asp32Gly	p.D32G	ENST00000349496	3/15	375/3729	95/2346	32/781	D/G	gAc/gGc
Non-CRC	TCGA.BL.A3JM.01	urinary tract	CTNNB1	GRCh37	3	41266113	41266113	Missense_Mutation	SNP	C	C	G	c.110C>G	p.Ser37Cys	p.S37C	ENST00000349496	3/15	390/3729	110/2346	37/781	S/C	tCt/tGt
Non-CRC	TCGA.BR.8589.01	stomach	CTNNB1	GRCh37	3	41266097	41266097	Missense_Mutation	SNP	G	G	C	c.94G>C	p.Asp32His	p.D32H	ENST00000349496	3/15	374/3729	94/2346	32/781	D/H	Gac/Cac
Non-CRC	TCGA.BR.A4J6.01	stomach	CTNNB1	GRCh37	3	41266103	41266103	Missense_Mutation	SNP	G	G	A	c.100G>A	p.Gly34Arg	p.G34R	ENST00000349496	3/15	380/3729	100/2346	34/781	G/R	Gga/Aga
Non-CRC	TCGA.BS.A0T9.01	endometrium	CTNNB1	GRCh37	3	41266097	41266097	Missense_Mutation	SNP	G	G	A	c.94G>A	p.Asp32Asn	p.D32N	ENST00000349496	3/15	374/3729	94/2346	32/781	D/N	Gac/Aac
Non-CRC	TCGA.BS.A0TG.01	endometrium	CTNNB1	GRCh37	3	41266137	41266137	Missense_Mutation	SNP	C	C	T	c.134C>T	p.Ser45Phe	p.S45F	ENST00000349496	3/15	414/3729	134/2346	45/781	S/F	tCt/tTt
Non-CRC	TCGA.BS.A0TI.01	endometrium	CTNNB1	GRCh37	3	41266113	41266113	Missense_Mutation	SNP	C	C	G	c.110C>G	p.Ser37Cys	p.S37C	ENST00000349496	3/15	390/3729	110/2346	37/781	S/C	tCt/tGt
Non-CRC	TCGA.BS.A0UJ.01	endometrium	CTNNB1	GRCh37	3	41266125	41266125	Missense_Mutation	SNP	C	C	T	c.122C>T	p.Thr41Ile	p.T41I	ENST00000349496	3/15	402/3729	122/2346	41/781	T/I	aCc/aTc
Non-CRC	TCGA.BS.A0UT.01	endometrium	CTNNB1	GRCh37	3	41266101	41266101	Missense_Mutation	SNP	C	C	G	c.98C>G	p.Ser33Cys	p.S33C	ENST00000349496	3/15	378/3729	98/2346	33/781	S/C	tCt/tGt
Non-CRC	TCGA.BS.A0V7.01	endometrium	CTNNB1	GRCh37	3	41266112	41266112	Missense_Mutation	SNP	T	T	G	c.109T>G	p.Ser37Ala	p.S37A	ENST00000349496	3/15	389/3729	109/2346	37/781	S/A	Tct/Gct
Non-CRC	TCGA.BS.A0WQ.01	endometrium	CTNNB1	GRCh37	3	41266104	41266104	Missense_Mutation	SNP	G	G	T	c.101G>T	p.Gly34Val	p.G34V	ENST00000349496	3/15	381/3729	101/2346	34/781	G/V	gGa/gTa
Non-CRC	TCGA.BW.A5NQ.01	liver	CTNNB1	GRCh37	3	41266113	41266113	Missense_Mutation	SNP	C	C	T	c.110C>T	p.Ser37Phe	p.S37F	ENST00000349496	3/15	390/3729	110/2346	37/781	S/F	tCt/tTt
Non-CRC	TCGA.CC.5262.01	liver	CTNNB1	GRCh37	3	41274899	41274899	Missense_Mutation	SNP	G	G	C	c.1149G>C	p.Trp383Cys	p.W383C	ENST00000349496	8/15	1429/3729	1149/2346	383/781	W/C	tgG/tgC
Non-CRC	TCGA.CC.A7IK.01	liver	CTNNB1	GRCh37	3	41266098	41266098	Missense_Mutation	SNP	A	A	T	c.95A>T	p.Asp32Val	p.D32V	ENST00000349496	3/15	375/3729	95/2346	32/781	D/V	gAc/gTc
Non-CRC	TCGA.CC.A7IL.01	liver	CTNNB1	GRCh37	3	41266098	41266098	Missense_Mutation	SNP	A	A	T	c.95A>T	p.Asp32Val	p.D32V	ENST00000349496	3/15	375/3729	95/2346	32/781	D/V	gAc/gTc
Non-CRC	TCGA.CG.5727.01	stomach	CTNNB1	GRCh37	3	41266113	41266113	Missense_Mutation	SNP	C	C	G	c.110C>G	p.Ser37Cys	p.S37C	ENST00000349496	3/15	390/3729	110/2346	37/781	S/C	tCt/tGt
Non-CRC	TCGA.CH.5752.01	prostate	CTNNB1	GRCh37	3	41266136	41266136	Missense_Mutation	SNP	T	T	C	c.133T>C	p.Ser45Pro	p.S45P	ENST00000349496	3/15	413/3729	133/2346	45/781	S/P	Tct/Cct
Non-CRC	TCGA.D1.A0ZN.01	endometrium	CTNNB1	GRCh37	3	41266101	41266101	Missense_Mutation	SNP	C	C	G	c.98C>G	p.Ser33Cys	p.S33C	ENST00000349496	3/15	378/3729	98/2346	33/781	S/C	tCt/tGt
Non-CRC	TCGA.D1.A0ZQ.01	endometrium	CTNNB1	GRCh37	3	41266113	41266113	Missense_Mutation	SNP	C	C	T	c.110C>T	p.Ser37Phe	p.S37F	ENST00000349496	3/15	390/3729	110/2346	37/781	S/F	tCt/tTt
Non-CRC	TCGA.D1.A0ZU.01	endometrium	CTNNB1	GRCh37	3	41266101	41266101	Missense_Mutation	SNP	C	C	T	c.98C>T	p.Ser33Phe	p.S33F	ENST00000349496	3/15	378/3729	98/2346	33/781	S/F	tCt/tTt
Non-CRC	TCGA.D1.A102.01	endometrium	CTNNB1	GRCh37	3	41266103	41266103	Missense_Mutation	SNP	G	G	A	c.100G>A	p.Gly34Arg	p.G34R	ENST00000349496	3/15	380/3729	100/2346	34/781	G/R	Gga/Aga
Non-CRC	TCGA.D1.A15Z.01	endometrium	CTNNB1	GRCh37	3	41266113	41266113	Missense_Mutation	SNP	C	C	G	c.110C>G	p.Ser37Cys	p.S37C	ENST00000349496	3/15	390/3729	110/2346	37/781	S/C	tCt/tGt
Non-CRC	TCGA.D1.A165.01	endometrium	CTNNB1	GRCh37	3	41266100	41266100	Missense_Mutation	SNP	T	T	C	c.97T>C	p.Ser33Pro	p.S33P	ENST00000349496	3/15	377/3729	97/2346	33/781	S/P	Tct/Cct
Non-CRC	TCGA.D1.A165.01	endometrium	CTNNB1	GRCh37	3	41266101	41266101	Missense_Mutation	SNP	C	C	A	c.98C>A	p.Ser33Tyr	p.S33Y	ENST00000349496	3/15	378/3729	98/2346	33/781	S/Y	tCt/tAt
Non-CRC	TCGA.D1.A16B.01	endometrium	CTNNB1	GRCh37	3	41266113	41266113	Missense_Mutation	SNP	C	C	T	c.110C>T	p.Ser37Phe	p.S37F	ENST00000349496	3/15	390/3729	110/2346	37/781	S/F	tCt/tTt
Non-CRC	TCGA.D1.A16Q.01	endometrium	CTNNB1	GRCh37	3	41266113	41266113	Missense_Mutation	SNP	C	C	T	c.110C>T	p.Ser37Phe	p.S37F	ENST00000349496	3/15	390/3729	110/2346	37/781	S/F	tCt/tTt
Non-CRC	TCGA.D1.A16R.01	endometrium	CTNNB1	GRCh37	3	41266107	41266107	Missense_Mutation	SNP	T	T	G	c.104T>G	p.Ile35Ser	p.I35S	ENST00000349496	3/15	384/3729	104/2346	35/781	I/S	aTc/aGc
Non-CRC	TCGA.D1.A17C.01	endometrium	CTNNB1	GRCh37	3	41266101	41266101	Missense_Mutation	SNP	C	C	T	c.98C>T	p.Ser33Phe	p.S33F	ENST00000349496	3/15	378/3729	98/2346	33/781	S/F	tCt/tTt
Non-CRC	TCGA.D1.A17M.01	endometrium	CTNNB1	GRCh37	3	41266097	41266097	Missense_Mutation	SNP	G	G	A	c.94G>A	p.Asp32Asn	p.D32N	ENST00000349496	3/15	374/3729	94/2346	32/781	D/N	Gac/Aac
Non-CRC	TCGA.D1.A17M.01	endometrium	CTNNB1	GRCh37	3	41266104	41266104	Missense_Mutation	SNP	G	G	T	c.101G>T	p.Gly34Val	p.G34V	ENST00000349496	3/15	381/3729	101/2346	34/781	G/V	gGa/gTa
Non-CRC	TCGA.D1.A17N.01	endometrium	CTNNB1	GRCh37	3	41266103	41266103	Missense_Mutation	SNP	G	G	A	c.100G>A	p.Gly34Arg	p.G34R	ENST00000349496	3/15	380/3729	100/2346	34/781	G/R	Gga/Aga
Non-CRC	TCGA.D1.A17R.01	endometrium	CTNNB1	GRCh37	3	41266113	41266113	Missense_Mutation	SNP	C	C	T	c.110C>T	p.Ser37Phe	p.S37F	ENST00000349496	3/15	390/3729	110/2346	37/781	S/F	tCt/tTt
Non-CRC	TCGA.D1.A17S.01	endometrium	CTNNB1	GRCh37	3	41266097	41266097	Missense_Mutation	SNP	G	G	T	c.94G>T	p.Asp32Tyr	p.D32Y	ENST00000349496	3/15	374/3729	94/2346	32/781	D/Y	Gac/Tac
Non-CRC	TCGA.D1.A17T.01	endometrium	CTNNB1	GRCh37	3	41266113	41266113	Missense_Mutation	SNP	C	C	G	c.110C>G	p.Ser37Cys	p.S37C	ENST00000349496	3/15	390/3729	110/2346	37/781	S/C	tCt/tGt
Non-CRC	TCGA.D7.6822.01	stomach	CTNNB1	GRCh37	3	41266113	41266113	Missense_Mutation	SNP	C	C	T	c.110C>T	p.Ser37Phe	p.S37F	ENST00000349496	3/15	390/3729	110/2346	37/781	S/F	tCt/tTt
Non-CRC	TCGA.D9.A149.06	skin	CTNNB1	GRCh37	3	41266125	41266125	Missense_Mutation	SNP	C	C	T	c.122C>T	p.Thr41Ile	p.T41I	ENST00000349496	3/15	402/3729	122/2346	41/781	T/I	aCc/aTc
Non-CRC	TCGA.DD.A116.01	liver	CTNNB1	GRCh37	3	41266100	41266100	Missense_Mutation	SNP	T	T	C	c.97T>C	p.Ser33Pro	p.S33P	ENST00000349496	3/15	377/3729	97/2346	33/781	S/P	Tct/Cct
Non-CRC	TCGA.DD.A119.01	liver	CTNNB1	GRCh37	3	41266104	41266104	Missense_Mutation	SNP	G	G	T	c.101G>T	p.Gly34Val	p.G34V	ENST00000349496	3/15	381/3729	101/2346	34/781	G/V	gGa/gTa
Non-CRC	TCGA.DD.A11D.01	liver	CTNNB1	GRCh37	3	41266124	41266124	Missense_Mutation	SNP	A	A	G	c.121A>G	p.Thr41Ala	p.T41A	ENST00000349496	3/15	401/3729	121/2346	41/781	T/A	Acc/Gcc
Non-CRC	TCGA.DD.A39V.01	liver	CTNNB1	GRCh37	3	41266100	41266100	Missense_Mutation	SNP	T	T	C	c.97T>C	p.Ser33Pro	p.S33P	ENST00000349496	3/15	377/3729	97/2346	33/781	S/P	Tct/Cct
Non-CRC	TCGA.DD.A4NF.01	liver	CTNNB1	GRCh37	3	41266097	41266097	Missense_Mutation	SNP	G	G	T	c.94G>T	p.Asp32Tyr	p.D32Y	ENST00000349496	3/15	374/3729	94/2346	32/781	D/Y	Gac/Tac
Non-CRC	TCGA.DD.A4NK.01	liver	CTNNB1	GRCh37	3	41266137	41266137	Missense_Mutation	SNP	C	C	A	c.134C>A	p.Ser45Tyr	p.S45Y	ENST00000349496	3/15	414/3729	134/2346	45/781	S/Y	tCt/tAt
Non-CRC	TCGA.DD.A73A.01	liver	CTNNB1	GRCh37	3	41274910	41274910	Missense_Mutation	SNP	A	A	T	c.1160A>T	p.Asn387Ile	p.N387I	ENST00000349496	8/15	1440/3729	1160/2346	387/781	N/I	aAt/aTt
Non-CRC	TCGA.DD.A73D.01	liver	CTNNB1	GRCh37	3	41266098	41266098	Missense_Mutation	SNP	A	A	G	c.95A>G	p.Asp32Gly	p.D32G	ENST00000349496	3/15	375/3729	95/2346	32/781	D/G	gAc/gGc
Non-CRC	TCGA.DD.A73E.01	liver	CTNNB1	GRCh37	3	41266098	41266098	Missense_Mutation	SNP	A	A	T	c.95A>T	p.Asp32Val	p.D32V	ENST00000349496	3/15	375/3729	95/2346	32/781	D/V	gAc/gTc
Non-CRC	TCGA.DK.A1AC.01	urinary tract	CTNNB1	GRCh37	3	41266101	41266101	Missense_Mutation	SNP	C	C	T	c.98C>T	p.Ser33Phe	p.S33F	ENST00000349496	3/15	378/3729	98/2346	33/781	S/F	tCt/tTt
Non-CRC	TCGA.EB.A3Y7.01	skin	CTNNB1	GRCh37	3	41266098	41266098	Missense_Mutation	SNP	A	A	G	c.95A>G	p.Asp32Gly	p.D32G	ENST00000349496	3/15	375/3729	95/2346	32/781	D/G	gAc/gGc
Non-CRC	TCGA.EB.A42Y.01	skin	CTNNB1	GRCh37	3	41266125	41266125	Missense_Mutation	SNP	C	C	T	c.122C>T	p.Thr41Ile	p.T41I	ENST00000349496	3/15	402/3729	122/2346	41/781	T/I	aCc/aTc
Non-CRC	TCGA.EB.A42Y.01	skin	CTNNB1	GRCh37	3	41266137	41266137	Missense_Mutation	SNP	C	C	T	c.134C>T	p.Ser45Phe	p.S45F	ENST00000349496	3/15	414/3729	134/2346	45/781	S/F	tCt/tTt
Non-CRC	TCGA.EB.A5SH.06	skin	CTNNB1	GRCh37	3	41266125	41266125	Missense_Mutation	SNP	C	C	A	c.122C>A	p.Thr41Asn	p.T41N	ENST00000349496	3/15	402/3729	122/2346	41/781	T/N	aCc/aAc
Non-CRC	TCGA.ED.A7PZ.01	liver	CTNNB1	GRCh37	3	41266098	41266098	Missense_Mutation	SNP	A	A	G	c.95A>G	p.Asp32Gly	p.D32G	ENST00000349496	3/15	375/3729	95/2346	32/781	D/G	gAc/gGc
Non-CRC	TCGA.ED.A7XP.01	liver	CTNNB1	GRCh37	3	41266101	41266101	Missense_Mutation	SNP	C	C	G	c.98C>G	p.Ser33Cys	p.S33C	ENST00000349496	3/15	378/3729	98/2346	33/781	S/C	tCt/tGt
Non-CRC	TCGA.EJ.5494.01	prostate	CTNNB1	GRCh37	3	41266098	41266098	Missense_Mutation	SNP	A	A	T	c.95A>T	p.Asp32Val	p.D32V	ENST00000349496	3/15	375/3729	95/2346	32/781	D/V	gAc/gTc
Non-CRC	TCGA.EJ.5525.01	prostate	CTNNB1	GRCh37	3	41266097	41266097	Missense_Mutation	SNP	G	G	C	c.94G>C	p.Asp32His	p.D32H	ENST00000349496	3/15	374/3729	94/2346	32/781	D/H	Gac/Cac
Non-CRC	TCGA.EJ.A65D.01	prostate	CTNNB1	GRCh37	3	41266124	41266124	Missense_Mutation	SNP	A	A	G	c.121A>G	p.Thr41Ala	p.T41A	ENST00000349496	3/15	401/3729	121/2346	41/781	T/A	Acc/Gcc
Non-CRC	TCGA.EP.A12J.01	liver	CTNNB1	GRCh37	3	41266100	41266100	Missense_Mutation	SNP	T	T	G	c.97T>G	p.Ser33Ala	p.S33A	ENST00000349496	3/15	377/3729	97/2346	33/781	S/A	Tct/Gct
Non-CRC	TCGA.EP.A26S.01	liver	CTNNB1	GRCh37	3	41266125	41266125	Missense_Mutation	SNP	C	C	T	c.122C>T	p.Thr41Ile	p.T41I	ENST00000349496	3/15	402/3729	122/2346	41/781	T/I	aCc/aTc
Non-CRC	TCGA.EP.A2KC.01	liver	CTNNB1	GRCh37	3	41266098	41266098	Missense_Mutation	SNP	A	A	G	c.95A>G	p.Asp32Gly	p.D32G	ENST00000349496	3/15	375/3729	95/2346	32/781	D/G	gAc/gGc
Non-CRC	TCGA.EP.A3JL.01	liver	CTNNB1	GRCh37	3	41274911	41274911	Missense_Mutation	SNP	T	T	A	c.1161T>A	p.Asn387Lys	p.N387K	ENST00000349496	8/15	1441/3729	1161/2346	387/781	N/K	aaT/aaA
Non-CRC	TCGA.EP.A3RK.01	liver	CTNNB1	GRCh37	3	41266104	41266104	Missense_Mutation	SNP	G	G	A	c.101G>A	p.Gly34Glu	p.G34E	ENST00000349496	3/15	381/3729	101/2346	34/781	G/E	gGa/gAa
Non-CRC	TCGA.ER.A19O.06	skin	CTNNB1	GRCh37	3	41266124	41266124	Missense_Mutation	SNP	A	A	G	c.121A>G	p.Thr41Ala	p.T41A	ENST00000349496	3/15	401/3729	121/2346	41/781	T/A	Acc/Gcc
Non-CRC	TCGA.FS.A1YY.06	skin	CTNNB1	GRCh37	3	41266137	41266137	Missense_Mutation	SNP	C	C	G	c.134C>G	p.Ser45Cys	p.S45C	ENST00000349496	3/15	414/3729	134/2346	45/781	S/C	tCt/tGt
Non-CRC	TCGA.FS.A4F9.06	skin	CTNNB1	GRCh37	3	41266103	41266103	Missense_Mutation	SNP	G	G	A	c.100G>A	p.Gly34Arg	p.G34R	ENST00000349496	3/15	380/3729	100/2346	34/781	G/R	Gga/Aga
Non-CRC	TCGA.FU.A3HZ.01	cervix	CTNNB1	GRCh37	3	41266098	41266098	Missense_Mutation	SNP	A	A	G	c.95A>G	p.Asp32Gly	p.D32G	ENST00000349496	3/15	375/3729	95/2346	32/781	D/G	gAc/gGc
Non-CRC	TCGA.FV.A2QQ.01	liver	CTNNB1	GRCh37	3	41274911	41274911	Missense_Mutation	SNP	T	T	G	c.1161T>G	p.Asn387Lys	p.N387K	ENST00000349496	8/15	1441/3729	1161/2346	387/781	N/K	aaT/aaG
Non-CRC	TCGA.FV.A4ZQ.01	liver	CTNNB1	GRCh37	3	41266101	41266101	Missense_Mutation	SNP	C	C	G	c.98C>G	p.Ser33Cys	p.S33C	ENST00000349496	3/15	378/3729	98/2346	33/781	S/C	tCt/tGt
Non-CRC	TCGA.G3.A25S.01	liver	CTNNB1	GRCh37	3	41266097	41266097	Missense_Mutation	SNP	G	G	A	c.94G>A	p.Asp32Asn	p.D32N	ENST00000349496	3/15	374/3729	94/2346	32/781	D/N	Gac/Aac
Non-CRC	TCGA.G3.A3CJ.01	liver	CTNNB1	GRCh37	3	41266104	41266104	Missense_Mutation	SNP	G	G	T	c.101G>T	p.Gly34Val	p.G34V	ENST00000349496	3/15	381/3729	101/2346	34/781	G/V	gGa/gTa
Non-CRC	TCGA.G3.A3CK.01	liver	CTNNB1	GRCh37	3	41266100	41266100	Missense_Mutation	SNP	T	T	C	c.97T>C	p.Ser33Pro	p.S33P	ENST00000349496	3/15	377/3729	97/2346	33/781	S/P	Tct/Cct
Non-CRC	TCGA.G3.A5SL.01	liver	CTNNB1	GRCh37	3	41266098	41266098	Missense_Mutation	SNP	A	A	G	c.95A>G	p.Asp32Gly	p.D32G	ENST00000349496	3/15	375/3729	95/2346	32/781	D/G	gAc/gGc
Non-CRC	TCGA.G3.A6UC.01	liver	CTNNB1	GRCh37	3	41266100	41266100	Missense_Mutation	SNP	T	T	C	c.97T>C	p.Ser33Pro	p.S33P	ENST00000349496	3/15	377/3729	97/2346	33/781	S/P	Tct/Cct
Non-CRC	TCGA.GN.A269.01	skin	CTNNB1	GRCh37	3	41266104	41266104	Missense_Mutation	SNP	G	G	A	c.101G>A	p.Gly34Glu	p.G34E	ENST00000349496	3/15	381/3729	101/2346	34/781	G/E	gGa/gAa
Non-CRC	TCGA.HC.7212.01	prostate	CTNNB1	GRCh37	3	41266112	41266112	Missense_Mutation	SNP	T	T	G	c.109T>G	p.Ser37Ala	p.S37A	ENST00000349496	3/15	389/3729	109/2346	37/781	S/A	Tct/Gct
Non-CRC	TCGA.HC.7738.01	prostate	CTNNB1	GRCh37	3	41266124	41266124	Missense_Mutation	SNP	A	A	G	c.121A>G	p.Thr41Ala	p.T41A	ENST00000349496	3/15	401/3729	121/2346	41/781	T/A	Acc/Gcc
Non-CRC	TCGA.HC.8262.01	prostate	CTNNB1	GRCh37	3	41266097	41266097	Missense_Mutation	SNP	G	G	T	c.94G>T	p.Asp32Tyr	p.D32Y	ENST00000349496	3/15	374/3729	94/2346	32/781	D/Y	Gac/Tac
Non-CRC	TCGA.HQ.A2OE.01	urinary tract	CTNNB1	GRCh37	3	41266097	41266097	Missense_Mutation	SNP	G	G	C	c.94G>C	p.Asp32His	p.D32H	ENST00000349496	3/15	374/3729	94/2346	32/781	D/H	Gac/Cac
Non-CRC	TCGA.HU.A4G6.01	stomach	CTNNB1	GRCh37	3	41266103	41266103	Missense_Mutation	SNP	G	G	A	c.100G>A	p.Gly34Arg	p.G34R	ENST00000349496	3/15	380/3729	100/2346	34/781	G/R	Gga/Aga
Non-CRC	TCGA.HU.A4H5.01	stomach	CTNNB1	GRCh37	3	41266100	41266100	Missense_Mutation	SNP	T	T	C	c.97T>C	p.Ser33Pro	p.S33P	ENST00000349496	3/15	377/3729	97/2346	33/781	S/P	Tct/Cct
Non-CRC	TCGA.IR.A3LA.01	cervix	CTNNB1	GRCh37	3	41266113	41266113	Missense_Mutation	SNP	C	C	G	c.110C>G	p.Ser37Cys	p.S37C	ENST00000349496	3/15	390/3729	110/2346	37/781	S/C	tCt/tGt
Non-CRC	TCGA.JW.A5VH.01	cervix	CTNNB1	GRCh37	3	41266098	41266098	Missense_Mutation	SNP	A	A	G	c.95A>G	p.Asp32Gly	p.D32G	ENST00000349496	3/15	375/3729	95/2346	32/781	D/G	gAc/gGc
Non-CRC	TCGA.KR.A7K0.01	liver	CTNNB1	GRCh37	3	41266112	41266112	Missense_Mutation	SNP	T	T	G	c.109T>G	p.Ser37Ala	p.S37A	ENST00000349496	3/15	389/3729	109/2346	37/781	S/A	Tct/Gct
Non-CRC	TCGA.MI.A75H.01	liver	CTNNB1	GRCh37	3	41266098	41266098	Missense_Mutation	SNP	A	A	T	c.95A>T	p.Asp32Val	p.D32V	ENST00000349496	3/15	375/3729	95/2346	32/781	D/V	gAc/gTc
Non-CRC	TCGA.O8.A75V.01	liver	CTNNB1	GRCh37	3	41266136	41266136	Missense_Mutation	SNP	T	T	C	c.133T>C	p.Ser45Pro	p.S45P	ENST00000349496	3/15	413/3729	133/2346	45/781	S/P	Tct/Cct
Non-CRC	TCGA.QU.A6IM.01	prostate	CTNNB1	GRCh37	3	41266100	41266100	Missense_Mutation	SNP	T	T	G	c.97T>G	p.Ser33Ala	p.S33A	ENST00000349496	3/15	377/3729	97/2346	33/781	S/A	Tct/Gct
Non-CRC	TCGA.RG.A7D4.01	liver	CTNNB1	GRCh37	3	41266136	41266136	Missense_Mutation	SNP	T	T	C	c.133T>C	p.Ser45Pro	p.S45P	ENST00000349496	3/15	413/3729	133/2346	45/781	S/P	Tct/Cct
Non-CRC	TCGA.UB.A7MC.01	liver	CTNNB1	GRCh37	3	41266113	41266113	Missense_Mutation	SNP	C	C	G	c.110C>G	p.Ser37Cys	p.S37C	ENST00000349496	3/15	390/3729	110/2346	37/781	S/C	tCt/tGt
Non-CRC	TCGA.UB.A7MD.01	liver	CTNNB1	GRCh37	3	41266097	41266097	Missense_Mutation	SNP	G	G	A	c.94G>A	p.Asp32Asn	p.D32N	ENST00000349496	3/15	374/3729	94/2346	32/781	D/N	Gac/Aac

## Sheet: Sup Table 4
Supplementary Table 4: Mutation calls for RSPO fusions detected by RNA sequencing. Numbers corresponds to total number of reads containing breakpoint sequence.
				RSPO3				RSPO2
Cohort	Tumor_Sample_Barcode	Primary_site	Approach	PTPRK (ex1) - RSPO3 (ex2)	PTPRK (ex6) - RSPO3 (ex2)	PTPRK (ex7) - RSPO3 (ex2)	PTPRK (ex13) - RSPO3 (ex2)	EIF3E (ex1) - RSPO2 (ex2)	EIF3E (ex1) - RSPO2 (ex3)
DC_A	TCGA-AA-3518	Colorectal	RNA seq	6	0	0	0	0	0
DC_A	TCGA-G5-6233	Colorectal	RNA seq	0	0	26	0	0	0
DC_A	TCGA-DM-A1HB	Colorectal	RNA seq	0	0	47	0	1	0
DC_A	TCGA-CA-5255	Colorectal	RNA seq	31	0	0	0	0	0
DC_A	TCGA-AF-6136	Colorectal	RNA seq	20	0	0	0	0	0
DC_A	TCGA-D5-6539	Colorectal	RNA seq	40	0	0	0	0	0
DC_A	TCGA-AA-3664	Colorectal	RNA seq	11	0	0	0	0	0
DC_A	TCGA-DT-5265	Colorectal	RNA seq	9	0	0	0	0	0
DC_A	TCGA-A6-2672	Colorectal	RNA seq	7	0	0	0	0	0
DC_A	TCGA-AA-3842	Colorectal	RNA seq	3	0	0	0	0	0
DC_A	TCGA-QG-A5YX	Colorectal	RNA seq	42	0	0	0	0	0
DC_B	GENENt_14955	Colorectal	RNA seq	73	0	0	0	0	0
DC_B	GENENt_14973	Colorectal	RNA seq	42	0	0	0	0	0
DC_B	GENENt_14980	Colorectal	RNA seq	0	0	154	0	0	0
DC_B	GENENt_32191	Colorectal	RNA seq	0	0	0	0	59	11
DC_B	GENENt_32854	Colorectal	RNA seq	121	0	0	0	0	0
DC_B	GENENt_32900	Colorectal	RNA seq	29	0	0	0	0	0
DC_B	GENENt_32906	Colorectal	RNA seq	0	0	0	0	47	10
Pancancer	TCGA-DI-A2QU	Endometrial	RNA seq	1	0	0	0	0	0
Pancancer	TCGA-L5-A4OE	Oesophageal	RNA seq	0	0	0	0	2	0
Pancancer	TCGA-JY-A938	Oesophageal	RNA seq	0	0	88	0	0	0
Pancancer	TCGA-2J-AABA	Pancreas	RNA seq	0	0	0	1	0	0
Pancancer	TCGA-HZ-A77P	Pancreas	RNA seq	0	0	1	0	0	0
Pancancer	TCGA-KK-A8I9	Prostate	RNA seq	1	0	0	0	0	0
Pancancer	TCGA-2A-A8W3	Prostate	RNA seq	1	0	0	0	0	0
Pancancer	TCGA-KB-A93H	Stomach	RNA seq	0	0	0	0	4	2
Pancancer	TCGA-BR-6566	Stomach	RNA seq	0	0	0	0	6	0
Pancancer	TCGA-VQ-A92D	Stomach	RNA seq	0	0	4	296	0	0
Pancancer	TCGA-D7-5578	Stomach	RNA seq	61	0	0	0	0	0
Pancancer	TCGA-VQ-AA68	Stomach	RNA seq	319	0	0	0	0	0
Polyp	SC00757A	Colorectal	RNA seq	19	0	0	0	0	0
Polyp	SC00763A	Colorectal	RNA seq	12	0	0	0	0	0
Polyp	SC00762A	Colorectal	RNA seq	0	1	127	0	0	0
Val_A	SC00233A	Colorectal	Custom panel	1611	0	0	0	0	0
Val_A	SC00307A	Colorectal	Custom panel	1819	0	0	0	0	0
Val_A	SC00331A	Colorectal	Custom panel	0	0	9595	0	0	0
Val_A	SC00490A	Colorectal	Custom panel	2449	0	0	0	0	0
Val_B	SC00989A	Colorectal	Custom panel	1	0	0	0	0	0
Val_B	SC00568A	Colorectal	Custom panel	1	0	0	6111	0	0
Val_B	SC00570A	Colorectal	Custom panel	1231	0	0	0	0	0
Val_B	SC00599A	Colorectal	Custom panel	5813	0	0	0	0	0
Clin_app	TC_1175111	Colorectal	Custom panel	4332	0	0	0	0	0
Clin_app	TC_1500516	Colorectal	Custom panel	1925	0	0	0	0	0
Clin_app	TC_4535417	Colorectal	Custom panel	536	0	0	0	0	0

## Sheet: Sup Table 5
Supplementary Table 5: Curated gene lists and corresponding references (Pubmed IDs) used for gene set enrichment analysis (GSEA).
Global Wnt targets		Intestinal stem cell Wnt targets		Proliferative cell Wnt target genes		Wnt negative regulator genes
Gene	Reference (PMID)	Gene	Reference (PMID)	Gene	Reference (PMID)	Gene	Reference (PMID)
AAGAB	17785439	LGR5	17934449	AXIN2	11809808	NOTUM	25731175
AASDHPPT	17785439	OLFM4	19269367	CD44	10027409	WIF1	21342268
ACAT2	17785439	ASCL2	19269367	CCND1	10318916	SFRP1	21342268
ACP1	17785439	TNFRSF19	19269367	MYC	9727977	SFRP2	21342268
ACP2	17785439	BMI1	22190486	CDKN1A	16793760	SFRP3	21342268
ADA	17785439	TERT	22692129	SOX9	15240568	SFRP4	21342268
ADCK3	17785439	MSI1	12560091	CDX1	17537796	SFRP5	21342268
ADD3	17785439	EPHB2	21419747	MMP7	10514384	CER1	10067895
ADRA2A	17785439	NR2E3	25620640	LEF1	11326276	DKK1	21342268
ADSL	17785439					DKK2	21342268
AFP	17785439					DKK3	21342268
AHCYL1	17785439					DKK4	21342268
AKR1B1	17785439					APCDD1	21342268
ALG6	17785439					AXIN2	11809808
ANAPC5	17785439					SP5	29044119
ANKRD10	17785439					NKD1	21342268
AP3B1	17785439					NKD2	21342268
APEX1	17785439
APPBP2	17785439
AQP1	17785439
AQP4	17785439
ARF6	17785439
ARGLU1	17785439
ARHGAP27	17785439
ARHGAP5	17785439
ASCL2	17785439
ASF1B	17785439
ATP5J	17785439
AURKB	17785439
AXIN2	17785439
BCAS2	17785439
BCL7C	17785439
BCOR	17785439
BIRC5	17785439
BORA	17785439
BRCA1	17785439
BRCA2	17785439
BTF3	17785439
BUB1	17785439
BUB1B	17785439
C11orf73	17785439
C11orf82	17785439
C13orf15	17785439
C15orf23	17785439
C16orf80	17785439
C1orf31	17785439
C22orf29	17785439
C2orf3	17785439
C3orf26	17785439
C4orf21	17785439
C4orf27	17785439
C4orf43	17785439
C5orf24	17785439
C5orf34	17785439
C9orf41	17785439
CA2	17785439
CAPRIN1	17785439
CAPRIN2	17785439
CARD11	17785439
CASP8AP2	17785439
CBFB	17785439
CBLL1	17785439
CBX1	17785439
CBX5	17785439
CCNA2	17785439
CCNB2	17785439
CCND1	17785439
CCND2	17785439
CCNE2	17785439
CCP110	17785439
CCT2	17785439
CCT3	17785439
CCT4	17785439
CCT5	17785439
CD2AP	17785439
CD44	17785439
CDC20	17785439
CDC25C	17785439
CDC6	17785439
CDC7	17785439
CDCA4	17785439
CDK1	17785439
CDKN3	17785439
CDO1	17785439
CDT1	17785439
CDV3	17785439
CENPE	17785439
CENPH	17785439
CENPI	17785439
CENPL	17785439
CENPO	17785439
CENPP	17785439
CENPW	17785439
CES1	17785439
CETN3	17785439
CFI	17785439
CHAF1B	17785439
CHEK1	17785439
CHEK2	17785439
CHTF18	17785439
CHTF8	17785439
CKAP2	17785439
CLDN2	17785439
CLPX	17785439
CNN3	17785439
CNNM3	17785439
CNOT7	17785439
CPT1A	17785439
CREB1	17785439
CRIM1	17785439
CRP	17785439
CRYM	17785439
CSRP2	17785439
CTBP2	17785439
CTC1	17785439
CTCF	17785439
CTNNB1	17785439
CTPS	17785439
CUBN	17785439
CYBRD1	17785439
CYP2C18	17785439
CYP2C9	17785439
CYP3A43	17785439
CYP3A5	17785439
DCAF17	17785439
DCK	17785439
DCTD	17785439
DDX1	17785439
DDX21	17785439
DDX5	17785439
DEK	17785439
DHFR	17785439
DHX15	17785439
DHX36	17785439
DIAPH3	17785439
DIS3	17785439
DLD	17785439
DMD	17785439
DNAAF2	17785439
DNMT1	17785439
DRG1	17785439
DSCC1	17785439
DTYMK	17785439
E2F1	17785439
E2F5	17785439
ECT2	17785439
EED	17785439
EEF1D	17785439
EEFSEC	17785439
EGFR	17785439
EHF	17785439
EIF2A	17785439
EIF2S1	17785439
EIF2S2	17785439
EIF2S3	17785439
EIF3A	17785439
EIF3E	17785439
EIF3F	17785439
EIF3L	17785439
EIF3M	17785439
EIF4A1	17785439
EIF5	17785439
ELF2	17785439
ENPP3	17785439
EPHB2	17785439
EPHB3	17785439
EPHB4	17785439
ERGIC1	17785439
ERH	17785439
ESRRG	17785439
ETAA1	17785439
EVL	17785439
EXO1	17785439
EZH2	17785439
FAM108B1	17785439
FAM136A	17785439
FAM169B	17785439
FAM183B	17785439
FAM203A	17785439
FAM82A2	17785439
FASTKD2	17785439
FBL	17785439
FBP1	17785439
FBXO5	17785439
FEN1	17785439
FGD1	17785439
FGF1	17785439
FGFBP1	17785439
FIGNL1	17785439
FKBP3	17785439
FOXM1	17785439
FRAS1	17785439
FTSJD1	17785439
FZD1	17785439
G2E3	17785439
GART	17785439
GCDH	17785439
GEMIN4	17785439
GFER	17785439
GINS1	17785439
GJB3	17785439
GLRX3	17785439
GMPS	17785439
GNAI3	17785439
GNPNAT1	17785439
GRSF1	17785439
GRWD1	17785439
GSG2	17785439
GSTM1	17785439
GTPBP10	17785439
GTPBP4	17785439
H2AFY	17785439
H2AFZ	17785439
HADH	17785439
HAT1	17785439
HAUS6	17785439
HAUS8	17785439
HBA2	17785439
HBB	17785439
HDAC2	17785439
HDGF	17785439
HELLS	17785439
HEMGN	17785439
HIST1H2AD	17785439
HIST2H2BF	17785439
HMGA2	17785439
HMGB1	17785439
HMGB2	17785439
HMGB3	17785439
HMGN1	17785439
HMGN2	17785439
HMGN5	17785439
HNRNPAB	17785439
HNRNPR	17785439
HRSP12	17785439
HSF1	17785439
HSPA8	17785439
IDE	17785439
IFFO2	17785439
IFITM2	17785439
IKBKAP	17785439
ILF3	17785439
IMPA2	17785439
IMPDH2	17785439
INCENP	17785439
INVS	17785439
IVD	17785439
KAT2A	17785439
KCNE3	17785439
KCNN4	17785439
KCNQ1	17785439
KDM1B	17785439
KIAA0100	17785439
KIAA0101	17785439
KIAA0947	17785439
KIAA1524	17785439
KIF18A	17785439
KIF20A	17785439
KIF22	17785439
KIF23	17785439
KIF5B	17785439
KIFC1	17785439
KNTC1	17785439
KPNA2	17785439
LARP4	17785439
LBR	17785439
LIG1	17785439
LIMD1	17785439
LIPG	17785439
LIPT2	17785439
LPP	17785439
LRAT	17785439
LRIG1	17785439
LSM2	17785439
LSM5	17785439
LUC7L	17785439
LYPLA1	17785439
MAGT1	17785439
MATN2	17785439
MATR3	17785439
MBNL3	17785439
MCM2	17785439
MCM3	17785439
MCM4	17785439
MCM5	17785439
MCM6	17785439
MCM7	17785439
MEIS2	17785439
MELK	17785439
METTL13	17785439
MIS18BP1	17785439
MKI67	17785439
MOGS	17785439
MRE11A	17785439
MRPL1	17785439
MRPL13	17785439
MRPL3	17785439
MRPS22	17785439
MSH2	17785439
MSH3	17785439
MSH6	17785439
MSI2	17785439
MTBP	17785439
MTF2	17785439
MTHFD1	17785439
MTRR	17785439
MYB	17785439
NAA15	17785439
NACA	17785439
NAP1L1	17785439
NASP	17785439
NCAPD2	17785439
NCL	17785439
NCOA4	17785439
NDUFAF1	17785439
NEUROG3	17785439
NFIX	17785439
NINL	17785439
NMRAL1	17785439
NNT	17785439
NOLC1	17785439
NOP56	17785439
NOP58	17785439
NOTCH1	17785439
NOTCH2	17785439
NRIP1	17785439
NRM	17785439
NSMCE4A	17785439
NUF2	17785439
NUP155	17785439
NUP210	17785439
NUP62	17785439
NUTF2	17785439
NXT1	17785439
ORC6	17785439
OTC	17785439
P2RY6	17785439
PA2G4	17785439
PABPC1	17785439
PAICS	17785439
PAPOLA	17785439
PAPSS2	17785439
PCDH8	17785439
PCNA	17785439
PDS5B	17785439
PDX1	17785439
PECR	17785439
PFKP	17785439
PHGDH	17785439
PIK3R1	17785439
PITRM1	17785439
PIWIL2	17785439
PKDCC	17785439
PLA2G4A	17785439
PMS1	17785439
PNN	17785439
POLA1	17785439
POLB	17785439
POLD1	17785439
POLD2	17785439
POLE	17785439
POLE2	17785439
POLR1B	17785439
PPARG	17785439
PPAT	17785439
PPID	17785439
PPP1CB	17785439
PPP2CA	17785439
PPP2R3A	17785439
PPP2R5E	17785439
PQBP1	17785439
PRC1	17785439
PRDX4	17785439
PRELP	17785439
PRIM1	17785439
PRIM2	17785439
PRPF4	17785439
PRPS2	17785439
PSMA1	17785439
PSMA6	17785439
PSMB7	17785439
PSMC3IP	17785439
PTEN	17785439
PWP2	17785439
RAB1A	17785439
RACGAP1	17785439
RAD1	17785439
RAD21	17785439
RAD51	17785439
RAD51AP1	17785439
RAD54L	17785439
RASA3	17785439
RB1CC1	17785439
RBBP4	17785439
RBMXL1	17785439
REG1A	17785439
REG4	17785439
RFC1	17785439
RFC2	17785439
RFC3	17785439
RFC4	17785439
RGS12	17785439
RHOBTB3	17785439
RNF138	17785439
ROCK1	17785439
ROR2	17785439
RPA1	17785439
RPGR	17785439
RPL12	17785439
RPL3	17785439
RPL32	17785439
RPS24	17785439
RPS6KA6	17785439
RRM1	17785439
RRM2	17785439
RRP15	17785439
RRP1B	17785439
RRS1	17785439
RSF1	17785439
RSRC2	17785439
RUVBL1	17785439
RWDD3	17785439
SARNP	17785439
SCARB1	17785439
SCLT1	17785439
SCOC	17785439
SDC2	17785439
SDC4	17785439
SECTM1	17785439
SEMA5A	17785439
SERPINE2	17785439
SET	17785439
SF3A3	17785439
SF3B1	17785439
SFPQ	17785439
SFRP1	17785439
SFRP5	17785439
SGPP1	17785439
SH3BGRL	17785439
SHCBP1	17785439
SHMT1	17785439
SKA1	17785439
SKP2	17785439
SLBP	17785439
SLC12A2	17785439
SLC13A1	17785439
SLC18A2	17785439
SLC19A1	17785439
SLC25A5	17785439
SLC37A2	17785439
SLC40A1	17785439
SLC46A1	17785439
SLC4A7	17785439
SMARCA5	17785439
SMC1A	17785439
SMC3	17785439
SMC6	17785439
SMOC2	17785439
SMPD4	17785439
SMYD2	17785439
SMYD4	17785439
SMYD5	17785439
SNRPB2	17785439
SNRPD1	17785439
SNX5	17785439
SOS2	17785439
SOX4	17785439
SOX9	17785439
SP1	17785439
SP3	17785439
SPAG5	17785439
SPATA24	17785439
SPPL2A	17785439
SQRDL	17785439
SRRM1	17785439
SRSF1	17785439
SRSF2	17785439
SRSF3	17785439
SRSF6	17785439
SRSF7	17785439
SSB	17785439
SSRP1	17785439
STMN1	17785439
STRAP	17785439
STYX	17785439
SYCP3	17785439
SYT11	17785439
TAF9	17785439
TCF12	17785439
TCF19	17785439
TCP1	17785439
TERF1	17785439
TFAM	17785439
TFB2M	17785439
TGFBR1	17785439
THOC1	17785439
TIAM1	17785439
TIMELESS	17785439
TM9SF2	17785439
TMEFF1	17785439
TMEM107	17785439
TMPO	17785439
TMPRSS15	17785439
TOP2A	17785439
TOX	17785439
TPMT	17785439
TRAIP	17785439
TRIM27	17785439
TRIM28	17785439
TRIM37	17785439
TRIP13	17785439
TRIP6	17785439
TRMT11	17785439
TRMT6	17785439
TRNT1	17785439
TTC30A	17785439
TTC30B	17785439
TTK	17785439
TUBA3D	17785439
TUBB	17785439
TUBE1	17785439
TUBGCP2	17785439
TWISTNB	17785439
TYMS	17785439
U2SURP	17785439
UBAP1	17785439
UBE2E3	17785439
UBQLN2	17785439
UCHL3	17785439
UCHL5	17785439
UNG	17785439
USP1	17785439
USP14	17785439
UTP3	17785439
VBP1	17785439
VMA21	17785439
VRK2	17785439
WDR12	17785439
WEE1	17785439
WTAP	17785439
XPO1	17785439
XRN2	17785439
YWHAZ	17785439
ZDHHC2	17785439
ZFHX3	17785439
ZFP62	17785439
ZNF148	17785439
ZNF207	17785439
ZNF24	17785439
ZNF277	17785439
ZNF548	17785439
ZNF593	17785439
ZNHIT6	17785439

## Sheet: Sup Table 6
Supplementary Table 6: Differentially methylated CpG islands annotated to negative regulator genes, between LD and LI tumours.
CpG site	gene	logFC	AveExpr	t	P.Value	adj.P.Val	B	LI_AVG	LD_AVG	deltaBeta	Strand	Type	feature	cgi
cg11122009	AXIN2	-0.279206	0.223072	-10.7839	1.80696e-22	9.37485e-20	40.2606	0.182542	0.461748	0.279206	R	I	Body	shore
cg14623989	APCDD1	-0.154854	0.208765	-10.5757	8.37758e-22	3.66871e-19	38.7428	0.186286	0.34114	0.154854	F	I	Body	shore
cg19729649	NOTUM	-0.294928	0.159712	-10.2668	7.99351e-21	2.68154e-18	36.5117	0.1169	0.411828	0.294928	F	I	TSS1500	island
cg15866977	NOTUM	-0.347741	0.140135	-9.63951	7.18705e-19	1.54088e-16	32.0648	0.0896567	0.437398	0.347741	F	I	TSS1500	island
cg16750777	NKD1	-0.273441	0.465685	-9.29946	7.82496e-18	1.35256e-15	29.7067	0.425992	0.699433	0.273441	F	I	Body	island
cg00083833	NKD1	-0.309729	0.231513	-9.02103	5.36629e-17	7.85359e-15	27.8063	0.186553	0.496282	0.309729	F	II	Body	island
cg23475474	AXIN2	-0.211655	0.268019	-8.71893	4.19756e-16	5.04042e-14	25.7774	0.237295	0.448949	0.211655	R	II	Body	opensea
cg24704123	APCDD1	-0.198682	0.188542	-8.46455	2.30807e-15	2.36461e-13	24.0973	0.159701	0.358383	0.198682	R	I	1stExon	island
cg13814374	APCDD1	-0.263609	0.118299	-8.40623	3.39902e-15	3.37446e-13	23.7159	0.0800331	0.343642	0.263609	F	II	Body	island
cg26328002	APCDD1	-0.187938	0.0765247	-8.34363	5.14179e-15	4.93313e-13	23.3081	0.0492434	0.237182	0.187938	R	II	Body	shore
cg05627083	APCDD1	-0.253036	0.0921672	-8.32975	5.6347e-15	5.35164e-13	23.218	0.0554362	0.308472	0.253036	R	I	5'UTR	island
cg01499217	APCDD1	-0.264517	0.0980407	-8.16819	1.6256e-14	1.41357e-12	22.1746	0.0596431	0.32416	0.264517	R	I	5'UTR	island
cg22792735	AXIN2	-0.183473	0.316491	-7.42282	1.85126e-12	1.08124e-10	17.5189	0.289858	0.473332	0.183473	R	II	TSS1500	shore
cg06875131	AXIN2	-0.169678	0.288264	-7.28966	4.19351e-12	2.29442e-10	16.7163	0.263633	0.433311	0.169678	F	II	Body	shore
cg04293307	AXIN2	-0.103102	0.0921962	-6.83664	6.31831e-11	2.76549e-09	14.0575	0.0772297	0.180332	0.103102	F	II	Body	shelf
cg11035174	NOTUM	-0.0425618	0.0263062	-6.16249	2.89454e-09	9.06915e-08	10.3205	0.0201279	0.0626897	0.0425618	R	II	1stExon	island
cg06825512	APCDD1	-0.180856	0.496246	-5.60141	5.65786e-08	1.35534e-06	7.42868	0.469993	0.650849	0.180856	F	II	TSS1500	shore
cg04685962	NKD1	-0.23	0.711162	-5.36142	1.89596e-07	4.05372e-06	6.25672	0.677775	0.907775	0.23	F	I	Body	shore
cg25748136	AXIN2	-0.069862	0.0654279	-5.2395	3.45278e-07	6.95811e-06	5.67689	0.0552867	0.125149	0.069862	R	II	5'UTR	shore
cg14955300	NOTUM	-0.0284203	0.0179935	-5.12635	5.96786e-07	1.13564e-05	5.14831	0.013868	0.0422882	0.0284203	R	I	TSS200	island
cg17797591	AXIN2	-0.088679	0.07831	-4.99557	1.11087e-06	1.97785e-05	4.54903	0.0654372	0.154116	0.088679	F	II	5'UTR	shore
cg12255061	AXIN2	-0.189007	0.472743	-4.95696	1.3315e-06	2.32041e-05	4.3745	0.445307	0.634314	0.189007	F	II	Body	island
cg19264571	APCDD1	-0.122434	0.546902	-4.44085	1.35257e-05	0.000178681	2.15009	0.52913	0.651564	0.122434	F	II	TSS1500	island
cg26665701	NKD1	0.123098	0.733704	4.16402	4.32405e-05	0.000486146	1.04273	0.751573	0.628475	-0.123098	F	II	Body	shelf
cg00828762	DKK4	-0.0462492	0.067927	-4.13166	4.93463e-05	0.000543712	0.917278	0.0612134	0.107463	0.0462492	F	II	TSS200	opensea
cg23011419	AXIN2	-0.152784	0.600869	-4.09771	5.66303e-05	0.000611848	0.78661	0.57869	0.731474	0.152784	F	II	Body	opensea
cg16197636	DKK4	-0.056218	0.103462	-3.98456	8.90308e-05	0.000898467	0.357943	0.0953016	0.15152	0.056218	F	II	TSS200	opensea
cg16208433	NKD1	-0.022682	0.0227359	-3.95666	9.93911e-05	0.000986412	0.253822	0.0194434	0.0421253	0.022682	R	II	TSS200	island
cg08005093	AXIN2	-0.188716	0.746882	-3.85145	0.000149692	0.00139114	-0.132877	0.719488	0.908204	0.188716	F	I	Body	shore
cg26308530	AXIN2	-0.0681943	0.174393	-3.84998	0.000150541	0.00139752	-0.138206	0.164494	0.232688	0.0681943	R	II	TSS1500	shore
cg10965669	AXIN2	-0.121056	0.68958	-3.83588	0.000158924	0.00146197	-0.189298	0.672007	0.793064	0.121056	F	I	Body	island
cg06899970	DKK4	-0.0388666	0.0593693	-3.47368	0.000606108	0.00439508	-1.44449	0.0537274	0.092594	0.0388666	F	II	5'UTR	opensea
cg02571142	DKK4	-0.0770454	0.202557	-3.39909	0.000788194	0.00543804	-1.68904	0.191373	0.268419	0.0770454	R	II	TSS200	opensea
cg12132563	NOTUM	-0.0214877	0.022025	-3.35246	0.000926719	0.00618333	-1.83944	0.0189059	0.0403935	0.0214877	F	II	Body	island
cg09297903	DKK4	-0.0654089	0.192631	-3.30871	0.00107707	0.00696869	-1.97886	0.183136	0.248545	0.0654089	R	II	TSS200	opensea
cg11096905	AXIN2	-0.132167	0.532816	-3.2569	0.00128433	0.00799485	-2.14175	0.51363	0.645797	0.132167	R	II	Body	shore
cg05226466	NKD1	0.081106	0.825728	3.25607	0.00128795	0.00801201	-2.14436	0.837501	0.756395	-0.081106	R	II	Body	shore
cg00753714	NKD1	0.0846089	0.798156	3.24127	0.00135381	0.00833519	-2.19046	0.810438	0.725829	-0.0846089	F	II	Body	shelf
cg00503804	NKD1	-0.0105992	0.01462	-3.06784	0.0023964	0.012874	-2.71615	0.0130814	0.0236807	0.0105992	F	II	TSS1500	island
cg06812033	NKD1	-0.0221889	0.0328357	-2.92354	0.00378229	0.0177685	-3.13315	0.0296147	0.0518036	0.0221889	F	II	5'UTR	island
cg01762581	DKK4	-0.0899678	0.276308	-2.82872	0.00505725	0.0212973	-3.39692	0.263248	0.353216	0.0899678	F	II	5'UTR	opensea
cg09392386	AXIN2	-0.0106772	0.0405201	-2.81942	0.00520145	0.0216561	-3.42238	0.0389702	0.0496474	0.0106772	F	I	TSS200	island
cg09231741	AXIN2	-0.1061	0.529609	-2.78156	0.00582737	0.0231524	-3.52511	0.514208	0.620308	0.1061	R	II	Body	island
cg03064228	NKD1	0.0704908	0.81797	2.74963	0.00640754	0.0244173	-3.61074	0.828203	0.757712	-0.0704908	F	II	Body	island
cg04614386	NKD1	0.0706955	0.813116	2.72895	0.00681065	0.025247	-3.6657	0.823378	0.752683	-0.0706955	F	II	Body	shore
cg26746669	NKD1	0.0715246	0.763059	2.72205	0.00695007	0.0255359	-3.68393	0.773441	0.701917	-0.0715246	F	II	Body	opensea
cg07799035	NKD1	0.0640731	0.838639	2.68736	0.00769148	0.027047	-3.77504	0.84794	0.783867	-0.0640731	F	II	Body	opensea
cg13462387	APCDD1	0.072208	0.739082	2.63985	0.00882266	0.02929	-3.89803	0.749564	0.677356	-0.072208	R	II	Body	island
cg21209091	DKK4	-0.0181595	0.0559908	-2.62025	0.00933121	0.0302829	-3.94815	0.0533547	0.0715142	0.0181595	F	II	TSS1500	opensea
cg04264766	NKD1	0.0691907	0.786692	2.60989	0.00961054	0.0308311	-3.97451	0.796735	0.727545	-0.0691907	F	II	Body	island
cg02366988	AXIN2	-0.00753836	0.0314552	-2.54948	0.011394	0.0342461	-4.12621	0.0303609	0.0378992	0.00753836	F	II	TSS1500	shore
cg02839071	APCDD1	0.0648852	0.805016	2.41145	0.01662	0.044193	-4.46018	0.814435	0.74955	-0.0648852	F	II	Body	shore
cg02015823	NKD1	-0.0965723	0.619179	-2.3718	0.0184692	0.0476446	-4.55283	0.605161	0.701733	0.0965723	R	II	Body	shore

## Sheet: Sup Table 7
Supplementary Table 7: Relative expression (log-CPM) and mean beta value for four Wnt negative regualtor genes (AXIN2, NKD1, NOTUM and APCDD1) in tumours classified as LD or LI in discovery cohort A
sample	type	AXIN2_methylation	AXIN2_expression	NKD1_methylation	NKD1_expression	NOTUM_methylation	NOTUM_expression	APCDD1_methylation	APCDD1_expression
TCGA.A6.2675.01	LI	0.60768	6.39787	0.658351	4.74545	0.020495	1.09921	0.162258	4.41442
TCGA.A6.3810.01	LI	0.530354	5.5352	0.58609	5.89845	0.029514	-2.5865	0.153134	4.15559
TCGA.A6.5656.01	LI	0.479837	7.32925	0.39841	6.62489	0.030932	3.84838	0.165683	4.67353
TCGA.A6.5659.01	LI	0.419941	7.73092	0.339729	6.62557	0.337578	4.12718	0.117449	6.00157
TCGA.A6.5660.01	LI	0.427817	7.75259	0.543341	5.59866	0.021145	2.50395	0.171712	5.48245
TCGA.A6.5661.01	LI	0.512053	3.85364	0.691659	3.48655	0.652206	-1.82185	0.527574	2.90498
TCGA.A6.5664.01	LI	0.443079	6.93173	0.492759	6.57394	0.032432	6.90374	0.205744	6.40834
TCGA.A6.5665.01	LD	0.574206	3.46353	0.707197	1.99892	0.667935	-3.98834	0.537909	2.82223
TCGA.A6.5666.01	LI	0.181606	8.80682	0.343034	6.93483	0.034985	10.4407	0.157493	9.65283
TCGA.A6.5667.01	LI	0.589815	7.02791	0.759919	3.93769	0.020127	-0.80892	0.179384	2.61348
TCGA.A6.6137.01	LI	0.36394	8.63911	0.583405	5.26831	0.023245	3.98545	0.280226	5.82978
TCGA.A6.6138.01	LI	0.523212	5.88046	0.503662	6.32569	0.024104	-0.62549	0.148986	5.20243
TCGA.A6.6140.01	LI	0.52473	7.46593	0.375648	6.82705	0.023021	5.33345	0.143376	6.64378
TCGA.A6.6141.01	LI	0.519625	7.0199	0.583239	3.88865	0.264047	3.46695	0.203123	4.2123
TCGA.A6.6142.01	LI	0.517593	7.96528	0.479105	7.48645	0.023333	5.43845	0.183038	8.64097
TCGA.A6.6648.01	LI	0.541227	8.12276	0.684487	3.22527	0.027803	1.58263	0.15902	3.51116
TCGA.A6.6649.01	LD	0.493979	4.97083	0.448697	3.96132	0.333956	2.66423	0.181957	4.96181
TCGA.A6.6650.01	LI	0.470962	5.97094	0.633804	3.47605	0.073583	-1.05535	0.112602	2.70604
TCGA.A6.6651.01	LI	0.512665	6.90656	0.518395	5.20692	0.047793	5.24357	0.212175	6.42083
TCGA.A6.6653.01	LD	0.607083	4.50812	0.761139	2.30743	0.72043	1.5259	0.700609	3.58565
TCGA.A6.6654.01	LI	0.516442	7.35197	0.462938	6.86084	0.038737	1.62607	0.206871	5.9166
TCGA.A6.6780.01	LI	0.642569	2.68831	0.728855	1.33458	0.08433	-4.5142	0.218711	1.96925
TCGA.A6.6781.01	LD	0.595177	4.85371	0.690736	2.38356	0.223751	-0.27701	0.226373	4.01686
TCGA.A6.6782.01	LI	0.436396	7.30691	0.488476	5.40529	0.025748	3.91245	0.168895	5.18059
TCGA.AA.3489.01	LI	0.520618	7.29663	0.534876	5.91816	0.098201	1.16921	0.208081	6.69145
TCGA.AA.3502.01	LI	0.286583	7.03873	0.630435	2.8518	0.445522	0.988333	0.147414	2.657
TCGA.AA.3510.01	LI	0.258054	7.60758	0.589873	5.86834	0.025306	3.12108	0.198431	5.01518
TCGA.AA.3511.01	LI	0.655981	5.61689	0.56601	5.3658	0.024235	-0.35524	0.174609	5.99083
TCGA.AA.3655.01	LI	0.575014	6.60156	0.546244	1.94077	0.093208	-1.20708	0.119508	5.79976
TCGA.AA.3660.01	LI	0.191962	8.33162	0.357015	7.5417	0.098159	7.41221	0.13104	8.07901
TCGA.AA.3662.01	LI	0.250833	8.17129	0.311358	8.09226	0.020067	8.38102	0.133264	7.88995
TCGA.AA.3697.01	LI	0.473416	7.27045	0.451655	5.08366	0.01858	5.2167	0.13986	5.38819
TCGA.AA.3713.01	LI	0.600778	3.55748	0.778229	4.12865	0.543547	-1.59298	0.483322	2.71297
TCGA.AD.5900.01	LD	0.517712	3.57242	0.680275	1.61953	0.593129	-1.76769	0.406221	3.5745
TCGA.AD.6548.01	LI	0.352567	7.80567	0.578003	4.38467	0.076847	5.93159	0.181089	8.11297
TCGA.AD.6888.01	LI	0.454508	8.02915	0.469192	7.04061	0.04325	8.85467	0.184812	7.39948
TCGA.AD.6889.01	LD	0.645513	5.76218	0.802191	3.35914	0.767072	-0.70055	0.701283	2.51198
TCGA.AD.6890.01	LI	0.419692	7.71692	0.513504	5.36794	0.026569	6.0786	0.179223	6.55847
TCGA.AD.6895.01	LD	0.554226	3.66308	0.666074	3.61078	0.521242	0.958711	0.405603	2.89219
TCGA.AD.6901.01	LI	0.464633	7.66457	0.483463	7.64942	0.024919	2.97138	0.176514	5.40403
TCGA.AD.6964.01	LD	0.679964	5.42762	0.744749	1.83489	0.053754	-2.73405	0.234324	2.87048
TCGA.AD.6965.01	LI	0.223892	7.7868	0.439766	5.87356	0.023768	6.4804	0.113767	5.827
TCGA.AM.5820.01	LI	0.501552	7.04451	0.537312	2.41132	0.022142	0.91129	0.132554	2.15248
TCGA.AM.5821.01	LI	0.594682	3.79854	0.683547	4.47187	0.613982	2.54458	0.221345	3.31366
TCGA.AU.3779.01	LI	0.56045	7.16155	0.646091	3.66803	0.019364	0.527556	0.181516	5.45625
TCGA.AU.6004.01	LD	0.585397	4.16214	0.691832	1.93079	0.514725	-0.80338	0.496207	3.59802
TCGA.AY.5543.01	LI	0.437989	7.32373	0.463117	3.81588	0.032958	2.16175	0.193073	4.92389
TCGA.AY.6196.01	LD	0.606492	3.9324	0.533592	3.1585	0.047258	2.13269	0.16428	5.35291
TCGA.AY.6197.01	LI	0.583128	5.79056	0.718031	2.76328	0.121242	-0.10895	0.219886	2.39106
TCGA.AY.6386.01	LI	0.292754	7.53292	0.53405	3.05314	0.027868	0.761681	0.177472	4.02681
TCGA.AZ.4315.01	LI	0.465391	5.45411	0.691872	3.11414	0.32906	-0.47954	0.198378	3.9865
TCGA.AZ.4323.01	LD	0.637366	4.32019	0.613269	5.12583	0.073599	3.57068	0.391086	4.68978
TCGA.AZ.4615.01	LD	0.583616	4.47073	0.709958	1.2191	0.57769	-2.01987	0.564598	2.57224
TCGA.AZ.4616.01	LI	0.505757	6.15276	0.563687	4.55047	0.051696	4.4876	0.1918	6.46863
TCGA.AZ.4682.01	LI	0.436456	7.13311	0.406663	6.52703	0.019167	4.69371	0.136818	6.73218
TCGA.AZ.5407.01	LI	0.323931	7.32129	0.553294	2.52259	0.534884	-0.01858	0.383833	2.57783
TCGA.AZ.6598.01	LD	0.589327	3.27596	0.616475	2.09571	0.735668	1.68249	0.655412	2.21425
TCGA.AZ.6599.01	LI	0.32665	7.10654	0.616272	4.10256	0.081569	1.31131	0.418432	1.26816
TCGA.AZ.6600.01	LI	0.436724	6.22945	0.561948	3.23252	0.034133	1.03577	0.201567	2.988
TCGA.AZ.6601.01	LI	0.616375	5.2103	0.687978	1.06504	0.112516	-0.94275	0.274696	1.78751
TCGA.AZ.6605.01	LI	0.505775	5.59258	0.549436	3.10472	0.044908	0.564427	0.187864	4.9949
TCGA.CA.5255.01	LD	0.526794	4.96908	0.624717	1.7216	0.157118	-0.97406	0.182221	2.52626
TCGA.CA.5796.01	LD	0.639399	5.63706	0.680192	-2.57676	0.185881	-3.39874	0.338011	1.36722
TCGA.CA.5797.01	LI	0.119704	7.22802	0.495415	4.2599	0.028695	0.242635	0.185386	6.70527
TCGA.CA.6717.01	LI	0.549482	6.04234	0.649867	2.77936	0.102283	-0.22715	0.197367	3.95665
TCGA.CA.6718.01	LI	0.53788	4.92816	0.633327	4.8794	0.327662	5.15622	0.208542	5.21223
TCGA.CK.4947.01	LI	0.123145	7.49912	0.569546	3.00947	0.187479	0.374147	0.199178	4.01772
TCGA.CK.4948.01	LI	0.235233	8.21965	0.455573	6.34158	0.023833	6.37551	0.17789	5.40673
TCGA.CK.4950.01	LI	0.123154	6.81285	0.619938	3.71611	0.480338	-1.0124	0.174113	6.00511
TCGA.CK.4952.01	LI	0.466399	5.6727	0.598635	2.73947	0.734158	2.522	0.554866	2.46576
TCGA.CK.5913.01	LD	0.71609	3.52708	0.678509	1.63274	0.684978	-0.27616	0.27283	3.42334
TCGA.CK.5914.01	LI	0.536413	7.32442	0.63906	5.23505	0.029193	2.72045	0.287787	4.79486
TCGA.CK.5915.01	LI	0.09442	8.8371	0.570824	3.90793	0.020793	4.48814	0.112927	7.85281
TCGA.CK.5916.01	LD	0.608785	3.72556	0.716255	2.65129	0.587631	1.81038	0.492463	4.77933
TCGA.CM.4744.01	LI	0.085259	8.02033	0.784625	4.34588	0.023874	5.37272	0.171566	6.73252
TCGA.CM.4746.01	LI	0.603528	7.05001	0.742973	3.60984	0.026043	2.40633	0.247198	7.95725
TCGA.CM.4750.01	LI	0.476379	7.00937	0.566167	5.50026	0.023666	3.28978	0.150609	5.29098
TCGA.CM.4752.01	LI	0.468352	6.11137	0.741183	2.21635	0.156003	0.973739	0.157571	4.58419
TCGA.CM.5341.01	LI	0.546728	4.95324	0.720981	1.39304	0.131031	-0.69312	0.179163	3.49736
TCGA.CM.5349.01	LI	0.349085	7.09824	0.579472	5.29817	0.371643	1.73379	0.250369	5.1386
TCGA.CM.5861.01	LD	0.621735	3.6375	0.717449	1.62912	0.643012	-0.33058	0.621669	2.2898
TCGA.CM.5862.01	LI	0.166671	7.60037	0.277106	6.95645	0.029678	7.26286	0.101662	8.8092
TCGA.CM.5863.01	LI	0.472802	6.90954	0.692345	2.34909	0.107216	2.83154	0.379029	4.6536
TCGA.CM.5864.01	LI	0.186904	8.07381	0.316856	8.46927	0.023859	8.92048	0.151702	7.95765
TCGA.CM.6162.01	LD	0.617748	5.12099	0.812182	1.28021	0.033278	-1.11936	0.288425	4.97426
TCGA.CM.6163.01	LI	0.464437	6.95353	0.579376	2.16979	0.033258	-2.43082	0.1971	5.12211
TCGA.CM.6164.01	LI	0.515262	7.33548	0.544919	5.70132	0.05425	4.44389	0.201692	6.70207
TCGA.CM.6165.01	LI	0.600547	6.29218	0.729526	5.07041	0.021005	-0.05287	0.283344	5.06929
TCGA.CM.6166.01	LI	0.246856	8.44998	0.303732	7.50663	0.023882	5.73618	0.161658	7.60884
TCGA.CM.6167.01	LD	0.583058	5.52392	0.555671	4.29127	0.037507	1.11987	0.195213	4.21174
TCGA.CM.6168.01	LI	0.471911	6.72602	0.632754	2.89526	0.072574	-0.99715	0.20353	4.54329
TCGA.CM.6170.01	LI	0.661748	5.13513	0.607643	4.68294	0.039354	0.337179	0.178415	4.19324
TCGA.CM.6171.01	LD	0.448576	6.20841	0.656168	3.2631	0.496068	3.27605	0.669403	3.2633
TCGA.CM.6172.01	LI	0.286778	7.5563	0.695029	4.09333	0.109531	1.70895	0.160577	5.48248
TCGA.CM.6674.01	LD	0.689072	5.02248	0.844554	1.69277	0.274369	1.14628	0.283032	3.08722
TCGA.CM.6675.01	LI	0.441322	7.39231	0.291358	5.01493	0.672177	4.99603	0.681393	3.32594
TCGA.CM.6676.01	LI	0.491569	8.21428	0.44751	7.32012	0.073764	5.27797	0.187377	9.14741
TCGA.CM.6678.01	LI	0.278006	7.56045	0.419086	5.609	0.025296	3.85884	0.175396	7.79734
TCGA.CM.6679.01	LI	0.491893	6.82723	0.458879	5.586	0.068543	0.924755	0.190192	3.80004
TCGA.CM.6680.01	LI	0.296246	7.80479	0.501155	5.71618	0.034801	4.90529	0.165018	6.20791
TCGA.D5.5537.01	LI	0.256606	7.80394	0.381677	6.28886	0.038458	4.74484	0.189192	5.25315
TCGA.D5.5538.01	LI	0.185089	6.9996	0.441927	4.00904	0.032036	3.23061	0.201965	3.59702
TCGA.D5.5539.01	LI	0.440694	6.7592	0.56208	3.49878	0.031183	0.115123	0.154751	3.66486
TCGA.D5.5540.01	LI	0.199927	7.9386	0.333976	7.04654	0.034986	2.33541	0.157859	6.75789
TCGA.D5.6531.01	LI	0.152214	8.62805	0.295264	6.60167	0.498734	2.19306	0.103877	8.37077
TCGA.D5.6532.01	LI	0.30791	7.26688	0.372172	6.28181	0.042931	4.56059	0.129377	6.24424
TCGA.D5.6533.01	LI	0.603223	7.25022	0.45053	6.78946	0.02664	3.98866	0.139971	6.14952
TCGA.D5.6535.01	LI	0.617251	7.34694	0.719581	4.37978	0.077624	2.47408	0.199745	5.20616
TCGA.D5.6536.01	LI	0.529964	7.18109	0.553745	5.57578	0.026165	7.47176	0.263344	8.63974
TCGA.D5.6537.01	LI	0.427017	8.41526	0.39625	5.80279	0.017721	4.35661	0.110031	8.41078
TCGA.D5.6538.01	LI	0.402688	7.81253	0.209288	8.38052	0.015976	9.02375	0.486134	4.20394
TCGA.D5.6539.01	LD	0.607479	5.33499	0.652821	3.06397	0.037609	-1.32037	0.272077	2.72281
TCGA.D5.6540.01	LI	0.576895	3.39995	0.70952	1.1231	0.621521	0.049729	0.595039	3.3011
TCGA.D5.6898.01	LI	0.542644	5.69754	0.676768	2.60271	0.085355	-1.89917	0.218762	3.51171
TCGA.D5.6920.01	LI	0.369865	7.77373	0.641947	3.85825	0.04112	2.71489	0.177822	5.10524
TCGA.D5.6922.01	LI	0.471838	6.65963	0.543697	3.25722	0.066341	-1.83653	0.143694	5.72726
TCGA.D5.6924.01	LI	0.303945	8.24302	0.41681	6.93664	0.061435	5.61433	0.198912	7.41431
TCGA.D5.6926.01	LI	0.503377	6.2111	0.390492	6.51356	0.029462	1.20647	0.15848	3.23628
TCGA.D5.6928.01	LD	0.676309	3.51193	0.654097	3.57871	0.269352	1.56532	0.248073	4.6987
TCGA.D5.6930.01	LD	0.628499	3.30233	0.63775	0.765598	0.566262	-0.80423	0.435648	3.83515
TCGA.D5.6931.01	LI	0.463224	6.88993	0.50041	6.10194	0.503676	3.30234	0.204268	5.45223
TCGA.D5.6932.01	LI	0.53701	6.84655	0.444073	6.86743	0.036932	3.8362	0.224985	3.74406
TCGA.D5.7000.01	LI	0.516114	5.77642	0.672677	3.14784	0.336415	0.099573	0.375956	3.90166
TCGA.DM.A0X9.01	LI	0.199242	7.33486	0.358813	4.84091	0.238186	1.59686	0.115143	6.98161
TCGA.DM.A0XD.01	LI	0.270299	7.24819	0.592584	4.34934	0.272418	1.73081	0.163325	5.82303
TCGA.DM.A0XF.01	LI	0.505988	5.42699	0.516153	3.60951	0.020889	2.76364	0.173804	4.66073
TCGA.DM.A1D0.01	LI	0.380631	8.14932	0.388547	5.63092	0.014214	6.99416	0.228237	5.44195
TCGA.DM.A1D6.01	LI	0.384296	7.0006	0.873577	3.14604	0.015985	-0.29421	0.194185	2.48147
TCGA.DM.A1D7.01	LI	0.413141	6.22022	0.528966	2.96263	0.032923	1.09885	0.185844	3.65583
TCGA.DM.A1D8.01	LI	0.489264	6.49901	0.547151	4.29631	0.357833	1.41108	0.203121	5.22743
TCGA.DM.A1DA.01	LI	0.131973	6.81749	0.774419	4.60694	0.023256	3.47146	0.636201	1.31613
TCGA.DM.A1DB.01	LI	0.258199	7.8384	0.567536	5.53972	0.018597	1.99806	0.142614	5.22011
TCGA.DM.A1HA.01	LI	0.200857	8.27922	0.376282	6.81054	0.013883	10.2761	0.056487	6.58107
TCGA.DM.A1HB.01	LD	0.523333	4.88084	0.70054	2.70003	0.660896	-1.09683	0.581607	2.21204
TCGA.DM.A282.01	LI	0.41922	6.94479	0.427721	6.42403	0.023591	4.01653	0.158218	5.92096
TCGA.DM.A285.01	LI	0.476434	6.37056	0.658547	3.06364	0.127846	0.978855	0.426251	3.04095
TCGA.DM.A28C.01	LI	0.138085	7.83611	0.305586	7.83893	0.033246	1.81893	0.103831	8.59254
TCGA.DM.A28E.01	LI	0.452394	6.10367	0.317261	6.6404	0.021471	5.61368	0.11915	5.67302
TCGA.DM.A28F.01	LI	0.480903	5.97329	0.693168	2.53687	0.063514	-0.01039	0.174245	3.21501
TCGA.DM.A28G.01	LI	0.273134	7.94572	0.458315	7.03076	0.036563	5.5515	0.164799	6.93359
TCGA.DM.A28H.01	LI	0.481554	5.61082	0.707456	2.20089	0.04072	-1.08943	0.206546	2.77153
TCGA.DM.A28K.01	LI	0.516778	5.78418	0.589993	1.83537	0.178843	0.307449	0.174181	2.51473
TCGA.DM.A28M.01	LI	0.419407	7.64595	0.525479	5.77282	0.047571	-0.40114	0.155611	4.90733
TCGA.F4.6460.01	LI	0.358227	7.81894	0.383575	7.729	0.021069	7.22143	0.269081	6.23699
TCGA.F4.6461.01	LI	0.552028	6.69355	0.704547	6.24444	0.609195	3.44149	0.29866	3.62493
TCGA.F4.6463.01	LI	0.340856	8.23281	0.411857	8.49468	0.027647	7.693	0.176459	9.79341
TCGA.F4.6569.01	LI	0.495776	7.5951	0.534997	5.3182	0.049843	4.74467	0.218315	5.1051
TCGA.F4.6570.01	LD	0.581154	4.94433	0.716788	0.676692	0.622808	1.38796	0.641299	2.70503
TCGA.F4.6703.01	LI	0.721036	4.84136	0.646599	5.31466	0.049379	6.39662	0.258888	7.10279
TCGA.F4.6805.01	LD	0.637425	6.62225	0.653767	5.04084	0.062217	0.323084	0.249537	5.19146
TCGA.F4.6806.01	LI	0.278459	7.9332	0.620613	6.90107	0.076802	5.85699	0.415442	6.37003
TCGA.F4.6808.01	LI	0.4817	6.4756	0.496933	4.47161	0.021788	4.48278	0.174033	5.1838
TCGA.F4.6809.01	LI	0.55366	5.49657	0.468917	6.29242	0.098589	2.38894	0.207406	5.95679
TCGA.F4.6855.01	LI	0.416795	7.17724	0.553125	3.80476	0.03142	0.591823	0.141846	5.90074
TCGA.F4.6856.01	LD	0.497248	6.53767	0.670737	0.906343	0.465493	-1.21923	0.330135	2.26132
TCGA.G4.6293.01	LI	0.483384	8.8583	0.566455	6.80896	0.041504	7.5611	0.179115	9.31282
TCGA.G4.6294.01	LI	0.425013	6.76888	0.311713	7.43596	0.018522	4.49809	0.14038	6.09037
TCGA.G4.6295.01	LI	0.499257	5.56452	0.309872	6.19487	0.025059	7.19886	0.120215	5.07402
TCGA.G4.6297.01	LI	0.501681	5.00049	0.431777	6.00734	0.021743	3.71001	0.177094	5.39652
TCGA.G4.6298.01	LI	0.475969	7.19932	0.482421	8.20631	0.029961	2.87446	0.182527	4.9147
TCGA.G4.6299.01	LD	0.467271	4.83322	0.583901	2.35726	0.565216	1.8585	0.56027	2.79604
TCGA.G4.6302.01	LD	0.725524	4.65699	0.665277	3.83856	0.197529	0.52133	0.372629	3.44634
TCGA.G4.6303.01	LI	0.619993	6.72188	0.871873	4.81592	0.021404	0.505373	0.191016	4.21031
TCGA.G4.6306.01	LI	0.555932	7.4657	0.509369	6.73181	0.024311	7.29964	0.175427	5.68926
TCGA.G4.6307.01	LI	0.62198	6.85286	0.730423	4.1764	0.022598	0.703155	0.113003	3.76989
TCGA.G4.6309.01	LI	0.637976	5.85616	0.886757	1.11488	0.097803	-1.87117	0.190537	3.43777
TCGA.G4.6310.01	LD	0.474438	6.49948	0.47888	4.33598	0.018147	0.011134	0.167799	2.94514
TCGA.G4.6311.01	LI	0.461764	7.2187	0.569752	4.73462	0.037056	2.43025	0.157863	4.14944
TCGA.G4.6314.01	LI	0.454362	7.65043	0.402662	8.48902	0.022001	8.55613	0.182375	4.86379
TCGA.G4.6315.01	LI	0.443835	7.84168	0.495596	7.05797	0.017763	7.23867	0.129409	6.73172
TCGA.G4.6317.01	LI	0.18454	7.32777	0.413585	6.27755	0.04345	4.13883	0.259174	4.44787
TCGA.G4.6320.01	LI	0.484872	6.03303	0.58802	3.86828	0.521367	5.12164	0.637256	1.59129
TCGA.G4.6322.01	LI	0.539425	6.57596	0.644344	2.4989	0.109741	-2.83553	0.473386	2.47022
TCGA.G4.6323.01	LI	0.12286	7.68538	0.540785	5.19723	0.039288	3.14805	0.204248	4.97576
TCGA.G4.6586.01	LD	0.587108	4.02206	0.740674	1.63218	0.647271	-2.48479	0.515306	1.60595
TCGA.G4.6588.01	LD	0.691728	3.70498	0.82548	0.84437	0.585642	-1.14933	0.637885	2.90776
TCGA.G4.6625.01	LI	0.67091	5.94327	0.665547	4.50631	0.05098	2.25185	0.187136	7.90691
TCGA.G4.6626.01	LI	0.685305	6.10936	0.74631	1.91173	0.03094	-0.75426	0.178691	2.74465
TCGA.G4.6628.01	LD	0.639438	2.31747	0.680498	0.980141	0.591641	-2.09413	0.452653	2.5012
TCGA.QG.A5YX.01	LD	0.431002	5.44792	0.721291	1.65203	0.042441	-2.2791	0.146582	1.11112
TCGA.WS.AB45.01	LD	0.824896	2.96951	0.630705	1.2544	0.381842	0.891345	0.447267	5.27451
TCGA.AF.2687.01	LI	0.409259	6.56115	0.441985	5.98386	0.074835	5.79295	0.103937	5.79027
TCGA.AF.2690.01	LI	0.498945	7.69737	0.720089	4.53681	0.036885	3.24996	0.160953	6.78015
TCGA.AF.4110.01	LI	0.303024	8.19585	0.463238	8.14141	0.065989	9.17181	0.166244	9.48637
TCGA.AF.6136.01	LD	0.475582	4.77517	0.470655	3.15488	0.060129	0.402174	0.15605	3.5841
TCGA.AF.6655.01	LI	0.487526	7.26356	0.457599	6.14021	0.026654	2.29389	0.176	5.82235
TCGA.AG.3591.01	LI	0.426278	6.47542	0.574508	2.34003	0.278068	1.38539	0.138262	4.57259
TCGA.AG.3592.01	LI	0.450365	6.73546	0.542814	2.70321	0.205893	-0.29035	0.187272	4.36758
TCGA.AG.3725.01	LI	0.300536	8.37415	0.380411	7.5495	0.022856	5.82568	0.113229	6.61284
TCGA.AG.3731.01	LI	0.538776	5.9955	0.54265	5.51245	0.030676	4.54373	0.195979	5.07156
TCGA.AG.3742.01	LI	0.213317	8.17606	0.35237	7.82353	0.019891	4.76438	0.148911	8.41244
TCGA.AG.4021.01	LI	0.368306	7.04239	0.327255	5.22435	0.017183	2.17708	0.117761	4.78609
TCGA.AG.4022.01	LI	0.406258	7.27165	0.332254	7.50751	0.018931	7.54959	0.14602	7.00634
TCGA.AG.A01Y.01	LI	0.536201	6.57818	0.548829	5.18409	0.030261	0.614367	0.181434	4.56989
TCGA.AG.A020.01	LI	0.591977	6.57803	0.628002	2.91111	0.135412	-0.43497	0.286174	3.24424
TCGA.AG.A026.01	LI	0.489632	8.46999	0.842672	6.31728	0.04365	4.95295	0.283433	6.77624
TCGA.AH.6544.01	LI	0.600161	6.97454	0.742704	3.02998	0.047881	-0.78078	0.239219	3.03443
TCGA.AH.6643.01	LI	0.231261	8.57478	0.375415	8.71411	0.019806	8.73365	0.15796	10.4519
TCGA.AH.6644.01	LI	0.479974	6.76457	0.319926	7.7429	0.025686	4.14885	0.146469	6.49279
TCGA.AH.6897.01	LI	0.478476	7.87263	0.533736	4.97536	0.018801	4.09897	0.098323	4.1723
TCGA.AH.6903.01	LI	0.27571	7.88093	0.473261	5.52235	0.038046	1.67815	0.137907	6.35993
TCGA.BM.6198.01	LD	0.636509	5.22019	0.832244	2.40537	0.05309	-1.12071	0.289633	4.45814
TCGA.CI.6619.01	LI	0.153397	8.56651	0.465748	7.30889	0.046175	8.36972	0.154398	7.33756
TCGA.CI.6620.01	LI	0.129467	7.30474	0.518993	3.87578	0.036315	-0.80908	0.202908	3.84165
TCGA.CI.6621.01	LI	0.630704	6.59529	0.662056	5.62258	0.050773	0.629482	0.267431	5.99644
TCGA.CI.6622.01	LI	0.260969	6.95607	0.509146	5.8542	0.025983	5.44619	0.171683	6.49599
TCGA.CI.6624.01	LI	0.572791	5.55378	0.666644	3.60458	0.034231	-0.7615	0.18158	4.09094
TCGA.CL.4957.01	LI	0.408	5.79654	0.359355	5.89982	0.033709	4.04094	0.137005	6.81678
TCGA.CL.5917.01	LI	0.369308	6.86104	0.293528	7.8132	0.021879	7.0045	0.149266	6.51727
TCGA.CL.5918.01	LI	0.293352	8.28267	0.395534	6.83271	0.020219	5.40588	0.16772	8.35772
TCGA.DC.4749.01	LI	0.577903	6.91944	0.661838	4.8767	0.018862	4.45536	0.123693	6.03828
TCGA.DC.5337.01	LI	0.338612	7.40059	0.473555	3.85522	0.032093	4.36402	0.15933	8.25411
TCGA.DC.5869.01	LI	0.445374	6.34215	0.512367	5.22192	0.024868	3.80112	0.172469	4.12195
TCGA.DC.6154.01	LI	0.564042	6.7661	0.637292	6.45184	0.026433	4.00849	0.121348	2.48715
TCGA.DC.6157.01	LI	0.599646	7.15155	0.542868	6.55002	0.022255	4.36211	0.143242	7.19282
TCGA.DC.6158.01	LI	0.404209	6.98143	0.439359	6.57431	0.045523	4.92177	0.127106	7.33157
TCGA.DC.6683.01	LI	0.49347	5.83089	0.510774	4.54067	0.021213	-0.78101	0.159851	3.66609
TCGA.DT.5265.01	LD	0.573437	1.78141	0.618255	4.68528	0.617906	4.82989	0.195727	4.18597
TCGA.DY.A0XA.01	LI	0.315683	8.36883	0.40286	7.77321	0.728874	3.70156	0.271894	7.37584
TCGA.DY.A1DC.01	LI	0.603862	6.11994	0.654892	2.8588	0.038094	-0.85001	0.277008	3.7601
TCGA.DY.A1DD.01	LI	0.302305	8.77736	0.325377	7.27606	0.017303	8.88724	0.101215	9.13708
TCGA.DY.A1DF.01	LI	0.104347	6.84732	0.284476	4.2284	0.398991	3.32899	0.06367	5.4382
TCGA.DY.A1DG.01	LI	0.527796	7.06858	0.610487	6.76344	0.017831	4.81435	0.0697	6.29388
TCGA.DY.A1H8.01	LI	0.287714	8.34586	0.273549	8.65274	0.018502	8.87494	0.07997	9.7584
TCGA.EF.5830.01	LI	0.155645	8.93971	0.319283	7.75976	0.020313	7.80191	0.126654	7.01843
TCGA.EI.6506.01	LI	0.322663	7.23033	0.538027	5.28174	0.035243	0.552857	0.150089	5.77338
TCGA.EI.6508.01	LI	0.26169	6.52772	0.444849	4.87035	0.021463	3.52546	0.155289	5.78887
TCGA.EI.6509.01	LI	0.201045	7.92126	0.334628	7.70807	0.014853	6.05947	0.086876	6.18919
TCGA.EI.6511.01	LI	0.457629	7.61324	0.474416	6.39131	0.047856	5.36765	0.193229	6.36061
TCGA.EI.6512.01	LI	0.421875	7.47897	0.33278	6.74738	0.03334	5.96701	0.130219	6.31409
TCGA.EI.6514.01	LI	0.496315	7.84147	0.56706	6.50939	0.021619	5.21478	0.10762	8.02652
TCGA.EI.6881.01	LI	0.277385	7.89656	0.386575	7.22595	0.037876	5.58323	0.170992	6.96441
TCGA.EI.6882.01	LI	0.48062	6.86029	0.578866	2.98674	0.255611	1.73608	0.224651	3.69332
TCGA.EI.6883.01	LI	0.388648	8.27737	0.411148	7.70556	0.047692	7.02194	0.293947	8.64275
TCGA.EI.6884.01	LI	0.607547	5.95481	0.655636	3.79106	0.099104	-1.09163	0.231935	4.26568
TCGA.EI.6885.01	LI	0.594444	7.23063	0.505535	7.88002	0.531636	5.61302	0.192547	8.01092
TCGA.EI.6917.01	LI	0.51261	7.08328	0.69272	3.46571	0.540448	2.54571	0.185448	4.80353
TCGA.EI.7002.01	LI	0.445299	8.28798	0.37135	8.15945	0.022914	3.30215	0.145467	7.35748
TCGA.EI.7004.01	LD	0.710409	4.03571	0.662321	2.8553	0.19756	1.09466	0.213497	4.70043
TCGA.F5.6465.01	LI	0.470237	7.33368	0.402753	7.33664	0.041612	5.75032	0.171273	7.30292
TCGA.F5.6571.01	LI	0.432602	7.50557	0.413647	7.72459	0.051638	5.05769	0.173145	6.90943
TCGA.F5.6702.01	LI	0.601956	5.85114	0.529218	6.05458	0.188021	3.88415	0.204895	5.45085
TCGA.F5.6810.01	LD	0.418371	7.16728	0.494422	5.64639	0.025303	4.66377	0.113659	5.99317
TCGA.F5.6812.01	LI	0.621456	5.68166	0.609265	6.47307	0.053522	2.25489	0.187217	5.67777
TCGA.F5.6813.01	LI	0.648132	5.79622	0.645204	4.24357	0.052121	-0.36991	0.292534	4.29198
TCGA.F5.6814.01	LI	0.580535	6.06654	0.702398	5.02555	0.358393	1.04699	0.211857	7.93849
TCGA.F5.6861.01	LI	0.446067	7.56255	0.472166	6.90331	0.051018	3.79638	0.179763	6.33975
TCGA.F5.6863.01	LI	0.204198	7.81595	0.327646	8.81897	0.023035	8.42013	0.154621	8.37575
TCGA.F5.6864.01	LI	0.490913	6.66303	0.606134	2.88266	0.043266	0.541564	0.190785	3.2145
TCGA.G5.6233.01	LD	0.48726	4.9145	0.639946	2.94143	0.33354	2.62999	0.161639	3.3704
TCGA.G5.6235.01	LI	0.54689	7.12321	0.615612	6.89684	0.021099	5.67826	0.178504	6.89722
TCGA.G5.6572.01	LI	0.39682	8.05954	0.42824	7.61714	0.027946	5.9056	0.244988	9.32782
TCGA.G5.6641.01	LI	0.445482	7.10455	0.696869	2.95372	0.338605	1.22666	0.198124	5.16445

## Sheet: Sup Table 8
Supplementary Table 8: AUC and confidence intervals for each differentially expressed negative regulator.
Gene	AUC	CI
AXIN2	0.93	0.89-0.97
NKD1	0.9	0.87-0.94
APCDD1	0.84	0.80-0.89
NOTUM	0.82	0.77-0.87
NKK4	0.53	0.46-0.61

## Sheet: Sup Table 9
Supplementary Table 9: Comparison of clinical and histopathological variables between LD and LI tumours.
Attribute		LD	LI	p value	Sig	Method
Age		64.2	64.5	0.8653		t-test
Sex	Male	36/72 (50.0%)	336/560 (60.0%)	0.104556		chi-squared
Location	Cecum	21/62 (33.9%)	93/560 (18.2%)	8.75953e-06	*	chi-squared
	Ascending colon	16/62 (25.8%)	48/560 (9.4%)
	Hepatic flexure	3/62 (4.8%)	16/560 (3.1%)
	Transverse colon	6/62 (9.7%)	29/560 (5.7%)
	Splenic flexure	0/62 (0.0%)	11/560 (2.2%)
	Sigmoid colon	7/62 (11.3%)	168/560 (32.9%)
	Rectosigmoid junction	3/62 (4.8%)	52/560 (10.2%)
	Rectum	3/62 (4.8%)	75/560 (14.7%)
BRAF	Mutated	13/73 (17.8%)	18/562 (3.2%)	5.09657e-08	*	chi-squared
KRAS	Mutated	3/73 (4.1%)	146/562 (26.0%)	3.35441e-05	*	chi-squared
Microsatellite status	Unstable/MSI	42/73 (57.5%)	74/562 (13.2%)	2.72679e-20	*	chi-squared
Consensus molecular subtype	CMS1	30/63 (47.6%)	36/407 (8.8%)	3.27077e-18	*	chi-squared
	CMS2	1/63 (1.6%)	181/407 (44.5%)
	CMS3	11/63 (17.5%)	63/407 (15.5%)
	CMS4	21/63 (33.3%)	127/407 (31.2%)
Histopathology	Mucin area (%)	12.5	3.9	2.091e-05	*	t-test
	Stroma area (%)	39.2	36.1	0.1895		t-test
	Tumour area (%)	42.5	48.2	0.04049	*	t-test
	Gland formation (%)	53.4	61.3	0.1188		t-test

## Sheet: Sup Table 10
Supplementary Table 10: Comparison of clinical and histopathological variables between RSPO-high, RSPO-mutant and RNF43-mutant tumours.
Attribute		RNF43-mutant	RSPO-high	RSPO-fusion	Sig	p value	Method
Age		67	55.2	63.3	*	0.0299	ANOVA
Sex	Male	22/40 (55.0%)	3/12 (25.0%)	8/15 (53.3%)		0.17795	chi-squared
Location	Cecum	12/32 (37.5%)	5/12 (41.7%)	3/14 (21.3%)	*	0.00832603	chi-squared
	Ascending colon	14/32 (43.8%)	1/12 (8.3%)	1/14 (7.1%)
	Hepatic flexure	2/32 (6.3%)	1/12 (8.3%)	0/14 (0.0%)
	Transverse colon	1/32 (3.1%)	1/12 (8.3%)	3/14 (21.4%)
	Splenic flexure	0/32 (0.0%)	0/12 (0.0%	0/14 (0.0%
	Sigmoid colon	0/32 (0.0%)	3/12 (25.0%)	4/14 (28.6%)
	Rectosigmoid junction	0/32 (0.0%)	0/12 (0.0%	2/14 (14.3%)
	Rectum	1/32 (3.1%)	1/12 (8.3%)	1/14 (7.1%)
BRAF	Mutated	25/40 (62.5%)	2/13 (15.4%)	5/15 (33.3%)	*	0.00610459	chi-squared
KRAS	Mutated	6/40 (15.0%)	2/13 (15.4%)	3/15 (20%)		0.900972	chi-squared
Microsatellite status	Unstable/MSI	30/40 (75%)	5/13 (36.5%)	5/15 (33.3%)	*	0.00506573	chi-squared
Consensus molecular subtype	CMS1	25/34 (73.5%)	0/12 (0.0%)	4/12 (33.3%)	*	1.69813e-06	chi-squared
	CMS2	0/34 (0.0%)	1/12 (8.3%)	0/12 (0.0%)
	CMS3	4/34 (11.8%)	1/12 (8.3%)	6/12 (50%)
	CMS4	5/34 (14.7%)	10/12 (83.3%)	2/12 (16.7%)
Histopathology	Mucin area (%)	12.7	13.1	10		0.787	ANOVA
	Stroma area (%)	40.1	36.2	35.3		0.494	ANOVA
	Tumour area (%)	41.5	46.7	48.7		0.336	ANOVA
	Gland formation (%)	53.6	40.9	68.2		0.142	ANOVA	(p=0.06 for t-test between RSPO-mutant and RSPO-hi)

[truncated: 3 more sheets: Sup Table 11, Sup Table 12, Sup Table 13]
